# Supplementary material
Source: publisher figshare collection journal article supplement (https://gsapubs.figshare.com/articles/dataset/_/12540188)
Supplement: Supplementary file 1 [file 1]

GSA Data Repository 2018380

Mulder, J.A., et al., 2018, Rodinian devil in disguise: Correlation of 1.25–1.10 Ga strata between Tasmania and Grand Canyon: *Geology*, <https://doi.org/10.1130/G45225.1>.

Table DR1: Zircon U-Pb isotope data and methods

Table DR2: Zircon Hf isotope data and methods

Correlation chart of simplified stratigraphy

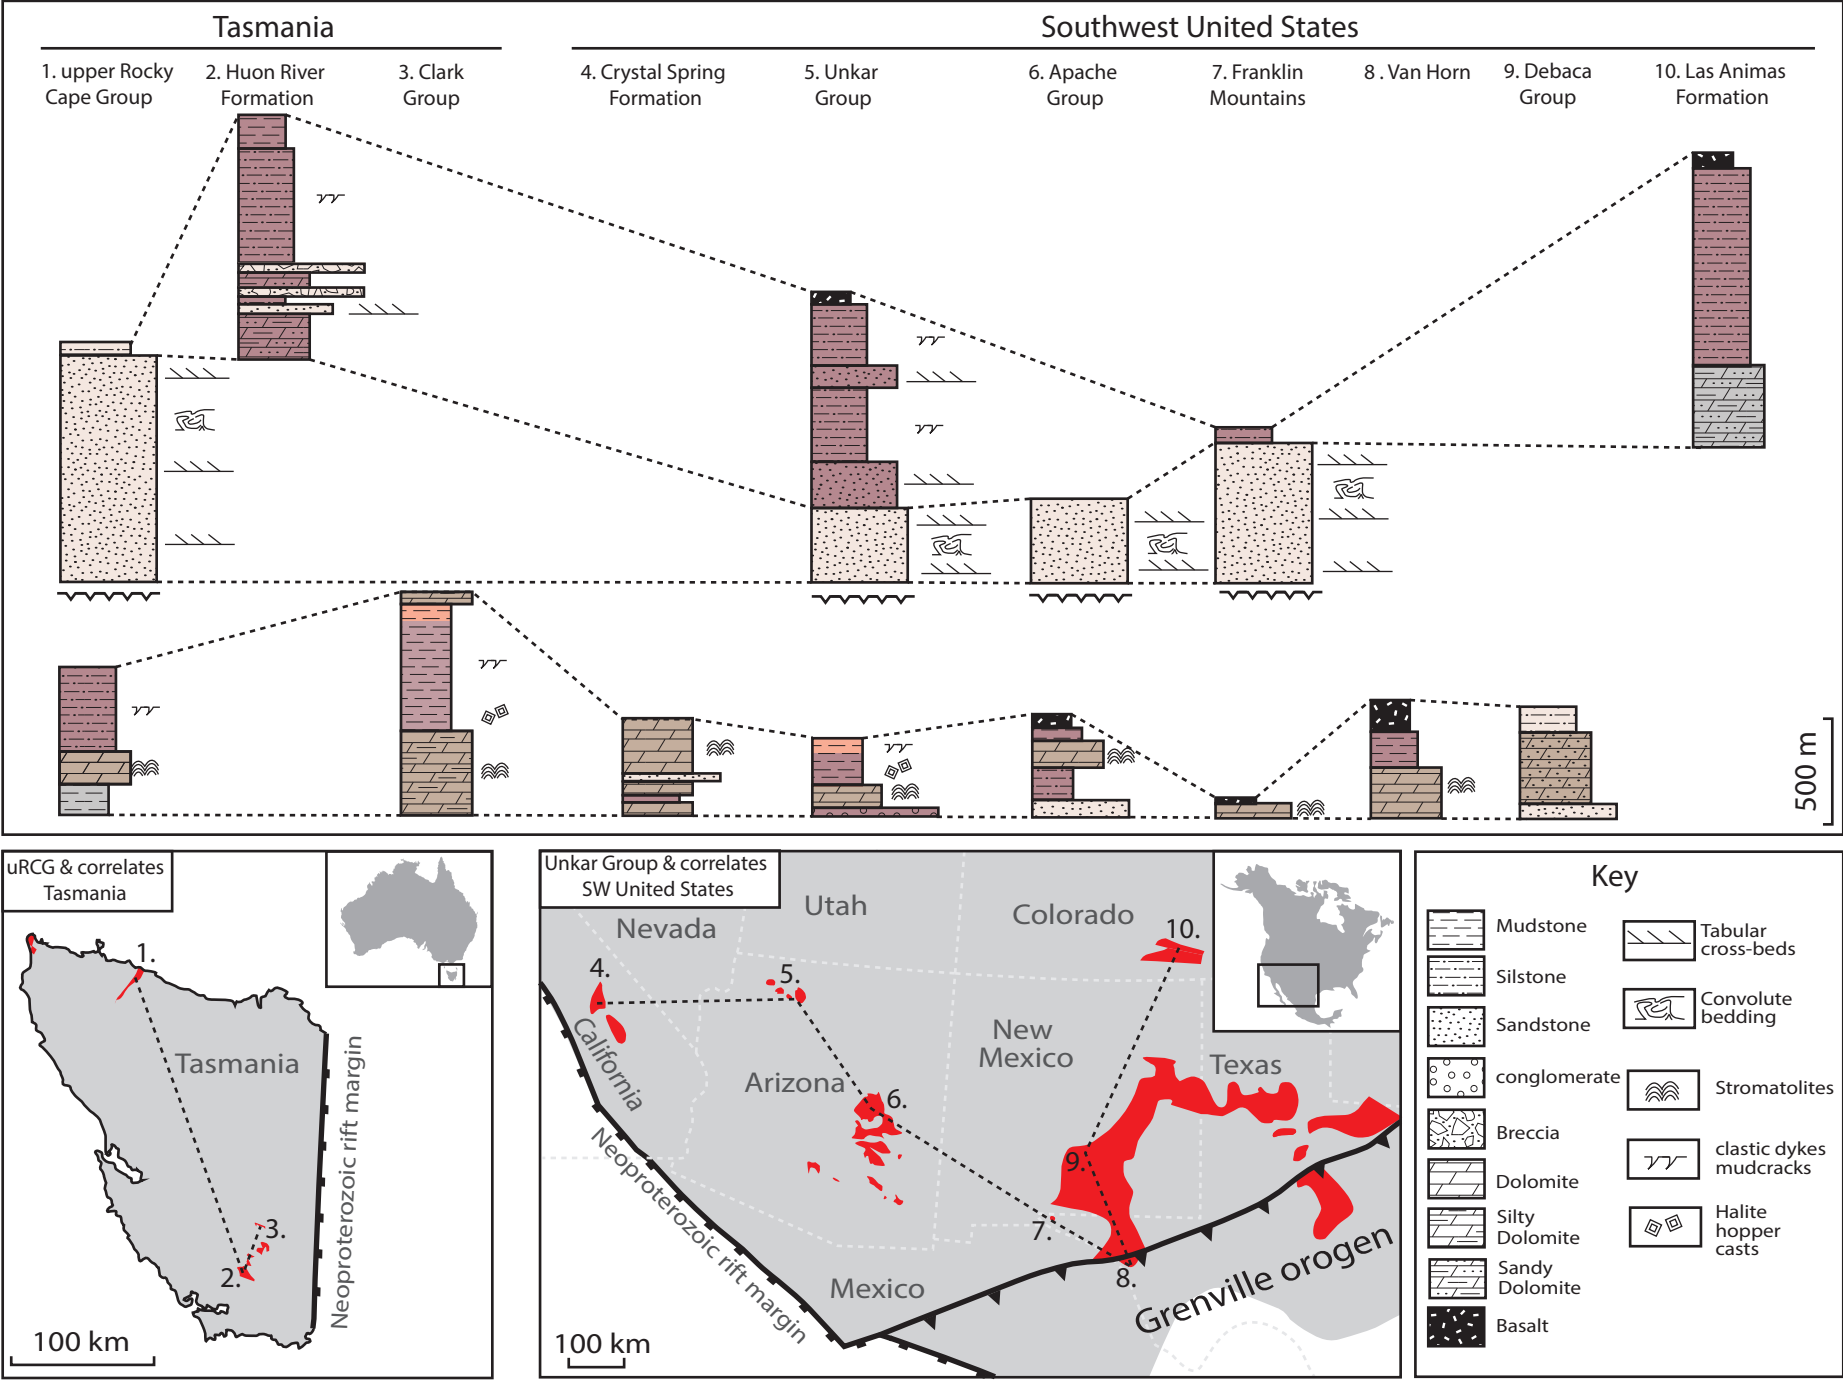

## upper Rocky Cape Group, northwest Tasmania

Togari  
Group  
( $<0.75$  Ga)

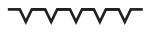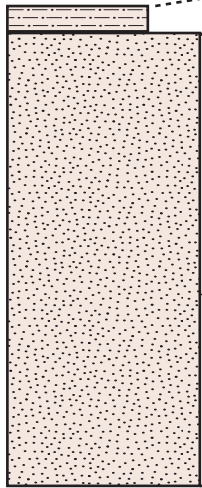

← 2015-326

← 2016-003

← 2015-329

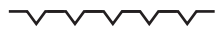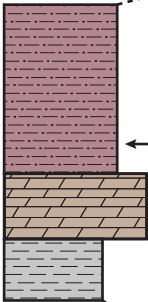

← 2016-004

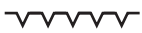

Detention  
subgroup  
(1.45–1.30 Ga)

| Name                                                                                                      | Age Constraints                                                                                               | Thickness      | Lithologies                                                                                                                                                  | Sedimentary Structures                                                                                                                                                                                                                                  | Depositional Environments                                                                        | References                                                      |
|-----------------------------------------------------------------------------------------------------------|---------------------------------------------------------------------------------------------------------------|----------------|--------------------------------------------------------------------------------------------------------------------------------------------------------------|---------------------------------------------------------------------------------------------------------------------------------------------------------------------------------------------------------------------------------------------------------|--------------------------------------------------------------------------------------------------|-----------------------------------------------------------------|
| Silstone Unit (unnamed)                                                                                   | Conformable with underlying Jacob Quartzite                                                                   | 60 m (minimum) | Thinly interbedded, light brown to tan micaceous quartz silstone, and quartz sandstone                                                                       | Planar lamination                                                                                                                                                                                                                                       | Shallow marine                                                                                   | Gee (1967)                                                      |
| Jacob Quartzite                                                                                           | Max: $1170 \pm 16$ Ma (Youngest detrital zircon population)<br><br>Min: $<750$ Ma from overlying Togari Group | 1100 m         | $<1$ m tabular beds of medium–coarse quartz arenite. tabular cross-bedding common throughout.<br><br>$<0.5$ m-thic beds of micaceous silstone in upper parts | Tabular cross-beds, convolute folding, ripple marks                                                                                                                                                                                                     | Shallow marine, high-energy, nearshore                                                           | Gee (1967)                                                      |
| Disconformity inferred from abrupt change in depositional setting and shift in detrital zircon provenance |                                                                                                               |                |                                                                                                                                                              |                                                                                                                                                                                                                                                         |                                                                                                  |                                                                 |
| Irby Siltstone                                                                                            | Max: $1258 \pm 16$ Ma (Youngest detrital zircon population)<br><br>Min: $<750$ Ma from overlying Togari Group | 680 m          | Black mudstone, maroon-grey-green silstone, quartz sandstone, dolomitic mudstone, dolomitic, silstone, dolostone, stromatolitic dolomite                     | Slump folds<br><br>sandstones: planar lamination, cross-bedding, climbing ripple lamination, ripple marks.<br><br>Silstone: clastic dykes, polygonal cracks<br><br>Dolomite: microbial lamination, stromatolites, ooids, peloids, molar tooth structure | Shallow marine, periodically subaerial, low energy possibly, a sub- tidal to supra-tidal mudflat | Gee (1967)<br><br>Calver & Baillie (1990)<br><br>Seymour (2002) |

Weld River  
Group  
(<0.75 Ga)  
~~~~~

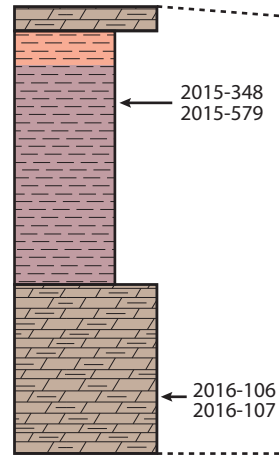

~~~~~  
Needles Quartzite  
(1.45-1.30 Ga)

## Clark Group, southern Tasmania

| Name               | Age Constraints                                                                                                                      | Thickness                         | Lithologies                                                                                                                                           | Sedimentary Structures                                                                                  | Depositional Environments                                                                       | References           |
|--------------------|--------------------------------------------------------------------------------------------------------------------------------------|-----------------------------------|-------------------------------------------------------------------------------------------------------------------------------------------------------|---------------------------------------------------------------------------------------------------------|-------------------------------------------------------------------------------------------------|----------------------|
| Humboldt Formation | <p>Max: <math>1329 \pm 20</math> Ma (Youngest detrital zircon population)</p> <p>Min: &lt;750 Ma from overlying Weld River Group</p> | (?)2000 m (disrupted by faulting) | Dolomitic mudstone, dolostone, stromatolitic dolomite, shale, red and orange mudstone, red siltstone, chert, flat-pebble conglomerate, quartz arenite | Clastic dykes, halite hopper casts, molar tooth structure, (?)anhydrite nodules, oolites, stromatolites | Shallow marine, periodically subaerial, low energy possibly a sub- tidal to supra-tidal mudflat | Calver et al. (2006) |

Weld River  
Group  
(<0.75 Ga)

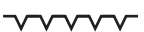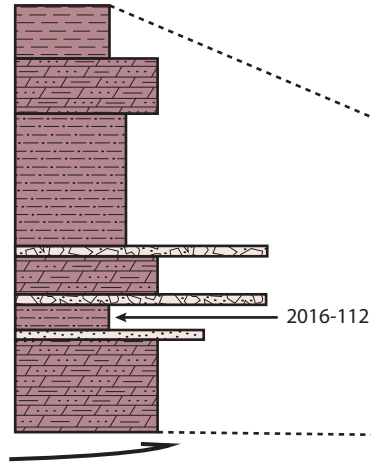

(Fault)

Tyennan  
Region  
(1.45–1.30 Ga)

## Huon River Formation, southern Tasmania

| Name                 | Age Constraints                                                                                                       | Thickness                            | Lithologies                                                                               | Sedimentary Structures                                     | Depositional Environments                                                                                                                                                  | References    |
|----------------------|-----------------------------------------------------------------------------------------------------------------------|--------------------------------------|-------------------------------------------------------------------------------------------|------------------------------------------------------------|----------------------------------------------------------------------------------------------------------------------------------------------------------------------------|---------------|
| Huon River Formation | Max: $1179 \pm 13$ Ma<br>(Youngest detrital zircon population)<br><br>Min: <750 Ma from<br>overlying Weld River Group | (?)3000 m<br>(disrupted by faulting) | red-purple-green mudstone and siltstone, quartz arenite, intra-clastic breccia, dolostone | Clastic dykes, cross-bedding, ripple marks, chert nodules. | Shallow marine, periodically subaerial, mostly low energy, possibly a sub- to supra-tidal mudflat. Abundant breccia beds in lower parts suggest syn-depositional tectonism | Calver (1990) |

Horse Thief  
Springs  
Formation  
(0.78–0.74 Ga)

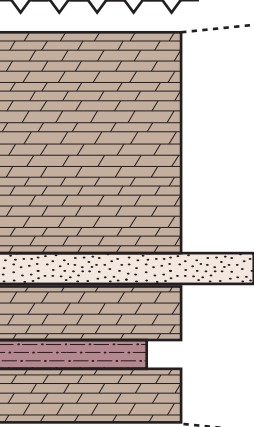

Lower Member  
of Crystal Spring  
Formation  
(ca. 1.32 Ga)

Crystal Spring Formation (Pahrump Group), Death Valley, California, USA

| Name          | Age Constraints                                                                                             | Thickness | Lithologies                                                                       | Sedimentary Structures | Depositional Environments | References                                                                                  |
|---------------|-------------------------------------------------------------------------------------------------------------|-----------|-----------------------------------------------------------------------------------|------------------------|---------------------------|---------------------------------------------------------------------------------------------|
| Middle Member | Max: ca. 1210 Ma<br>(Youngest detrital zircon population)<br><br>Min: 1069 ± 3 Ma<br>(cross-cutting diabse) | 135–400 m | Dolomitic limestone, stromatolitic dolomite, quartz sandstone, silstone, mudstone | Stromatolites          | Shallow marine            | Roberts (1982)<br>Heaman & Grotzinger (1992)<br>Mahon et al. (2014)<br>Mulder et al. (2017) |

## Unkar Group, Grand Canyon, Arizona, USA

Chuar Group  
(0.78–0.74 Ga)

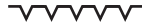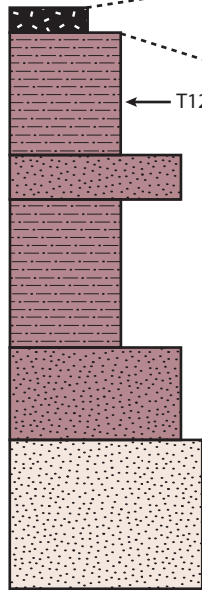

Yavapai Province  
1.80–1.70 Ga, 1.40 Ga

| Name                                                                                                      | Age Constraints                                                          | Thickness   | Lithologies                                                                                                                  | Sedimentary Structures                                                                                    | Depositional Environments                                                                                 | References                                                                                     |
|-----------------------------------------------------------------------------------------------------------|--------------------------------------------------------------------------|-------------|------------------------------------------------------------------------------------------------------------------------------|-----------------------------------------------------------------------------------------------------------|-----------------------------------------------------------------------------------------------------------|------------------------------------------------------------------------------------------------|
| Cardenas Basalt                                                                                           | 1104 Ma                                                                  | 300 m       | Basaltic lava flows and associated volcaniclastic rocks                                                                      |                                                                                                           | Intracratonic rift                                                                                        | Hendricks (1972)<br>Larson et al. (1994)<br>Weil et al. (2003)<br>Timmons et al. (2005)        |
| Dox Formation                                                                                             | Upper parts interlayered with 1104 Ma Cardenas Basalt                    | 1000–1500 m | Red and maroon quartz sandstone, arkose, micaceous sandstone, and mudstone                                                   | Tabular cross-bedding, parting lineations, troughs, clastic dykes, ripples marks                          | Deltaic and shallow marine                                                                                | Stevenson and Beus (1982)<br>Timmons et al. (2005)<br>Mulder et al. (2017)                     |
| Shinumo Sandstone                                                                                         | Max: $1184 \pm 5$ Ma (Youngest detrital zircon population)               | 200–300 m   | <2 m thick beds of medium-coarse quartz arenite, minor siltstone and mudstone<br><br>Tabular cross-bedding common throughout | Tabular cross-bedding, ripple marks, convolute folding                                                    | High energy shallow marine, supra-tidal mudflat, fluvial, deltaic                                         | Daneker (1975)<br>Middleton and Blakey (1998)<br>Timmons et al. (2005)<br>Mulder et al. (2017) |
| Disconformity inferred from abrupt change in depositional setting and shift in detrital zircon provenance |                                                                          |             |                                                                                                                              |                                                                                                           |                                                                                                           |                                                                                                |
| Hakatai Shale                                                                                             | Max: $1243 \pm 2$ Ma (Youngest detrital zircon population)               | 100–300 m   | Red and orange mudstone, arkose                                                                                              | Clastic dykes, polygonal cracks, ripple marks, halite hopper casts                                        | Sub- to supra-tidal mudflats, shallow marine                                                              | Reed (1976)<br>Timmons et al. (2005)<br>Bloch et al. (2006)<br>Mulder et al. (2017)            |
| Bass Formation                                                                                            | Lower parts interlayered with a felsic tuff dated at $1254.8 \pm 1.6$ Ma | 60–100 m    | Stromatolitic dolomite, quartz sandstone, arkose, siltstone, mudstone, felsic tuff, conglomerates in lower parts and at base | Tabular cross-bedding, ripple marks, clastic dykes, polygonal cracks, microbial lamination, stromatolites | Low energy shallow marine, sub- to supra-tidal mudflats, conglomerates record syn-depositional seismicity | Dalton (1972)<br>Timmons et al. (2005)<br>Mulder et al. (2017)                                 |

## Apache Group, eastern Arizona, USA

Bolsa Quartzite  
<0.50 Ga

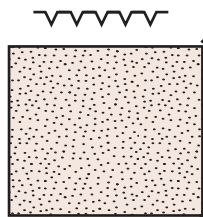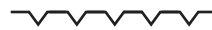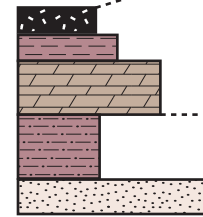

Pioneer Shale  
1.34 Ga

| Name                                                                                                 | Age Constraints                                                                                                      | Thickness          | Lithologies                                                                                         | Sedimentary Structures                                             | Depositional Environments                                                         | References                                                                                                   |
|------------------------------------------------------------------------------------------------------|----------------------------------------------------------------------------------------------------------------------|--------------------|-----------------------------------------------------------------------------------------------------|--------------------------------------------------------------------|-----------------------------------------------------------------------------------|--------------------------------------------------------------------------------------------------------------|
| Troy Quartzite                                                                                       | Max: $1259 \pm 1.7$ Ma<br>(Youngest detrital zircon population)<br><br>Min: 1080 Ma<br>(cross-cutting dolerite dyke) | 365 m<br>(minimum) | Tabular bedded arkose, quartz-arenite, siltstone, mudstone, conglomerate                            | Cross-bedding (tabular and trough), ripplemarks, convolute folding | Fluvial floodplain and braided stream complex, eolian, high energy shallow marine | Schride (1967)<br>Weiss (1986)<br>Burns (1987)<br>Wrucke (1989)<br>Mulder et al. (2017)                      |
| Unconformity inferred from, minor folding of Mescal Limestone, abrupt change in depositional setting |                                                                                                                      |                    |                                                                                                     |                                                                    |                                                                                   |                                                                                                              |
| Mescal Limestone                                                                                     | Min: 1080 Ma<br>(cross-cutting dolerite dyke)                                                                        | 75–130 m           | Laminated dolomite, stromatolitic dolomite, chert, conglomerate, mudstone, siltstone, basaltic lava | Stromatolites, slump folds                                         | Low energy shallow marine                                                         | Schride (1967)<br>McConnel (1975)<br>Bertrand-Sarfati and Awramik (1992)                                     |
| Dripping Springs Formation                                                                           | Max: $1256 \pm 3$ Ma<br>(Youngest detrital zircon population)                                                        | 170–215 m          | Arkose, siltstone, mudstone                                                                         | Tabular cross-bedding, scour and fill structures                   | sub- to supra-tidal mud flats, distal alluvial fans                               | Shride (1967)<br>Engel and Elmore (1990)<br>Middleton and Montgomery (2001)<br>Beraldi-Campesi et al. (2014) |



Debaka Group, Texas and New Mexico, USA

| 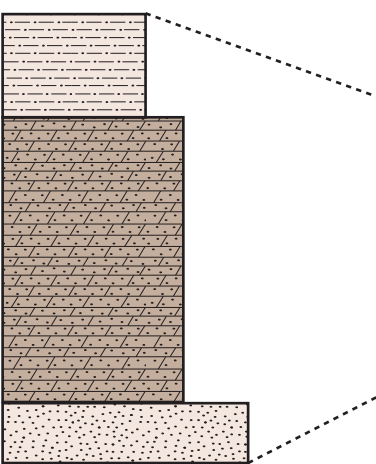 | Name         | Age Constraints                                                                                        | Thickness              | Lithologies                                                                                                                                       | Sedimentary Structures                                 | Depositional Environments | References                     |
|----------------------------------------------------------------------------------|--------------|--------------------------------------------------------------------------------------------------------|------------------------|---------------------------------------------------------------------------------------------------------------------------------------------------|--------------------------------------------------------|---------------------------|--------------------------------|
|                                                                                  | Debaka Group | Max: 1334 ± 52 Ma<br>(underlying basement)<br><br>Min: 1090 ± 4 Ma<br>(cross-cutting gabbro intrusive) | 500 m<br>(approximate) | Arkose, quartzite, micaceous siltstone, shale, quartz-rich dolomite, dolomitic quartzite, felsic volcaniclastic siltstone and sandstone, rhyolite | Tabular cross-bedding, clastic dykes, polygonal cracks | Shallow marine            | Pary (1961)<br>Amarante (2001) |

Franklin Mountains, western Texas, USA

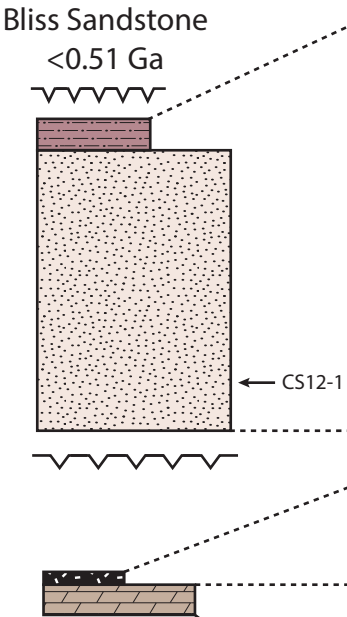

| Name                                                              | Age Constraints                                                                                                                                                                                                                       | Thickness       | Lithologies                                                                                                     | Sedimentary Structures                                | Depositional Environments                                                | References                                                     |
|-------------------------------------------------------------------|---------------------------------------------------------------------------------------------------------------------------------------------------------------------------------------------------------------------------------------|-----------------|-----------------------------------------------------------------------------------------------------------------|-------------------------------------------------------|--------------------------------------------------------------------------|----------------------------------------------------------------|
| Llanoria Formation                                                | Max: 1229 ± 3 Ma<br>(Youngest detrital zircon population from Mulder et al. 2017)<br><br>Max: 1130 Ma<br>(Youngest detrital zircon population from Spencer et al. 2014)<br><br>Min: 1120 ± 35 Ma<br>(cross-cutting Red Bluff Granite) | 739 m           | Tabular bedded quartz arenite, sub arkose, and mudstone<br><br>red-maroon sandstone and silstone in upper parts | Tabular cross-bedding, ripple marks, convulte folding | High-energy, tidally dominated shallow marine shelf. Upper parts deltaic | Seeley (1999)<br>Spencer et al. (2014)<br>Mulder et al. (2017) |
| Disconformity inferred from abrupt change in depositional setting |                                                                                                                                                                                                                                       |                 |                                                                                                                 |                                                       |                                                                          |                                                                |
| Mundy Breccia                                                     | Synchronous with Castner Marble                                                                                                                                                                                                       | 70 m            | Basaltic breccia, massive basalt, agglomerate                                                                   | Megablocks of Castner Marble                          | subaqueous gravity flows                                                 | Pittenger et al. (1994)                                        |
| Castner Marble                                                    | Interbedded with felsic tuffs dated at 1251 ± 47 Ma, 1260 ± 20 Ma, 1272 ± 5 Ma                                                                                                                                                        | 100 m (minimum) | Limestone, rhythmite, flat-pebble conglomerate, tuffaceous silstone, felsic tuffs                               | Stromatolites                                         | Sub-tidal to supra-tidal carbonate ramp                                  | Pittenger et al. (1994)                                        |

Van Horn, western Texas, USA

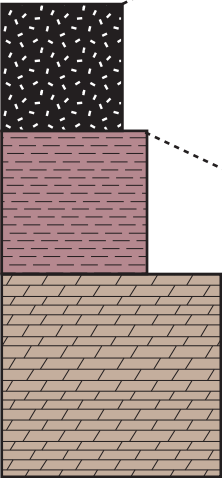

| Name                 | Age Constraints                                                                                                         | Thickness | Lithologies                                                                                                             | Sedimentary Structures             | Depositional Environments    | References                                                                                                      |
|----------------------|-------------------------------------------------------------------------------------------------------------------------|-----------|-------------------------------------------------------------------------------------------------------------------------|------------------------------------|------------------------------|-----------------------------------------------------------------------------------------------------------------|
| Tumbledown Formation | Max: 1243 ± 10 Ma (rhyolite clast in basal lithic arenite)<br><br>Min: <510 Ma disconformably overlying Bliss Sandstone | 168 m     | Volcanic lithic arenite, pillow basalt, basaltic breccia, agglomerate, and flows                                        |                                    | Intracontinental rift        | Soegaard and Callahan (1994)<br>Bickford et al. (2000)<br>Spencer et al.(2014)                                  |
| Allamoore Formation  | Interbedded with felsic tuffs dated at 1253 ± 15 Ma, 1256 ± 5 Ma, 1250 + 20/-27 Ma                                      | 324 m     | Interbedded dolostone and chert, talc rock, mudstone, felsic tuff, pillow basalt, basalt flows and hyaloclastic breccia | Stromatolites, halite hopper casts | Sub- to supra-tidal mudflats | King & Flawn (1953)<br>Edwards (1984)<br>Soegaard and Callahan (1994)<br>Roths (1993)<br>Bickford et al. (2000) |

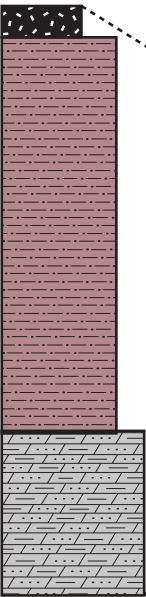

Las Animas Formation, Colorado, USA

| Name                 | Age Constraints                                  | Thickness | Lithologies                                                                                                  | Sedimentary Structures | Depositional Environments | References   |
|----------------------|--------------------------------------------------|-----------|--------------------------------------------------------------------------------------------------------------|------------------------|---------------------------|--------------|
| Las Animas Formation | Max: <i>ca.</i> 1400 Ma<br>(underlying basement) | 1700 m    | Greywacke, mudstone, chert, red-maroon arkose, dolomite, conglomerate, andesitic and basaltic lava and tuffs |                        | Shallow marine            | Tweto (1983) |

## References Cited

- Amarante, J.F.A., 2001. Characteristic of the basement rocks in the Mescalero 1 well, Guadalupe County, New Mexico (M.S. thesis). New Mexico Institute of Mining and Technology, Socorro, p. 73.
- Beraldi-Campesi, H., Farmer, J.D., Garcia-Pichel, F., 2014. Modern terrestrial sedimentary biostructures and their fossil analogs in mesoproterozoic subaerial deposits. *Palaio* 29, 45–54.
- Bertrand-Sarfati, J., Awramik, S.M., 1992. Stromatolites of the mescal limestone (Apache Group, Middle Proterozoic, Central Arizona) – taxonomy, biostratigraphy, and paleoenvironments. *Geol. Soc. Am. Bull.* 104, 1138–1155.
- Bickford, M.E., Soegaard, K., Nielsen, K.C., McLelland, J.M., 2000. Geology and geochronology of Grenville- age rocks in the Van Horn and Franklin Mountains area, west Texas; implications for the tectonic evolution of Laurentia during the Grenville. *Geol. Soc. Am. Bull.* 112, 1134–1148.
- Bloch, J., Timmons, M., Crossey, L.J., Gehrels, G.E., Karlstrom, K.E., 2006. Mudstone petrology of the Mesoproterozoic Unkar Group, Grand Canyon, U.S.A.: Provenance, weathering, and sediment transport on intracratonic Rodinia. *J. Sediment. Res.* 76, 1106–1119.
- Burns, B.A., 1987. The Sedimentology and Significance of a Middle Proterozoic braidplain; Chediski Sandstone Member of the Troy Quartzite, central Arizona (M.S. thesis). Northern Arizona University, Flagstaff, p. 143.
- Calver C. R.. 1990. Huon River Formation. In: Calver, C.R. , Turner, N.J. , McClenaghan, M.P. , McClenaghan, J. Pedder, Tasmania. 1:50,000 Sheet 80(8112S). Geological Survey of Tasmania.
- Calver, C. R., and Baillie, P. W., 1990. Early diagenetic concretions associated with intrastatal shrinkage cracks in an upper Proterozoic dolomite, Tasmania, Australia. *Journal of Sedimentary Petrology*, v. 60, 293–305.
- Calver, C. R., Forsyth, S. M., Everard, J. L., 2006. Geology of the Skeleton, Nevada, Weld and Picton 1:25 000 scale map sheets. *Tasmanian Geological Survey Record* 2006/4.
- Dalton Jr., R.O., 1972. Stratigraphy of the Bass Formation (Late Precambrian, Grand Canyon, Arizona) (M.S. thesis). Northern Arizona University, Flagstaff, p. 140.
- Daneker, T.M., 1975. Sedimentology of the Precambrian Shinumo Sandstone, Grand Canyon, Arizona (M.S. thesis). Northern Arizona University, Flagstaff, p. 195.
- Engel, M.H., Elmore, R.D., 1990. Assessments of the Hydrocarbon Generation Potential of Selected North American Proterozoic Rock Sequences. Progress Report for the U.S. Department of Energy.
- Gee, R.D., 1967. The tectonic evolution of the Rocky Cape Geanticline. PhD Thesis [unpub.], University of Tasmania.
- Heaman, L.M., Grotzinger, J.P., 1992. 1.08 Ga diabase sills in the Pahump Group, California: Implications for development of the Cordilleran miogeocline. *Geology* 20, 637–640.
- Hendricks, J.D., 1972. Younger Precambrian Basaltic Rocks of the Grand Canyon, Arizona (M.S. thesis). Northern Arizona University, Flagstaff, p. 122.
- Larson, E.E., Patterson, P.E., Mutschler, F.E., 1994. Lithology, chemistry, age, and origin of the Proterozoic Cardenas Basalt, Grand Canyon, Arizona. *Precambr. Res.* 65 (1–4), 255–276.
- Mahon, R.C., Dehler, C.M., Link, P.K., Karlstrom, K.E., Gehrels, G.E., 2014. Detrital zircon provenance and paleogeography of the Pahump Group and overlying strata, Death Valley, California. *Precambr. Res.* 251, 102–117.

McConnell, R.L., 1975. Biostratigraphy and depositional environment of algal stromatolites from the Mescal Limestone (Proterozoic) of central Arizona. *Precamb. Res.* 2, 317–328.

Middleton, L.T., Blakey, R.C., 1998. Seismically induced liquefaction in late Proterozoic strata, northern and central Arizona; implications for tectonic setting and regional correlations: *Geological Society of America Abstracts with Programs*, 30(2), p. 399.

Middleton, L.T., Montgomery, M.W., 2001. Sedimentary responses to changing tectonic patterns, Mesoproterozoic Apache Group/Troy Quartzite, Central Arizona, in Rocky Mountain (53rd) and South-Central (35th) Sections, Geological Society of America, Joint Annual Meeting; April 29–May 2, 2001; Albuquerque, New Mexico, Session No. 11.

Pittenger, M.A., Marsaglia, K.M., Bickford, M.E., 1994. Depositional history of the Middle Proterozoic Castner Marble and basal Mundy Breccia, Franklin Mountains, west Texas. *J. Sediment. Res.* B64, 282–297.

Pray, L.C., 1961. Geology of the Sacramento Mountains Escarpment, Otero County, New Mexico: New Mexico Bureau of Mines and Mineral Resources, Bulletin 35, 144 p.

Reed, V.S., 1976. Stratigraphy and Depositional Environment of the upper Precambrian Hakatai Shale, Grand Canyon, Arizona (M.S. thesis). Northern Arizona University, Flagstaff, p. 163.

Roberts, M.T., 1982. Depositional environments and tectonic setting of the Crystal Spring Formation, Death Valley, California. In: Cooper, J.D., Troxel, B.W., Wright, L.A. (Eds.), *Geology of Selected Areas in the San Bernardino Mountains, Western Mojave Desert, and Southern Great Basin, California: Volume and Guidebook for Field Trip no. 9, 78th Anniversary Meeting of Cordilleran Section*. Geological Society of America. Death Valley Publishing Company, Shoshone, CA, pp. 165–170.

Roths, P.J., 1993. Geochemical and geochronological studies of the Grenville-age (1,250–1,000 Ma) Allamoore and Hazel Formations, Hudspeth and Culberson counties, west Texas. In: Soegaard, K. et al. (Eds.), *Precambrian Geology of the Franklin Mountains and Van Horn Area, Trans-Pecos Texas*. Geological Society of America South Central Section, University of Texas, Dallas, Texas, pp. 11–35.

Seeley, J., 1999. Studies of the Proterozoic Tectonic Evolution of the Southwestern United States (Ph.D. thesis). University of Texas, El Paso, p. 321.

Seymour, D. B. compiler 2002. Marrawah West, Tasmania. Digital Geological Atlas 1:25000 Series Map Sheet. Mineral Resources Tasmania.

Shride, A.F., 1967. Younger Precambrian geology in southern Arizona. *U.S. Geol. Surv. Prof. Pap.* 566, 88.

Soegaard, K., Callahan, D.M., 1994. Late Middle Proterozoic Hazel Formation near Van Horn, trans-Pecos Texas: evidence for transpressive deformation in Grenvillian basement. *Geol. Soc. Am. Bull.* 106, 413–423.

Spencer, C.J., Prave, A.R., Cawood, P.A., Roberts, N.M.W., 2014. Detrital zircon geochronology of the Grenville/Llano foreland and basal Sauk Sequence in west Texas, USA. *Geol. Soc. Am. Bull.* 126, 1117–1128.

Stevenson, G.M., Beus, S.S., 1982. Stratigraphy and depositional setting of the upper precambrian dox formation in grand-canyon. *Geol. Soc. Am. Bull.* 93, 163–173.

Timmons, J.M., Karlstrom, K.E., Heizler, M.T., Bowring, S.A., Gehrels, G.E., Crossey, L. J., 2005. Tectonic inferences from the ca. 1255–1100 Ma Unkar Group and Nankoweap Formation, Grand Canyon: intracratonic deformation and basin formation during protracted Grenville orogenesis. *Geol. Soc. Am. Bull.* 117, 1573–1595.

Tweto, O., 1983. Las Animas Formation (Upper Precambrian) in the Subsurface of Southeastern Colorado U.S. Geological Survey Bulletin 1529-G, p. 20.

Weil, A.B., Geissman, J.W., Heizler, M., Van der Voo, R., 2003. Paleomagnetism of Middle Proterozoic mafic intrusions and Upper Proterozoic (Nankoweap) red beds from the Lower Grand Canyon Supergroup, Arizona. *Tectonophysics* 375, 199–220.

Weiss, G.C., 1986. A depositional Analysis of the Arkose Member (middle Proterozoic) of the Troy Quartzite in Central Arizona (M.S. thesis). Northern Arizona University, Flagstaff, p. 382.

Wrucke, C.T., 1989. The middle Proterozoic Apache Group, Troy Quartzite, and associated diabase of Arizona: *Arizona Geological Society Digest*, 17, pp. 239– 258.

## DR4: Palaeomagnetic data

Three GPlates files are supplied with this submission. In order to visualise the reconstruction, users need to download and install GPlates from [www.gplates.org](http://www.gplates.org), instructions on how to use GPlates are found at that website.

List and description of files:

### 1) Mulder\_2018\_polygons.gpml

Contains the polygons for the key components used in this reconstruction: Australia, Laurentia, Antarctica, Tasmania, East and West South Tasman Rise, Coats Land Block, Kalahari.

### 2) Mulder\_2018\_rotations.rot

Contains the Euler Pole rotations that describe the relative and absolute motions of the polygons used in the reconstruction. Rotation file is only valid from 1140 to 900 Ma. References to published Euler Poles are included in the rotation file.

### 3) Mulder\_2018\_palaeomagnetic\_data.gpml

Contains all the palaeomagnetic data listed in DM 4. To visualise data, users must:

- i) Load it into GPlates
- ii) Open the 'Layers Palette' (Control/Alt +L )
- iii) Expand the layer labeled 'Mulder\_2018\_palaeomagnetic\_data'
- iv) Click on 'Set VGP visibility...'
- v) Click on 'Show all VGPs at all times'

Palaeomagnetic data should then be visible for the age specific time.



Table D4: List of palaeomagnetic data from Australia and Laurentia around 1.4 Ga used to constrain reconstruction in Figure 3. sLat and sLon refer to the site latitude and longitude of the pole, pLat and pLon refer to the pole latitude and longitude. See supplementary material 5 for *GPlates* reconstruction files.

| Code  | Name                                               | Young Age (Ma) | Old Age (Ma) | sLat (°N) | sLon (°E) | pLat (°N) | pLon (°E) | a95 (°) | Reference                                                 |
|-------|----------------------------------------------------|----------------|--------------|-----------|-----------|-----------|-----------|---------|-----------------------------------------------------------|
| AUS1  | Mt. Isa dolerite dykes                             | 1139           | 1141         | -20.5     | 139.5     | 9.5       | 311.1     | 17.4    | Tanaka and Idnurm, 1994                                   |
| AUS2  | Bangemall Sills                                    | 1064           | 1076         | -23.5     | 116.5     | 33.9      | 95        | 8.3     | Wingate et al. 2002                                       |
| LAU1  | Abitibi Dyles                                      | 1139           | 1143         | 48        | -81       | 44.4      | 211.4     | 13.7    | Ernst and Buchan, 1993                                    |
| GRL1  | Giant gabbro dykes                                 | 1161           | 1165         | 61.2      | 311.7     | 42.3      | 226.1     | 9.4     | Piper, 1977; Buchan et al. 2001                           |
| GRL2  | South Qoroq intrusions                             | 1161           | 1165         | 61.2      | -45.4     | 41.8      | 215.9     | 13.1    | Piper, 1992                                               |
| GRL3  | NE-trending dyke swarm                             | 1155           | 1165         | 61.2      | -45.4     | 33.4      | 230.8     | 5.7     | Piper, 1992                                               |
| LAU2  | Osler Group (Upper Reversed)                       | 1103           | 1107         | 48.9      | -87.7     | 42.5      | 201.6     | 3.7     | Swanson-Hysell et al., 2014a                              |
| LAU3  | Mamainse Point (lower normal, upper reversed)      | 1099           | 1101         | 47        | -84.8     | 36.1      | 189.7     | 4.9     | Swanson-Hysell et al., 2014b                              |
| LAU4  | North Shore Volcanic Group (Upper SW sequence)     | 1095           | 1100         | 47        | -91.8     | 35.8      | 182.1     | 3.1     | Tauxe and Kodama (2009)                                   |
| LAU5  | Portage Lake Volcanics                             | 1090           | 1100         | 47.5      | -88.5     | 27.1      | 182       | 2.2     | Books 1972; Hnat et al., 2006                             |
| LAU6  | Schroeder-Lutsen basalts (no lower age constraint) | 1080           | 1091         | 47.5      | -91       | 27.1      | 187.8     | 3       | Fairchild et al. 2017; Tauxe and Kodama (2009)            |
| LAU7  | Lake Shore traps                                   | 1083           | 1087         | 47.5      | -88       | 23.1      | 186.4     | 4       | Fairchild et al. 2017                                     |
| LAU8  | Michipicoten Island Formation                      | 1083           | 1085         | 47.5      | -86       | 17        | 174.7     | 4.4     | Fairchild et al. 2017                                     |
| LAU9  | Nonesuch Shale (                                   | 1075           | 1085         | 46.5      | -89.3     | 7.3       | 174.7     | 3       | Symons et al. (2013); Henry et al. (1977)                 |
| LAU10 | Freda Sandstone (no upper age constraint)          | 1070           | 1080         | 46.5      | -88       | 2.2       | 179       | 5.9     | Henry et al. 1977                                         |
| LAU11 | Jacobsville Sanstone (no lower age constraint)     | 1060           | 1065         | 46.5      | -88       | -10       | 184       | 4.3     | Roy and Robertson (1978)                                  |
| CLB1  | Coats Land Nunataks                                | 1103           | 1109         | -78       | -35       | 23        | 80        | 7       | Gose et al., 1997                                         |
| KAL1  | Umkondo Ingeous Province                           | 1107           | 1113         | -25       | 29        | -66       | -143      | 3       | Gose et al., 2006                                         |
| KAL2  | Central Namaqua Belt                               | 1030           | 1000         | -30       | 20        | -8        | 150       | 10      | Onstott et al., 1986, <i>cited in Jacobs et al., 2008</i> |
| KAL3  | Port Edward Pluton                                 | 1009           | 999          | -31       | 30        | 7         | 148       | 4       | Gose et al., 2004                                         |
| LAU12 | Haliburton Intrusions                              | 1030           | 1000         | 45        | -77       | -36       | 143       | 6       | Warnock et al., 2000                                      |

References:

- Books, K.G., 1972. Paleomagnetism of some Lake Superior Keweenawan rocks. In *Geological Survey professional paper* (v. 760). US Government Printing Office.
- Buchan, K.L., Ernst, R.E., Hamilton, M.A., Mertanen, S., Pesonen, L.J. and Elming, S.Å., 2001. Rodinia: the evidence from integrated palaeomagnetism and U–Pb geochronology. *Precambrian Research*, 110(1-4), pp.9-32, doi: [10.1016/S0301-9268\(01\)00178-4](https://doi.org/10.1016/S0301-9268(01)00178-4)
- Ernst, R.E. and Buchan, K.L., 1993. Paleomagnetism of the Abitibi dyke swarm, southern Superior Province, and implications for the Logan Loop. *Canadian Journal of Earth Sciences*, 30(9), pp.1886-1897, doi: [10.1139/e93-167](https://doi.org/10.1139/e93-167)
- Fairchild, L.M., Swanson-Hysell, N.L., Ramezani, J., Sprain, C.J. and Bowring, S.A., 2017. The end of Midcontinent Rift magmatism and the paleogeography of Laurentia. *Lithosphere*, 9(1), pp.117-133.
- Gose, W.A., Helper, M.A., Connelly, J.N., Hutson, F.E. and Dalziel, I.W., 1997. Paleomagnetic data and U–Pb isotopic age determinations from Coats Land, Antarctica: Implications for late Proterozoic plate reconstructions. *Journal of Geophysical Research: Solid Earth*, 102(B4), pp.7887-7902.
- Gose, W.A., Johnston, S.T. and Thomas, R.J., 2004. Age of magnetization of Mesoproterozoic rocks from the Natal sector of the Namaqua-Natal belt, South Africa. *Journal of African Earth Sciences*, 40(3-4), pp.137-145.
- Gose, W.A., Hanson, R.E., Dalziel, I.W., Pancake, J.A. and Seidel, E.K., 2006. Paleomagnetism of the 1.1 Ga Umkondo large igneous province in southern Africa. *Journal of Geophysical Research: Solid Earth*, 111(B9).
- Henry, S.G., Mauk, F.J. and der Voo, R.V., 1977. Paleomagnetism of the upper Keweenawan sediments: the Nonesuch Shale and Freda Sandstone. *Canadian Journal of Earth Sciences*, 14(5), pp.1128-1138.
- Hnat, J.S., Van der Pluijm, B.A. and Van der Voo, R., 2006. Primary curvature in the Mid-Continent Rift: Paleomagnetism of the Portage Lake Volcanics (northern Michigan, USA). *Tectonophysics*, 425(1-4), pp.71-82.
- Jacobs, J., Pisarevsky, S., Thomas, R.J. and Becker, T., 2008. The Kalahari Craton during the assembly and dispersal of Rodinia. *Precambrian Research*, 160(1-2), pp.142-158.
- Onstott, T.C., Hargraves, R.B., Joubert, P., 1986. Constraints on the tectonic evolution of the Namaqua Province II: reconnaissance palaeomagnetic and <sup>40</sup>Ar/<sup>39</sup>Ar results from the Namaqua Province and the Kheis Belt. *Transactions of the Geological Society of South Africa*, 89, 143–170.
- Piper, J.D.A., 1992. The palaeomagnetism of major (Middle Proterozoic) igneous complexes, South Greenland and the Gardar apparent polar wander track. *Precambrian Research*, 54(2-4), pp.153-172, doi: [10.1016/0301-9268\(92\)90068-Y](https://doi.org/10.1016/0301-9268(92)90068-Y)
- Piper, J.D.A. and Stearn, J.E.F., 1977. Palaeomagnetism of the dyke swarms of the Gardar Igneous Province, South Greenland. *Physics of the Earth and Planetary Interiors*, 14(4), pp.345-358, doi: [10.1016/0031-9201\(77\)90167-4](https://doi.org/10.1016/0031-9201(77)90167-4)
- Roy, J.L. and Robertson, W.A., 1978. Paleomagnetism of the Jacobsville Formation and the apparent polar path for the interval– 1100 to– 670 my for North America. *Journal of Geophysical Research: Solid Earth*, 83(B3), pp.1289-1304.
- Swanson-Hysell, N.L., Vaughan, A.A., Mustain, M.R. and Asp, K.E., 2014a. Confirmation of progressive plate motion during the Midcontinent Rift's early magmatic stage from the Osler Volcanic Group, Ontario, Canada. *Geochemistry, Geophysics, Geosystems*, 15(5), pp.2039-2047.
- Swanson-Hysell, N.L., Burgess, S.D., Maloof, A.C. and Bowring, S.A., 2014b. Magmatic activity and plate motion during the latent stage of Midcontinent Rift development. *Geology*, 42(6), pp.475-478.

Symons, D.T.A., Kawasaki, K. and Diehl, J.F., 2013. Age and genesis of the White Pine stratiform copper mineralization, northern Michigan, USA, from paleomagnetism. *Geofluids*, 13(2), pp.112-126.

Tanaka, H. and Idnurm, M., 1994. Palaeomagnetism of Proterozoic mafic intrusions and host rocks of the Mount Isa Inlier, Australia: revisited. *Precambrian Research*, 69(1-4), pp.241-258, doi: [10.1016/0301-9268\(94\)90089-2](https://doi.org/10.1016/0301-9268(94)90089-2)

Tauxe, L. and Kodama, K.P., 2009. Paleosecular variation models for ancient times: Clues from Keweenawan lava flows. *Physics of the Earth and Planetary Interiors*, 177(1), pp.31-45.

Warnock, A.C., Kodama, K.P. and Zeitler, P.K., 2000. Using thermochronometry and low-temperature demagnetization to accurately date Precambrian paleomagnetic poles. *Journal of Geophysical Research: Solid Earth*, 105(B8), pp.19435-19453.

Wingate, M.T., Pisarevsky, S.A. and Evans, D.A., 2002. Rodinia connections between Australia and Laurentia: no SWEAT, no AUSWUS?. *Terra Nova*, 14(2), pp.121-128.

# DR5: Interpreted affinity of crustal terranes in East Antarctica and geological evidence for 1.07—0.90 Ga plate boundary

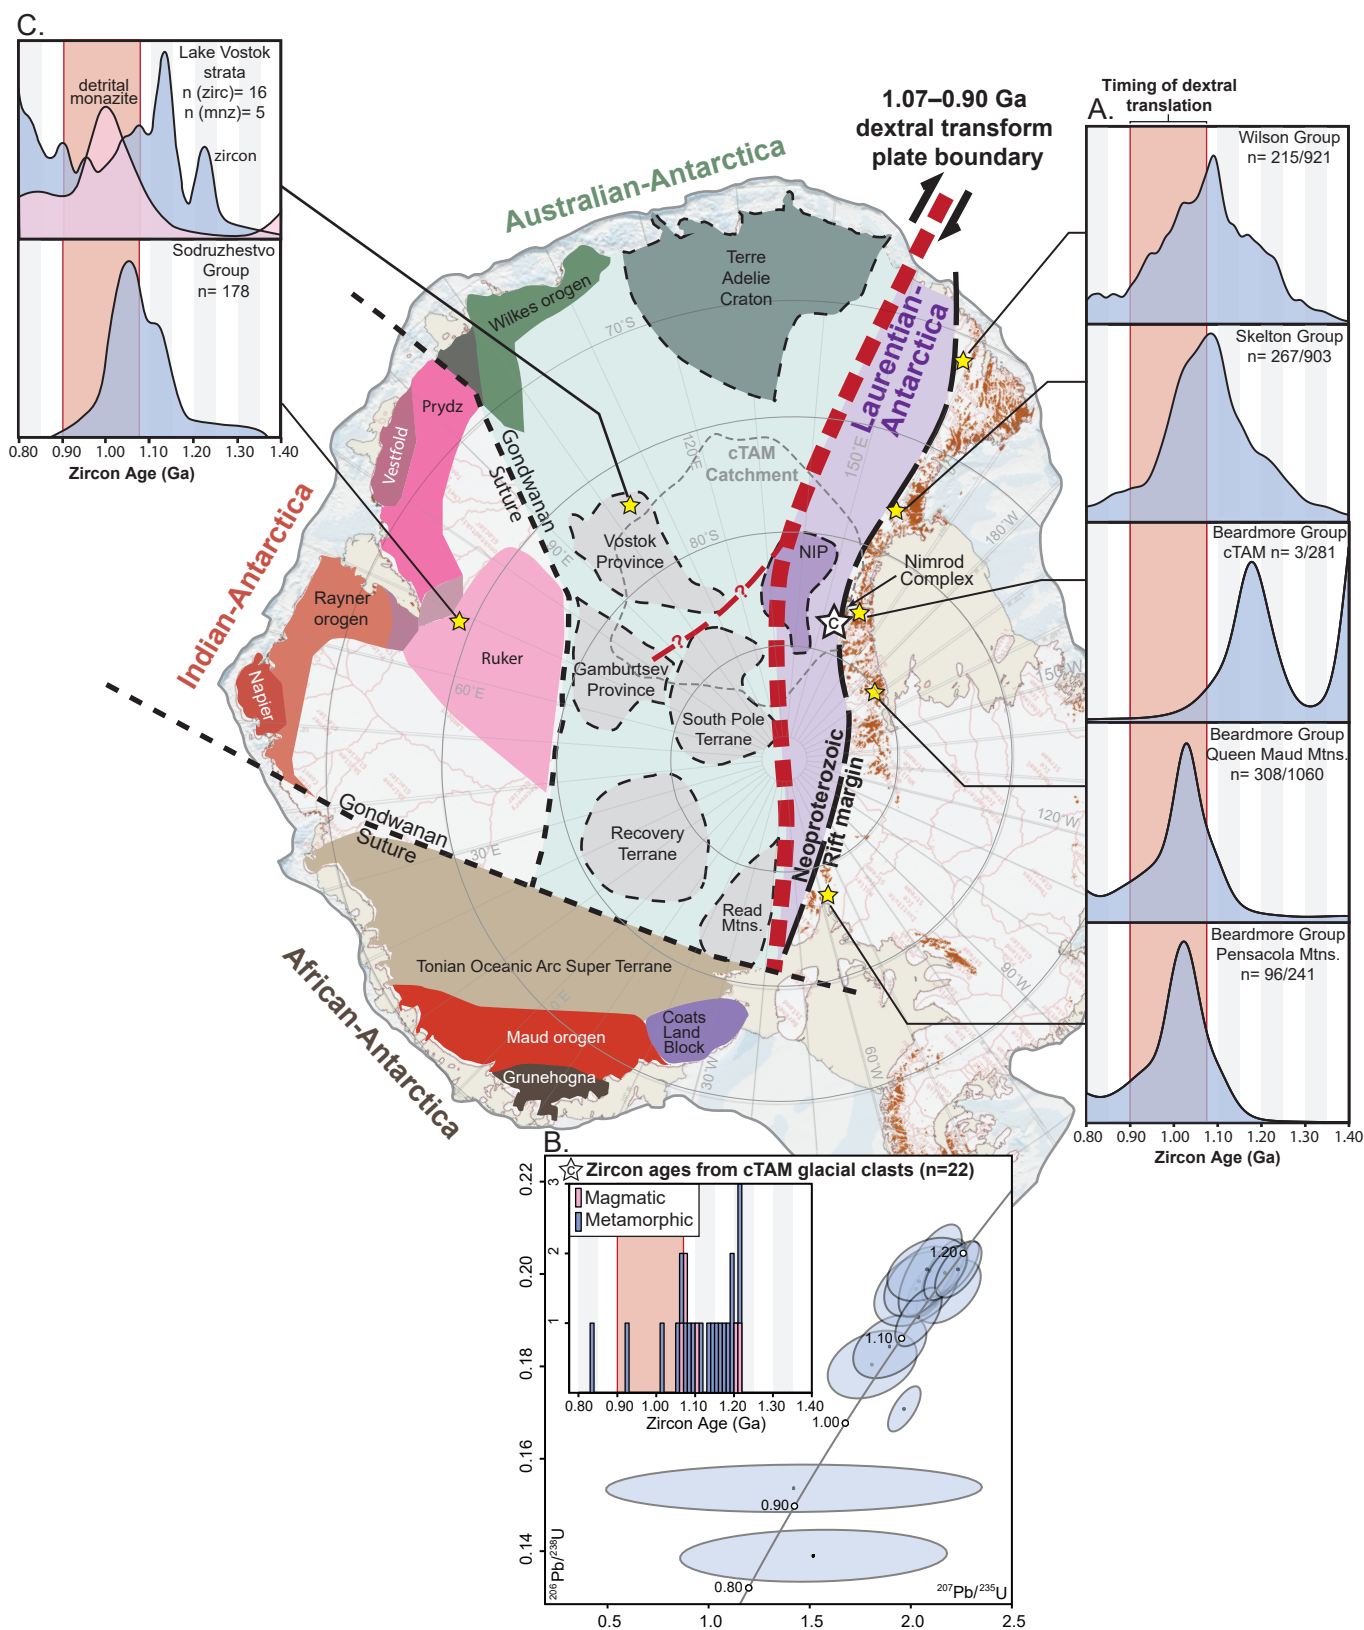

### Figure DR5: Interpreted affinity of crustal terranes in East Antarctica and geological evidence for 1.07—0.90 Ga plate boundary

Affinity of terranes in East Antarctica are color-coded as follows: Australian (green shades) modified from Fitzsimons (2003), Goodge and Finn (2010), Aitken et al. (2014), Fanning and Goodge (2015), and Daczko et al. (2018); Indian (pink and red shades) from Flowerdew et al. (2013) and Aitken et al. (2014); African (brown shades) from Jacobs et al. (2015). The distribution of Laurentian crust (purple shades) is from this study with the extent of the Nimrod Igneous Province (NIP) and Coats Land Block from Goodge and Finn (2010) and Loewy et al. (2011), respectively. See accompanying references for detailed discussions supporting the affinity of the East Antarctic terranes. Ice-covered geophysically defined regions of inferred Archean/Paleoproterozoic crust of uncertain affinity are shown in grey with dashed outlines after Ferraccioli et al. (2011). We place these terranes within Australo-Antarctica to produce an approximately linear plate boundary between Australian and Laurentian crust, which facilitates simple dextral plate motion at 1.07—0.90 Ga (see also Figure 3B and C). The thin dashed red line shows an alternative extension of the 1.07—0.90 Ga plate boundary into a possible late Mesoproterozoic orogen within the Gamburtsev Province (Ferraccioli et al., 2011). Note that crust of Indian and African affinity was incorporated into East Antarctica during the Latest Neoproterozoic—early Paleozoic assembly of Gondwana (e.g., Fitzsimmons, 2003; Boger, 2011; Harley et al., 2013) and is not shown in the Figure 3 reconstructions of Rodinia. Base map source: <https://www.add.scar.org/>.

Geological evidence for the 1.07—0.90 Ga plate boundary includes: (Panel A) Abundant 1.07—0.90 Ga detrital zircons in Neoproterozoic strata in the Transantarctic Mountains, n= number of 1.07—0.90 Ga ages out of total concordant age population. (Panel B) Metamorphic zircon rims and Pb-loss trends from glacial clasts in the central Transantarctic Mountains (white star labelled ‘C’). (Panel C) Common 1.07—0.90 Ga detrital zircon from the Neoproterozoic Sodruzhestvo Group in the Lambert Glacier, and detrital zircon and monazite from undated sedimentary rocks at Lake Vostok. References for zircon data are compiled in Table DR5-1.

**Table DR5-1: Sources of zircon age data<sup>1</sup>**

| Unit                      | Location                         | Reference                                                         |
|---------------------------|----------------------------------|-------------------------------------------------------------------|
| Wilson Group              | Northern Victoria Land           | Paulsen et al. (2016), Estrada et al. (2016)                      |
| Skelton Group             | Southern Victoria Land           | Goodge et al. (2004), Paulsen et al. 2017                         |
| Beardmore Group           | Central Transantarctic Mountains | Goodge et al. (2004), Goodge et al. (2002), Paulsen et al. (2017) |
| Beardmore Group           | Queen Maud Mountains             | Paulsen et al. (2017)                                             |
| Beardmore Group           | Pensacola Mountains              | Goodge et al. (2004), Paulsen et al. (2017)                       |
| Glacial Clasts            | central Transantarctic Mountains | Goodge et al. (2010), Goodge et al. (2017)                        |
| Sodruzhestvo Group        | Lambert Glacier                  | Phillips et al. (2006)                                            |
| Unnamed Sedimentary Rocks | Lake Vostok                      | Leitchenkov et al. (2011)                                         |

<sup>1</sup>Age calculations and discordance filters for zircon data follow Spencer et al. (2016).

## REFERENCES

- Aitken, A.R.A., Young, D.A., Ferraccioli, F., Betts, P.G., Greenbaum, J.S., Richter, T.G., Roberts, J.L., Blankenship, D.D., and Siegert, M.J., 2014, The subglacial geology of Wilkes Land, East Antarctica. *Geophysical Research Letters* v. 41, p. 2390–2400
- Boger, S.D., 2011. Antarctica — Before and after Gondwana. *Gondwana Research* v. 19 (2), p. 335–371.
- Harley, S.L., Fitzsimons, I.C.W., Zhao, Y., 2013. Antarctica and supercontinent evolution: historical perspectives, recent advances and unresolved issues. In: Harley, S.L., Fitzsimons, I.C.W. and Zhao, Y. (Eds.), *Antarctica and Supercontinent Evolution*, Geological Society, London, Special Publications v. 383, p. 1–34
- Daczko, N. R., Halpin, J. A., Fitzsimons, I. C. W., and Wittaker, J. M., 2018, A cryptic Gondwana-forming orogen located in Antarctica. *Scientific Reports* v. 8:8371
- Estrada, S., Läufer, A., Eckelmann, K., Hofmann, M., Gärtner, A., and Linnemann, U., 2016, Continuous Neoproterozoic to Ordovician sedimentation at the East Gondwana margin — Implications from detrital zircons of the Ross Orogen in northern Victoria Land, Antarctica. *Gondwana Research* v. 37, p. 426–448
- Fanning, C. M., and Goodge, J. W., 2015, Role of the Nimrod Group, Central Transantarctic Mountains, in the Mawson Continent. XII International Symposium on Antarctic Earth Sciences Abstracts. p. 21–22
- Ferraccioli, F., Finn, C.A., Jordan, T.A., Bell, R.E., Anderson, L.M., and Damaske, D., 2011, East Antarctic rifting triggers uplift of the Gamburtsev Mountains. *Nature* v. 479, p.388–392
- Fitzsimons, I.C.W., 2003. Proterozoic basement provinces of southern and southwestern Australia, and their correlation with Antarctica. In: Yoshida, M., Windley, B.F., and Dasgupta, S. (Eds.), *Proterozoic East Gondwana; supercontinent assembly and breakup*: London, Geological Society of London Special Publications v. 206, p. 93–130
- Flowerdew, M. J., Tyrrell, S., Boger, S. D., Fitzsimons, I. C. W., Harley, S. L., Mikhalsky, E. V., and Vaughn, A. P. M., 2013, Pb isotopic domains from the Indian Ocean sector of Antarctica: implications for past Antarctica-India connections. In: Harley, S. L., Fitzsimons, I. C. W. and Zhao, Y. (Eds.) 2013. *Antarctica and Supercontinent Evolution*. Geological Society, London, Special Publications v. 383, p. 59–72
- Goodge, J.W., Myrow, P., Williams, I.S., and Bowring, S., 2002, Age and provenance of the Beardmore Group, Antarctica: constraints on Rodinia supercontinent breakup. *Journal of Geology* v. 110, p. 393–406
- Goodge, J.W., Williams, I.S., Myrow, P., 2004. Provenance of Neoproterozoic and lower Paleozoic siliciclastic rocks of the central Ross Orogen, Antarctica: Detrital record of rift-, passive- and active-margin sedimentation. *Geological Society of America Bulletin* v. 116, p. 1253–1279
- Goodge, J.W., Fanning, C.M., Brecke, D.M., Licht, K.J., and Palmer, E.F., 2010, Continuation of the Laurentian Grenville province in western East Antarctica. *Journal of Geology* v. 118, p. 601–619
- Goodge, J.W., Fanning, M. C., Fisher, C. M., and Vervoort, J. D., 2017, Proterozoic crustal evolution of central East Antarctica: Age and isotopic evidence from glacial igneous clasts, and links with Australia and Laurentia. *Precambrian Research* v. 299, p. 151–176
- Harley, S.L., Fitzsimons, I.C.W., and Zhao, Y., 2013, Antarctica and supercontinent evolution: historical perspectives, recent advances and unresolved issues. In: Harley, S.L., Fitzsimons, I.C.W. and Zhao, Y. (Eds.), *Antarctica and Supercontinent Evolution*. Geological Society London Special Publications v. 383, p. 1–34.
- Jacobs, J., Elburg, M., Läufer, A.L., Kleinhanns, I.C., Henjes-Kunst, F., Estrada, S., Ruppel, A.S., Damaske, D., Montero, P., and Bea, F., 2015, Two distinct Late Mesoproterozoic/Early Neoproterozoic basement provinces in central/eastern Dronning Maud Land, East Antarctica: the missing link, 15–21°E. *Precambrian Research* v. 265, p. 249–272

Leitchenkov, G.L., Belyatsky, B.V., Rodionov, N.V., and Sergeev, S.A., 2007, Insight into the geology of the East Antarctic hinterland: a study of mineral inclusions from ice cores of the Lake Vostok borehole. In: Cooper, A.K., Raymond, C.R. (Eds.), Online Proceedings of the 10th ISAES, USGS Openfile Report 2007–1047, Short Research Paper 014

Loewy, S.L., Dalziel, I.W.D., Pisarevsky, S.A., Connelly, J.N., Tait, J., Hanson, R.E., and Bullen, D., 2011. Coats Land crustal block, East Antarctica: a tectonic tracer for Laurentia? *Geology* v. 39, p. 859–862

Paulsen, T. S., Deering, C., Sliwinski, J., Bachmann, O. and Guillong, M., 2016, Detrital zircon ages from the Ross Supergroup, north Victoria Land, Antarctica: Implications for the tectonostratigraphic evolution of the Pacific-Gondwana margin. *Gondwana Research* v. 35, p. 79–96

Paulsen, T. S., Deering, C., Sliwinski, J., Bachmann, O. and Guillong, M., 2017, Evidence for a spike in mantle carbon outgassing during the Ediacaran period. *Nature Geoscience* v. 10, p. 930—934

Phillips, G., Wilson, C.J.L., Campbell, I.H., and Allen, C.M., 2006. U–Th–Pb detrital zircon geochronology from the southern Prince Charles Mountains, East Antarctica—defining the Archaean to Neoproterozoic Ruker Province. *Precambrian Research* v. 148, p. 292–306

Spencer, C. J., Kirkland, C. L., and Taylor, R. J. M., 2016. Strategies towards statistically robust interpretations of in situ U–Pb zircon geochronology. *Geoscience Frontiers* v. 7, p. 581–589
