# Supplementary material
Source: publisher figshare collection journal article supplement (https://gsapubs.figshare.com/articles/dataset/_/12540188)
Supplement: Supplementary file 1 [file 1]

## Sheet: uRCG
Jacob Quartzite
LA-ICPMS (University of Tasmania)
					Apparent ages (Ma)
Analysis		207Pb*	±1σ	206Pb*	±1σ	206Pb*	±1σ		Overlaps 1:1 concordance at 2s?	6/8 vs 7/6 conc. (%)		Preffered age (1500Ma switch)	±1σ
		235U	(Ma)	238U*	(Ma)	207Pb*	(Ma)					(Ma)	(Ma)
Sample 2015-329: Anne Bay, -40.67205, 144.74102
2015-329-043		1122	26	1054	25	1250	52		concordant	84.32		1054	25
2015-329-025		1246	22	1203	27	1321	36		concordant	91.0674		1203	27
2015-329-095		1223	18	1207	22	1249	33		concordant	96.6373		1207	22
2015-329-088		1220	16	1214	21	1230	24		concordant	98.6992		1214	21
2015-329-071		1227	22	1215	23	1250	43		concordant	97.2		1215	23
2015-329-055		1275	32	1218	37	1370	53		concordant	88.9051		1218	37
2015-329-023		1227	17	1235	22	1213	25		concordant	101.814		1235	22
2015-329-085		1242	23	1254	24	1220	44		concordant	102.787		1254	24
2015-329-050		1356	17	1370	24	1335	23		concordant	102.622		1370	24
2015-329-096		1380	18	1386	25	1371	27		concordant	101.094		1386	25
2015-329-079		1410	20	1400	26	1423	30		concordant	98.3837		1400	26
2015-329-002		1464	26	1400	32	1557	39		concordant	89.9165		1400	32
2015-329-084		1462	39	1430	39	1510	76		concordant	94.702		1430	39
2015-329-039		1425	20	1435	27	1408	30		concordant	101.918		1435	27
2015-329-044		1424	20	1436	27	1405	30		concordant	102.206		1436	27
2015-329-092		1458	18	1462	26	1452	21		concordant	100.689		1462	26
2015-329-075		1487	19	1489	27	1485	25		concordant	100.269		1489	27
2015-329-010		1501	21	1492	28	1513	32		concordant	98.612		1492	28
2015-329-056		1498	19	1498	27	1499	24		concordant	99.9333		1498	27
2015-329-098		1609	49	1610	53	1610	90		concordant	100		1610	90
2015-329-066		1595	19	1572	29	1625	19		concordant	96.7385		1625	19
2015-329-057		1631	20	1636	29	1625	26		concordant	100.677		1625	26
2015-329-089		1625	28	1597	41	1660	33		concordant	96.2048		1660	33
2015-329-042		1664	18	1635	28	1701	18		concordant	96.1199		1701	18
2015-329-069		1737	20	1731	31	1743	24		concordant	99.3115		1743	24
2015-329-005		1778	18	1796	31	1757	17		concordant	102.22		1757	17
2015-329-100		1796	19	1829	32	1758	21		concordant	104.039		1758	21
2015-329-051		1769	21	1773	32	1763	24		concordant	100.567		1763	24
2015-329-011		1776	23	1785	34	1763	31		concordant	101.248		1763	31
2015-329-022		1778	28	1784	45	1770	30		concordant	100.791		1770	30
2015-329-014		1802	21	1829	33	1770	27		concordant	103.333		1770	27
2015-329-030		1733	26	1700	42	1772	27		concordant	95.9368		1772	27
2015-329-012		1753	19	1737	32	1772	14		concordant	98.0248		1772	14
2015-329-045		1784	19	1794	31	1772	20		concordant	101.242		1772	20
2015-329-015		1799	20	1821	32	1772	24		concordant	102.765		1772	24
2015-329-086		1761	21	1747	35	1777	20		concordant	98.3118		1777	20
2015-329-077		1787	20	1794	32	1777	20		concordant	100.957		1777	20
2015-329-081		1798	31	1815	41	1777	47		concordant	102.138		1777	47
2015-329-091		1768	21	1757	31	1779	27		concordant	98.7634		1779	27
2015-329-058		1741	21	1706	32	1782	24		concordant	95.7351		1782	24
2015-329-007		1758	22	1733	33	1785	27		concordant	97.0868		1785	27
2015-329-006		1811	20	1833	32	1785	24		concordant	102.689		1785	24
2015-329-087		1796	18	1802	30	1789	17		concordant	100.727		1789	17
2015-329-068		1803	23	1815	36	1790	27		concordant	101.397		1790	27
2015-329-080		1808	21	1823	33	1790	23		concordant	101.844		1790	23
2015-329-090		1821	19	1848	32	1790	20		concordant	103.24		1790	20
2015-329-031b		1819	20	1836	32	1799	20		concordant	102.057		1799	20
2015-329-082		1821	23	1840	36	1799	30		concordant	102.279		1799	30
2015-329-073		1766	23	1737	35	1800	27		concordant	96.5		1800	27
2015-329-099		1785	21	1773	32	1800	27		concordant	98.5		1800	27
2015-329-076		1790	26	1779	40	1802	30		concordant	98.7236		1802	30
2015-329-037		1811	20	1816	31	1805	23		concordant	100.609		1805	23
2015-329-048		1844	22	1870	37	1815	26		concordant	103.03		1815	26
2015-329-021		1859	25	1882	38	1833	36		concordant	102.673		1833	36
2015-329-062		1842	19	1847	32	1838	20		concordant	100.49		1838	20
2015-329-018		1862	20	1879	33	1841	20		concordant	102.064		1841	20
2015-329-008		1869	18	1891	31	1844	16		concordant	102.549		1844	16
2015-329-067		1869	20	1891	33	1846	23		concordant	102.438		1846	23
2015-329-001		1842	24	1819	34	1866	32		concordant	97.4812		1866	32
2015-329-049		1895	21	1920	34	1866	22		concordant	102.894		1866	22
2015-329-094		1834	19	1801	31	1871	16		concordant	96.2587		1871	16
2015-329-020		1891	20	1909	34	1871	22		concordant	102.031		1871	22
2015-329-016		2993	22	2999	49	2988	16		concordant	100.368		2988	16
Discordant Data
2015-329-063		1198	17	1044	21	1487	25		discordant	70.2085
2015-329-040		1369	18	1170	23	1694	21		discordant	69.0673
2015-329-013		1430	52	1210	74	1772	17		discordant	68.2844
2015-329-038		1405	21	1249	27	1649	26		discordant	75.7429
2015-329-078		1347	20	1260	28	1487	25		discordant	84.7344
2015-329-036		1478	21	1327	28	1701	21		discordant	78.0129
2015-329-054		1452	38	1343	38	1610	71		discordant	83.4161
2015-329-035		1539	20	1406	30	1726	21		discordant	81.46
2015-329-032		1555	24	1408	33	1758	27		discordant	80.091
2015-329-061		1623	27	1458	34	1844	35		discordant	79.0672
2015-329-033		1618	23	1504	33	1769	27		discordant	85.0198
2015-329-031		1664	27	1506	40	1870	29		discordant	80.5348
2015-329-019		1564	24	1513	32	1634	33		discordant	92.5949
2015-329-053		1573	26	1514	40	1651	26		discordant	91.702
2015-329-017		1649	36	1530	55	1799	33		discordant	85.0472
2015-329-074		1597	23	1535	33	1680	29		discordant	91.369
2015-329-047		1624	23	1582	31	1678	29		discordant	94.2789
2015-329-083		1688	21	1590	32	1812	20		discordant	87.7483
2015-329-024		1741	21	1695	33	1795	23		discordant	94.429
2015-329-093		1762	20	1712	35	1822	17		discordant	93.9627
2015-329-004		1815	25	1724	39	1921	25		discordant	89.7449
2015-329-009		1812	21	1860	38	1757	21		discordant	105.862
2015-329-070		2272	24	1996	42	2529	18		discordant	78.9245
Sample 2015-329-2: Anne Bay, -40.67205, 144.74102
2015-329-023		1483	21	1503	29	1454	33		concordant	103.37		1454	33
2015-329-012		1500	30	1469	35	1540	55		concordant	95.3896		1469	35
2015-329-042		1592	19	1611	28	1564	23		concordant	103.005		1564	23
2015-329-035		1659	29	1646	39	1674	43		concordant	98.3274		1674	43
2015-329-041		1696	19	1711	30	1676	18		concordant	102.088		1676	18
2015-329-059		1679	21	1676	31	1682	29		concordant	99.6433		1682	29
2015-329-011		1695	18	1705	30	1682	18		concordant	101.367		1682	18
2015-329-028		1714	20	1739	31	1682	25		concordant	103.389		1682	25
2015-329-062		1711	21	1724	31	1692	25		concordant	101.891		1692	25
2015-329-057		1711	21	1722	31	1698	25		concordant	101.413		1698	25
2015-329-053		1726	26	1739	42	1710	28		concordant	101.696		1710	28
2015-329-005		1732	20	1743	31	1717	25		concordant	101.514		1717	25
2015-329-032		1741	19	1759	31	1719	21		concordant	102.327		1719	21
2015-329-058		1754	19	1765	30	1740	21		concordant	101.437		1740	21
2015-329-054		1742	20	1728	33	1758	21		concordant	98.2935		1758	21
2015-329-045		1786	19	1799	31	1772	17		concordant	101.524		1772	17
2015-329-001		1802	22	1826	33	1772	27		concordant	103.047		1772	27
2015-329-004		1806	21	1830	35	1779	24		concordant	102.867		1779	24
2015-329-008		1814	20	1845	32	1779	24		concordant	103.71		1779	24
2015-329-060		1796	20	1805	31	1784	27		concordant	101.177		1784	27
2015-329-061		1841	26	1884	39	1790	37		concordant	105.251		1790	37
2015-329-027		1770	20	1745	33	1799	20		concordant	96.9983		1799	20
2015-329-036		1823	19	1839	31	1804	17		concordant	101.94		1804	17
2015-329-017		1827	20	1846	33	1805	23		concordant	102.271		1805	23
2015-329-018		1778	20	1751	33	1808	20		concordant	96.8473		1808	20
2015-329-047		1791	21	1775	32	1808	23		concordant	98.1748		1808	23
2015-329-055		1809	19	1809	32	1808	20		concordant	100.055		1808	20
2015-329-046		1807	21	1802	35	1810	17		concordant	99.558		1810	17
2015-329-013		1777	19	1746	31	1812	17		concordant	96.3576		1812	17
2015-329-043		1818	21	1822	33	1813	26		concordant	100.496		1813	26
2015-329-014		1861	20	1893	34	1825	20		concordant	103.726		1825	20
2015-329-010		1841	19	1850	32	1828	16		concordant	101.204		1828	16
2015-329-064		1848	19	1855	31	1838	20		concordant	100.925		1838	20
2015-329-048		1862	20	1868	35	1854	16		concordant	100.755		1854	16
2015-329-009		1848	24	1828	40	1871	25		concordant	97.7018		1871	25
2015-329-030		1902	21	1913	35	1888	22		concordant	101.324		1888	22
2015-329-003		1966	19	1980	33	1949	18		concordant	101.591		1949	18
2015-329-021		2008	20	2002	34	2014	17		concordant	99.4042		2014	17
2015-329-002		2295	29	2255	52	2330	28		concordant	96.7811		2330	28
Discordant Data
2015-329-016		1771	20	1683	33	1876	16		discordant	89.7122
2015-329-029		1772	25	1702	37	1854	32		discordant	91.8015
2015-329-050		1797	25	1745	39	1857	29		discordant	93.9688
2015-329-007		1807	26	1869	41	1736	31		discordant	107.661
Sample 2015-493: Anne Bay, -40.67205, 144.74102
2015-493-Zr-026		1357	28	1313	29	1430	55		concordant	91.8182		1313	29
2015-493-Zr-025		1341	28	1330	34	1360	49		concordant	97.7941		1330	34
2015-493-Zr-021		1359	26	1332	34	1399	39		concordant	95.2109		1332	34
2015-493-Zr-060		1349	25	1351	30	1350	45		concordant	100.074		1351	30
2015-493-Zr-014		1394	22	1356	28	1450	29		concordant	93.5172		1356	28
2015-493-Zr-029		1385	23	1386	31	1382	35		concordant	100.289		1386	31
2015-493-Zr-067		1401	23	1410	30	1386	39		concordant	101.732		1410	30
2015-493-Zr-020		1506	23	1451	31	1584	34		concordant	91.6035		1451	31
2015-493-Zr-017		1469	22	1476	33	1458	25		concordant	101.235		1476	33
2015-493-Zr-046B		1580	21	1589	33	1566	20		concordant	101.469		1566	20
2015-493-Zr-046A		1574	24	1560	34	1593	30		concordant	97.9284		1593	30
2015-493-Zr-066		1660	23	1672	35	1645	29		concordant	101.641		1645	29
2015-493-Zr-004		1698	29	1731	40	1656	40		concordant	104.529		1656	40
2015-493-Zr-018		1689	22	1683	35	1696	21		concordant	99.2335		1696	21
2015-493-Zr-008		1686	24	1676	38	1698	28		concordant	98.7044		1698	28
2015-493-Zr-036		1661	24	1630	35	1699	28		concordant	95.9388		1699	28
2015-493-Zr-068		1719	21	1727	34	1708	18		concordant	101.112		1708	18
2015-493-Zr-053		1730	20	1743	34	1713	18		concordant	101.751		1713	18
2015-493-Zr-069A		1713	21	1703	35	1724	18		concordant	98.7819		1724	18
2015-493-Zr-069B		1735	22	1725	35	1746	24		concordant	98.7973		1746	24
2015-493-Zr-065		1755	21	1758	34	1750	21		concordant	100.457		1750	21
2015-493-Zr-023		1773	22	1790	35	1752	24		concordant	102.169		1752	24
2015-493-Zr-071		1771	21	1784	34	1755	21		concordant	101.652		1755	21
2015-493-Zr-057		1728	22	1702	35	1758	24		concordant	96.8146		1758	24
2015-493-Zr-041		1754	21	1744	34	1765	21		concordant	98.8102		1765	21
2015-493-Zr-048B		1782	20	1796	34	1765	17		concordant	101.756		1765	17
2015-493-Zr-059		1781	22	1793	36	1767	24		concordant	101.471		1767	24
2015-493-Zr-048A		1786	22	1799	35	1769	24		concordant	101.696		1769	24
2015-493-Zr-024		1779	21	1780	36	1777	20		concordant	100.169		1777	20
2015-493-Zr-043		1805	21	1829	36	1777	20		concordant	102.926		1777	20
2015-493-Zr-035		1791	25	1800	37	1779	30		concordant	101.18		1779	30
2015-493-Zr-072		1793	20	1803	35	1780	17		concordant	101.292		1780	17
2015-493-Zr-011		1803	22	1819	37	1784	24		concordant	101.962		1784	24
2015-493-Zr-031		1778	21	1767	34	1790	17		concordant	98.7151		1790	17
2015-493-Zr-047		1789	22	1787	36	1790	23		concordant	99.8324		1790	23
2015-493-Zr-022		1832	21	1866	36	1794	20		concordant	104.013		1794	20
2015-493-Zr-006		1805	21	1811	35	1797	17		concordant	100.779		1797	17
2015-493-Zr-038a		1778	21	1755	35	1802	20		concordant	97.3918		1802	20
2015-493-Zr-012		1808	23	1793	36	1825	23		concordant	98.2466		1825	23
2015-493-Zr-028		1869	22	1907	39	1825	20		concordant	104.493		1825	20
2015-493-Zr-005		1778	24	1737	36	1826	26		concordant	95.126		1826	26
2015-493-Zr-051		1862	30	1892	44	1828	39		concordant	103.501		1828	39
2015-493-Zr-027		1869	24	1888	40	1847	26		concordant	102.22		1847	26
2015-493-Zr-003		1868	22	1863	37	1874	22		concordant	99.413		1874	22
2015-493-Zr-002		1909	27	1932	45	1882	31		concordant	102.657		1882	31
2015-493-Zr-064		1915	21	1873	36	1960	18		concordant	95.5612		1960	18
2015-493-Zr-061		2540	25	2560	53	2523	18		concordant	101.467		2523	18
Discordant Data
2015-493-Zr-032		1640	27	1571	41	1729	28		discordant	90.8618
2015-493-Zr-056		1655	20	1611	32	1712	18		discordant	94.1005
2015-493-Zr-070		1659	22	1617	36	1712	21		discordant	94.4509
2015-493-Zr-033		1691	22	1649	34	1741	24		discordant	94.7157
2015-493-Zr-038b		1739	23	1679	37	1810	23		discordant	92.7624
2015-493-Zr-015		1751	23	1682	36	1833	23		discordant	91.7621
2015-493-Zr-013		1743	21	1688	35	1808	17		discordant	93.3628
Sample 2015-326: Jacob's Boat Harbour, -40.92625, 145.61737
2015-326-zr-r2-037		1235	20	1226	21	1250	43		concordant	98.08		1235	20
2015-326-zr-r2-023		1321	29	1286	30	1380	57		concordant	93.1884		1321	29
2015-326-zr-r2-034		1334	21	1321	22	1355	40		concordant	97.4908		1334	21
2015-326-zr-r2-001		1337	14	1329	19	1351	18		concordant	98.3716		1337	14
2015-326-zr-r2-010		1352	16	1345	21	1360	27		concordant	98.8971		1352	16
2015-326-zr-r2-028		1356	17	1337	21	1386	26		concordant	96.4646		1356	17
2015-326-zr-r2-019		1373	19	1328	24	1444	29		concordant	91.9668		1373	19
2015-326-zr-r2-021		1383	18	1329	21	1467	29		concordant	90.593		1383	18
2015-326-zr-r2-035		1463	19	1462	27	1464	25		concordant	99.8634		1463	19
2015-326-zr-r2-016		1480	18	1460	24	1509	24		concordant	96.7528		1480	18
2015-326-zr-r2-031		1608	20	1603	26	1614	30		concordant	99.3185		1614	30
2015-326-zr-r2-033		1776	22	1777	29	1775	34		concordant	100.113		1775	34
2015-326-zr-r2-020		1804	19	1824	27	1779	27		concordant	102.53		1779	27
2015-326-zr-r2-032		1750	17	1722	26	1782	20		concordant	96.633		1782	20
2015-326-zr-r2-003		1769	16	1756	26	1784	17		concordant	98.4305		1784	17
2015-326-zr-r2-022		1789	24	1794	33	1784	34		concordant	100.561		1784	34
2015-326-zr-r2-040		1742	21	1705	33	1785	24		concordant	95.5182		1785	24
2015-326-zr-r2-013		1796	16	1792	25	1799	17		concordant	99.6109		1799	17
2015-326-zr-r2-038		1828	18	1845	27	1807	23		concordant	102.103		1807	23
2015-326-zr-r2-015		1839	18	1860	30	1815	20		concordant	102.479		1815	20
2015-326-zr-r2-009		1773	17	1735	26	1818	23		concordant	95.4345		1818	23
2015-326-zr-r2-025		1849	18	1842	28	1855	22		concordant	99.2992		1855	22
2015-326-zr-r2-017		3122	19	3131	44	3115	14		concordant	100.514		3115	14
Discordant Data
2015-326-zr-r2-036		1705	19	1627	25	1804	27		discordant	90.1885
2015-326-zr-r2-018		1692	19	1631	27	1769	24		discordant	92.199
2015-326-zr-r2-002		1716	21	1659	34	1785	20		discordant	92.9412
2015-326-zr-r2-029		1726	21	1683	31	1779	24		discordant	94.6037
2015-326-zr-r2-027		1807	15	1765	26	1854	16		discordant	95.1996
2015-326-zr-r2-011		1866	20	1910	31	1815	23		discordant	105.234
Sample 2016-003: Jacob’s Boat Harbour, -40.92546, 145.61856
2016-003-zr-186		1209	24	1184	27	1250	43		concordant	94.72		1184	27
2016-003-zr-144		1199	26	1186	29	1220	49		concordant	97.2131		1186	29
2016-003-zr-161		1202	27	1188	34	1230	39		concordant	96.5854		1188	34
2016-003-zr-154		1204	19	1194	28	1221	20		concordant	97.7887		1194	28
2016-003-zr-083		1205	20	1201	27	1211	29		concordant	99.1742		1201	27
2016-003-zr-038		1207	19	1212	27	1196	25		concordant	101.338		1212	27
2016-003-zr-151		1223	30	1226	31	1220	63		concordant	100.492		1226	31
2016-003-zr-104		1233	26	1231	30	1240	48		concordant	99.2742		1231	30
2016-003-zr-036		1245	18	1231	27	1268	14		concordant	97.082		1231	27
2016-003-zr-044		1235	25	1233	29	1240	48		concordant	99.4355		1233	29
2016-003-zr-136		1233	20	1237	28	1225	29		concordant	100.98		1237	28
2016-003-zr-123		1222	20	1241	28	1189	25		concordant	104.373		1241	28
2016-003-zr-179		1231	28	1243	31	1210	54		concordant	102.727		1243	31
2016-003-zr-180		1233	21	1245	28	1213	34		concordant	102.638		1245	28
2016-003-zr-184		1250	22	1246	30	1254	29		concordant	99.362		1246	30
2016-003-zr-176		1250	21	1271	29	1213	34		concordant	104.782		1271	29
2016-003-zr-193		1260	22	1272	29	1237	34		concordant	102.829		1272	29
2016-003-zr-172		1271	28	1281	34	1250	48		concordant	102.48		1281	34
2016-003-zr-129		1290	21	1287	30	1292	28		concordant	99.613		1287	30
2016-003-zr-134		1329	33	1311	34	1360	67		concordant	96.3971		1311	34
2016-003-zr-171		1321	23	1314	29	1333	36		concordant	98.5746		1314	29
2016-003-zr-0105		1385	24	1328	29	1473	37		concordant	90.1561		1328	29
2016-003-zr-140		1355	25	1331	36	1392	26		concordant	95.6178		1331	36
2016-003-zr-013		1362	21	1341	30	1395	22		concordant	96.129		1341	30
2016-003-zr-082		1335	19	1349	28	1312	23		concordant	102.82		1349	28
2016-003-zr-056		1404	20	1349	29	1489	21		concordant	90.5977		1349	29
2016-003-zr-150		1338	21	1352	29	1315	28		concordant	102.814		1352	29
2016-003-zr-194		1345	22	1379	31	1289	28		concordant	106.982		1379	31
2016-003-zr-071		1381	22	1379	31	1382	31		concordant	99.7829		1379	31
2016-003-zr-107		1384	23	1382	31	1386	31		concordant	99.7114		1382	31
2016-003-zr-165		1401	34	1387	41	1420	55		concordant	97.6761		1387	41
2016-003-zr-101		1426	22	1401	32	1462	29		concordant	95.8276		1401	32
2016-003-zr-024		1440	23	1416	32	1475	33		concordant	96		1416	32
2016-003-zr-199		1432	23	1418	32	1452	29		concordant	97.6584		1418	32
2016-003-zr-149		1437	23	1418	36	1462	21		concordant	96.9904		1418	36
2016-003-zr-080		1412	25	1421	33	1397	39		concordant	101.718		1421	33
2016-003-zr-047		1422	24	1422	33	1420	34		concordant	100.141		1422	33
2016-003-zr-095		1416	24	1432	32	1390	35		concordant	103.022		1432	32
2016-003-zr-091		1420	23	1443	33	1386	26		concordant	104.113		1443	33
2016-003-zr-041		1432	25	1448	35	1408	39		concordant	102.841		1448	35
2016-003-zr-181		1456	23	1450	36	1464	21		concordant	99.0437		1450	36
2016-003-zr-135		1458	24	1457	38	1458	21		concordant	99.9314		1457	38
2016-003-zr-025		1449	22	1458	32	1435	25		concordant	101.603		1458	32
2016-003-zr-197		1467	22	1458	32	1481	25		concordant	98.447		1458	32
2016-003-zr-070		1464	19	1461	30	1467	21		concordant	99.591		1461	30
2016-003-zr-032		1464	20	1461	30	1469	21		concordant	99.4554		1461	30
2016-003-zr-164		1463	20	1462	32	1464	17		concordant	99.8634		1462	32
2016-003-zr-054		1491	25	1511	36	1462	33		concordant	103.352		1462	33
2016-003-zr-066		1476	20	1463	30	1495	24		concordant	97.8595		1463	30
2016-003-zr-069		1463	23	1465	33	1458	29		concordant	100.48		1465	33
2016-003-zr-079		1467	21	1467	32	1464	21		concordant	100.205		1467	32
2016-003-zr-159		1475	27	1470	37	1481	37		concordant	99.2573		1470	37
2016-003-zr-167		1463	21	1473	32	1448	25		concordant	101.727		1473	32
2016-003-zr-058		1466	20	1473	31	1454	21		concordant	101.307		1473	31
2016-003-zr-052		1473	22	1475	33	1469	25		concordant	100.408		1475	33
2016-003-zr-103		1494	22	1506	34	1475	25		concordant	102.102		1475	25
2016-003-zr-064		1493	21	1507	33	1475	21		concordant	102.169		1475	21
2016-003-zr-122		1464	20	1476	32	1448	21		concordant	101.934		1476	32
2016-003-zr-012		1491	21	1478	32	1507	24		concordant	98.0756		1478	32
2016-003-zr-065		1472	23	1479	34	1462	29		concordant	101.163		1479	34
2016-003-zr-0122		1507	21	1480	31	1545	24		concordant	95.7929		1480	31
2016-003-zr-175		1476	21	1483	33	1464	21		concordant	101.298		1483	33
2016-003-zr-138		1503	22	1513	34	1489	21		concordant	101.612		1489	21
2016-003-zr-056		1472	21	1491	33	1444	21		concordant	103.255		1491	33
2016-003-zr-085		1478	21	1496	33	1450	25		concordant	103.172		1496	33
2016-003-zr-198		1494	22	1496	33	1491	29		concordant	100.335		1496	33
2016-003-zr-072		1485	21	1497	33	1467	21		concordant	102.045		1497	33
2016-003-zr-118		1588	23	1605	35	1563	27		concordant	102.687		1563	27
2016-003-zr-158		1533	22	1509	33	1566	27		concordant	96.3602		1566	27
2016-003-zr-113		1583	21	1593	34	1568	19		concordant	101.594		1568	19
2016-003-zr-090		1605	24	1616	36	1587	31		concordant	101.827		1587	31
2016-003-zr-026		1577	23	1567	34	1591	31		concordant	98.4915		1591	31
2016-003-zr-089		1616	22	1635	36	1591	19		concordant	102.766		1591	19
2016-003-zr-141		1626	24	1652	36	1593	30		concordant	103.704		1593	30
2016-003-zr-127		1609	22	1619	35	1597	23		concordant	101.378		1597	23
2016-003-zr-002		1601	32	1601	43	1599	45		concordant	100.125		1599	45
2016-003-zr-131		1610	25	1615	37	1603	30		concordant	100.749		1603	30
2016-003-zr-098		1591	21	1577	34	1608	19		concordant	98.0721		1608	19
2016-003-zr-121		1598	23	1590	35	1608	26		concordant	98.8806		1608	26
2016-003-zr-008		1628	26	1639	37	1612	34		concordant	101.675		1612	34
2016-003-zr-019		1630	24	1637	37	1620	30		concordant	101.049		1620	30
2016-003-zr-031		1617	24	1611	35	1623	26		concordant	99.2606		1623	26
2016-003-zr-063		1638	24	1647	37	1627	30		concordant	101.229		1627	30
2016-003-zr-112		1633	23	1635	36	1629	22		concordant	100.368		1629	22
2016-003-zr-037		1643	25	1637	36	1651	33		concordant	99.152		1651	33
2016-003-zr-014		1673	23	1688	38	1653	22		concordant	102.117		1653	22
2016-003-zr-077		1632	34	1610	53	1656	33		concordant	97.2222		1656	33
2016-003-zr-042		1640	54	1610	88	1678	43		concordant	95.9476		1678	43
2016-003-zr-124		1676	23	1671	37	1680	25		concordant	99.4643		1680	25
2016-003-zr-155		1729	23	1745	37	1710	21		concordant	102.047		1710	21
2016-003-zr-046		1727	22	1721	37	1734	18		concordant	99.2503		1734	18
2016-003-zr-099		1763	24	1779	39	1745	28		concordant	101.948		1745	28
2016-003-zr-116		1764	23	1777	39	1746	21		concordant	101.775		1746	21
2016-003-zr-029		1767	24	1780	39	1750	27		concordant	101.714		1750	27
2016-003-zr-040		1717	22	1688	35	1752	21		concordant	96.347		1752	21
2016-003-zr-185		1733	25	1717	41	1752	24		concordant	98.0023		1752	24
2016-003-zr-055		1755	25	1757	38	1753	31		concordant	100.228		1753	31
2016-003-zr-097		1764	21	1772	37	1753	17		concordant	101.084		1753	17
2016-003-zr-004		1766	22	1776	36	1753	21		concordant	101.312		1753	21
2016-003-zr-188		1771	22	1784	38	1753	17		concordant	101.768		1753	17
2016-003-zr-187		1788	26	1808	43	1762	27		concordant	102.611		1762	27
2016-003-zr-177		1710	30	1665	45	1765	34		concordant	94.3343		1765	34
2016-003-zr-051		1769	26	1769	40	1767	31		concordant	100.113		1767	31
2016-003-zr-139		1789	21	1806	38	1767	17		concordant	102.207		1767	17
2016-003-zr-030		1769	26	1769	39	1769	31		concordant	100		1769	31
2016-003-zr-182		1722	28	1679	44	1775	27		concordant	94.5915		1775	27
2016-003-zr-190		1792	23	1806	39	1775	20		concordant	101.746		1775	20
2016-003-zr-120		1822	23	1863	41	1775	20		concordant	104.958		1775	20
2016-003-zr-178		1770	27	1762	46	1779	24		concordant	99.0444		1779	24
2016-003-zr-125		1805	22	1828	39	1779	17		concordant	102.754		1779	17
2016-003-zr-119		1791	27	1799	44	1780	27		concordant	101.067		1780	27
2016-003-zr-146		1749	24	1722	39	1782	20		concordant	96.633		1782	20
2016-003-zr-0117		1790	22	1795	36	1782	24		concordant	100.73		1782	24
2016-003-zr-108		1802	24	1819	40	1782	24		concordant	102.076		1782	24
2016-003-zr-050		1788	25	1788	41	1787	27		concordant	100.056		1787	27
2016-003-zr-048		1793	24	1798	39	1787	27		concordant	100.616		1787	27
2016-003-zr-111		1794	26	1799	41	1787	30		concordant	100.672		1787	30
2016-003-zr-015		1794	22	1800	37	1787	17		concordant	100.727		1787	17
2016-003-zr-157		1763	29	1740	40	1789	40		concordant	97.261		1789	40
2016-003-zr-145		1811	24	1831	40	1789	27		concordant	102.348		1789	27
2016-003-zr-076		1785	21	1778	35	1792	20		concordant	99.2188		1792	20
2016-003-zr-005		1773	30	1754	42	1794	43		concordant	97.7703		1794	43
2016-003-zr-068		1797	25	1799	40	1794	30		concordant	100.279		1794	30
2016-003-zr-115		1798	24	1801	40	1794	23		concordant	100.39		1794	23
2016-003-zr-148		1810	23	1823	39	1795	20		concordant	101.56		1795	20
2016-003-zr-195		1792	26	1787	40	1797	30		concordant	99.4435		1797	30
2016-003-zr-001		1810	23	1819	39	1797	20		concordant	101.224		1797	20
2016-003-zr-074		1847	24	1891	41	1797	20		concordant	105.231		1797	20
2016-003-zr-109		1783	28	1769	39	1799	40		concordant	98.3324		1799	40
2016-003-zr-170		1813	24	1823	39	1800	23		concordant	101.278		1800	23
2016-003-zr-011		1813	26	1824	40	1800	33		concordant	101.333		1800	33
2016-003-zr-114		1776	26	1753	42	1802	23		concordant	97.2808		1802	23
2016-003-zr-010		1796	21	1789	35	1804	20		concordant	99.1685		1804	20
2016-003-zr-160		1796	23	1788	38	1805	23		concordant	99.0582		1805	23
2016-003-zr-191		1793	22	1779	38	1808	20		concordant	98.396		1808	20
2016-003-zr-084		1847	22	1875	40	1815	17		concordant	103.306		1815	17
2016-003-zr-028		1815	25	1808	40	1823	26		concordant	99.1772		1823	26
2016-003-zr-143		1829	22	1834	39	1823	17		concordant	100.603		1823	17
2016-003-zr-016		1801	26	1778	40	1828	29		concordant	97.2648		1828	29
2016-003-zr-102		1809	36	1786	44	1830	58		concordant	97.5956		1830	58
2016-003-zr-060		1808	23	1787	40	1831	16		concordant	97.5969		1831	16
2016-003-zr-057		1836	36	1830	59	1839	39		concordant	99.5106		1839	39
2016-003-zr-110		1819	22	1799	38	1841	16		concordant	97.7186		1841	16
2016-003-zr-059		1840	24	1836	43	1843	16		concordant	99.6202		1843	16
2016-003-zr-035		1851	22	1858	40	1843	16		concordant	100.814		1843	16
2016-003-zr-153		1817	29	1792	45	1846	35		concordant	97.0748		1846	35
2016-003-zr-137		1842	23	1837	41	1847	16		concordant	99.4586		1847	16
2016-003-zr-081		1857	23	1866	40	1847	19		concordant	101.029		1847	19
2016-003-zr-034		1855	45	1861	55	1850	74		concordant	100.595		1850	74
2016-003-zr-168		1863	24	1872	43	1852	16		concordant	101.08		1852	16
2016-003-zr-100		1862	25	1868	46	1854	16		concordant	100.755		1854	16
2016-003-zr-152		1869	24	1881	40	1855	22		concordant	101.402		1855	22
2016-003-zr-007		1871	23	1879	40	1860	19		concordant	101.022		1860	19
2016-003-zr-166		1852	22	1843	39	1862	19		concordant	98.9796		1862	19
2016-003-zr-009		1882	23	1900	40	1862	22		concordant	102.041		1862	22
2016-003-zr-049		1844	22	1824	39	1865	16		concordant	97.8016		1865	16
2016-003-zr-128		1869	22	1870	40	1868	19		concordant	100.107		1868	19
2016-003-zr-147		1889	25	1908	44	1868	19		concordant	102.141		1868	19
2016-003-zr-045		1864	26	1858	44	1871	22		concordant	99.3052		1871	22
2016-003-zr-196		1868	27	1862	43	1874	35		concordant	99.3597		1874	35
2016-003-zr-094		1892	23	1889	39	1895	22		concordant	99.6834		1895	22
2016-003-zr-126		1890	24	1881	40	1899	25		concordant	99.0521		1899	25
2016-003-zr-087		1881	34	1843	47	1921	49		concordant	95.9396		1921	49
2016-003-zr-073		2481	26	2459	53	2499	17		concordant	98.3994		2499	17
2016-003-zr-174		2788	25	2817	56	2767	12		concordant	101.807		2767	12
2016-003-zr-117		3127	27	3176	65	3095	18		concordant	102.617		3095	18
Discordant data
2016-003-zr-020		1580	29	1518	42	1662	36		discordant	91.3357
2016-003-zr-092		1623	31	1572	42	1691	43		discordant	92.9627
2016-003-zr-133		1626	29	1572	44	1696	28		discordant	92.6887
2016-003-zr-097		1690	30	1620	44	1779	37		discordant	91.0624
2016-003-zr-0138		1777	38	1688	48	1882	56		discordant	89.6918
2016-003-zr-022		1770	25	1698	42	1855	19		discordant	91.5364
2016-003-zr-078		1756	24	1699	39	1825	23		discordant	93.0959
2016-003-zr-067		1760	23	1708	39	1822	17		discordant	93.7431
2016-003-zr-156		1808	25	1758	39	1866	25		discordant	94.2122
2016-003-zr-132		1814	22	1762	37	1873	19		discordant	94.0737
2016-003-zr-088		1859	40	1768	52	1961	56		discordant	90.1581
2016-003-zr-062		1858	23	1794	38	1930	21		discordant	92.9534
2016-003-zr-181B		1838	25	1890	42	1779	27		discordant	106.239
Jacob Quartzite: Meunna, -41.07560, 145.46268
Reference:	Mulder, J. A., Halpin, J.A., and Daczko, N.R., 2015, Mesoproterozoic Tasmania: witness to the East Antarctica-Laurentia connection within Nuna: Geology, v. 43, p. 759–762. doi:10.1130/G36850.1.
					Apparent ages (Ma)
Analysis		207Pb*	±1σ	206Pb*	±1σ	206Pb*	±1σ		Overlaps 1:1 concordance at 2s?	6/8 vs 7/6 conc. (%)		Preffered age (1500Ma switch)	±1σ
		235U	(Ma)	238U*	(Ma)	207Pb*	(Ma)					(Ma)	(Ma)
AP30A251		1189	23	1130	24	1290	46		concordant	87.5969		1130	24
AP30A235		1181	25	1142	29	1240	48		concordant	92.0968		1142	29
MY29A030		1230	22	1165	25	1337	36		concordant	87.1354		1165	25
AP30A213		1252	28	1186	31	1360	53		concordant	87.2059		1186	31
AP30A207		1230	60	1190	44	1290	140		concordant	92.2481		1190	44
AP30A159		1200	58	1190	44	1220	140		concordant	97.541		1190	44
AP30A139		1180	38	1195	31	1150	92		concordant	103.913		1195	31
MY29A017		1200	55	1200	44	1220	130		concordant	98.3607		1200	44
MY29A037		1223	28	1202	27	1270	61		concordant	94.6457		1202	27
AP30A209		1212	36	1206	32	1220	83		concordant	98.8525		1206	32
AP30A147		1270	58	1210	41	1380	140		concordant	87.6812		1210	41
MY29A041		1231	25	1215	28	1270	47		concordant	95.6693		1215	28
AP30A231		1236	24	1218	28	1270	42		concordant	95.9055		1218	28
AP30A131		1233	29	1220	28	1240	62		concordant	98.3871		1220	28
AP30A135		1224	26	1225	28	1220	53		concordant	100.41		1225	28
AP30A177		1255	32	1227	33	1310	64		concordant	93.6641		1227	33
AP30A192		1306	26	1227	28	1450	46		concordant	84.6207		1227	28
AP30A168		1253	36	1229	33	1290	79		concordant	95.2713		1229	33
AP30A217		1220	100	1230	61	1200	260		concordant	102.5		1230	61
AP30A154		1243	28	1234	28	1270	57		concordant	97.1654		1234	28
AP30A133		1261	29	1239	29	1290	60		concordant	96.0465		1239	29
AP30A243		1251	32	1241	34	1270	66		concordant	97.7165		1241	34
AP30A247		1262	28	1253	29	1270	57		concordant	98.6614		1253	29
AP30A227		1340	69	1260	49	1490	150		concordant	84.5638		1260	49
AP30A190		1285	21	1261	25	1337	36		concordant	94.3156		1261	25
AP30A150		1319	22	1276	25	1382	39		concordant	92.33		1276	25
AP30A197		1298	25	1278	31	1337	41		concordant	95.5871		1278	31
MY29A044		1282	24	1281	25	1290	46		concordant	99.3023		1281	25
AP30A226		1293	25	1286	26	1310	50		concordant	98.1679		1286	26
AP30A165		1313	31	1291	31	1360	62		concordant	94.9265		1291	31
AP30A236		1289	30	1293	31	1290	60		concordant	100.233		1293	31
MY29A043		1317	37	1299	37	1340	76		concordant	96.9403		1299	37
AP30A137		1240	50	1300	47	1150	110		concordant	113.043		1300	47
MY29A032		1368	29	1309	27	1470	58		concordant	89.0476		1309	27
AP30A176		1450	110	1310	86	1640	220		concordant	79.878		1310	86
AP30A237		1335	30	1323	33	1360	58		concordant	97.2794		1323	33
MY29A021		1355	23	1326	27	1403	39		concordant	94.5118		1326	27
MY29A015		1335	29	1328	33	1340	54		concordant	99.1045		1328	33
MY29A012		1340	58	1330	49	1360	130		concordant	97.7941		1330	49
MY29A035		1367	26	1345	28	1400	47		concordant	96.0714		1345	28
AP30A248		1400	64	1350	51	1490	140		concordant	90.604		1350	51
MY29A051		1350	44	1368	41	1310	96		concordant	104.427		1368	41
MY29A028		1390	32	1368	35	1420	59		concordant	96.338		1368	35
AP30A224		1404	23	1377	30	1446	34		concordant	95.2282		1377	30
MY29A040		1397	30	1380	30	1420	59		concordant	97.1831		1380	30
AP30A249		1427	27	1380	30	1510	48		concordant	91.3907		1380	30
AP30A189		1412	29	1392	30	1450	54		concordant	96		1392	30
MY29A022		1426	27	1392	30	1490	49		concordant	93.4228		1392	30
AP30A191		1460	41	1410	44	1530	75		concordant	92.1569		1410	44
MY29A029		1428	39	1416	37	1450	80		concordant	97.6552		1416	37
AP30A170		1436	39	1422	38	1470	78		concordant	96.7347		1422	38
MY29A031		1434	31	1429	38	1450	50		concordant	98.5517		1429	38
AP30A140		1429	31	1435	32	1420	59		concordant	101.056		1435	32
AP30A196		1441	28	1438	32	1450	50		concordant	99.1724		1438	32
AP30A153		1453	26	1438	32	1467	41		concordant	98.0232		1438	32
AP30A184		1440	28	1442	32	1450	50		concordant	99.4483		1442	32
AP30A245		1440	26	1442	32	1446	42		concordant	99.7234		1442	32
AP30A214		1442	25	1442	32	1446	38		concordant	99.7234		1442	32
AP30A230		1457	28	1462	33	1450	50		concordant	100.828		1462	33
MY29A038		1463	28	1465	33	1470	50		concordant	99.6599		1465	33
MY29A016		1486	28	1468	33	1510	48		concordant	97.2185		1468	33
MY29A020		1460	30	1471	34	1450	54		concordant	101.448		1471	34
MY29A011		1469	26	1471	34	1467	41		concordant	100.273		1471	34
AP30A186		1472	29	1485	34	1450	50		concordant	102.414		1485	34
AP30A233		1486	26	1485	34	1487	41		concordant	99.8655		1485	34
MY29A009		1493	32	1488	34	1510	60		concordant	98.543		1488	34
MY29A019		1619	34	1624	41	1600	57		concordant	101.5		1600	57
MY29A013		1600	34	1580	39	1620	60		concordant	97.5309		1620	60
AP30A206		1588	37	1549	38	1640	70		concordant	94.4512		1640	70
AP30A244		1608	24	1588	31	1642	37		concordant	96.7113		1642	37
MY29A010		1638	23	1641	33	1642	30		concordant	99.9391		1642	30
AP30A171		1648	28	1649	34	1642	48		concordant	100.426		1642	48
AP30A188		1658	38	1658	43	1660	65		concordant	99.8795		1660	65
AP30A185		1658	27	1662	34	1660	44		concordant	100.12		1660	44
AP30A211		1717	30	1763	39	1660	47		concordant	106.205		1660	47
AP30A151		1679	27	1684	35	1678	43		concordant	100.358		1678	43
MY29A036		1684	30	1688	36	1678	50		concordant	100.596		1678	50
AP30A195		1697	27	1711	37	1678	40		concordant	101.967		1678	40
MY29A050		1715	27	1748	38	1678	40		concordant	104.172		1678	40
AP30A175		1697	25	1697	36	1696	36		concordant	100.059		1696	36
AP30A212		1705	37	1702	45	1710	60		concordant	99.5322		1710	60
AP30A215		1717	40	1716	46	1710	70		concordant	100.351		1710	70
AP30A169		1702	31	1693	45	1713	42		concordant	98.8325		1713	42
AP30A130		1750	30	1753	38	1748	48		concordant	100.286		1748	48
AP30A204		1760	25	1753	38	1765	31		concordant	99.3201		1765	31
AP30A152		1769	26	1778	40	1765	34		concordant	100.737		1765	34
AP30A146		1828	38	1813	51	1847	55		concordant	98.1592		1847	55
AP30A173		1130	37	1029	30	1340	85		discordant	76.791
AP30A242		1190	28	1092	26	1380	57		discordant	79.1304
MY29A018		1273	26	1132	24	1530	52		discordant	73.9869
MY29A045		1258	32	1154	29	1450	67		discordant	79.5862
MY29A039		1320	41	1175	34	1550	86		discordant	75.8065
AP30A210		1301	31	1206	32	1470	58		discordant	82.0408
AP30A216		1635	40	1430	51	1910	52		discordant	74.8691
MY29A008		1465	38	1528	36	1380	79		discordant	110.725
AP30A187		1615	26	1549	38	1696	32		discordant	91.3325
AP30A148		1614	36	1553	45	1700	57		discordant	91.3529
AP30A172		1721	41	1590	63	1879	38		discordant	84.6195
AP30A166		1691	26	1604	32	1799	40		discordant	89.1606
AP30A194		1671	36	1604	40	1770	61		discordant	90.6215
AP30A203		1698	32	1608	40	1815	49		discordant	88.595
AP30A174		1728	31	1675	44	1799	40		discordant	93.1073
AP30A157		1790	60	1680	53	1930	110		discordant	87.0466
Jacob Quartzite: Meunna, -41.07560, 145.46268
Reference:	Black, L.P., Calver, C., Seymour, D., and Reed, A., 2004, SHRIMP U-Pb detrital zircon ages from Proterozoic and early Palaeozoic sand- stone and their bearing on the early geological evolution of Tasmania: Australian Journal of Earth Sciences, v. 51, p. 855–900.
					Apparent ages (Ma)
Analysis		207Pb*	±1σ	206Pb*	±1σ	206Pb*	±1σ		Overlaps 1:1 concordance at 2s?	6/8 vs 7/6 conc. (%)		Preffered age (1500Ma switch)	±1σ
		235U	(Ma)	238U*	(Ma)	207Pb*	(Ma)					(Ma)	(Ma)
171.1		877	49	876	28	877	150		concordant	99.886		876	28
171.2		947.3	15	936.2	18	973.7	23		concordant	96.1487		936.2	18
110.1		1028	21	1007	25	1073	32		concordant	93.849		1007	25
129.1		1125	29	1060	28	1250	55		concordant	84.8		1060	28
159.1		1060	36	1060	33	1060	78		concordant	100		1060	33
140.1		1083	19	1072	22	1105	32		concordant	97.0136		1072	22
185.1		1054	23	1077	25	1000	45		concordant	107.7		1077	25
108.1		1060	31	1080	35	1030	55		concordant	104.854		1080	35
143.1		1085	31	1120	33	1010	61		concordant	110.891		1120	33
159.2		1147	34	1130	40	1170	55		concordant	96.5812		1130	40
124.2		1160	44	1150	46	1180	82		concordant	97.4576		1150	46
144.2		1154	33	1153	35	1150	61		concordant	100.261		1153	35
169.1		1160	49	1160	58	1160	76		concordant	100		1160	58
158.1		1220	44	1170	55	1300	58		concordant	90		1170	55
107.1		1160	64	1170	71	1140	110		concordant	102.632		1170	71
161.1		1220	24	1172	33	1306	16		concordant	89.7397		1172	33
179.1		1189	20	1172	25	1218	27		concordant	96.2233		1172	25
162.1		1185	22	1188	27	1176	33		concordant	101.02		1188	27
118.1		1200	22	1201	29	1199	22		concordant	100.167		1201	29
111.1		1202	19	1212	26	1184	23		concordant	102.365		1212	26
177.1		1204	23	1213	26	1190	40		concordant	101.933		1213	26
155.1		1233	19	1227	27	1242	17		concordant	98.7923		1227	27
158.2		1232	35	1230	41	1240	58		concordant	99.1935		1230	41
131.1		1217	24	1231	32	1191	30		concordant	103.359		1231	32
144.1		1180	53	1240	51	1060	110		concordant	116.981		1240	51
186.1		1244	19	1242	25	1247	24		concordant	99.599		1242	25
178.1		1244	17	1243	22	1245	22		concordant	99.8394		1243	22
117.1		1314	20	1251	26	1418	26		concordant	88.2228		1251	26
101.1		1250	18	1252	25	1245	19		concordant	100.562		1252	25
154.1		1284	21	1264	28	1317	23		concordant	95.9757		1264	28
106.1		1297	34	1265	36	1350	60		concordant	93.7037		1265	36
115.1		1361	29	1278	35	1493	39		concordant	85.5995		1278	35
119.1		1295	24	1287	29	1308	37		concordant	98.3945		1287	29
163.1		1310	28	1293	39	1335	29		concordant	96.8539		1293	39
114.1		1305	30	1320	44	1273	26		concordant	103.692		1320	44
164.1		1296	25	1321	38	1254	17		concordant	105.343		1321	38
133.1		1353	27	1332	26	1390	50		concordant	95.8273		1332	26
121.1		1333	22	1335	33	1328	18		concordant	100.527		1335	33
102.1		1385	26	1348	35	1444	34		concordant	93.3518		1348	35
153.1		1405	21	1392	28	1423	26		concordant	97.8215		1392	28
151.1		1397	41	1408	39	1380	77		concordant	102.029		1408	39
128.1		1423	20	1411	28	1439	23		concordant	98.0542		1411	28
184.1		1422	23	1419	34	1427	21		concordant	99.4394		1419	34
125.1		1460	23	1441	34	1487	23		concordant	96.9065		1441	34
137.1		1447	26	1442	39	1454	25		concordant	99.1747		1442	39
183.1		1466	26	1444	35	1497	30		concordant	96.4596		1444	35
180.1		1476	22	1453	31	1509	24		concordant	96.2889		1453	31
172.1		1444	17	1457	26	1425	13		concordant	102.246		1457	26
126.1		1476	29	1460	45	1497	18		concordant	97.5284		1460	45
136.1		1427	34	1462	41	1380	55		concordant	105.942		1462	41
150.1		1475	20	1470	28	1481	23		concordant	99.2573		1470	28
170.1		1462	30	1490	42	1423	36		concordant	104.708		1490	42
116.1		1473	31	1492	46	1446	34		concordant	103.181		1492	46
166.1		1511	33	1520	51	1495	28		concordant	101.672		1495	28
104.1		1571	40	1590	65	1551	29		concordant	102.515		1551	29
134.1		1569	31	1538	47	1610	28		concordant	95.528		1610	28
160.1		1612	23	1598	33	1631	26		concordant	97.9767		1631	26
132.1		1696	23	1724	37	1660	22		concordant	103.855		1660	22
181.1		1658	21	1649	34	1671	16		concordant	98.6834		1671	16
174.1		1678	25	1663	35	1696	28		concordant	98.0542		1696	28
135.1		1738	30	1737	47	1738	28		concordant	99.9425		1738	28
139.1		1797	27	1828	44	1760	24		concordant	103.864		1760	24
147.1		1721	21	1688	35	1762	14		concordant	95.8002		1762	14
130.1		1741	27	1715	40	1772	29		concordant	96.7833		1772	29
167.1		1820	31	1855	56	1779	15		concordant	104.272		1779	15
113.1		1791	27	1792	45	1789	19		concordant	100.168		1789	19
105.1		1823	32	1853	48	1789	38		concordant	103.577		1789	38
168.1		1843	32	1865	56	1817	20		concordant	102.642		1817	20
145.1		1798	27	1779	44	1820	23		concordant	97.7473		1820	23
152.1		1813	26	1802	39	1823	29		concordant	98.8481		1823	29
182.1		1814	16	1801	28	1830	8.6		concordant	98.4153		1830	8.6
141.1		1826	22	1806	38	1849	16		concordant	97.6744		1849	16
112.1		1878	27	1903	47	1851	18		concordant	102.809		1851	18
173.1		1851	28	1843	47	1860	19		concordant	99.086		1860	19
103.1		1864	27	1851	46	1878	19		concordant	98.5623		1878	19
142.1		1874	28	1864	49	1885	17		concordant	98.8859		1885	17
176.1		1861	28	1827	43	1899	28		concordant	96.2085		1899	28
138.1		2696	33	2755	69	2651	22		concordant	103.923		2651	22
157.1		2622	32	2570	69	2662	11		concordant	96.544		2662	11
156.1		2653	22	2640	45	2662	14		concordant	99.1736		2662	14
127.1		2712	30	2739	66	2690	15		concordant	101.822		2690	15
122.1		1510	21	1379	27	1699	23		discordant	81.1654
146.1		1570	23	1478	35	1696	16		discordant	87.1462
109.1		1631	25	1523	32	1772	30		discordant	85.9481
120.1		1755	27	1695	42	1826	23		discordant	92.8258
175.1		1873	31	1818	50	1933	23		discordant	94.0507
165.1		3194	37	3349	96	3098	11		discordant	108.102
Jacob Quartzite equivalent in Clark Group
Huon River Formation: Scotts Peak Road, -42.91062, 146.36320
2016-129-zr-086		1170	43	1120	39	1270	94		concordant	88.189		1120	39
2016-129-zr-034		1180	32	1124	31	1280	65		concordant	87.8125		1124	31
2016-129-zr-061		1160	21	1154	20	1170	45		concordant	98.6325		1154	20
2016-129-zr-008		1161	25	1156	20	1170	60		concordant	98.8034		1156	20
2016-129-zr-024		1207	17	1202	18	1216	34		concordant	98.8487		1202	18
2016-129-zr-049		1214	15	1215	18	1211	25		concordant	100.33		1215	18
2016-129-zr-066		1221	17	1218	23	1225	24		concordant	99.4286		1218	23
2016-129-zr-045		1249	32	1225	33	1290	65		concordant	94.9612		1225	33
2016-129-zr-116		1260	43	1250	39	1270	94		concordant	98.4252		1250	39
2016-129-zr-021		1300	24	1263	24	1360	49		concordant	92.8676		1263	24
2016-129-zr-099		1317	19	1283	25	1371	27		concordant	93.5813		1283	25
2016-129-zr-051		1347	17	1286	20	1446	29		concordant	88.935		1286	20
2016-129-zr-122		1323	26	1301	32	1360	44		concordant	95.6618		1301	32
2016-129-zr-054		1331	20	1309	21	1366	40		concordant	95.8272		1309	21
2016-129-zr-053		1343	29	1315	27	1390	61		concordant	94.6043		1315	27
2016-129-zr-087		1342	23	1320	27	1375	40		concordant	96		1320	27
2016-129-zr-057		1346	18	1331	22	1368	31		concordant	97.2953		1331	22
2016-129-zr-023		1391	18	1334	22	1479	29		concordant	90.1961		1334	22
2016-129-zr-001		1364	20	1348	23	1388	35		concordant	97.1182		1348	23
2016-129-zr-115		1397	30	1353	34	1460	54		concordant	92.6712		1353	34
2016-129-zr-011		1382	18	1377	24	1388	26		concordant	99.2075		1377	24
2016-129-zr-035		1374	25	1394	30	1340	45		concordant	104.03		1394	30
2016-129-zr-117		1410	19	1413	25	1405	30		concordant	100.569		1405	30
2016-129-zr-083		1444	19	1468	27	1408	26		concordant	104.261		1408	26
2016-129-zr-106		1450	19	1462	27	1433	25		concordant	102.024		1433	25
2016-129-zr-032		1439	14	1442	20	1435	21		concordant	100.488		1435	21
2016-129-zr-085		1438	20	1429	26	1450	34		concordant	98.5517		1450	34
2016-129-zr-041		1443	19	1426	26	1467	29		concordant	97.2052		1467	29
2016-129-zr-027		1491	21	1499	28	1479	33		concordant	101.352		1479	33
2016-129-zr-044		1460	20	1445	26	1481	29		concordant	97.5692		1481	29
2016-129-zr-114		1479	20	1475	27	1485	29		concordant	99.3266		1485	29
2016-129-zr-091		1463	27	1435	32	1503	44		concordant	95.4757		1503	44
2016-129-zr-100		1470	59	1420	62	1540	110		concordant	92.2078		1540	110
2016-129-zr-004		1535	20	1478	28	1614	26		concordant	91.5737		1614	26
2016-129-zr-050		1615	17	1616	24	1614	23		concordant	100.124		1614	23
2016-129-zr-077		1688	18	1711	28	1658	22		concordant	103.197		1658	22
2016-129-zr-048		1670	17	1658	26	1685	22		concordant	98.3976		1685	22
2016-129-zr-003		1714	20	1724	28	1699	28		concordant	101.471		1699	28
2016-129-zr-012		1747	20	1753	29	1740	28		concordant	100.747		1740	28
2016-129-zr-006		1742	17	1734	29	1752	17		concordant	98.9726		1752	17
2016-129-zr-070		1767	19	1778	29	1753	24		concordant	101.426		1753	24
2016-129-zr-055		1769	26	1782	40	1753	31		concordant	101.654		1753	31
2016-129-zr-089		1787	19	1807	30	1763	21		concordant	102.496		1763	21
2016-129-zr-072		1787	21	1797	30	1774	30		concordant	101.297		1774	30
2016-129-zr-029		1816	19	1828	31	1802	20		concordant	101.443		1802	20
2016-129-zr-104		1780	18	1748	29	1817	20		concordant	96.2025		1817	20
2016-129-zr-092		1845	21	1823	31	1870	25		concordant	97.4866		1870	25
2016-129-zr-108		1860	22	1823	31	1901	31		concordant	95.8969		1901	31
2016-129-zr-075		2018	21	2018	39	2017	17		concordant	100.05		2017	17
2016-129-zr-025		1981	22	1939	35	2024	23		concordant	95.8004		2024	23
2016-129-zr-068		2560	21	2531	40	2582	20		concordant	98.0248		2582	20
2016-129-zr-062		2599	20	2614	43	2587	14		concordant	101.044		2587	14
2016-129-zr-073		2720	23	2773	49	2680	20		concordant	103.47		2680	20
2016-129-zr-069		2733	36	2773	73	2702	34		concordant	102.628		2702	34
Discordant Data
2016-129-zr-043		1437	41	1000	46	2157	29		discordant	46.3607
2016-129-zr-103		1186	22	1035	23	1473	37		discordant	70.2648
2016-129-zr-102		1198	19	1039	20	1497	32		discordant	69.4055
2016-129-zr-119		1172	24	1046	24	1410	47		discordant	74.1844
2016-129-zr-088		1369	21	1061	24	1887	22		discordant	56.2268
2016-129-zr-010		1189	32	1105	23	1340	76		discordant	82.4627
2016-129-zr-094		1286	22	1120	24	1574	39		discordant	71.1563
2016-129-zr-096		1343	17	1124	20	1712	25		discordant	65.6542
2016-129-zr-109		1366	24	1126	24	1763	41		discordant	63.8684
2016-129-zr-018		1254	31	1144	28	1450	63		discordant	78.8966
2016-129-zr-060		1251	23	1148	25	1431	42		discordant	80.2236
2016-129-zr-120		1288	30	1175	30	1480	57		discordant	79.3919
2016-129-zr-039		1420	21	1258	24	1671	33		discordant	75.2843
2016-129-zr-017		1448	25	1281	31	1703	35		discordant	75.2202
2016-129-zr-030		1482	16	1299	21	1755	21		discordant	74.0171
2016-129-zr-016		1466	24	1323	33	1680	29		discordant	78.75
2016-129-zr-078		1483	23	1326	27	1715	35		discordant	77.3178
2016-129-zr-079		1527	17	1356	23	1772	17		discordant	76.5237
2016-129-zr-095		1488	19	1404	25	1610	26		discordant	87.205
2016-129-zr-118		1747	30	1432	32	2148	44		discordant	66.6667
2016-129-zr-080		1683	19	1435	26	2007	20		discordant	71.4998
2016-129-zr-076		1523	19	1442	26	1636	26		discordant	88.1418
2016-129-zr-084		1639	19	1445	26	1898	22		discordant	76.1328
2016-129-zr-040		1623	18	1448	26	1857	19		discordant	77.9752
2016-129-zr-098		1636	26	1535	37	1769	31		discordant	86.7722
2016-129-zr-113		1686	25	1549	30	1860	38		discordant	83.2796
2016-129-zr-093		1639	24	1553	30	1750	38		discordant	88.7429
2016-129-zr-022		1678	30	1561	38	1826	46		discordant	85.4874
2016-129-zr-112		1694	25	1584	31	1831	36		discordant	86.5101
2016-129-zr-007		1770	24	1588	31	1992	32		discordant	79.7189
2016-129-zr-019		1706	16	1596	24	1844	19		discordant	86.551
2016-129-zr-005		1787	22	1633	33	1972	24		discordant	82.8093
2016-129-zr-036		1756	19	1666	26	1863	26		discordant	89.4257
2016-129-zr-071		1785	18	1739	29	1838	20		discordant	94.6137
2016-129-zr-026		1822	25	1758	38	1896	28		discordant	92.7215
2016-129-zr-110		2179	26	1782	40	2576	22		discordant	69.177
2016-129-zr-081		2280	26	2037	39	2504	29		discordant	81.3498
2016-129-zr-097		2293	23	2133	43	2438	15		discordant	87.4897
2016-129-zr-074		2322	24	2192	45	2438	15		discordant	89.9098
2016-129-zr-056		2648	21	2521	40	2747	19		discordant	91.7728
2016-129-zr-111		2716	29	2521	60	2864	18		discordant	88.0237
Huon River Formation: Scotts Peak Road, -42.91062, 146.36320
2016-112-zr-027A		1153	25	1176	26	1110	52		concordant	105.946		1153	25
2016-112-zr-027B		1160	21	1144	24	1190	40		concordant	96.1345		1160	21
2016-112-zr-004B		1200	41	1184	35	1220	97		concordant	97.0492		1200	41
2016-112-zr-022		1258	21	1224	27	1315	37		concordant	93.0798		1258	21
2016-112-zr-004A		1294	24	1262	28	1340	45		concordant	94.1791		1294	24
2016-112-zr-025		1296	31	1271	32	1340	63		concordant	94.8507		1296	31
2016-112-zr-020		1367	32	1329	30	1430	68		concordant	92.9371		1367	32
2016-112-zr-015		1410	45	1378	34	1470	99		concordant	93.7415		1410	45
2016-112-zr-011		1483	25	1504	32	1450	38		concordant	103.724		1450	38
2016-112-zr-006		1507	23	1498	31	1517	32		concordant	98.7475		1517	32
2016-112-zr-023		1613	25	1584	35	1649	33		concordant	96.0582		1649	33
2016-112-zr-017		1685	29	1669	37	1703	46		concordant	98.0035		1703	46
2016-112-zr-018		1804	35	1804	52	1804	46		concordant	100		1804	46
2016-112-zr-014		1814	24	1807	36	1823	29		concordant	99.1223		1823	29
2016-112-zr-008		2441	49	2400	92	2477	44		concordant	96.8914		2477	44
Discordant Data
2016-112-zr-016		1839	22	1779	34	1905	25		discordant	93.3858
Irby Siltstone
LA-ICPMS (University of Tasmania)
					Apparent ages (Ma)
Analysis		207Pb*	±1σ	206Pb*	±1σ	206Pb*	±1σ		Overlaps 1:1 concordance at 2s?	6/8 vs 7/6 conc. (%)		Preffered age (1500Ma switch)	±1σ
		235U	(Ma)	238U*	(Ma)	207Pb*	(Ma)					(Ma)	(Ma)
Sample 2016-004: Sisters Beach, -40.90959, 145.54773										#DIV/0!
2016-004-zr-025		1224	22	1244	27	1190	40		concordant	104.538		1244	27
2016-004-zr-047		1258	32	1264	32	1250	67		concordant	101.12		1264	32
2016-004-zr-031		1285	18	1269	25	1312	23		concordant	96.7226		1269	25
2016-004-zr-061		1280	19	1271	26	1292	28		concordant	98.3746		1271	26
2016-004-zr-024		1285	21	1274	28	1303	28		concordant	97.7744		1274	28
2016-004-zr-055		1297	29	1274	31	1340	59		concordant	95.0746		1274	31
2016-004-zr-065		1294	24	1291	28	1300	42		concordant	99.3077		1291	28
2016-004-zr-012		1325	32	1292	35	1380	61		concordant	93.6232		1292	35
2016-004-zr-098		1306	24	1295	31	1324	36		concordant	97.8097		1295	31
2016-004-zr-079		1331	25	1298	32	1384	39		concordant	93.7861		1298	32
2016-004-zr-068		1340	20	1300	27	1405	26		concordant	92.5267		1300	27
2016-004-zr-034		1321	21	1311	31	1337	27		concordant	98.0553		1311	31
2016-004-zr-026		1341	26	1312	31	1390	48		concordant	94.3885		1312	31
2016-004-zr-045		1349	28	1316	30	1400	52		concordant	94		1316	30
2016-004-zr-070		1332	21	1326	30	1342	23		concordant	98.8077		1326	30
2016-004-zr-052		1385	26	1329	35	1473	33		concordant	90.224		1329	35
2016-004-zr-049		1364	30	1332	35	1410	51		concordant	94.4681		1332	35
2016-004-zr-050		1340	23	1347	29	1328	36		concordant	101.431		1347	29
2016-004-zr-059		1385	39	1348	39	1440	80		concordant	93.6111		1348	39
2016-004-zr-082		1365	20	1370	28	1355	22		concordant	101.107		1370	28
2016-004-zr-069		1391	19	1385	29	1399	22		concordant	98.9993		1385	29
2016-004-zr-041		1416	21	1407	30	1429	26		concordant	98.4605		1407	30
2016-004-zr-021		1473	44	1418	35	1550	94		concordant	91.4839		1418	35
2016-004-zr-019		1439	25	1422	31	1462	41		concordant	97.264		1422	31
2016-004-zr-063		1436	20	1443	30	1425	26		concordant	101.263		1443	30
2016-004-zr-042		1452	21	1445	30	1462	29		concordant	98.8372		1445	30
2016-004-zr-004		1491	22	1514	34	1458	29		concordant	103.841		1458	29
2016-004-zr-056		1460	21	1475	31	1437	25		concordant	102.644		1475	31
2016-004-zr-022		1661	20	1663	33	1658	18		concordant	100.302		1658	18
2016-004-zr-089		1645	21	1617	33	1680	22		concordant	96.25		1680	22
2016-004-zr-029		1716	21	1720	35	1710	18		concordant	100.585		1710	18
2016-004-zr-003		1716	20	1717	35	1713	18		concordant	100.234		1713	18
2016-004-zr-007		1710	31	1680	37	1745	52		concordant	96.2751		1745	52
2016-004-zr-058		1771	20	1778	34	1762	14		concordant	100.908		1762	14
2016-004-zr-097		1807	21	1830	37	1779	20		concordant	102.867		1779	20
2016-004-zr-093		1807	26	1762	42	1857	26		concordant	94.8842		1857	26
2016-004-zr-067		2366	22	2384	45	2350	12		concordant	101.447		2350	12
2016-004-zr-020		2456	24	2438	49	2470	15		concordant	98.7045		2470	15
2016-004-zr-037		2715	23	2745	51	2693	16		concordant	101.931		2693	16
Discordant Data
2016-004-zr-016		1791	21	1710	35	1885	16		discordant	90.7162
Irby Siltstone (Sisters Beach, -40.90959, 145.54773)
Reference:	Halpin, J.A., Jensen, T., McGoldrick, P., Meffre, S., Berry, R.F., Everard, J.L., Calver, C.R., Thompson, J., Goemann, K., and Whittaker, J.M., 2014, Authigenic monazite and detrital zircon dating from the Proterozoic Rocky Cape Group, Tasmania: Links to the Belt-Purcell Supergroup, North America: Precambrian Research, v. 250, p. 50–67, doi:10.1016/j.precamres.2014.05.025.
					Apparent ages (Ma)
Analysis		207Pb*	±1σ	206Pb*	±1σ	206Pb*	±1σ		Overlaps 1:1 concordance at 2s?	6/8 vs 7/6 conc. (%)		Preffered age (1500Ma switch)	±1σ
		235U	(Ma)	238U*	(Ma)	207Pb*	(Ma)					(Ma)	(Ma)
OC04B184		1218	28	1183	30	1280	56		concordant	92.4219		1183	30
OC04B159		1245	25	1192	27	1340	47		concordant	88.9552		1192	27
OC04B181		1246	32	1218	30	1290	67		concordant	94.4186		1218	30
OC04B138		1252	22	1234	22	1280	47		concordant	96.4062		1234	22
OC04B193		1271	20	1245	20	1310	41		concordant	95.0382		1245	20
OC04B209		1250	44	1249	30	1240	110		concordant	100.726		1249	30
OC04B118		1268	27	1250	29	1300	55		concordant	96.1538		1250	29
OC04B164		1265	30	1253	29	1280	65		concordant	97.8906		1253	29
OC04B220		1269	27	1254	24	1290	58		concordant	97.2093		1254	24
OC04B120		1269	23	1255	23	1290	49		concordant	97.2868		1255	23
OC04B142		1338	39	1256	37	1470	80		concordant	85.4422		1256	37
OC04B214		1280	67	1260	45	1310	160		concordant	96.1832		1260	45
OC04B137		1300	41	1270	31	1340	94		concordant	94.7761		1270	31
OC04B172		1302	33	1271	29	1350	71		concordant	94.1481		1271	29
OC04B141		1293	23	1273	23	1330	48		concordant	95.7143		1273	23
OC04B135		1305	26	1274	28	1360	51		concordant	93.6765		1274	28
OC04B127		1298	25	1278	24	1330	52		concordant	96.0902		1278	24
OC04B202		1272	22	1278	22	1260	47		concordant	101.429		1278	22
OC04B140		1330	35	1279	34	1410	71		concordant	90.7092		1279	34
OC04B217		1329	17	1279	20	1410	30		concordant	90.7092		1279	20
OC04B157		1268	33	1280	29	1250	74		concordant	102.4		1280	29
OC04B178		1252	32	1285	29	1200	74		concordant	107.083		1285	29
OC04B177		1284	19	1286	20	1280	40		concordant	100.469		1286	20
OC04B126		1310	44	1293	36	1340	99		concordant	96.4925		1293	36
OC04B153		1302	33	1295	28	1310	73		concordant	98.855		1295	28
OC04B194		1307	23	1295	22	1330	48		concordant	97.3684		1295	22
OC04B210		1320	26	1298	24	1350	56		concordant	96.1481		1298	24
OC04B176		1330	47	1299	40	1380	100		concordant	94.1304		1299	40
OC04B182		1299	35	1299	29	1300	81		concordant	99.9231		1299	29
OC04B122		1314	21	1306	22	1326	41		concordant	98.4917		1306	22
OC04B144		1350	48	1309	38	1420	100		concordant	92.1831		1309	38
OC04B213		1366	19	1310	21	1454	35		concordant	90.0963		1310	21
OC04B145		1305	33	1311	31	1290	72		concordant	101.628		1311	31
OC04B148		1349	18	1311	21	1410	32		concordant	92.9787		1311	21
OC04B180		1343	32	1316	30	1390	68		concordant	94.6763		1316	30
OC04B191		1318	23	1317	26	1320	43		concordant	99.7727		1317	26
OC04B173		1348	37	1320	30	1390	83		concordant	94.964		1320	30
OC04B198		1324	27	1321	26	1330	57		concordant	99.3233		1321	26
OC04B147		1338	21	1329	23	1350	42		concordant	98.4444		1329	23
OC04B163		1344	20	1337	23	1353	38		concordant	98.8174		1337	23
OC04B136		1342	18	1341	20	1342	31		concordant	99.9255		1341	20
OC04B199		1360	28	1349	26	1380	59		concordant	97.7536		1349	26
OC04B222		1367	33	1354	31	1390	67		concordant	97.4101		1354	31
OC04B203		1366	21	1363	23	1371	40		concordant	99.4165		1363	23
OC04B218		1384	27	1367	30	1410	49		concordant	96.9504		1367	30
OC04B117		1373	22	1369	23	1377	42		concordant	99.419		1369	23
OC04B179		1384	22	1376	24	1395	43		concordant	98.638		1376	24
OC04B119		1389	25	1379	26	1400	50		concordant	98.5		1379	26
OC04B146		1395	22	1388	23	1405	43		concordant	98.79		1388	23
OC04B192		1412	30	1416	30	1400	62		concordant	101.143		1416	30
OC04B190		1396	23	1420	23	1360	47		concordant	104.412		1420	23
OC04B154		1416	25	1425	25	1400	50		concordant	101.786		1425	25
OC04B166		1437	23	1426	25	1452	42		concordant	98.2094		1426	25
OC04B165		1450	29	1435	35	1470	52		concordant	97.619		1435	35
OC04B125		1475	32	1439	34	1530	60		concordant	94.0523		1439	34
OC04B171		1461	17	1447	22	1481	27		concordant	97.7043		1447	22
OC04B212		1635	27	1599	29	1682	48		concordant	95.0654		1682	48
OC04B162		1655	30	1604	32	1719	52		concordant	93.3101		1719	52
OC04B128		1642	21	1617	29	1674	31		concordant	96.595		1674	31
OC04B156		1655	22	1617	28	1705	35		concordant	94.8387		1705	35
OC04B174		1648	31	1639	34	1660	55		concordant	98.7349		1660	55
OC04B143		1661	20	1641	26	1685	30		concordant	97.3887		1685	30
OC04B201		1654	33	1642	48	1669	43		concordant	98.3823		1669	43
OC04B221		1645	23	1654	28	1634	39		concordant	101.224		1634	39
OC04B196		1691	42	1660	55	1730	64		concordant	95.9538		1730	64
OC04B197		1700	32	1686	51	1717	32		concordant	98.1945		1717	32
OC04B219		1701	26	1691	31	1713	44		concordant	98.7157		1713	44
OC04B130		1710	23	1701	29	1720	37		concordant	98.8953		1720	37
OC04B215		1706	43	1718	44	1690	80		concordant	101.657		1690	80
OC04B183		1751	22	1749	28	1753	36		concordant	99.7718		1753	36
OC04B139		1754	26	1753	31	1755	43		concordant	99.886		1755	43
OC04B175		1750	24	1757	29	1740	38		concordant	100.977		1740	38
OC04B161		1843	28	1816	38	1874	43		concordant	96.905		1874	43
OC04B216		1849	21	1862	29	1835	29		concordant	101.471		1835	29
OC04B155		1341	40	1130	38	1700	72		discordant	66.4706
OC04B211		1248	23	1152	21	1420	49		discordant	81.1268
OC04B160		1321	37	1165	26	1590	82		discordant	73.2704
OC04B200		1290	26	1209	23	1430	55		discordant	84.5455
OC04B129		1368	30	1210	28	1630	60		discordant	74.2331
OC04B124		1390	23	1279	27	1563	35		discordant	81.8298
OC04B208		1536	20	1410	24	1713	30		discordant	82.3117
OC04B195		1626	19	1549	25	1727	26		discordant	89.6931
OC04B123		1686	23	1602	29	1792	37		discordant	89.3973
Humboldt Formation (Irby Siltstone equivalent in Clark Group)
Sample 2015-348: Gordon River Road, -42.73106, 146.47124
2015-348-033		1304	36	1290	33	1330	82		concordant	96.9925		1290	33
2015-348-072		1342	26	1305	27	1400	52		concordant	93.2143		1305	27
2015-348-019		1441	21	1381	28	1529	28		concordant	90.3205		1381	28
2015-348-055		1453	18	1404	25	1525	24		concordant	92.0656		1404	25
2015-348-054		1455	21	1454	27	1456	33		concordant	99.8626		1454	27
2015-348-084		1454	18	1457	26	1448	25		concordant	100.622		1457	26
2015-348-002		1448	20	1461	28	1429	30		concordant	102.239		1461	28
2015-348-050		1453	19	1467	27	1431	26		concordant	102.516		1467	27
2015-348-039		1454	20	1474	28	1425	30		concordant	103.439		1474	28
2015-348-009		1455	21	1476	29	1425	30		concordant	103.579		1476	29
2015-348-027		1463	18	1476	27	1444	21		concordant	102.216		1476	27
2015-348-034		1466	18	1477	27	1450	21		concordant	101.862		1477	27
2015-348-059		1469	19	1484	28	1446	25		concordant	102.628		1484	28
2015-348-053		1488	22	1495	30	1479	33		concordant	101.082		1495	30
2015-348-071		1582	25	1588	32	1574	39		concordant	100.889		1574	39
2015-348-085		1538	28	1509	35	1578	46		concordant	95.6274		1578	46
2015-348-032		1623	19	1623	29	1621	23		concordant	100.123		1621	23
2015-348-021		1719	20	1754	32	1676	22		concordant	104.654		1676	22
2015-348-028		1708	24	1718	35	1694	36		concordant	101.417		1694	36
2015-348-042a		1712	19	1720	32	1701	18		concordant	101.117		1701	18
2015-348-042b		1713	20	1722	31	1701	21		concordant	101.235		1701	21
2015-348-066		1706	20	1708	32	1703	25		concordant	100.294		1703	25
2015-348-063		1717	20	1728	31	1703	25		concordant	101.468		1703	25
2015-348-038		1737	20	1761	31	1706	21		concordant	103.224		1706	21
2015-348-077		1710	20	1710	31	1708	21		concordant	100.117		1708	21
2015-348-060		1736	19	1751	30	1717	21		concordant	101.98		1717	21
2015-348-096		1731	25	1738	35	1722	35		concordant	100.929		1722	35
2015-348-099		1734	25	1740	33	1726	38		concordant	100.811		1726	38
2015-348-095		1682	24	1645	33	1729	31		concordant	95.1417		1729	31
2015-348-001		1741	21	1745	32	1736	28		concordant	100.518		1736	28
2015-348-098		1755	19	1768	31	1738	21		concordant	101.726		1738	21
2015-348-003		1719	19	1697	30	1745	21		concordant	97.2493		1745	21
2015-348-016		1718	26	1694	36	1746	38		concordant	97.0218		1746	38
2015-348-073		1743	23	1739	33	1746	31		concordant	99.5991		1746	31
2015-348-043		1702	22	1664	32	1748	28		concordant	95.1945		1748	28
2015-348-074		1748	22	1748	33	1748	28		concordant	100		1748	28
2015-348-083		1769	19	1786	32	1750	17		concordant	102.057		1750	17
2015-348-068		1757	23	1761	33	1752	31		concordant	100.514		1752	31
2015-348-018		1764	20	1773	32	1753	24		concordant	101.141		1753	24
2015-348-012		1793	21	1823	34	1758	21		concordant	103.697		1758	21
2015-348-013		1711	21	1671	33	1760	24		concordant	94.9432		1760	24
2015-348-051		1746	22	1727	33	1767	27		concordant	97.7363		1767	27
2015-348-091		1692	39	1630	50	1770	61		concordant	92.0904		1770	61
2015-348-049		1739	20	1713	32	1770	20		concordant	96.7797		1770	20
2015-348-048		1760	24	1748	35	1774	30		concordant	98.5344		1774	30
2015-348-011		1797	20	1816	32	1774	24		concordant	102.368		1774	24
2015-348-090		1797	20	1813	32	1777	24		concordant	102.026		1777	24
2015-348-036		1800	22	1820	33	1777	27		concordant	102.42		1777	27
2015-348-041		1801	21	1812	33	1787	27		concordant	101.399		1787	27
2015-348-023		1808	22	1825	35	1787	24		concordant	102.126		1787	24
2015-348-067		1798	21	1805	32	1789	27		concordant	100.894		1789	27
2015-348-044		1753	21	1722	33	1790	23		concordant	96.2011		1790	23
2015-348-040		1810	20	1823	34	1794	20		concordant	101.616		1794	20
2015-348-079		1874	21	1879	34	1866	22		concordant	100.697		1866	22
2015-348-022		1893	22	1915	37	1868	22		concordant	102.516		1868	22
2015-348-052		2484	20	2496	40	2474	15		concordant	100.889		2474	15
2015-348-088		2453	22	2412	43	2487	19		concordant	96.9843		2487	19
2015-348-070		2605	24	2643	48	2575	22		concordant	102.641		2575	22
2015-348-081		2631	22	2625	47	2635	15		concordant	99.6205		2635	15
2015-348-076		2730	22	2763	47	2705	16		concordant	102.144		2705	16
2015-348-057		2719	25	2728	52	2712	20		concordant	100.59		2712	20
2015-348-078		2723	26	2717	47	2727	30		concordant	99.6333		2727	30
Discordant Data
2015-348-056		1690	21	1642	32	1750	24		discordant	93.8286
2015-348-015		1770	27	1693	33	1862	41		discordant	90.9237
2015-348-082		1770	22	1718	33	1833	26		discordant	93.7261
2015-348-030		1836	26	1760	40	1922	31		discordant	91.5713
Humboldt Formation (Clark Group), Sample 2016-106, Gordon River Road, -42.72678, 146.45948
2016-106-zr-040		1250	34	1205	33	1330	68		concordant	90.6015		1205	33
2016-106-zr-014		1437	25	1432	30	1444	42		concordant	99.169		1432	30
2016-106-zr-022		1465	25	1464	34	1467	37		concordant	99.7955		1464	34
2016-106-zr-037		1480	26	1471	35	1493	37		concordant	98.5265		1471	35
2016-106-zr-052		1595	26	1582	33	1610	41		concordant	98.2609		1610	41
2016-106-zr-002		1621	27	1624	36	1618	41		concordant	100.371		1618	41
2016-106-zr-015		1634	23	1620	33	1651	29		concordant	98.1224		1651	29
2016-106-zr-043		1643	26	1625	35	1664	40		concordant	97.6562		1664	40
2016-106-zr-055		1678	29	1688	43	1664	36		concordant	101.442		1664	36
2016-106-zr-059A		1698	26	1725	38	1665	33		concordant	103.604		1665	33
2016-106-zr-034		1634	30	1595	37	1683	47		concordant	94.7712		1683	47
2016-106-zr-059B		1697	23	1686	35	1708	32		concordant	98.7119		1708	32
2016-106-zr-016		1717	27	1712	41	1724	35		concordant	99.3039		1724	35
2016-106-zr-019		1738	22	1745	35	1729	21		concordant	100.925		1729	21
2016-106-zr-050		1765	26	1776	39	1752	31		concordant	101.37		1752	31
2016-106-zr-051		1720	26	1690	39	1755	31		concordant	96.2963		1755	31
2016-106-zr-053		1765	33	1769	48	1760	44		concordant	100.511		1760	44
2016-106-zr-026		1758	28	1753	38	1762	41		concordant	99.4892		1762	41
2016-106-zr-013		1740	25	1716	37	1767	34		concordant	97.1138		1767	34
2016-106-zr-044		1758	22	1750	33	1767	24		concordant	99.0379		1767	24
2016-106-zr-049		1756	25	1746	38	1769	27		concordant	98.6998		1769	27
2016-106-zr-039		1820	24	1849	38	1785	27		concordant	103.585		1785	27
2016-106-zr-045		1778	23	1758	37	1800	27		concordant	97.6667		1800	27
2016-106-zr-048		1790	26	1778	39	1805	33		concordant	98.5042		1805	33
2016-106-zr-041		1754	28	1707	37	1810	40		concordant	94.3094		1810	40
2016-106-zr-035		1800	23	1786	36	1815	26		concordant	98.4022		1815	26
2016-106-zr-030		1822	25	1818	36	1823	33		concordant	99.7257		1823	33
2016-106-zr-010		1776	38	1732	52	1828	52		concordant	94.7484		1828	52
2016-106-zr-036		1790	76	1760	100	1830	110		concordant	96.1749		1830	110
2016-106-zr-046		1831	34	1819	42	1844	55		concordant	98.6443		1844	55
2016-106-zr-054		1859	29	1838	46	1881	35		concordant	97.714		1881	35
2016-106-zr-060		1874	28	1866	39	1882	41		concordant	99.1498		1882	41
2016-106-zr-006		2019	23	1974	39	2063	25		concordant	95.6859		2063	25
2016-106-zr-047		2183	50	2130	87	2230	47		concordant	95.5157		2230	47
2016-106-zr-033		2532	37	2552	61	2515	45		concordant	101.471		2515	45
2016-106-zr-056		2586	25	2617	52	2562	18		concordant	102.147		2562	18
2016-106-zr-057		2788	23	2800	50	2779	17		concordant	100.756		2779	17
Discordant Data
2016-106-zr-021		1607	23	1560	33	1667	29		discordant	93.5813
2016-106-zr-004		1687	22	1637	33	1750	24		discordant	93.5429
2016-106-zr-061		1697	23	1648	35	1757	27		discordant	93.7962
2016-106-zr-005		1726	27	1664	38	1800	36		discordant	92.4444
Humboldt Formation (Clark Group), Sample 2016-107, Gordon River Road, -42.72678, 146.45948
2016-107-zr-002		1358	24	1355	30	1364	40		concordant	99.3402		1358	24
2016-107-zr-018		1444	23	1432	30	1460	37		concordant	98.0822		1444	23
2016-107-zr-011		1483	35	1515	39	1440	67		concordant	105.208		1483	35
2016-107-zr-041		1544	29	1494	35	1612	49		concordant	92.6799		1544	29
2016-107-zr-013		1581	21	1546	32	1627	22		concordant	95.0215		1627	22
2016-107-zr-044		1638	24	1642	33	1633	37		concordant	100.551		1633	37
2016-107-zr-014		1658	24	1677	35	1633	33		concordant	102.694		1633	33
2016-107-zr-038		1620	25	1587	34	1660	36		concordant	95.6024		1660	36
2016-107-zr-026		1669	25	1673	35	1662	36		concordant	100.662		1662	36
2016-107-zr-039		1657	50	1639	43	1680	100		concordant	97.5595		1680	100
2016-107-zr-010		1757	27	1758	38	1757	38		concordant	100.057		1757	38
2016-107-zr-015		1793	24	1816	37	1765	27		concordant	102.89		1765	27
2016-107-zr-007		1731	40	1690	63	1777	40		concordant	95.1041		1777	40
2016-107-zr-033		1792	27	1802	41	1779	34		concordant	101.293		1779	34
2016-107-zr-036		1836	30	1878	43	1787	43		concordant	105.092		1787	43
2016-107-zr-035		1736	46	1690	60	1790	67		concordant	94.4134		1790	67
2016-107-zr-015B		1801	25	1808	37	1792	33		concordant	100.893		1792	33
2016-107-zr-008		1760	26	1727	37	1799	37		concordant	95.9978		1799	37
2016-107-zr-032		1780	26	1751	39	1812	30		concordant	96.6336		1812	30
2016-107-zr-031		1854	23	1856	37	1851	26		concordant	100.27		1851	26
2016-107-zr-027		1873	23	1891	38	1852	23		concordant	102.106		1852	23
2016-107-zr-045		1845	45	1800	58	1890	72		concordant	95.2381		1890	72
2016-107-zr-006		1880	26	1862	41	1899	28		concordant	98.0516		1899	28
2016-107-zr-009		1989	24	1961	41	2018	23		concordant	97.1754		2018	23
Discordant Data
2016-107-zr-034A		1799	31	1727	43	1882	41		discordant	91.7641
Humboldt Formation (Clark Group), Sample 2016-579, Gordon River Road, -42.73338, 146.47889
2015-579-zr-049		1319	29	1312	26	1330	63		concordant	98.6466		1319	29
2015-579-zr-031		1432	18	1426	26	1439	25		concordant	99.0966		1432	18
2015-579-zr-009		1435	20	1448	26	1414	30		concordant	102.405		1435	20
2015-579-zr-062		1440	27	1432	32	1450	46		concordant	98.7586		1440	27
2015-579-zr-023		1442	21	1438	26	1446	34		concordant	99.4467		1442	21
2015-579-zr-040		1456	19	1468	27	1437	25		concordant	102.157		1456	19
2015-579-zr-061		1464	27	1445	33	1491	45		concordant	96.9148		1464	27
2015-579-zr-025		1514	20	1546	29	1469	25		concordant	105.242		1469	25
2015-579-zr-019		1482	20	1503	29	1452	29		concordant	103.512		1482	20
2015-579-zr-013		1574	22	1596	32	1545	31		concordant	103.301		1545	31
2015-579-zr-039		1662	23	1675	35	1645	26		concordant	101.824		1645	26
2015-579-zr-021		1689	27	1716	37	1655	40		concordant	103.686		1655	40
2015-579-zr-041		1705	24	1716	37	1691	29		concordant	101.478		1691	29
2015-579-zr-046		1722	18	1744	29	1694	21		concordant	102.952		1694	21
2015-579-zr-030		1699	24	1693	36	1705	28		concordant	99.2962		1705	28
2015-579-zr-038		1724	18	1739	29	1705	21		concordant	101.994		1705	21
2015-579-zr-052		1712	18	1716	28	1706	21		concordant	100.586		1706	21
2015-579-zr-036		1717	18	1724	28	1706	21		concordant	101.055		1706	21
2015-579-zr-010		1723	19	1734	29	1708	25		concordant	101.522		1708	25
2015-579-zr-037		1720	18	1720	28	1719	21		concordant	100.058		1719	21
2015-579-zr-024		1699	22	1671	35	1733	24		concordant	96.4224		1733	24
2015-579-zr-051		1724	23	1711	37	1740	24		concordant	98.3333		1740	24
2015-579-zr-054		1727	18	1711	28	1745	21		concordant	98.0516		1745	21
2015-579-zr-059		1707	22	1666	35	1757	24		concordant	94.8207		1757	24
2015-579-zr-011		1753	18	1748	29	1758	21		concordant	99.4312		1758	21
2015-579-zr-015		1756	19	1748	29	1763	24		concordant	99.1492		1763	24
2015-579-zr-017		1777	19	1787	30	1765	21		concordant	101.246		1765	21
2015-579-zr-026		1730	23	1697	36	1769	24		concordant	95.9299		1769	24
2015-579-zr-004		1766	18	1763	29	1770	20		concordant	99.6045		1770	20
2015-579-zr-008		1767	42	1763	29	1770	84		concordant	99.6045		1770	84
2015-579-zr-028		1749	26	1724	38	1777	34		concordant	97.0174		1777	34
2015-579-zr-056		1791	19	1787	30	1795	23		concordant	99.5543		1795	23
2015-579-zr-007		1811	19	1823	31	1797	20		concordant	101.447		1797	20
2015-579-zr-027		1819	18	1828	31	1807	17		concordant	101.162		1807	17
2015-579-zr-044		1827	20	1838	32	1813	23		concordant	101.379		1813	23
2015-579-zr-029		1833	47	1810	72	1855	57		concordant	97.5741		1855	57
2015-579-zr-055		1868	19	1876	33	1859	16		concordant	100.914		1859	16
2015-579-zr-045		1832	19	1797	30	1871	22		concordant	96.0449		1871	22
2015-579-zr-042		2000	22	1993	37	2007	23		concordant	99.3024		2007	23
2015-579-zr-005		2492	19	2511	39	2476	15		concordant	101.414		2476	15
2015-579-zr-001		2686	22	2691	46	2681	18		concordant	100.373		2681	18
2015-579-zr-058		2676	21	2646	44	2697	16		concordant	98.109		2697	16
2015-579-zr-002		2726	22	2703	46	2742	18		concordant	98.5777		2742	18
2015-579-zr-022		3287	27	3276	68	3294	15		concordant	99.4536		3294	15
Discordant Data
2015-579-zr-012		1879	19	1828	31	1934	18		discordant	94.5191

## Sheet: SW Laurentia
Unkar Group, Dox Formation (Grand Canyon)
Reference: Mulder, J. A., Karlstrom, K. E. Fletcher, K., Heizler, M. T., Timmons, J. M., Crossey, L. J., Gehrels, G. E., and Pecha, M., 2017, The syn-orogenic sedimentary record of the Grenville Orogeny in southwest Laurentia. Precambrian Research, v. 294, 33–52, doi:10.1016/j.precamres.2017.03.006
					Apparent ages (Ma)
Analysis		207Pb*	±1σ	206Pb*	±1σ	206Pb*	±1σ		Overlaps 1:1 concordance at 2s?	6/8 vs 7/6 conc. (%)		Preffered age (1500Ma switch)	±1σ
		235U	(Ma)	238U*	(Ma)	207Pb*	(Ma)					(Ma)	(Ma)
T1269-1- Ochoa Point
		528.387	48.5874	574.121	16.6425	335.412	258.832		concordant	171.169		574.121	16.6425
		1086.38	12.871	1071.86	13.6945	1115.57	26.7688		concordant	96.082		1071.86	13.6945
		1121.68	17.794	1120.72	12.2573	1123.55	46.5324		concordant	99.7486		1120.72	12.2573
		1160.98	54.3717	1136.67	78.6566	1206.65	42.7093		concordant	94.2005		1136.67	78.6566
		1145.36	16.2154	1137.83	20.6785	1159.62	25.4488		concordant	98.1211		1137.83	20.6785
		1205.2	12.0716	1173.2	15.3247	1263	18.3894		concordant	92.8902		1173.2	15.3247
		1275.43	41.1875	1197.7	56.1933	1408.9	45.7028		concordant	85.0097		1197.7	56.1933
		1297.72	64.6952	1226.36	74.2633	1417.75	110.872		concordant	86.5007		1226.36	74.2633
		1236.71	8.50655	1227.85	8.99418	1252.16	17.1311		concordant	98.0582		1227.85	8.99418
		1224.32	33.9738	1231.92	27.9215	1210.93	80.2		concordant	101.733		1231.92	27.9215
		1254.33	17.0488	1245.89	18.7068	1268.85	33.0906		concordant	98.1906		1245.89	18.7068
		1297.83	31.2213	1258.71	43.3186	1363.12	37.5601		concordant	92.3401		1258.71	43.3186
		1291.48	27.0396	1271.14	36.6868	1325.43	36.6011		concordant	95.9037		1271.14	36.6868
		1380.8	16.6192	1309.52	14.7957	1492.76	34.3249		concordant	87.7253		1309.52	14.7957
		1339.88	29.1404	1317.79	40.7639	1375.32	36.6583		concordant	95.8171		1317.79	40.7639
		1380.58	22.2886	1322.98	31.4107	1470.8	25.6279		concordant	89.9496		1322.98	31.4107
		1324.42	32.385	1333.86	32.9309	1309.15	66.3322		concordant	101.888		1333.86	32.9309
		1323.09	16.0424	1336.19	14.3307	1301.92	35.2525		concordant	102.633		1336.19	14.3307
		1379.02	50.8007	1346.2	25.6699	1430.19	122.064		concordant	94.1274		1346.2	25.6699
		1378.78	32.7876	1346.23	48.1206	1429.54	34.1395		concordant	94.1725		1346.23	48.1206
		1376.22	29.8284	1348.16	45.9734	1420.02	22.4371		concordant	94.9391		1348.16	45.9734
		1373.08	18.6209	1348.61	25.0794	1411.32	26.1703		concordant	95.5562		1348.61	25.0794
		1404.74	28.5586	1348.75	32.9983	1490.75	49.1211		concordant	90.4745		1348.75	32.9983
		1376.49	39.9689	1352.53	63.7188	1413.84	17.3682		concordant	95.6635		1352.53	63.7188
		1382.42	10.74	1366.78	13.0649	1406.63	18.1374		concordant	97.1666		1366.78	13.0649
		1417.13	39.1501	1378.9	63.2126	1475.04	10.6059		concordant	93.4822		1378.9	63.2126
		1382.69	8.40069	1380.69	11.3969	1385.76	12.0888		concordant	99.634		1380.69	11.3969
		1417.14	14.1331	1384.87	17.2685	1465.96	23.2823		concordant	94.4682		1384.87	17.2685
		1376.15	34.442	1386.98	21.0061	1359.36	81.8986		concordant	102.032		1386.98	21.0061
		1390.46	9.84176	1389.47	8.99507	1391.97	20.7644		concordant	99.82		1389.47	8.99507
		1384.52	54.1514	1400.1	35.3151	1360.58	127.029		concordant	102.905		1400.1	35.3151
		1392.8	10.8074	1401.13	12.8834	1380.06	19.0941		concordant	101.526		1401.13	12.8834
		1417.98	15.2325	1401.39	23.6611	1442.97	12.7012		concordant	97.1183		1401.39	23.6611
		1430.62	14.8615	1432.04	16.216	1428.49	28.0388		concordant	100.249		1432.04	16.216
		1434.6	11.8837	1434.2	14.6706	1435.18	19.9245		concordant	99.9321		1434.2	14.6706
		1440.62	26.3693	1441.39	14.2936	1439.48	61.8083		concordant	100.133		1441.39	14.2936
		1459.58	19.9407	1445.62	22.8532	1479.93	35.5623		concordant	97.6816		1445.62	22.8532
		1454.23	7.83612	1445.72	10.1308	1466.68	12.248		concordant	98.5709		1445.72	10.1308
		1460.5	16.9061	1446.78	17.1086	1480.49	32.9575		concordant	97.7229		1446.78	17.1086
		1445.81	14.8576	1450.14	21.4149	1439.45	19.0098		concordant	100.742		1450.14	21.4149
		1478.32	41.7055	1452.24	32.7364	1515.94	89.1857		concordant	95.7979		1452.24	32.7364
		1479.31	39.9238	1454.84	30.289	1514.57	86.191		concordant	96.0563		1454.84	30.289
		1451.42	26.8756	1455.76	36.4176	1445.04	39.482		concordant	100.742		1455.76	36.4176
		1464.58	27.0416	1457.65	17.3727	1474.63	61.1488		concordant	98.8484		1457.65	17.3727
		1461.05	26.6381	1458.51	19.7295	1464.72	58.6823		concordant	99.5759		1458.51	19.7295
		1466.04	14.7587	1462.1	18.8192	1471.73	23.627		concordant	99.3456		1462.1	18.8192
		1463.57	17.7586	1462.34	14.6195	1465.35	37.9902		concordant	99.7945		1462.34	14.6195
		1459.12	28.6562	1471.89	42.5522	1440.54	34.3161		concordant	102.176		1471.89	42.5522
		1474.57	9.3169	1475.47	12.5174	1473.26	13.868		concordant	100.15		1475.47	12.5174
		1535.67	34.0649	1551.62	56.5361	1513.76	24.5826		concordant	102.501		1513.76	24.5826
		1515.41	24.0707	1507.03	33.5331	1527.12	33.2901		concordant	98.6843		1527.12	33.2901
		1651.86	51.091	1669.64	87.9321	1629.29	34.3927		concordant	102.477		1629.29	34.3927
		1638.19	11.2571	1634.54	15.4562	1642.85	16.2899		concordant	99.494		1642.85	16.2899
		1704.61	12.4113	1719.62	20.962	1686.21	10.5896		concordant	101.982		1686.21	10.5896
		1675.35	20.4837	1621.81	23.0472	1743.07	35.0051		concordant	93.0433		1743.07	35.0051
		1828.76	27.3313	1849.77	49.3805	1804.92	17.8159		concordant	102.485		1804.92	17.8159
		1812.06	15.051	1815.25	22.2302	1808.38	19.8951		concordant	100.38		1808.38	19.8951
		1803.23	23.0969	1784.99	41.8059	1824.37	10.0508		concordant	97.8412		1824.37	10.0508
		1856.69	29.0959	1865.96	45.181	1846.3	35.6029		concordant	101.065		1846.3	35.6029
		1827.54	78.899	1791.14	144.424	1869.26	18.5429		concordant	95.8211		1869.26	18.5429
		1880.02	9.18803	1877.84	14.6879	1882.41	10.4898		concordant	99.757		1882.41	10.4898
		2049.67	11.9504	2051.29	16.4373	2048.02	17.3692		concordant	100.16		2048.02	17.3692
		2708.39	17.7841	2738.6	40.0795	2685.91	9.27882		concordant	101.961		2685.91	9.27882
		1250.43	28.5005	1104.1	22.7641	1512.03	61.677		discordant	73.0208
T1269-2-Escalante Creek Member
		1122.85	25.9352	1041.36	20.0738	1284.07	62.2529		concordant	81.0985		1041.36	20.0738
		1157.92	58.1309	1109.98	80.8994	1248.81	54.4099		concordant	88.8827		1109.98	80.8994
		1115.53	11.6488	1112.16	12.1662	1122.09	24.7565		concordant	99.1157		1112.16	12.1662
		1166.81	39.1243	1147.47	34.9091	1202.86	89.8247		concordant	95.3952		1147.47	34.9091
		1186.34	44.2408	1152.35	64.7286	1248.85	29.6711		concordant	92.2725		1152.35	64.7286
		1163.78	15.6298	1159.3	20.9135	1172.14	21.7258		concordant	98.9048		1159.3	20.9135
		1172.05	17.4777	1166.24	20.5615	1182.8	31.8824		concordant	98.5996		1166.24	20.5615
		1190.75	46.8029	1166.6	70.0324	1234.87	23.5305		concordant	94.4719		1166.6	70.0324
		1209.56	14.5072	1188.88	16.0862	1246.69	27.7887		concordant	95.3632		1188.88	16.0862
		1254.82	67.3087	1195.07	44.8013	1358.8	161.757		concordant	87.9505		1195.07	44.8013
		1231.03	17.4205	1196.58	14.1045	1291.87	40.3177		concordant	92.6235		1196.58	14.1045
		1225.14	24.8128	1212.46	29.0381	1247.53	44.8789		concordant	97.1887		1212.46	29.0381
		1211.42	21.8474	1216.29	16.5877	1202.77	53.2328		concordant	101.123		1216.29	16.5877
		1216.35	23.8507	1218.07	34.3796	1213.29	25.7999		concordant	100.394		1218.07	34.3796
		1236.17	21.725	1226.94	26.1818	1252.28	37.8523		concordant	97.9762		1226.94	26.1818
		1231.97	11.069	1227.29	15.124	1240.17	14.8554		concordant	98.9617		1227.29	15.124
		1233.11	23.3289	1232.17	27.8133	1234.78	41.709		concordant	99.7884		1232.17	27.8133
		1214.41	36.031	1233.25	8.68709	1181.09	99.4005		concordant	104.416		1233.25	8.68709
		1252.35	18.722	1240.66	21.3263	1272.5	34.8657		concordant	97.4978		1240.66	21.3263
		1266.73	40.9373	1241.3	38.0028	1310.14	88.1885		concordant	94.7454		1241.3	38.0028
		1268.54	28.0267	1243.61	41.6386	1311.05	23.0653		concordant	94.856		1243.61	41.6386
		1317.11	53.7734	1251.17	80.5926	1426.1	31.9252		concordant	87.7336		1251.17	80.5926
		1267.01	31.2621	1252.68	29.3565	1291.4	67.4015		concordant	97.0012		1252.68	29.3565
		1301.16	60.4979	1266.54	34.479	1358.71	148.116		concordant	93.2164		1266.54	34.479
		1331.52	60.2909	1268.05	89.3685	1435.11	45.307		concordant	88.3587		1268.05	89.3685
		1369.61	51.5247	1272.68	61.4832	1524.17	81.1971		concordant	83.5		1272.68	61.4832
		1265.37	42.0394	1276.23	62.5706	1246.94	41.7003		concordant	102.349		1276.23	62.5706
		1283.91	55.3267	1281	27.6445	1288.77	140.375		concordant	99.3969		1281	27.6445
		1385.33	33.9365	1294.55	38.0317	1528.06	58.4555		concordant	84.7184		1294.55	38.0317
		1316.53	17.2608	1318.21	20.8187	1313.77	30.2009		concordant	100.338		1318.21	20.8187
		1302.18	47.9516	1324.67	54.3069	1265.3	91.7893		concordant	104.692		1324.67	54.3069
		1342.3	23.5914	1329.14	23.7309	1363.34	47.6944		concordant	97.4918		1329.14	23.7309
		1325.17	13.4239	1330.09	10.1718	1317.22	31.1022		concordant	100.977		1330.09	10.1718
		1309.15	41.3035	1331.99	63.6892	1271.92	36.364		concordant	104.723		1331.99	63.6892
		1392.04	42.2293	1334.79	65.7669	1480.88	21.4514		concordant	90.1348		1334.79	65.7669
		1350.15	23.1745	1334.85	16.0473	1374.47	53.9161		concordant	97.1173		1334.85	16.0473
		1343.22	14.608	1348.22	12.507	1335.24	32.2934		concordant	100.973		1348.22	12.507
		1388.19	22.0432	1353.46	34.1549	1441.96	15.4555		concordant	93.8621		1353.46	34.1549
		1370.51	14.6265	1362.16	15.1646	1383.53	28.8547		concordant	98.4559		1362.16	15.1646
		1363.27	20.0955	1375.09	21.3263	1344.77	39.6169		concordant	102.255		1375.09	21.3263
		1444.81	18.3901	1378.13	25.6538	1544.32	22.3863		concordant	89.2387		1378.13	25.6538
		1364.56	34.3133	1381.23	32.9197	1338.52	72.0045		concordant	103.191		1381.23	32.9197
		1411.01	24.8567	1389.34	40.0145	1443.87	11.679		concordant	96.2229		1389.34	40.0145
		1417.34	37.6334	1390.57	57.2814	1457.78	34.4062		concordant	95.3896		1390.57	57.2814
		1404.55	31.4712	1393.96	42.2315	1420.64	45.8411		concordant	98.122		1393.96	42.2315
		1403.59	16.7173	1394.4	25.4	1417.56	16.3076		concordant	98.3664		1394.4	25.4
		1405.05	19.9016	1399.24	19.4638	1413.86	40.332		concordant	98.966		1399.24	19.4638
		1407.94	10.17	1421.1	9.70706	1388.06	21.0617		concordant	102.38		1421.1	9.70706
		1439.61	18.1481	1422.69	27.7028	1464.68	17.5517		concordant	97.1331		1422.69	27.7028
		1425.7	19.4472	1423.78	21.4298	1428.53	36.374		concordant	99.6675		1423.78	21.4298
		1434.59	10.785	1432.99	9.22598	1436.94	23.0048		concordant	99.7254		1432.99	9.22598
		1471.48	38.9061	1433.55	53.0556	1526.62	53.3297		concordant	93.9036		1433.55	53.0556
		1417.7	18.788	1437.47	16.164	1388.12	40.5967		concordant	103.555		1437.47	16.164
		1454.65	20.6376	1439.9	28.5462	1476.25	28.3379		concordant	97.5372		1439.9	28.5462
		1451.72	13.2272	1447.78	16.515	1457.48	21.7716		concordant	99.3347		1447.78	16.515
		1453.24	39.7402	1448.14	26.843	1460.7	89.486		concordant	99.1401		1448.14	26.843
		1460.59	37.8237	1449.98	37.4485	1476.05	74.7393		concordant	98.2337		1449.98	37.4485
		1452.95	9.55526	1452.95	12.1553	1452.92	15.4148		concordant	100.002		1452.95	12.1553
		1469.66	36.4782	1453.99	54.6576	1492.34	39.7708		concordant	97.4308		1453.99	54.6576
		1471.35	46.6993	1455.85	72.0269	1493.78	44.4938		concordant	97.4607		1455.85	72.0269
		1487.42	19.0453	1456.59	26.387	1531.64	25.6317		concordant	95.1001		1456.59	26.387
		1457.6	21.5544	1457.18	30.5415	1458.19	28.6778		concordant	99.9306		1457.18	30.5415
		1474.01	14.8224	1458.36	22.3392	1496.59	15.8651		concordant	97.4454		1458.36	22.3392
		1460.22	20.2671	1462.83	12.2447	1456.41	46.4877		concordant	100.441		1462.83	12.2447
		1467.26	54.4298	1463.62	20.9451	1472.51	129.615		concordant	99.3966		1463.62	20.9451
		1490.95	12.4196	1507.38	12.0353	1467.63	24.93		concordant	102.708		1467.63	24.93
		1468.03	17.9831	1469.29	20.6013	1466.2	32.3915		concordant	100.211		1469.29	20.6013
		1462.4	16.0039	1469.88	22.0555	1451.54	22.9104		concordant	101.263		1469.88	22.0555
		1489.52	31.5657	1503.29	51.0439	1469.95	25.6498		concordant	102.269		1469.95	25.6498
		1484.4	15.0518	1470.96	23.2877	1503.64	14.49		concordant	97.8265		1470.96	23.2877
		1470.59	10.1315	1472.43	12.2182	1467.91	17.3986		concordant	100.308		1472.43	12.2182
		1476.98	13.3304	1473.83	17.3923	1481.5	20.6822		concordant	99.4821		1473.83	17.3923
		1465.2	20.9128	1477.3	11.853	1447.68	48.416		concordant	102.046		1477.3	11.853
		1462.5	18.0277	1477.68	29.1541	1440.51	13.9723		concordant	102.581		1477.68	29.1541
		1474.51	42.3919	1479.06	27.5898	1467.95	95.6068		concordant	100.757		1479.06	27.5898
		1478.73	18.8596	1483.45	29.0485	1471.94	19.5318		concordant	100.782		1483.45	29.0485
		1478.39	36.0062	1484.65	53.1798	1469.4	43.6506		concordant	101.038		1484.65	53.1798
		1471.44	34.2101	1486.55	56.0768	1449.69	23.5449		concordant	102.543		1486.55	56.0768
		1527.8	32.6734	1554.4	53.798	1491.15	26.2894		concordant	104.242		1491.15	26.2894
		1479.7	15.0865	1496.08	17.695	1456.27	26.8594		concordant	102.733		1496.08	17.695
		1483.88	22.3953	1498.35	35.193	1463.24	21.7827		concordant	102.399		1498.35	35.193
		1511.25	16.3146	1499.15	21.5054	1528.24	24.7103		concordant	98.0968		1499.15	21.5054
		1608.49	22.4226	1621.84	25.6084	1591.04	39.7478		concordant	101.936		1591.04	39.7478
		1864.49	28.3834	1891.7	53.8384	1834.27	9.39297		concordant	103.131		1834.27	9.39297
		1865.62	15.3239	1875.47	26.3485	1854.65	13.9974		concordant	101.122		1854.65	13.9974
		1911.23	18.0116	1939.63	34.0775	1880.54	8.79763		concordant	103.142		1880.54	8.79763
		1887.99	13.9636	1893.33	22.9431	1882.12	15.0434		concordant	100.596		1882.12	15.0434
		1799.21	71.6379	1725.87	128.312	1885.29	8.49397		concordant	91.544		1885.29	8.49397
		1699.23	17.2312	1629.81	28.0416	1785.93	13.7716		discordant	91.2587
		1769.66	16.0683	1704.24	19.8336	1847.75	25.097		discordant	92.2335
Reference: Bloch, J., Timmons, M., Crossey, L.J., Gehrels, G.E., Karlstrom, K.E., 2006. Mudstone petrology of the Mesoproterozoic Unkar Group, Grand Canyon, U.S.A.: Provenance, weathering, and sediment transport on intracratonic Rodinia. J. Sediment. Res. 76, 1106–1119.
					Apparent ages (Ma)
Analysis		207Pb*	±1σ	206Pb*	±1σ	206Pb*	±1σ		Overlaps 1:1 concordance at 2s?	6/8 vs 7/6 conc. (%)		Preffered age (1500Ma switch)	±1σ
		235U	(Ma)	238U*	(Ma)	207Pb*	(Ma)					(Ma)	(Ma)
T02-73-1Z
		1084.9	130.3	1031.5	12.4	1194	70		concordant	86.3903		1031.5	12.4
		1042.6	92.5	1054.5	14.9	1018	52		concordant	103.585		1054.5	14.9
		1108.3	155.8	1067.4	28.1	1189	79		concordant	89.7729		1067.4	28.1
		1131.2	34.8	1071.6	11.2	1247	14		concordant	85.9342		1071.6	11.2
		1130.7	25.4	1091.5	7.3	1207	11		concordant	90.4308		1091.5	7.3
		1139.2	70.7	1102.7	22.8	1209	29		concordant	91.2076		1102.7	22.8
		1122.2	88.4	1104.1	15.4	1157	43		concordant	95.4278		1104.1	15.4
		1136.9	57.6	1114.1	11.7	1181	26		concordant	94.3353		1114.1	11.7
		1138.7	317.5	1119.4	19.5	1176	175		concordant	95.1871		1119.4	19.5
		1191.2	117.2	1127.7	11.7	1308	52		concordant	86.2156		1127.7	11.7
		1165.5	47.5	1131.2	17.8	1230	17		concordant	91.9675		1131.2	17.8
		1154.1	37.2	1132.6	9.7	1195	16		concordant	94.7782		1132.6	9.7
		1194.9	31.1	1138.7	14.2	1298	8		concordant	87.7273		1138.7	14.2
		1115.1	95.2	1141.2	21.7	1065	46		concordant	107.155		1141.2	21.7
		1209	29.6	1157.7	7.7	1302	11		concordant	88.9171		1157.7	7.7
		1168.2	101.3	1160.5	17	1183	46		concordant	98.0981		1160.5	17
		1174.7	142.5	1164.6	11.5	1193	68		concordant	97.6194		1164.6	11.5
		1165.3	47.9	1169.2	20.4	1158	16		concordant	100.967		1169.2	20.4
		1187	31.8	1172.4	14.1	1214	9		concordant	96.5733		1172.4	14.1
		1294	42.1	1193.4	10.5	1465	14		concordant	81.4608		1193.4	10.5
		1188.3	73.4	1193.6	13	1179	32		concordant	101.238		1193.6	13
		1280.9	180.7	1194.1	21	1430	72		concordant	83.5035		1194.1	21
		1175.5	57.2	1195.1	18.4	1140	22		concordant	104.833		1195.1	18.4
		1281.9	85.7	1206.1	14	1411	32		concordant	85.4784		1206.1	14
		1287.1	73.3	1214.1	7.1	1411	28		concordant	86.0454		1214.1	7.1
		1301.7	97.7	1222.8	14.5	1434	36		concordant	85.272		1222.8	14.5
		1260.2	65.2	1235.8	6.8	1302	26		concordant	94.9155		1235.8	6.8
		1240.5	29.9	1237.4	9.7	1246	10		concordant	99.3098		1237.4	9.7
		1245.2	48.8	1241.6	8.6	1251	19		concordant	99.2486		1241.6	8.6
		1249.2	38.2	1241.7	5.3	1262	15		concordant	98.3914		1241.7	5.3
		1252.1	38.9	1243.7	14	1267	12		concordant	98.161		1243.7	14
		1265.9	42.9	1249	8.3	1295	16		concordant	96.4479		1249	8.3
		1307.3	23.2	1250	9	1402	6		concordant	89.1583		1250	9
		1254.1	196.1	1253.7	18.7	1255	84		concordant	99.8964		1253.7	18.7
		1260.7	77.9	1256.8	19.7	1267	28		concordant	99.1949		1256.8	19.7
		1278.9	38.6	1260.7	8.9	1310	14		concordant	96.2366		1260.7	8.9
		1273.6	119.4	1265	8.5	1288	48		concordant	98.2143		1265	8.5
		1294.5	24.2	1268.8	5.6	1337	8		concordant	94.899		1268.8	5.6
		1290.3	110.5	1280.6	13.9	1307	42		concordant	97.9801		1280.6	13.9
		1164.9	18.2	1090	5	1307	7		discordant	83.3971		1307	7
		1325.2	48.1	1314	11.8	1343	16		concordant	97.8407		1314	11.8
		1318.2	36.8	1324.6	7.3	1308	13		concordant	101.269		1324.6	7.3
		1330.5	30.3	1329.2	8.3	1333	9		concordant	99.7149		1329.2	8.3
		1388.4	80.8	1339.8	15.3	1464	25		concordant	91.5164		1339.8	15.3
		1365.7	210.7	1354.8	14.3	1383	78		concordant	97.961		1354.8	14.3
		1397.5	28.7	1363.3	7.3	1450	8		concordant	94.0207		1363.3	7.3
		1520.6	64.8	1386.2	10.2	1713	16		concordant	80.9224		1386.2	10.2
		1488.1	139.2	1388.5	58.5	1633	21		concordant	85.0276		1388.5	58.5
		1528.9	76.1	1388.8	28.6	1729	11		concordant	80.3239		1388.8	28.6
		1420.2	76.3	1394.4	8.4	1459	24		concordant	95.5723		1394.4	8.4
		1531.2	47.2	1397.3	12.6	1721	10		concordant	81.1912		1397.3	12.6
		1404.2	81.4	1401.7	11.6	1408	26		concordant	99.5526		1401.7	11.6
		1423.3	47.1	1406.7	9.1	1448	14		concordant	97.1478		1406.7	9.1
		1422.8	60.2	1412.6	10.4	1438	18		concordant	98.2337		1412.6	10.4
		1429.2	109.7	1423	13.2	1439	34		concordant	98.8881		1423	13.2
		1425.7	46.7	1433.2	11.7	1414	13		concordant	101.358		1433.2	11.7
		1452.1	52.5	1469	16.5	1428	13		concordant	102.871		1469	16.5
		1574.4	74.1	1476.6	13.1	1708	17		concordant	86.452		1476.6	13.1
		1562.7	160.7	1477.1	40.5	1680	37		concordant	87.9226		1477.1	40.5
		1555.5	68	1493.8	8.7	1640	17		concordant	91.0854		1493.8	8.7
		1627.9	49.2	1559.2	11.1	1718	10		discordant	90.7567		1718	10
		1730.2	91.3	1736.5	12.1	1722	18		concordant	100.842		1722	18
		1668.2	130.1	1616.5	16.1	1734	29		concordant	93.2238		1734	29
		1719.2	90.1	1706.2	32.3	1735	12		concordant	98.3401		1735	12
		1725.2	134.5	1697.2	23.8	1759	27		concordant	96.4866		1759	27
		1675.9	81.5	1609.5	23.4	1760	14		discordant	91.4489		1760	14
		1762.8	72.2	1764	18.2	1761	12		concordant	100.17		1761	12
		1772.1	42.5	1777.6	11	1766	7		concordant	100.657		1766	7
		1669.9	172.5	1588	44.3	1775	34		concordant	89.4648		1775	34
		1728.9	42.5	1674.9	12.8	1795	6		discordant	93.3092		1795	6
		1789.7	91	1784.4	27.3	1796	13		concordant	99.3541		1796	13
		1754	94.5	1715	20.4	1801	17		concordant	95.2249		1801	17
		1802.9	105.1	1765.2	32.2	1847	14		concordant	95.5712		1847	14
		1957.6	65	1963.8	18.1	1951	7		concordant	100.656		1951	7
Reference: Timmons, J.M., Karlstrom, K.E., Heizler, M.T., Bowring, S.A., Gehrels, G.E., Crossey, L. J., 2005. Tectonic inferences from the ca. 1255–1100 Ma Unkar Group and Nankoweap Formation, Grand Canyon: intracratonic deformation and basin formation during protracted Grenville orogenesis. Geol. Soc. Am. Bull. 117, 1573–1595. petrology of the Mesoproterozoic Unkar Group, Grand Canyon, U.S.A.: P…
					Apparent ages (Ma)
Analysis		207Pb*	±1σ	206Pb*	±1σ	206Pb*	±1σ		Overlaps 1:1 concordance at 2s?	6/8 vs 7/6 conc. (%)		Preffered age (1500Ma switch)	±1σ
		235U	(Ma)	238U*	(Ma)	207Pb*	(Ma)					(Ma)	(Ma)
T02-75-1Z Escalante Creek Member
		1150.6	114.5	1151.4	15	1149	55		concordant	100.209		1151.4	15
		1172.7	45.9	1162.1	10.8	1192	19		concordant	97.4916		1162.1	10.8
		1165.8	87.1	1164	15.4	1169	39		concordant	99.5723		1164	15.4
		1172.2	57.7	1176.3	8.1	1165	26		concordant	100.97		1176.3	8.1
		1197.3	30.4	1184.6	12.4	1220	9		concordant	97.0984		1184.6	12.4
		1195	67.4	1187.3	24.5	1209	24		concordant	98.2051		1187.3	24.5
		1227.4	75	1225.4	13.8	1231	30		concordant	99.5451		1225.4	13.8
		1260.5	51.6	1242.5	9.5	1291	19		concordant	96.2432		1242.5	9.5
		1236.7	163.8	1243.7	16.5	1225	71		concordant	101.527		1243.7	16.5
		1260.6	55.3	1243.9	11.4	1289	21		concordant	96.5012		1243.9	11.4
		1248	115.2	1246.3	10.7	1251	48		concordant	99.6243		1246.3	10.7
		1256.9	58.8	1246.5	6.3	1275	23		concordant	97.7647		1246.5	6.3
		1255.5	68.6	1247.1	14.2	1270	26		concordant	98.1969		1247.1	14.2
		1308.5	42.9	1247.8	10.6	1410	14		concordant	88.4965		1247.8	10.6
		1254.4	59.1	1248.3	30.9	1265	10		concordant	98.6798		1248.3	30.9
		1258.4	57.3	1249.3	7.4	1274	22		concordant	98.0612		1249.3	7.4
		1263.8	42.9	1250	8.6	1287	16		concordant	97.1251		1250	8.6
		1242.3	59.1	1251.8	5.3	1226	24		concordant	102.104		1251.8	5.3
		1262.9	76	1254	7.8	1278	30		concordant	98.1221		1254	7.8
		1268.7	36.7	1256.3	9.4	1290	13		concordant	97.3876		1256.3	9.4
		1274.1	112.8	1258.1	11.4	1301	45		concordant	96.7025		1258.1	11.4
		1250.6	75	1258.3	13.9	1237	29		concordant	101.722		1258.3	13.9
		1330.3	54.7	1261.9	8.9	1442	19		concordant	87.5104		1261.9	8.9
		1250.2	79.9	1263.7	28.3	1227	26		concordant	102.991		1263.7	28.3
		1252.2	69	1266.2	8.6	1228	28		concordant	103.111		1266.2	8.6
		1277.6	47.4	1270.3	5.9	1290	18		concordant	98.4729		1270.3	5.9
		1320.8	46.6	1271.9	10.9	1401	15		concordant	90.7852		1271.9	10.9
		1261.1	79.4	1273.4	14.1	1240	31		concordant	102.694		1273.4	14.1
		1284.4	29.1	1275.7	5.7	1299	10		concordant	98.2063		1275.7	5.7
		1286.7	53.5	1279.4	18.5	1299	16		concordant	98.4911		1279.4	18.5
		1273.9	104.9	1280.5	8.1	1263	42		concordant	101.386		1280.5	8.1
		1339.6	107.7	1282.9	26	1431	35		concordant	89.6506		1282.9	26
		1265	83.7	1285	11.2	1231	33		concordant	104.387		1285	11.2
		1359	91.9	1311.5	43.5	1435	15		concordant	91.3937		1311.5	43.5
		1448.1	109.4	1321.3	50.8	1639	8		concordant	80.6162		1321.3	50.8
		1363.2	92.1	1335.3	12	1407	31		concordant	94.9041		1335.3	12
		1376.6	60.2	1339.4	14.4	1435	18		concordant	93.338		1339.4	14.4
		1380.1	98.9	1354.1	20.2	1421	31		concordant	95.292		1354.1	20.2
		1479.1	53.8	1363.6	11.4	1649	14		concordant	82.6925		1363.6	11.4
		1392.4	82.5	1364.5	15	1435	26		concordant	95.0871		1364.5	15
		1492.1	53.4	1367.9	11.7	1673	13		concordant	81.7633		1367.9	11.7
		1503.9	181.3	1371.7	28.7	1695	50		concordant	80.9263		1371.7	28.7
		1415.9	45.3	1389.8	6.8	1455	14		concordant	95.5189		1389.8	6.8
		1397	176.9	1390	16	1408	61		concordant	98.7216		1390	16
		1431.5	90.3	1412.1	13.3	1460	27		concordant	96.7192		1412.1	13.3
		1511.6	52.5	1419.1	13.5	1644	12		concordant	86.32		1419.1	13.5
		1440	52.5	1437	11.9	1444	15		concordant	99.5152		1437	11.9
		1440.4	101.8	1438.8	37.3	1443	23		concordant	99.7089		1438.8	37.3
		1554.9	97.2	1439.4	13.4	1715	24		concordant	83.93		1439.4	13.4
		1555	51.7	1440.7	9.9	1714	12		concordant	84.0548		1440.7	9.9
		1440.1	110.7	1441.2	17.3	1439	34		concordant	100.153		1441.2	17.3
		1550.3	92.6	1450.9	16.7	1689	23		concordant	85.9029		1450.9	16.7
		1536.8	59.4	1461	23.6	1643	8		concordant	88.9227		1461	23.6
		1595.7	71.3	1483.6	18.2	1747	14		concordant	84.9227		1483.6	18.2
		1696.1	49.8	1683.4	16.2	1712	7		concordant	98.3294		1712	7
		1694.7	154.9	1670.9	48.3	1724	26		concordant	96.92		1724	26
		1755.2	45	1752.8	12.7	1758	7		concordant	99.7042		1758	7
		1746.4	91.7	1728.4	18.2	1768	17		concordant	97.7602		1768	17
		1779	69.7	1777	17.6	1781	11		concordant	99.7754		1781	11
		1844.3	81.7	1816.5	30	1876	7		concordant	96.8284		1876	7
		1881.4	123.4	1839.7	20.9	1928	20		concordant	95.4201		1928	20
		1873.2	154.6	1820.4	62	1932	8		concordant	94.2236		1932	8
		1913.2	55.9	1879.9	15.3	1950	7		concordant	96.4051		1950	7
		1938	44.9	1913.1	13.8	1965	4		concordant	97.3588		1965	4
		1615.7	90.3	1503.6	23.2	1765	18		discordant	85.1898
		1634.5	277.2	1536.6	22.9	1763	71		discordant	87.1583
		1603.7	49.5	1542.7	16.2	1685	8		discordant	91.5549
		1597.4	64.6	1546.3	15.9	1665	13		discordant	92.8709
		1631	71	1571.1	24.9	1709	11		discordant	91.931
		1762.4	90.6	1591.8	33.8	1971	6		discordant	80.761
		1669.1	48.9	1625.2	15.9	1725	7		discordant	94.2145
		1690.7	58	1633.5	19.3	1762	8		discordant	92.7072
		1794.6	80.9	1635.2	21.3	1985	11		discordant	82.3778
		1766.4	222.3	1656.2	43.5	1899	42		discordant	87.2143
		1762.3	50.5	1665.3	10	1879	9		discordant	88.6269
		1792.8	138	1666.4	19.3	1943	25		discordant	85.7643
		1746.9	79.6	1669.6	19.3	1841	13		discordant	90.6898
		1780.2	240.4	1691.8	27.1	1885	49		discordant	89.7507
		1817.1	128.4	1724.8	40.8	1925	16		discordant	89.6
		1817.6	85.7	1748.3	12	1898	15		discordant	92.1128
		1820.6	36.5	1760	10.6	1891	5		discordant	93.0724
		1907.7	118.7	1787.3	14.4	2041	19		discordant	87.5698
		1844.4	84.5	1791.9	19.3	1904	13		discordant	94.1124
		1857.7	59.4	1796.6	9.8	1927	9		discordant	93.233
		1861.8	86.6	1799.8	13.8	1932	14		discordant	93.1573
		1858.5	64.5	1817.3	13	1905	10		discordant	95.3963
		1944.4	60.7	1819.8	13.2	2080	8		discordant	87.4904
		1880.2	65.9	1828.2	20.7	1938	7		discordant	94.3344
		2476	141.6	2267.2	38.3	2652	2		discordant	85.4902
		2457.8	152.3	2269.4	39.8	2618	5		discordant	86.6845
		2618.8	122	2492.4	26	2718	5		discordant	91.6998
		2659.2	139.7	2537.7	27.6	2753	6		discordant	92.1794
		1439.4	75	1301	12.8	1650	21		discordant	78.8485
Unkar Group, Shinumo Sandstone (Grand Canyon)
Reference: Mulder, J. A., Karlstrom, K. E. Fletcher, K., Heizler, M. T., Timmons, J. M., Crossey, L. J., Gehrels, G. E., and Pecha, M., 2017, The syn-orogenic sedimentary record of the Grenville Orogeny in southwest Laurentia. Precambrian Research, v. 294, 33–52, doi:10.1016/j.precamres.2017.03.006
					Apparent ages (Ma)
Analysis		207Pb*	±1σ	206Pb*	±1σ	206Pb*	±1σ		Overlaps 1:1 concordance at 2s?	6/8 vs 7/6 conc. (%)		Preffered age (1500Ma switch)	±1σ
		235U	(Ma)	238U*	(Ma)	207Pb*	(Ma)					(Ma)	(Ma)
LC-16-76-5
		1154.7	103.2	1132.3	56	1197	22		concordant	94.5948		1132.3	56
		1268.3	68.9	1169.3	29.2	1440	16		concordant	81.2014		1169.3	29.2
		1181	81.8	1179.6	11	1184	37		concordant	99.6284		1179.6	11
		1246.3	89.7	1225.3	7.7	1283	37		concordant	95.5027		1225.3	7.7
		1233.8	42.9	1233.1	7	1235	17		concordant	99.8462		1233.1	7
		1258.6	97	1240.3	11	1290	39		concordant	96.1473		1240.3	11
		1265.2	73.3	1254.3	10	1284	29		concordant	97.6869		1254.3	10
		1333.8	147.9	1265.3	16.7	1446	54		concordant	87.5035		1265.3	16.7
		1263.6	169.9	1271	12	1251	72		concordant	101.599		1271	12
		1382.5	83.7	1333	12.1	1460	27		concordant	91.3014		1333	12.1
		1379.5	69.1	1335.1	26.3	1449	16		concordant	92.1394		1335.1	26.3
		1478.8	77.2	1343.3	8	1679	22		concordant	80.006		1343.3	8
		1502.6	108.5	1369.5	14.9	1696	29		concordant	80.7488		1369.5	14.9
		1410.7	68.7	1397.7	17.9	1430	19		concordant	97.7413		1397.7	17.9
		1415.8	79.3	1397.7	15.2	1443	24		concordant	96.8607		1397.7	15.2
		1525.6	73.8	1414.9	9.4	1683	19		concordant	84.0701		1414.9	9.4
		1549.2	112.8	1433.8	19	1710	28		concordant	83.848		1433.8	19
		1551.4	126.9	1439.2	15.1	1708	33		concordant	84.2623		1439.2	15.1
		1435.9	196.9	1443.5	12.7	1425	65		concordant	101.298		1443.5	12.7
		1445.4	121.4	1444.4	11.4	1447	38		concordant	99.8203		1444.4	11.4
		1570.3	99.8	1455.2	15.2	1729	24		concordant	84.1643		1455.2	15.2
		1584.5	170.9	1455.2	18.1	1761	43		concordant	82.6349		1455.2	18.1
		1582.1	177.1	1461	11.4	1748	46		concordant	83.5812		1461	11.4
		1585.4	110.1	1467.2	8.5	1746	27		concordant	84.0321		1467.2	8.5
		1577.3	42.2	1469.4	7.8	1725	10		concordant	85.1826		1469.4	7.8
		1586.3	86.8	1477.1	14.8	1735	20		concordant	85.1354		1477.1	14.8
		1455.4	124.4	1479.9	11.2	1420	38		concordant	104.218		1479.9	11.2
		1598.9	132.4	1492.2	10.5	1743	33		concordant	85.611		1492.2	10.5
		1605.7	79.4	1495.7	33	1753	7		concordant	85.3223		1495.7	33
		1703.8	65.7	1694.3	20.5	1715	10		concordant	98.793		1715	10
		1689.5	137.7	1644	44.9	1746	22		concordant	94.1581		1746	22
		1764.1	111.4	1770.2	22.3	1757	20		concordant	100.751		1757	20
		1744.3	160.6	1732.9	33.8	1758	31		concordant	98.5722		1758	31
		1760.1	51.4	1748.6	12.4	1774	8		concordant	98.5682		1774	8
		1740.3	102.4	1700.4	20.6	1789	19		concordant	95.0475		1789	19
		1733.5	170.4	1684.1	23.8	1794	35		concordant	93.874		1794	35
		1804.3	71.9	1798.1	14.8	1812	12		concordant	99.2329		1812	12
		1802.2	65	1786.4	15.8	1820	10		concordant	98.1538		1820	10
		1791.2	107.8	1755.2	12.7	1833	20		concordant	95.7556		1833	20
		1777.5	134.3	1722	24.9	1843	24		concordant	93.4346		1843	24
		1849.4	48.9	1847	15.8	1852	5		concordant	99.73		1852	5
		2640.3	109.9	2597.9	25.7	2673	4		concordant	97.1904		2673	4
		2701.2	84.3	2703.6	14.8	2699	4		concordant	100.17		2699	4
		2693.7	110.8	2683.7	27.6	2701	2		concordant	99.3595		2701	2
		2690.6	87.3	2661.5	19	2713	3		concordant	98.1017		2713	3
		2701.2	100.1	2683.9	20.8	2714	4		concordant	98.8909		2714	4
		2709.7	136.8	2687.3	28.3	2726	5		concordant	98.5803		2726	5
		2687.7	111.3	2629.2	20.2	2732	5		concordant	96.2372		2732	5
		2707.5	101.4	2666.9	22.9	2738	3		concordant	97.4032		2738	3
		2685.9	204.7	2607.3	32.2	2746	11		concordant	94.949		2746	11
		2774	146.4	2786.6	34.8	2765	3		concordant	100.781		2765	3
		2880.1	133.3	2863.2	28.5	2892	3		concordant	99.0041		2892	3
		3019.2	130.5	3010.9	22.4	3025	4		concordant	99.5339		3025	4
		1666.4	91.5	1509	36.2	1871	7		discordant	80.6521
		1637.5	136	1516.4	8.7	1797	32		discordant	84.3851
		1631.2	77.6	1520.7	28.4	1777	10		discordant	85.5768
		1693	65.8	1594.2	22.8	1818	8		discordant	87.6898
		1690.8	49.9	1654.9	13.8	1736	8		discordant	95.3283
		1766.4	93.6	1677.4	8.8	1873	18		discordant	89.5569
		1768.5	68.5	1713.3	18.8	1834	10		discordant	93.4188
		1799.1	73.2	1716.3	15.8	1896	12		discordant	90.5222
		1759.6	55.6	1719	16.6	1808	8		discordant	95.0774
		1796.8	72	1733.3	22.4	1871	9		discordant	92.6403
		2488.5	150.3	2218.5	37.3	2717	4		discordant	81.6526
		2480	241.7	2238.7	65.3	2684	6		discordant	83.4091
		2520.1	476.7	2294.3	147.4	2707	6		discordant	84.7543
		2407.3	103.2	2299	23.8	2500	6		discordant	91.96
		2519.4	206.8	2300.9	55.4	2700	4		discordant	85.2185
		2531.9	307.4	2303.7	84.3	2720	7		discordant	84.6949
		2537.3	165	2306.2	32.9	2728	9		discordant	84.5381
		2520.6	161	2312.8	42.1	2692	3		discordant	85.9138
		2628.5	281.2	2335.7	70.3	2862	5		discordant	81.6108
		2598	178.4	2344.6	43.7	2802	4		discordant	83.6759
		2563.6	171.9	2376.2	44.5	2715	3		discordant	87.5212
		2489.8	57.5	2444.4	13.3	2527	3		discordant	96.7313
		2569.6	215.2	2444.8	58.4	2670	4		discordant	91.5655
		2615.9	239	2487.8	64.8	2717	3		discordant	91.5642
		2604.9	105.2	2509.8	25.7	2680	3		discordant	93.6493
		2659.4	94.6	2533.2	18.9	2757	4		discordant	91.8825
		2627.3	119.8	2545.3	27.3	2691	4		discordant	94.5857
		2628.1	97.6	2569.5	18	2674	5		discordant	96.092
		2679.7	142.6	2605.3	29.6	2736	6		discordant	95.223
		3123.1	209.2	2990.6	41	3209	2		discordant	93.1941
T01-76-2
		1127.1	45.5	1089.6	10.7	1200	20		concordant	90.8		1089.6	10.7
		1267.9	45	1236.7	5	1321	17		concordant	93.6185		1236.7	5
		1505.6	42.1	1396.9	11.8	1662	9		concordant	84.0493		1396.9	11.8
		1522	38.8	1414.1	10.4	1675	8		concordant	84.4239		1414.1	10.4
		1532.7	77.8	1436.5	10.1	1668	20		concordant	86.1211		1436.5	10.1
		1548.7	69.5	1438.8	14.8	1702	16		concordant	84.5358		1438.8	14.8
		1540.1	48.8	1440.1	15.1	1680	9		concordant	85.7202		1440.1	15.1
		1549.4	155.8	1455.4	24.4	1680	40		concordant	86.631		1455.4	24.4
		1600.5	64	1459.9	12.4	1791	14		concordant	81.5131		1459.9	12.4
		1602.4	71.3	1486.7	14.5	1758	15		concordant	84.5677		1486.7	14.5
		1609.4	66.7	1498.3	5.7	1758	16		concordant	85.2275		1498.3	5.7
		1665	109.9	1661.7	18.4	1669	24		concordant	99.5626		1669	24
		1721.6	75.3	1690.2	18.9	1760	13		concordant	96.0341		1760	13
		1758.2	110.7	1728	14.5	1794	22		concordant	96.3211		1794	22
		1807.7	42.8	1795.2	11	1822	6		concordant	98.5291		1822	6
		1835.2	84	1822.3	13.7	1850	14		concordant	98.5027		1850	14
		1836.5	107.5	1786.4	41.2	1894	8		concordant	94.3189		1894	8
		1894	66.6	1890.2	14.7	1898	9		concordant	99.589		1898	9
		1947.1	110.4	1951.6	10.2	1942	17		concordant	100.494		1942	17
		1944.2	99.5	1938.4	34.7	1950	8		concordant	99.4051		1950	8
		1934.6	74	1906.8	28.1	1965	3		concordant	97.0382		1965	3
		1959.9	107.6	1949.9	37.7	1970	8		concordant	98.9797		1970	8
		1995.1	59.8	1981.5	10.4	2009	8		concordant	98.6312		2009	8
		2213.1	99.6	2212.8	31.1	2213	5		concordant	99.991		2213	5
		2527.2	139.1	2489.8	14	2557	10		concordant	97.3719		2557	10
		2639.7	80.2	2633.8	20.1	2644	2		concordant	99.6142		2644	2
		2875.2	143.7	2842.7	33.1	2898	2		concordant	98.0918		2898	2
		1561.1	38.6	1417.3	9	1762	8		discordant	80.437
		1636.5	77	1509.2	12.9	1804	16		discordant	83.6585
		1627	63.1	1525.5	11	1761	14		discordant	86.6269
		1657.5	67.4	1532.6	16.2	1820	13		discordant	84.2088
		1674.5	183.7	1546	25.1	1840	41		discordant	84.0217
		1623.3	154.5	1547	16.4	1724	37		discordant	89.7332
		1631.2	85.4	1553.7	34.3	1733	9		discordant	89.6538
		1671.3	59.6	1570.4	13.7	1801	11		discordant	87.196
		1652.1	61.6	1571.5	13.7	1756	12		discordant	89.4932
		1670.5	92.5	1574.9	39.1	1793	6		discordant	87.836
		1730.5	64.2	1598.2	16.7	1895	10		discordant	84.3377
		1712.2	54.2	1611.4	17.4	1838	7		discordant	87.6714
		1718.8	57.4	1629.9	7.6	1829	11		discordant	89.1143
		1768.8	77.1	1630.1	11.5	1937	14		discordant	84.1559
		1695.5	61.9	1631.3	17.8	1776	10		discordant	91.8525
		1703.6	94.1	1633	17.1	1791	19		discordant	91.1781
		1795.3	65.8	1633.2	21.5	1989	7		discordant	82.1116
		1783.5	201.3	1642.9	84.4	1952	5		discordant	84.165
		1784.6	128.8	1656.2	50.6	1938	7		discordant	85.4592
		1768.3	54.7	1658.5	15.9	1901	7		discordant	87.2436
		1802.1	55.9	1665.1	19.4	1964	5		discordant	84.7811
		1782.3	53.7	1676.8	17.6	1908	6		discordant	87.8826
		1791.5	66.9	1683.4	14	1920	11		discordant	87.6771
		1799.7	59.9	1690.8	19.5	1928	6		discordant	87.6971
		1794.4	47.6	1692.4	12.4	1915	7		discordant	88.376
		1772.3	77.7	1702	9.1	1856	15		discordant	91.7026
		1810.8	137.5	1715.9	45.6	1922	16		discordant	89.2768
		1766.6	59.1	1720.5	17.1	1822	8		discordant	94.4292
		1891	76.3	1721.2	21.5	2083	8		discordant	82.6308
		1832.2	61.6	1743.9	22.2	1934	5		discordant	90.1706
		1817.1	44.9	1757.7	12.1	1886	6		discordant	93.1972
		1830.2	56.8	1762.2	14	1908	8		discordant	92.3585
		1852.3	52.1	1781.6	12.3	1933	7		discordant	92.1676
		1874.3	32.4	1789.1	7.6	1970	4		discordant	90.8173
		1843.6	62.9	1799.4	12	1894	10		discordant	95.0053
		1881.3	72.6	1826.2	13.7	1943	11		discordant	93.9887
		1896.9	112.3	1841.1	11.9	1959	18		discordant	93.9816
		1966.8	57.5	1858	13.6	2083	7		discordant	89.1983
		1957.5	48.9	1899.9	15.4	2019	4		discordant	94.101
		2383	50	2185.9	13	2556	2		discordant	85.5203
		2407.6	220.9	2250.7	66.5	2543	3		discordant	88.5057
		2457.2	104.4	2311.8	22.8	2580	6		discordant	89.6047
		2482.6	106.9	2362.3	28.5	2583	3		discordant	91.4557
		2515	95	2391	23.7	2617	3		discordant	91.3642
		2670	338.3	2393.4	88.1	2887	2		discordant	82.9027
		2675.7	110.9	2428.5	24.4	2868	3		discordant	84.6757
		2489.8	104.3	2429.2	18.3	2540	7		discordant	95.6378
		2659	88.7	2488.3	14.9	2792	4		discordant	89.1225
		2564.7	85	2500.2	14.6	2616	5		discordant	95.5734
		2847.2	239.2	2502.4	41.4	3101	8		discordant	80.6965
		2670.5	136	2540.4	23.9	2770	7		discordant	91.7112
		2765.8	110.7	2618.7	25.1	2875	2		discordant	91.0852
		2809.7	128.6	2670.7	28.1	2911	3		discordant	91.7451
K1275L-1
		1129.24	24.6528	1078.98	13.0283	1227.19	66.2092		concordant	87.9226		1078.98	13.0283
		1146.12	11.6539	1084.07	12.6973	1265.5	21.9019		concordant	85.6632		1084.07	12.6973
		1165.78	61.2208	1110.89	86.1548	1269.22	49.8442		concordant	87.5257		1110.89	86.1548
		1190.97	13.5856	1181.72	13.3789	1207.81	29.33		concordant	97.8404		1181.72	13.3789
		1190.29	13.5967	1182.74	13.0206	1204.01	29.9472		concordant	98.2337		1182.74	13.0206
		1200.79	14.7599	1185.81	16.7089	1227.83	27.8771		concordant	96.5784		1185.81	16.7089
		1238.06	66.2683	1197.62	35.1712	1309.12	168.609		concordant	91.4831		1197.62	35.1712
		1193.14	14.4562	1198.02	14.1183	1184.32	31.7237		concordant	101.156		1198.02	14.1183
		1226.47	28.9053	1198.94	22.3618	1275.2	68.3901		concordant	94.0196		1198.94	22.3618
		1194.7	23.8034	1199.3	27.3773	1186.41	45.1551		concordant	101.087		1199.3	27.3773
		1196.78	18.0811	1199.96	18.6511	1191.05	38.0377		concordant	100.748		1199.96	18.6511
		1193.12	13.0322	1201.29	11.859	1178.37	29.8593		concordant	101.945		1201.29	11.859
		1214.31	11.4706	1201.74	13.5217	1236.72	20.5794		concordant	97.172		1201.74	13.5217
		1208.51	25.8063	1202.66	13.3863	1219.01	67.6844		concordant	98.6583		1202.66	13.3863
		1184.58	20.3486	1203.37	13.4344	1150.43	52.4146		concordant	104.602		1203.37	13.4344
		1209.44	11.1138	1203.54	10.3931	1219.97	24.6677		concordant	98.6532		1203.54	10.3931
		1199.82	22.2495	1203.57	11.8773	1193.09	58.6109		concordant	100.878		1203.57	11.8773
		1198.79	17.0103	1206.34	9.9816	1185.23	44.2925		concordant	101.781		1206.34	9.9816
		1231.28	29.5403	1211.53	17.82	1266	74.4706		concordant	95.6971		1211.53	17.82
		1201.88	10.1542	1211.61	9.25887	1184.46	23.1835		concordant	102.292		1211.61	9.25887
		1213.52	18.2239	1212.88	27.8701	1214.66	10.1937		concordant	99.8535		1212.88	27.8701
		1205.97	9.72198	1213	13.6707	1193.39	11.9643		concordant	101.643		1213	13.6707
		1220.19	12.3081	1214.85	11.8311	1229.66	26.8089		concordant	98.7954		1214.85	11.8311
		1205.75	17.8179	1217.04	10.0537	1185.59	46.5574		concordant	102.653		1217.04	10.0537
		1235.47	29.1675	1217.36	12.3137	1267.21	76.6911		concordant	96.0664		1217.36	12.3137
		1225.76	10.0289	1217.38	7.50944	1240.53	24.1999		concordant	98.1343		1217.38	7.50944
		1216.25	11.4102	1217.42	9.99033	1214.17	26.2341		concordant	100.267		1217.42	9.99033
		1246.09	29.2629	1220.27	22.6063	1291	68.7546		concordant	94.5212		1220.27	22.6063
		1226.15	21.1772	1225.31	17.5627	1227.62	49.5472		concordant	99.8121		1225.31	17.5627
		1214.2	20.7171	1227.29	20.6748	1191.01	44.7323		concordant	103.045		1227.29	20.6748
		1231.32	14.1381	1227.33	9.79894	1238.33	34.8575		concordant	99.111		1227.33	9.79894
		1274.21	57.8529	1228.41	36.7558	1352.32	140.055		concordant	90.8372		1228.41	36.7558
		1230.14	13.1253	1229.91	11.97	1230.57	29.4066		concordant	99.9464		1229.91	11.97
		1237.16	20.5118	1234.52	12.6747	1241.78	51.6731		concordant	99.4153		1234.52	12.6747
		1226.93	14.4271	1234.64	18.8957	1213.43	22.2458		concordant	101.748		1234.64	18.8957
		1224.19	14.2883	1234.84	17.1585	1205.47	25.7113		concordant	102.437		1234.84	17.1585
		1219.95	20.7266	1235.12	28.6975	1193.25	27.9155		concordant	103.509		1235.12	28.6975
		1228.35	13.4078	1238.18	14.6418	1211.14	26.7808		concordant	102.233		1238.18	14.6418
		1242.93	25.5154	1248.13	39.6984	1233.94	12.7973		concordant	101.15		1248.13	39.6984
		1244.21	13.8281	1250.32	8.48869	1233.66	34.8709		concordant	101.35		1250.32	8.48869
		1259.76	51.6028	1251.65	37.8847	1273.65	123.399		concordant	98.2726		1251.65	37.8847
		1258.6	6.72181	1261.47	6.40837	1253.67	14.5588		concordant	100.622		1261.47	6.40837
		1263.43	12.9146	1263.72	15.3711	1262.94	23.0999		concordant	100.062		1263.72	15.3711
		1297.16	12.7925	1290.62	13.9403	1307.98	24.7865		concordant	98.6729		1290.62	13.9403
		1329.44	9.95976	1329.21	11.1933	1329.79	18.7329		concordant	99.9563		1329.21	11.1933
		1380.41	21.9376	1339.5	32.4627	1444.23	21.2511		concordant	92.7481		1339.5	32.4627
		1336.45	13.6885	1345.51	11.4839	1321.93	30.6257		concordant	101.784		1345.51	11.4839
		1403.41	15.8009	1347.44	22.7514	1489.46	17.0974		concordant	90.4652		1347.44	22.7514
		1426.73	15.021	1385.25	12.3977	1489.15	31.9832		concordant	93.0226		1385.25	12.3977
		1434.29	37.6717	1387.35	29.5105	1504.61	81.1816		concordant	92.2067		1387.35	29.5105
		1508.57	33.2243	1420.83	38.9243	1634.01	54.3559		concordant	86.9538		1420.83	38.9243
		1445.75	7.91407	1430.98	9.3624	1467.52	13.7155		concordant	97.5103		1430.98	9.3624
		1442.33	9.788	1441.68	10.1654	1443.25	19.0174		concordant	99.8912		1441.68	10.1654
		1450.08	14.5402	1442.3	18.1785	1461.49	23.8063		concordant	98.6867		1442.3	18.1785
		1446.74	8.63096	1448.09	12.1943	1444.75	11.566		concordant	100.231		1448.09	12.1943
		1452.78	23.6731	1448.95	25.4928	1458.38	44.7033		concordant	99.3532		1448.95	25.4928
		1459.82	20.4552	1453.45	28.8835	1469.09	27.1914		concordant	98.9351		1453.45	28.8835
		1462.83	49.3498	1453.53	23.7068	1476.34	115.742		concordant	98.4552		1453.53	23.7068
		1460.31	13.3574	1453.57	16.1016	1470.11	22.8135		concordant	98.8746		1453.57	16.1016
		1457.78	17.7481	1456.82	11.9406	1459.15	39.9803		concordant	99.8401		1456.82	11.9406
		1449.18	8.7666	1458.73	12.5063	1435.19	11.643		concordant	101.64		1458.73	12.5063
		1457.54	11.7271	1460.79	9.18912	1452.8	25.5499		concordant	100.55		1460.79	9.18912
		1467.87	17.4488	1462.03	14.5814	1476.32	37.0287		concordant	99.0325		1462.03	14.5814
		1450.94	27.9103	1462.35	9.28672	1434.24	67.6121		concordant	101.96		1462.35	9.28672
		1475.7	16.2187	1463.28	11.5026	1493.58	35.7726		concordant	97.9713		1463.28	11.5026
		1460.56	11.316	1463.93	10.5544	1455.64	23.1826		concordant	100.569		1463.93	10.5544
		1461.94	23.7613	1465.87	19.8788	1456.21	50.7007		concordant	100.663		1465.87	19.8788
		1455.16	12.1368	1467.07	11.5208	1437.78	24.8099		concordant	102.037		1467.07	11.5208
		1464.8	15.6482	1467.62	19.8176	1460.7	25.4455		concordant	100.474		1467.62	19.8176
		1465.81	9.40121	1469.01	9.57041	1461.17	18.4091		concordant	100.536		1469.01	9.57041
		1465.26	16.9595	1474.99	27.2664	1451.17	13.5119		concordant	101.642		1474.99	27.2664
		1478.09	10.4577	1475.09	12.436	1482.39	18.1242		concordant	99.5075		1475.09	12.436
		1478.66	8.05449	1475.85	9.51617	1482.66	14.0478		concordant	99.5407		1475.85	9.51617
		1484.58	14.4127	1482.22	18.0561	1487.93	23.6083		concordant	99.6158		1482.22	18.0561
		1479.27	14.6106	1488.07	14.3567	1466.64	29.1253		concordant	101.461		1488.07	14.3567
		1481.48	15.5627	1490.37	18.6311	1468.74	27.0302		concordant	101.473		1490.37	18.6311
		1492.23	15.5245	1490.71	11.1013	1494.37	34.0946		concordant	99.7547		1490.71	11.1013
		1498.22	11.001	1500.68	13.1565	1494.71	18.9884		concordant	100.399		1494.71	18.9884
		1488.29	16.5354	1495.17	25.2597	1478.49	17.9852		concordant	101.128		1495.17	25.2597
		1495.28	11.7011	1497.56	15.3096	1492.02	18.1868		concordant	100.371		1497.56	15.3096
		1502.08	20.8699	1501.35	19.2073	1503.08	42.375		concordant	99.8848		1503.08	42.375
		1541.1	17.5398	1565.66	18.5481	1507.56	33.3282		concordant	103.853		1507.56	33.3282
		1599.27	8.08706	1605.77	9.68217	1590.7	13.7889		concordant	100.947		1590.7	13.7889
		1615.61	9.93977	1624.62	11.8037	1603.87	17.0475		concordant	101.294		1603.87	17.0475
		1614.02	7.01454	1614.63	9.8997	1613.21	9.72819		concordant	100.088		1613.21	9.72819
		1680.04	20.9292	1689.84	33.8059	1667.82	21.2567		concordant	101.32		1667.82	21.2567
		1691.13	14.3841	1685.6	11.3529	1697.99	28.9358		concordant	99.2705		1697.99	28.9358
		1756.57	18.7787	1757.38	16.4772	1755.59	36.1519		concordant	100.102		1755.59	36.1519
		1813.53	10.3708	1820.65	14.7215	1805.34	14.5915		concordant	100.848		1805.34	14.5915
		1786.85	7.61561	1769.53	9.08439	1807.13	12.5407		concordant	97.919		1807.13	12.5407
		1868.93	22.7747	1888.9	37.6246	1846.79	24.443		concordant	102.281		1846.79	24.443
		1891.91	19.6446	1918.83	34.048	1862.48	18.3607		concordant	103.026		1862.48	18.3607
		1855.19	13.8042	1828.17	25.1651	1885.6	6.37286		concordant	96.9542		1885.6	6.37286
		1884.29	8.95649	1879.43	11.7454	1889.64	13.6345		concordant	99.4599		1889.64	13.6345
		1883.2	10.4377	1876.89	17.476	1890.15	10.3878		concordant	99.2985		1890.15	10.3878
		2551.01	12.4432	2536.86	27.1477	2562.27	5.36118		concordant	99.0082		2562.27	5.36118
		1808.03	23.8454	1731.95	41.9698	1896.88	10.4602		discordant	91.3051
Reference: Bloch, J., Timmons, M., Crossey, L.J., Gehrels, G.E., Karlstrom, K.E., 2006. Mudstone petrology of the Mesoproterozoic Unkar Group, Grand Canyon, U.S.A.: Provenance, weathering, and sediment transport on intracratonic Rodinia. J. Sediment. Res. 76, 1106–1119.
					Apparent ages (Ma)
Analysis		207Pb*	±1σ	206Pb*	±1σ	206Pb*	±1σ		Overlaps 1:1 concordance at 2s?	6/8 vs 7/6 conc. (%)		Preffered age (1500Ma switch)	±1σ
		235U	(Ma)	238U*	(Ma)	207Pb*	(Ma)					(Ma)	(Ma)
T01-76-3 Shinumo Sandstone
		1184.5	297.1	1190.4	21.8	1174	151		concordant	101.397		1190.4	21.8
		1293.4	84.1	1192.8	35.7	1464	18		concordant	81.4754		1192.8	35.7
		1235.7	53.3	1234.6	25.4	1237	13		concordant	99.806		1234.6	25.4
		1241.8	148.8	1249.2	14.5	1229	64		concordant	101.644		1249.2	14.5
		1319.8	67.4	1250.1	12.1	1435	23		concordant	87.115		1250.1	12.1
		1253	323.3	1256.9	22.4	1246	150		concordant	100.875		1256.9	22.4
		1261.1	50.3	1261.6	20.6	1260	14		concordant	100.127		1261.6	20.6
		1289	282.2	1273.5	25.2	1315	120		concordant	96.8441		1273.5	25.2
		1249.4	130.7	1276.9	12	1202	55		concordant	106.231		1276.9	12
		1322.8	51.9	1283.9	16.3	1386	15		concordant	92.6335		1283.9	16.3
		1352	123.1	1303.2	59.8	1430	19		concordant	91.1329		1303.2	59.8
		1393.2	113.8	1339.4	12.2	1477	37		concordant	90.6838		1339.4	12.2
		1391.7	51.1	1357.6	9.1	1444	16		concordant	94.0166		1357.6	9.1
		1497.4	48.5	1375.6	17.2	1674	9		concordant	82.1744		1375.6	17.2
		1413.8	67.9	1404.7	9.7	1428	21		concordant	98.3683		1404.7	9.7
		1498.8	290.2	1406.3	16.3	1632	91		concordant	86.1703		1406.3	16.3
		1430.5	147.1	1416.5	17.4	1451	47		concordant	97.6223		1416.5	17.4
		1517.3	61.3	1425.6	22.9	1648	10		concordant	86.5049		1425.6	22.9
		1422.5	99.6	1428.4	9.4	1414	32		concordant	101.018		1428.4	9.4
		1559.5	94	1429	41	1741	6		concordant	82.0793		1429	41
		1426.1	46.6	1439.4	16.9	1406	11		concordant	102.376		1439.4	16.9
		1448.3	52.9	1444.4	13.4	1454	14		concordant	99.3398		1444.4	13.4
		1447.5	50.4	1447.4	15.9	1448	12		concordant	99.9586		1447.4	15.9
		1449.3	25.1	1448.9	9.4	1450	5		concordant	99.9241		1448.9	9.4
		1454.7	47.2	1453.2	14.3	1457	11		concordant	99.7392		1453.2	14.3
		1452.5	172.7	1458.4	50.4	1444	47		concordant	100.997		1458.4	50.4
		1617.7	66.9	1459.7	20.6	1830	11		concordant	79.765		1459.7	20.6
		1556.3	70.3	1462.6	8.7	1686	18		concordant	86.7497		1462.6	8.7
		1547.4	116.6	1471.2	48.7	1653	15		concordant	89.0018		1471.2	48.7
		1556.6	125.7	1476.3	24.3	1667	31		concordant	88.5603		1476.3	24.3
		1597.4	109.9	1497.3	17.5	1732	26		concordant	86.4492		1497.3	17.5
		1502.1	61.7	1500.7	13.8	1504	16		concordant	99.7806		1504	16
		1583	85.9	1551.4	26.3	1625	17		concordant	95.4708		1625	17
		1682	77.9	1684.1	13.3	1679	16		concordant	100.304		1679	16
		1708.1	42	1707.4	11.9	1709	7		concordant	99.9064		1709	7
		1719.1	41.4	1727.2	11.3	1709	7		concordant	101.065		1709	7
		1681.9	70.2	1659	26.8	1711	8		concordant	96.9608		1711	8
		1698.1	85	1677.6	13.2	1724	17		concordant	97.3086		1724	17
		1697.7	55.5	1665.8	12.7	1737	10		concordant	95.901		1737	10
		1768.9	64.7	1782.7	14.2	1753	11		concordant	101.694		1753	11
		1697.7	190.8	1648.2	75.2	1759	24		concordant	93.701		1759	24
		1726.7	63.8	1691.3	17.6	1770	10		concordant	95.5537		1770	10
		1703.2	131.1	1644.8	57.1	1776	7		concordant	92.6126		1776	7
		1777.3	105.8	1777.7	24.7	1777	18		concordant	100.039		1777	18
		1759.7	66.2	1740.4	24.9	1783	7		concordant	97.6108		1783	7
		1774.3	55.8	1740.1	13.8	1815	9		concordant	95.8733		1815	9
		1796.3	55	1775.1	18.6	1821	6		concordant	97.4794		1821	6
		1856.8	65.2	1843.8	7.7	1871	11		concordant	98.5462		1871	11
		1882	79.6	1877.3	12.2	1887	13		concordant	99.486		1887	13
		1867.3	112.7	1845.6	18.1	1891	18		concordant	97.5992		1891	18
		2518.5	103.3	2519.1	20.6	2518	6		concordant	100.044		2518	6
		2547.8	107.3	2495.5	28.9	2590	2		concordant	96.3514		2590	2
		2630.9	201.9	2621.2	51.2	2638	7		concordant	99.3632		2638	7
		2640.1	142.7	2599.9	34.5	2671	5		concordant	97.3381		2671	5
		2685.5	66.5	2689.1	13.7	2683	3		concordant	100.227		2683	3
		2670.8	90.1	2645.9	14.7	2690	5		concordant	98.3606		2690	5
		2749.8	181.8	2750.7	26	2749	10		concordant	100.062		2749	10
		1678.1	66.4	1552.5	22.8	1839	8		discordant	84.4209
		1657.4	75.2	1608.4	21.2	1720	13		discordant	93.5116
		1729	102.8	1618.5	31.6	1865	15		discordant	86.7828
		1713.3	57.2	1642.5	15.7	1801	9		discordant	91.1993
		1734.4	69.1	1662.3	24.8	1822	8		discordant	91.2349
		1725.1	77.5	1663	20.5	1801	13		discordant	92.3376
		1704.6	49.9	1664	13.8	1755	8		discordant	94.8148
		1764.8	139.1	1694.4	16.3	1849	27		discordant	91.6387
		1759.7	50.8	1704.6	13.8	1826	8		discordant	93.3516
		1767.7	78.5	1725.6	13.2	1818	14		discordant	94.9175
		1869.8	129.2	1790.3	47.7	1959	10		discordant	91.3885
		2370.9	99.9	2245	24.9	2481	5		discordant	90.4877
		2538.6	188.2	2334.7	50.2	2706	3		discordant	86.2786
		2555.7	193.1	2374	49.7	2703	5		discordant	87.8283
		2584.2	161	2411.8	40.5	2722	4		discordant	88.604
		2615.3	170.7	2464.1	43.4	2735	3		discordant	90.0951
		2659.6	268.2	2500.4	52	2783	14		discordant	89.8455
		2636.5	89.6	2559.1	17.9	2696	4		discordant	94.9221
T02-75-2Z
		1093.1	60.4	1046.1	25.4	1188	22		concordant	88.0556		1046.1	25.4
		1135.5	95.7	1048.2	29.6	1306	39		concordant	80.2603		1048.2	29.6
		1137.1	96	1131.4	13.9	1148	46		concordant	98.554		1131.4	13.9
		1158.1	100.6	1137.6	30.1	1197	42		concordant	95.0376		1137.6	30.1
		1172.8	106.1	1163.6	8	1190	50		concordant	97.7815		1163.6	8
		1221.6	75.6	1170	17.1	1314	29		concordant	89.0411		1170	17.1
		1161.3	95.5	1172.8	9.1	1140	45		concordant	102.877		1172.8	9.1
		1166.2	42.1	1175.7	13.6	1149	16		concordant	102.324		1175.7	13.6
		1188.2	57.6	1184.9	16	1194	23		concordant	99.2379		1184.9	16
		1295.5	144.7	1200.8	16.6	1456	55		concordant	82.4725		1200.8	16.6
		1287.4	97.2	1203.5	50.5	1430	9		concordant	84.1608		1203.5	50.5
		1218.9	42.7	1217.5	8.1	1221	17		concordant	99.7133		1217.5	8.1
		1239	74.6	1217.6	8.8	1276	30		concordant	95.4232		1217.6	8.8
		1220.9	345.2	1220.9	58.6	1221	165		concordant	99.9918		1220.9	58.6
		1246.1	53.8	1226.7	15	1280	19		concordant	95.8359		1226.7	15
		1244.2	34.4	1230.8	15.7	1267	8		concordant	97.1429		1230.8	15.7
		1247.3	43.1	1231	14.1	1276	14		concordant	96.4734		1231	14.1
		1262.1	78.2	1234.4	21	1310	28		concordant	94.229		1234.4	21
		1228.1	175.7	1235	18.1	1216	78		concordant	101.562		1235	18.1
		1255.6	69.8	1235.2	18.8	1291	25		concordant	95.6778		1235.2	18.8
		1241.9	61.8	1236.6	7.8	1251	25		concordant	98.8489		1236.6	7.8
		1249.4	72.7	1239.2	8.7	1267	29		concordant	97.8058		1239.2	8.7
		1237	36.9	1241.5	11.5	1229	13		concordant	101.017		1241.5	11.5
		1258.1	65.7	1245.1	20	1280	22		concordant	97.2734		1245.1	20
		1293.9	41	1256.8	13.4	1356	12		concordant	92.6844		1256.8	13.4
		1266.1	84.4	1257.8	12.6	1280	33		concordant	98.2656		1257.8	12.6
		1256.6	57.8	1259.8	5.3	1251	23		concordant	100.703		1259.8	5.3
		1226.4	174.5	1266.6	15.2	1157	79		concordant	109.473		1266.6	15.2
		1265.3	51.8	1269.9	9	1257	20		concordant	101.026		1269.9	9
		1268.6	65.1	1271.1	28	1264	17		concordant	100.562		1271.1	28
		1265.8	47.5	1283.7	23.9	1236	9		concordant	103.859		1283.7	23.9
		1346.5	168.9	1291.8	46.2	1434	54		concordant	90.0837		1291.8	46.2
		1340.3	39.7	1296.3	9.3	1411	12		concordant	91.871		1296.3	9.3
		1345.1	66	1298.2	13.5	1421	21		concordant	91.3582		1298.2	13.5
		1344.9	183.8	1300.8	20.9	1416	67		concordant	91.8644		1300.8	20.9
		1354.9	52	1310.1	12.9	1426	16		concordant	91.8724		1310.1	12.9
		1364.4	74.5	1321	12.6	1433	24		concordant	92.1842		1321	12.6
		1374	139.3	1332.3	39.3	1439	42		concordant	92.5851		1332.3	39.3
		1369	127.7	1335.9	11.4	1421	44		concordant	94.0113		1335.9	11.4
		1373.7	80.1	1337.8	23.7	1430	23		concordant	93.5524		1337.8	23.7
		1385.2	57.1	1346.9	12.2	1445	17		concordant	93.2111		1346.9	12.2
		1378.3	34.6	1348.4	13.3	1425	8		concordant	94.6246		1348.4	13.3
		1381.7	50.8	1359.4	9.9	1416	16		concordant	96.0028		1359.4	9.9
		1495.6	60.5	1367.7	26.3	1682	5		concordant	81.3139		1367.7	26.3
		1398	45	1374	17.4	1435	10		concordant	95.7491		1374	17.4
		1403.5	61.1	1375	30.1	1447	6		concordant	95.0242		1375	30.1
		1415.5	60.9	1379.7	13.5	1470	17		concordant	93.8571		1379.7	13.5
		1415.8	36.5	1400.1	8.9	1439	10		concordant	97.2967		1400.1	8.9
		1425	71.3	1405.2	26.1	1455	16		concordant	96.5773		1405.2	26.1
		1413	72.6	1405.4	11.7	1424	22		concordant	98.6938		1405.4	11.7
		1430.3	38.6	1413.1	7.7	1456	11		concordant	97.0536		1413.1	7.7
		1428.8	55.3	1420.3	14.9	1441	15		concordant	98.5635		1420.3	14.9
		1569.6	106.2	1427.3	23.5	1767	24		concordant	80.7753		1427.3	23.5
		1515.9	368.5	1428	23.9	1641	117		concordant	87.0201		1428	23.9
		1435.4	77.3	1429.2	35.1	1445	12		concordant	98.9066		1429.2	35.1
		1437.2	85.1	1430.2	18.7	1448	24		concordant	98.7707		1430.2	18.7
		1550.5	57.4	1445.1	19.4	1697	10		concordant	85.1562		1445.1	19.4
		1550.5	68.1	1450.1	15	1690	16		concordant	85.8047		1450.1	15
		1538.6	61.5	1452.6	9.8	1659	15		concordant	87.5588		1452.6	9.8
		1554.3	119.7	1460.2	33	1685	26		concordant	86.6588		1460.2	33
		1554.1	66.4	1464.8	24.5	1678	10		concordant	87.2944		1464.8	24.5
		1535.8	51.3	1468.2	12.8	1630	12		concordant	90.0736		1468.2	12.8
		1564.2	36.7	1468.3	14.4	1696	5		concordant	86.5743		1468.3	14.4
		1547.1	90.4	1480.6	7.6	1639	24		concordant	90.3356		1480.6	7.6
		1598.4	287.1	1555.2	26.2	1656	78		concordant	93.913		1656	78
		1651.3	51.7	1647.9	18.6	1656	7		concordant	99.5109		1656	7
		1576	79.7	1499.9	27.8	1680	13		concordant	89.2798		1680	13
		1723	130.1	1679	18.5	1777	27		concordant	94.4851		1777	27
		1757.2	230.3	1709.6	24.4	1814	48		concordant	94.2448		1814	48
		1796.7	92.2	1765.5	12.7	1833	17		concordant	96.3175		1833	17
		1825.7	99.2	1812.1	18.3	1841	17		concordant	98.4302		1841	17
		1831	128	1819.9	18.7	1844	23		concordant	98.6931		1844	23
		1807.8	116.8	1756.9	36.5	1867	15		concordant	94.1028		1867	15
		1856.7	85.9	1827.5	19.1	1890	13		concordant	96.6931		1890	13
		1842.9	169.8	1793.7	24.5	1899	30		concordant	94.455		1899	30
		1844.7	176.9	1795.4	25.6	1901	31		concordant	94.445		1901	31
		1878.1	84.7	1851.5	32.8	1908	5		concordant	97.0388		1908	5
		1888.7	61.9	1868.9	11.7	1911	9		concordant	97.797		1911	9
		1897	68.1	1874	9.5	1922	11		concordant	97.5026		1922	11
		1877.8	78.3	1830.3	30.6	1931	3		concordant	94.7851		1931	3
		2657	158	2613.4	39.9	2690	4		concordant	97.1524		2690	4
		1610.2	82.6	1528.3	7.3	1719	20		discordant	88.9063
		1641.4	92.6	1551.3	10.7	1759	21		discordant	88.1922
		1649.3	244.9	1556.8	13.5	1769	61		discordant	88.0045
		1639.5	48.7	1586.9	8	1708	10		discordant	92.9098
		1708.3	69.9	1605	27.4	1838	6		discordant	87.3232
		1659.8	48.3	1605.9	12.6	1729	9		discordant	92.8803
		1674.6	91	1616.3	14.2	1748	19		discordant	92.4657
		1738.3	89.3	1677.9	32.6	1812	10		discordant	92.5993
		1869	75.6	1789.2	19.5	1959	10		discordant	91.3323
		1847.6	56.5	1789.8	13.5	1913	8		discordant	93.5599
		1864.9	49.8	1808.4	15.2	1929	5		discordant	93.7481
		1857.1	93.7	1808.8	6.4	1912	16		discordant	94.6025
		1867.9	52.1	1822.6	16.9	1919	5		discordant	94.9766
		2454.4	108	2319.4	28.9	2568	3		discordant	90.3193
Reference: Timmons, J.M., Karlstrom, K.E., Heizler, M.T., Bowring, S.A., Gehrels, G.E., Crossey, L. J., 2005. Tectonic inferences from the ca. 1255–1100 Ma Unkar Group and Nankoweap Formation, Grand Canyon: intracratonic deformation and basin formation during protracted Grenville orogenesis. Geol. Soc. Am. Bull. 117, 1573–1595. petrology of the Mesoproterozoic Unkar Group, Grand Canyon, U.S.A.: P…
					Apparent ages (Ma)
Analysis		207Pb*	±1σ	206Pb*	±1σ	206Pb*	±1σ		Overlaps 1:1 concordance at 2s?	6/8 vs 7/6 conc. (%)		Preffered age (1500Ma switch)	±1σ
		235U	(Ma)	238U*	(Ma)	207Pb*	(Ma)					(Ma)	(Ma)
T01-75-4
		1019.2	198.3	974.2	45.1	1117	117		concordant	87.2158		974.2	45.1
		1134.4	49.3	1116.5	7.4	1169	23		concordant	95.509		1116.5	7.4
		1142.5	53.3	1141.6	14.3	1144	23		concordant	99.7902		1141.6	14.3
		1246.9	56.2	1162.8	16.1	1395	19		concordant	83.3548		1162.8	16.1
		1153.3	38.1	1165.3	5.3	1131	18		concordant	103.033		1165.3	5.3
		1235.4	152.5	1189.1	24.5	1317	64		concordant	90.2885		1189.1	24.5
		1233.9	58.6	1190	21.1	1311	19		concordant	90.7704		1190	21.1
		1244	49	1223	19.8	1280	14		concordant	95.5469		1223	19.8
		1301.1	33.9	1224.1	6	1430	12		concordant	85.6014		1224.1	6
		1312.8	87	1239.1	17.9	1435	30		concordant	86.3484		1239.1	17.9
		1257.2	24.1	1248.2	6.2	1273	8		concordant	98.0518		1248.2	6.2
		1346	81.1	1249.6	20.2	1503	25		concordant	83.1404		1249.6	20.2
		1269.8	42.1	1249.9	18.6	1304	10		concordant	95.8512		1249.9	18.6
		1266.2	105	1257.4	46.7	1281	27		concordant	98.1577		1257.4	46.7
		1333.6	85.3	1257.4	42.1	1458	10		concordant	86.2414		1257.4	42.1
		1227.4	81.7	1260.8	21.5	1169	32		concordant	107.853		1260.8	21.5
		1257.2	161.1	1262.4	14.9	1248	68		concordant	101.154		1262.4	14.9
		1287.9	39.3	1267.8	16.2	1322	10		concordant	95.9002		1267.8	16.2
		1266.9	41.7	1270.3	11.9	1261	14		concordant	100.738		1270.3	11.9
		1292	56.7	1273.4	23.4	1323	14		concordant	96.2509		1273.4	23.4
		1258.7	39	1275.7	14.4	1230	12		concordant	103.715		1275.7	14.4
		1312.9	50.9	1276	12	1374	17		concordant	92.8675		1276	12
		1266	66.5	1277.5	13.3	1247	25		concordant	102.446		1277.5	13.3
		1283.3	57.7	1282.3	11.5	1285	21		concordant	99.7899		1282.3	11.5
		1287.5	75.5	1288.3	13.5	1286	28		concordant	100.179		1288.3	13.5
		1272.7	199.6	1293.1	21.9	1238	84		concordant	104.451		1293.1	21.9
		1345.9	60.9	1294.6	13.3	1428	19		concordant	90.6583		1294.6	13.3
		1294.4	91.5	1303.3	18.6	1280	33		concordant	101.82		1303.3	18.6
		1353.6	94	1314	16.5	1417	31		concordant	92.7311		1314	16.5
		1318.4	100.3	1315.9	26.9	1322	33		concordant	99.5386		1315.9	26.9
		1301.8	33	1318	14.5	1275	8		concordant	103.373		1318	14.5
		1316	186.1	1318.7	18.2	1312	73		concordant	100.511		1318.7	18.2
		1324.7	53.5	1327.5	16.8	1320	16		concordant	100.568		1327.5	16.8
		1365	40.5	1332.9	10.6	1416	12		concordant	94.1314		1332.9	10.6
		1379.8	51.2	1333.4	7.5	1452	16		concordant	91.832		1333.4	7.5
		1367.9	68.7	1338.4	13.9	1414	22		concordant	94.6535		1338.4	13.9
		1378	154.7	1338.9	11.8	1439	54		concordant	93.0438		1338.9	11.8
		1393.4	77.2	1347.7	10.2	1464	25		concordant	92.056		1347.7	10.2
		1388.9	63.6	1357.4	16.2	1438	18		concordant	94.395		1357.4	16.2
		1386	102.8	1362.6	37.1	1422	26		concordant	95.8228		1362.6	37.1
		1412.3	86.8	1364.1	15.8	1486	26		concordant	91.7968		1364.1	15.8
		1408.8	228.7	1365.1	18.7	1476	79		concordant	92.4864		1365.1	18.7
		1392.7	96.3	1369.1	12	1429	31		concordant	95.8083		1369.1	12
		1397	38	1370.1	13.6	1438	9		concordant	95.2782		1370.1	13.6
		1427.1	47.8	1372.1	14	1510	12		concordant	90.8675		1372.1	14
		1390.8	95	1376.4	15.3	1413	30		concordant	97.4098		1376.4	15.3
		1405.3	51.2	1378.8	10.9	1446	15		concordant	95.3527		1378.8	10.9
		1405.6	79.9	1382.3	13.6	1441	25		concordant	95.9264		1382.3	13.6
		1399.6	34.5	1396.2	6.9	1405	10		concordant	99.3737		1396.2	6.9
		1407.9	48	1399	9.6	1421	14		concordant	98.4518		1399	9.6
		1415.9	94	1413.2	8.5	1420	30		concordant	99.5211		1413.2	8.5
		1417.6	45.4	1418.2	11.2	1417	13		concordant	100.085		1418.2	11.2
		1433	35	1422.7	10	1448	9		concordant	98.2528		1422.7	10
		1512.2	136.4	1429.2	25.1	1630	36		concordant	87.681		1429.2	25.1
		1446.9	184.5	1437.7	41	1461	55		concordant	98.4052		1437.7	41
		1626	83.1	1474.7	23.8	1828	15		concordant	80.6729		1474.7	23.8
		1593.7	53	1489.3	10.9	1735	11		concordant	85.8386		1489.3	10.9
		1705.9	49.6	1694.5	17.8	1720	6		concordant	98.5174		1720	6
		1706.1	45.7	1680.4	18.5	1738	4		concordant	96.6858		1738	4
		1697.3	181.3	1659.5	19.5	1744	40		concordant	95.1548		1744	40
		1756.6	98.7	1760.7	11.6	1752	19		concordant	100.497		1752	19
		1731.4	71.7	1711.2	13.9	1756	13		concordant	97.4487		1756	13
		1719.8	74.6	1684	15.4	1764	14		concordant	95.4649		1764	14
		1718.3	70.8	1680.5	17.1	1765	12		concordant	95.2125		1765	12
		1752.3	83.5	1741.5	15.1	1765	15		concordant	98.6686		1765	15
		1733.6	88.9	1704.1	10.8	1769	18		concordant	96.3313		1769	18
		1762.7	57.8	1750.9	12.9	1777	10		concordant	98.5312		1777	10
		1769.4	84.7	1762.2	15.6	1778	15		concordant	99.1114		1778	15
		1758.1	64.5	1740	16.3	1780	10		concordant	97.7528		1780	10
		1784.3	86.7	1788.4	32.1	1780	9		concordant	100.472		1780	9
		1786.8	268.5	1788.5	12.7	1785	57		concordant	100.196		1785	57
		1746.2	85.7	1708.6	14.1	1792	16		concordant	95.346		1792	16
		1775.4	54.4	1761.7	16.6	1792	7		concordant	98.3092		1792	7
		1779.1	64.8	1762.5	17.6	1799	10		concordant	97.9711		1799	10
		1815.3	116.3	1814.8	9.9	1816	22		concordant	99.9339		1816	22
		1807	37.1	1781	12.2	1837	4		concordant	96.9516		1837	4
		1875	114.7	1837	20.3	1918	18		concordant	95.7769		1918	18
		1478.4	41.4	1341.9	8.3	1680	11		discordant	79.875
		1597.2	45.1	1546.5	13.4	1665	8		discordant	92.8829
		1651.5	53.8	1576.9	19	1748	7		discordant	90.2117
		1674.6	59.6	1595.9	12	1775	12		discordant	89.9099
		1648.8	61.5	1599.3	13.5	1713	12		discordant	93.3625
		1669.5	28.4	1624	9	1727	4		discordant	94.0359
		1732.5	41.8	1654.6	12.8	1828	6		discordant	90.5142
		1700.1	70.8	1657.4	11.7	1753	14		discordant	94.5465
		1780.4	60.5	1661.4	21	1923	6		discordant	86.3963
		1843.7	50.6	1805	14.4	1888	6		discordant	95.6038
		2393.4	101.9	2199.6	28.3	2563	2		discordant	85.8213
		2382.2	131.2	2218.7	37.8	2525	2		discordant	87.8693
T01-75-5
		1036.7	13.4	1011.7	5.4	1090	6		concordant	92.8165		1011.7	5.4
		1033.7	15.2	1015.5	4.8	1072	7		concordant	94.7295		1015.5	4.8
		1025.7	34.7	1023.2	4.7	1031	20		concordant	99.2435		1023.2	4.7
		1011	76.5	1036.7	6.8	955	46		concordant	108.555		1036.7	6.8
		1045.2	16.3	1043.7	7.4	1048	6		concordant	99.5897		1043.7	7.4
		1055.1	63.9	1053.5	10.2	1059	35		concordant	99.4806		1053.5	10.2
		1092.1	32.8	1086.2	16.8	1104	9		concordant	98.3877		1086.2	16.8
		1070	94.3	1102.3	16.7	1005	51		concordant	109.682		1102.3	16.7
		1132.7	27.2	1104.8	12.5	1186	8		concordant	93.1535		1104.8	12.5
		1139.8	34	1120.1	7.5	1178	15		concordant	95.0849		1120.1	7.5
		1142.9	60.6	1124.9	11.5	1177	28		concordant	95.5735		1124.9	11.5
		1149	52.7	1138.1	9.1	1170	24		concordant	97.2735		1138.1	9.1
		1129	56.6	1138.8	13.7	1110	26		concordant	102.595		1138.8	13.7
		1162.2	78.9	1147.6	13.4	1189	36		concordant	96.5181		1147.6	13.4
		1150.4	46	1147.7	8.3	1155	21		concordant	99.368		1147.7	8.3
		1171	76	1166	42.2	1180	13		concordant	98.8136		1166	42.2
		1184.9	32.8	1175.3	6.1	1202	14		concordant	97.7787		1175.3	6.1
		1209.9	71.7	1181.4	17.2	1261	28		concordant	93.6875		1181.4	17.2
		1173.4	69.7	1183.2	9.7	1155	32		concordant	102.442		1183.2	9.7
		1283.4	55.2	1241	10.1	1355	20		concordant	91.5867		1241	10.1
		1253.1	21.1	1242	10.1	1272	4		concordant	97.6415		1242	10.1
		1262.1	34.7	1243.1	9	1295	12		concordant	95.9923		1243.1	9
		1234.7	157	1245.5	13.7	1216	69		concordant	102.426		1245.5	13.7
		1266.9	52.3	1252.5	20.1	1291	15		concordant	97.0178		1252.5	20.1
		1272.6	202	1259.7	25.5	1295	84		concordant	97.2741		1259.7	25.5
		1275.8	28.3	1262.9	11.3	1298	8		concordant	97.2958		1262.9	11.3
		1358.2	26.7	1303.6	12.4	1445	4		concordant	90.2145		1303.6	12.4
		1390.2	87.4	1358.2	11.4	1440	28		concordant	94.3194		1358.2	11.4
		1393.8	35.9	1386.7	9	1405	10		concordant	98.6975		1386.7	9
		1409.4	62.2	1387	12.2	1443	19		concordant	96.1192		1387	12.2
		1405.4	108.9	1396.8	18.3	1418	34		concordant	98.5049		1396.8	18.3
		1422.5	66.1	1406.5	17.2	1447	18		concordant	97.2011		1406.5	17.2
		1425.1	88.4	1422.4	12.8	1429	27		concordant	99.5381		1422.4	12.8
		1524.6	79.7	1425.3	15.3	1665	20		concordant	85.6036		1425.3	15.3
		1436.4	49.2	1429.8	13.6	1446	13		concordant	98.8797		1429.8	13.6
		1432.3	76.2	1434.3	30.3	1429	16		concordant	100.371		1434.3	30.3
		1534.6	116.8	1439.4	27.3	1668	28		concordant	86.295		1439.4	27.3
		1455.7	49.9	1459.3	10.5	1450	14		concordant	100.641		1459.3	10.5
		1457.3	94.5	1471	35.2	1437	21		concordant	102.366		1471	35.2
		1477.2	65.5	1483.3	8.7	1468	19		concordant	101.042		1483.3	8.7
		1573.3	88.4	1488.8	12.5	1688	22		concordant	88.1991		1488.8	12.5
		1632.1	78.3	1629	15.3	1636	17		concordant	99.5721		1636	17
		1643.4	61.2	1637	14.5	1652	12		concordant	99.092		1652	12
		1623	131.7	1594	30.3	1661	29		concordant	95.9663		1661	29
		1642.6	69.9	1621.1	23.3	1670	11		concordant	97.0719		1670	11
		1688.3	54.5	1675.5	17.2	1704	9		concordant	98.3275		1704	9
		1682.1	28.3	1657	11.6	1714	2		concordant	96.6744		1714	2
		1695	128	1677.5	59.3	1717	2		concordant	97.6995		1717	2
		1703.6	27.6	1692.6	9.4	1717	4		concordant	98.5789		1717	4
		1688.3	52.6	1654	16	1731	8		concordant	95.5517		1731	8
		1713.9	101.7	1698.6	12.8	1733	21		concordant	98.015		1733	21
		1726.4	43.3	1710.4	17.4	1746	4		concordant	97.9611		1746	4
		1727.6	49.5	1712.1	17.1	1746	6		concordant	98.0584		1746	6
		1764.7	60	1753.2	16.1	1778	9		concordant	98.6052		1778	9
		1765.7	58	1750.7	20.5	1783	7		concordant	98.1884		1783	7
		1776.3	69.5	1737.5	17.7	1822	11		concordant	95.3622		1822	11
		1816.1	59.3	1777.9	19.4	1860	7		concordant	95.586		1860	7
		1942	104.2	1921.4	20.4	1964	15		concordant	97.831		1964	15
		2071.1	129.3	2087.1	29.3	2055	15		concordant	101.562		2055	15
		3157.9	136.1	3154.4	25.4	3160	2		concordant	99.8228		3160	2
		1547.8	41.1	1401.3	14.4	1754	6		discordant	79.8917
		1592.1	101.8	1514.2	33.5	1697	18		discordant	89.228
		1645.2	65.5	1519.5	18.2	1810	11		discordant	83.9503
		1620.2	62.7	1525.2	18.4	1746	11		discordant	87.354
		1628	76.6	1534.7	12	1751	17		discordant	87.6471
		1645	53.7	1551.4	13.3	1767	10		discordant	87.7985
		1637.3	47.2	1573.4	10.2	1720	10		discordant	91.4767
		1669.7	49.7	1599.5	19.3	1759	5		discordant	90.9323
		1648.3	46.8	1604.2	13.8	1705	8		discordant	94.088
		1702.4	77.6	1609.5	32.1	1819	4		discordant	88.4827
		1663.1	67.9	1613	20.3	1727	11		discordant	93.399
		1677.5	84.7	1634.1	10.2	1732	18		discordant	94.3476
		1712.1	48.5	1661.1	10.8	1775	9		discordant	93.5831
		1724.6	27.1	1685	8.8	1773	4		discordant	95.0367
		2341.9	279.1	2118.5	46.3	2543	25		discordant	83.3071
		2447.7	193.1	2316.9	31.5	2558	14		discordant	90.5747
Unkar Group, Hakatai Shale (Grand Canyon)
Reference: Mulder, J. A., Karlstrom, K. E. Fletcher, K., Heizler, M. T., Timmons, J. M., Crossey, L. J., Gehrels, G. E., and Pecha, M., 2017, The syn-orogenic sedimentary record of the Grenville Orogeny in southwest Laurentia. Precambrian Research, v. 294, 33–52, doi:10.1016/j.precamres.2017.03.006
					Apparent ages (Ma)
Analysis		207Pb*	±1σ	206Pb*	±1σ	206Pb*	±1σ		Overlaps 1:1 concordance at 2s?	6/8 vs 7/6 conc. (%)		Preffered age (1500Ma switch)	±1σ
		235U	(Ma)	238U*	(Ma)	207Pb*	(Ma)					(Ma)	(Ma)
Basal Hakatai
06GC154-20		1191.36	25.6909	1169.09	24.0573	1231.98	56.721		concordant	94.8954		1169.09	24.0573
06GC154-86		1273.56	48.0243	1170.11	48.9025	1452.7	90.9914		concordant	80.5473		1170.11	48.9025
06GC154-18		1206.38	18.7718	1178.8	10.773	1256.08	48.1866		concordant	93.8475		1178.8	10.773
06GC154-11		1194.9	29.3668	1181.32	31.4108	1219.54	58.9989		concordant	96.8658		1181.32	31.4108
06GC154-10		1212.6	39.8099	1191.59	57.1187	1250.18	39.3451		concordant	95.3139		1191.59	57.1187
06GC154-7		1219	25.0268	1194.44	32.1646	1262.73	37.7216		concordant	94.5925		1194.44	32.1646
06GC154-105		1209.57	23.832	1204.39	23.3996	1218.81	51.3737		concordant	98.8165		1204.39	23.3996
06GC154-34		1225.85	18.6607	1215.54	16.2849	1244.02	42.5211		concordant	97.7103		1215.54	16.2849
06GC154-39		1246.45	46.9132	1218.96	47.6475	1294.26	95.8178		concordant	94.1822		1218.96	47.6475
06GC154-63		1221.68	10.3102	1222.45	11.1354	1220.29	20.6675		concordant	100.177		1222.45	11.1354
06GC154-4		1218.74	34.3849	1225.23	34.0331	1207.27	74.1233		concordant	101.488		1225.23	34.0331
06GC154-96		1235.71	21.1937	1231.29	20.3994	1243.41	45.8598		concordant	99.0255		1231.29	20.3994
06GC154-22		1216.1	24.6596	1232.32	11.217	1187.4	65.8099		concordant	103.784		1232.32	11.217
06GC154-29		1223.71	19.418	1232.34	11.2171	1208.5	50.0289		concordant	101.973		1232.34	11.2171
06GC154-97		1242.62	25.3854	1245.14	13.9269	1238.25	65.1169		concordant	100.556		1245.14	13.9269
06GC154-90		1251.29	32.2105	1245.95	26.9641	1260.46	74.1252		concordant	98.8482		1245.95	26.9641
06GC154-100		1235.11	13.9589	1247.71	16.7891	1213.17	25.0887		concordant	102.848		1247.71	16.7891
06GC154-58		1243.86	24.8742	1250.54	13.4133	1232.31	64.0043		concordant	101.479		1250.54	13.4133
06GC154-64		1244.63	12.9328	1251.39	11.3742	1232.95	29.4315		concordant	101.495		1251.39	11.3742
06GC154-72		1249.49	13.936	1263.31	16.2907	1225.73	25.9259		concordant	103.066		1263.31	16.2907
06GC154-44		1265.84	20.3602	1268.59	11.5157	1261.16	51.4029		concordant	100.589		1268.59	11.5157
06GC154-42		1274.23	43.1118	1270.32	11.5299	1280.82	114.104		concordant	99.18		1270.32	11.5299
06GC154-95		1279.52	26.5192	1278.07	31.1867	1281.94	47.9266		concordant	99.6982		1278.07	31.1867
06GC154-57		1274.89	38.2665	1282.79	22.3338	1261.59	95.9056		concordant	101.68		1282.79	22.3338
06GC154-71		1289.09	11.7531	1282.92	11.6333	1299.36	24.5158		concordant	98.7349		1282.92	11.6333
06GC154-45		1282.99	11.0677	1289.39	11.6862	1272.28	22.3182		concordant	101.344		1289.39	11.6862
06GC154-37		1360.75	39.0647	1303.77	53.945	1451.39	47.5882		concordant	89.8292		1303.77	53.945
06GC154-36		1384.93	23.071	1335.33	27.3786	1462.2	38.7693		concordant	91.3232		1335.33	27.3786
06GC154-21		1396.62	22.8185	1339.08	29.9871	1485.58	32.208		concordant	90.1382		1339.08	29.9871
06GC154-38		1392.15	30.9048	1342.39	36.598	1469.22	52.0313		concordant	91.3681		1342.39	36.598
06GC154-77		1394.24	20.8736	1354.73	27.3696	1455.2	30.4385		concordant	93.0963		1354.73	27.3696
06GC154-82		1387.21	29.8522	1355.06	41.9192	1436.99	37.1875		concordant	94.2983		1355.06	41.9192
06GC154-46		1385.58	18.2309	1360.9	21.7154	1423.8	31.2855		concordant	95.5826		1360.9	21.7154
06GC154-81		1403.82	17.9679	1369.24	12.336	1456.71	40.7001		concordant	93.9959		1369.24	12.336
06GC154-87		1418.77	15.2981	1372.55	17.3078	1488.83	27.0851		concordant	92.1895		1372.55	17.3078
06GC154-80		1419.08	31.2794	1372.75	25.347	1489.3	67.0483		concordant	92.1742		1372.75	25.347
06GC154-16		1396.16	28.3829	1373.48	22.8851	1430.96	62.0529		concordant	95.9833		1373.48	22.8851
06GC154-104		1415.02	24.9331	1374.28	33.0461	1476.87	35.6591		concordant	93.0536		1374.28	33.0461
06GC154-68		1412.72	33.2055	1383.1	28.5059	1457.65	70.3831		concordant	94.8856		1383.1	28.5059
06GC154-28		1406.54	23.4991	1384.94	25.9226	1439.42	43.4695		concordant	96.2152		1384.94	25.9226
06GC154-30		1400.77	29.6458	1387.53	12.4837	1420.97	72.0744		concordant	97.647		1387.53	12.4837
06GC154-76		1413.75	28.2497	1390.22	43.5191	1449.39	23.9925		concordant	95.9175		1390.22	43.5191
06GC154-5		1423.89	22.6956	1391.09	26.7765	1473.27	38.9186		concordant	94.4218		1391.09	26.7765
06GC154-15		1419.38	21.9798	1391.53	19.0242	1461.39	46.3796		concordant	95.2192		1391.53	19.0242
06GC154-67		1408.14	33.1946	1396.46	23.6047	1425.83	75.0808		concordant	97.94		1396.46	23.6047
06GC154-70		1479.49	29.2998	1399.41	24.0268	1596.27	60.494		concordant	87.6673		1399.41	24.0268
06GC154-33		1422.25	15.2932	1400.71	12.5898	1454.64	32.9178		concordant	96.2927		1400.71	12.5898
06GC154-24		1421.88	24.1266	1403.71	12.614	1449.17	56.9351		concordant	96.863		1403.71	12.614
06GC154-23		1420.73	23.1676	1407.99	16.3165	1439.85	52.2418		concordant	97.7876		1407.99	16.3165
06GC154-27		1422.7	33.3426	1409.11	26.7072	1443.07	72.6189		concordant	97.6467		1409.11	26.7072
06GC154-66		1425.99	20.1633	1409.42	25.9528	1450.8	31.4084		concordant	97.148		1409.42	25.9528
06GC154-17		1426.69	17.7577	1411.38	12.6756	1449.6	39.7958		concordant	97.3632		1411.38	12.6756
06GC154-35		1429.94	15.7775	1412.35	15.2201	1456.21	31.7721		concordant	96.9875		1412.35	15.2201
06GC154-26		1445.1	20.5417	1414.85	12.7035	1489.88	46.7712		concordant	94.964		1414.85	12.7035
06GC154-52		1443.39	18.8225	1418.53	19.8636	1480.19	35.6483		concordant	95.8346		1418.53	19.8636
06GC154-89		1437.65	12.1317	1421.82	12.7594	1461.13	23.1934		concordant	97.3093		1421.82	12.7594
06GC154-93		1434.94	32.1551	1421.92	30.7523	1454.29	65.0839		concordant	97.7741		1421.92	30.7523
06GC154-40		1440.7	18.2864	1422.64	12.8937	1467.43	40.8377		concordant	96.9474		1422.64	12.8937
06GC154-12		1444.5	34.94	1426.64	48.6335	1470.88	46.8955		concordant	96.9924		1426.64	48.6335
06GC154-92		1437.03	21.9277	1426.79	22.9107	1452.21	42.2518		concordant	98.2491		1426.79	22.9107
06GC154-69		1433.71	29.4785	1427.97	38.5546	1442.23	45.3621		concordant	99.0108		1427.97	38.5546
06GC154-51		1444.04	15.6776	1430.03	15.262	1464.72	31.3547		concordant	97.6313		1430.03	15.262
06GC154-84		1451.62	20.8323	1430.97	25.5373	1481.98	34.5045		concordant	96.5583		1430.97	25.5373
06GC154-3		1452.93	33.4633	1431.89	30.6882	1483.82	68.4273		concordant	96.5005		1431.89	30.6882
06GC154-83		1443.66	13.5725	1433.07	12.8496	1459.28	27.5748		concordant	98.2038		1433.07	12.8496
06GC154-85		1444.37	18.7164	1434.4	14.2748	1459.07	41.0703		concordant	98.3091		1434.4	14.2748
06GC154-103		1455.08	12.8053	1435.98	16.9922	1483.07	18.9565		concordant	96.8249		1435.98	16.9922
06GC154-98		1446.84	15.5542	1436.68	16.6133	1461.78	29.4666		concordant	98.2828		1436.68	16.6133
06GC154-31		1440.07	14.2583	1438.13	19.2063	1442.93	20.9794		concordant	99.6679		1438.13	19.2063
06GC154-61		1450.7	19.962	1440.15	18.7141	1466.18	40.6542		concordant	98.2244		1440.15	18.7141
06GC154-13		1442.82	22.2024	1440.48	31.3687	1446.25	29.5203		concordant	99.6006		1440.48	31.3687
06GC154-78		1445.55	20.7693	1443.65	14.4864	1448.32	46.6564		concordant	99.6776		1443.65	14.4864
06GC154-8		1455.4	35.0854	1444.49	53.0589	1471.34	36.8264		concordant	98.1748		1444.49	53.0589
06GC154-102		1453.88	14.757	1445.43	17.61	1466.22	25.4547		concordant	98.5825		1445.43	17.61
06GC154-2		1456.82	22.9482	1452.94	24.1958	1462.46	43.9094		concordant	99.3492		1452.94	24.1958
06GC154-62		1445.22	28.2357	1453.93	43.4751	1432.4	28.6687		concordant	101.502		1453.93	43.4751
06GC154-88		1464.5	10.9683	1455.7	13.0305	1477.27	18.974		concordant	98.5401		1455.7	13.0305
06GC154-55		1457.69	28.6911	1457.16	19.5632	1458.44	64.4745		concordant	99.9122		1457.16	19.5632
06GC154-53		1468.17	16.9446	1462.23	13.0826	1476.75	36.8009		concordant	99.0171		1462.23	13.0826
06GC154-65		1461.2	21.1382	1462.59	14.0014	1459.15	47.7251		concordant	100.236		1462.59	14.0014
06GC154-6		1450.83	39.4809	1465.68	63.3235	1429.11	31.893		concordant	102.559		1465.68	63.3235
06GC154-41		1486.52	21.9568	1500.95	31.0655	1465.98	30.2071		concordant	102.386		1465.98	30.2071
06GC154-74		1443.03	18.6856	1469.84	22.4748	1403.72	32.9571		concordant	104.71		1469.84	22.4748
06GC154-43		1493.43	37.2167	1509.46	13.4576	1470.74	88.3121		concordant	102.633		1470.74	88.3121
06GC154-75		1457.39	17.147	1473.69	17.3894	1433.7	33.9602		concordant	102.789		1473.69	17.3894
06GC154-59		1466.37	14.0292	1474.13	15.5492	1455.13	26.0643		concordant	101.306		1474.13	15.5492
06GC154-47		1491.07	15.961	1502.19	13.4001	1475.27	33.776		concordant	101.825		1475.27	33.776
06GC154-32		1528.16	33.0266	1475.44	53.2795	1601.92	19.9655		concordant	92.1043		1475.44	53.2795
06GC154-94		1468.66	27.1253	1475.64	20.4435	1458.57	59.5326		concordant	101.17		1475.64	20.4435
06GC154-54		1463.7	19.3028	1475.79	13.1905	1446.18	43.4314		concordant	102.048		1475.79	13.1905
06GC154-99		1481.87	15.2406	1481.38	13.2349	1482.55	31.8417		concordant	99.9213		1481.38	13.2349
06GC154-50		1486.25	22.4781	1491.11	13.3122	1479.31	51.2107		concordant	100.797		1491.11	13.3122
06GC154-56		1491.64	17.1367	1492.23	13.3211	1490.79	36.93		concordant	100.097		1492.23	13.3211
06GC154-60		1480.41	26.1263	1492.95	42.6462	1462.46	19.0071		concordant	102.084		1492.95	42.6462
06GC154-91		1479.73	33.0189	1493.31	53.5863	1460.3	25.4738		concordant	102.26		1493.31	53.5863
06GC154-73		1484.19	17.8621	1498.4	19.2529	1463.92	33.8275		concordant	102.356		1498.4	19.2529
06GC154-49		1519.98	11.7821	1506.54	13.4345	1538.74	20.9014		concordant	97.9075		1538.74	20.9014
06GC154-101		1647.87	12.4838	1656.61	14.6087	1636.73	21.5454		concordant	101.214		1636.73	21.5454
06GC154-14		1604.27	24.9167	1570.41	35.6805	1649.02	32.086		concordant	95.233		1649.02	32.086
06GC154-9		1622.49	36.3776	1599.95	48.3157	1651.84	54.1334		concordant	96.8584		1651.84	54.1334
06GC154-1		1682.69	18.1927	1702.67	23.7923	1657.86	28.5259		concordant	102.703		1657.86	28.5259
06GC154-25		1696.55	27.0959	1693.42	14.8926	1700.41	57.672		concordant	99.5892		1700.41	57.672
06GC154-79		1707.37	25.8873	1655.86	38.4062	1771.15	31.0481		concordant	93.4911		1771.15	31.0481
06GC154-48		2420.01	24.1397	2385.05	19.9357	2449.54	40.9517		concordant	97.3669		2449.54	40.9517
T050108-4
T051084-38		1187.78	23.6953	1156.17	14.1525	1245.79	60.8863		concordant	92.8057		1156.17	14.1525
T051084-21		1169.42	41.2547	1160.09	58.1315	1186.72	45.3787		concordant	97.7554		1160.09	58.1315
T051084-47		1197.36	13.6867	1166.43	11.7308	1253.6	31.4215		concordant	93.0462		1166.43	11.7308
T051084-54		1211.06	20.2203	1166.7	17.7508	1291.02	45.2378		concordant	90.3707		1166.7	17.7508
T051084-15		1193.52	26.7502	1179.97	18.3104	1218.1	67.0784		concordant	96.8696		1179.97	18.3104
T051084-4		1190.96	19.0084	1182.72	8.1455	1205.93	51.294		concordant	98.0752		1182.72	8.1455
T051084-8		1220.24	45.7931	1183.38	12.9081	1285.99	123.439		concordant	92.0213		1183.38	12.9081
T051084-34		1244.65	19.9122	1190.15	12.6271	1340.22	48.715		concordant	88.8027		1190.15	12.6271
T051084-20		1229.37	40.783	1195.41	16.8342	1289.4	107.247		concordant	92.7109		1195.41	16.8342
T051084-10		1274.53	26.5929	1207.55	8.08725	1389.34	68.8845		concordant	86.9158		1207.55	8.08725
T051084-18		1209.52	25.3197	1209.78	8.13368	1209.04	69.0182		concordant	100.061		1209.78	8.13368
T051084-1		1264.74	10.3484	1215	6.25761	1350.35	25.37		concordant	89.9767		1215	6.25761
T051084-12		1197.65	31.0333	1215.54	10.817	1165.48	85.2756		concordant	104.295		1215.54	10.817
T051084-17		1235.43	40.8171	1226.33	10.7753	1251.32	110.186		concordant	98.0027		1226.33	10.7753
T051084-29		1308.49	22.5191	1226.61	19.4138	1445.32	48.0064		concordant	84.8678		1226.61	19.4138
T051084-44		1240.75	11.0528	1226.64	7.22065	1265.31	27.3669		concordant	96.9439		1226.64	7.22065
T051084-16		1258.51	23.2517	1226.69	15.4147	1313.33	56.502		concordant	93.4031		1226.69	15.4147
T051084-13		1251.5	44.1751	1230.35	13.6537	1288.06	117.192		concordant	95.52		1230.35	13.6537
T051084-35		1220.5	29.4916	1236.28	21.1284	1192.71	73.0911		concordant	103.653		1236.28	21.1284
T051084-30		1219.97	18.7425	1237.56	16.3527	1188.97	43.5229		concordant	104.087		1237.56	16.3527
T051084-25		1275.19	31.1127	1239	8.37323	1336.71	81.5915		concordant	92.69		1239	8.37323
T051084-43		1268.68	21.7167	1256.31	8.21941	1289.7	56.6473		concordant	97.411		1256.31	8.21941
T051084-9		1284.99	11.2152	1259.59	13.314	1327.69	19.4832		concordant	94.871		1259.59	13.314
T051084-51		1273.24	33.8148	1266.9	43.628	1283.95	52.6839		concordant	98.6724		1266.9	43.628
T051084-32		1248.67	22.4502	1267.06	9.92457	1217.06	59.0585		concordant	104.108		1267.06	9.92457
T051084-27		1325.43	30.6706	1268.36	35.0755	1418.9	53.6742		concordant	89.3904		1268.36	35.0755
T051084-33		1264.53	16.1598	1271.97	15.2024	1251.86	35.3255		concordant	101.607		1271.97	15.2024
T051084-46		1376.13	42.5737	1316.07	54.3678	1470.57	63.0469		concordant	89.4936		1316.07	54.3678
T051084-6		1326.56	14.14	1320.41	12.4317	1336.48	30.95		concordant	98.7973		1320.41	12.4317
T051084-24		1333.52	22.7618	1333.37	17.4411	1333.75	52.2767		concordant	99.9718		1333.37	17.4411
T051084-41		1379.57	13.7934	1358.45	10.2122	1412.4	31.1304		concordant	96.1797		1358.45	10.2122
T051084-50		1466	24.3788	1388.32	27.6239	1580.37	41.7587		concordant	87.8477		1388.32	27.6239
T051084-40		1419	22.367	1433.3	14.3838	1397.58	51.8333		concordant	102.556		1433.3	14.3838
T051084-37		1445.8	24.9449	1433.88	27.877	1463.36	45.6228		concordant	97.985		1433.88	27.877
T051084-42		1444.26	12.1065	1441.35	9.19051	1448.53	26.668		concordant	99.5037		1441.35	9.19051
T051084-23		1461.34	19.1333	1445.42	14.4529	1484.53	41.7465		concordant	97.3655		1445.42	14.4529
T051084-31		1456.35	14.1193	1465.29	8.69738	1443.31	32.4005		concordant	101.523		1465.29	8.69738
T051084-22		1478.66	11.1146	1479.29	10.1968	1477.73	22.7715		concordant	100.106		1479.29	10.1968
T051084-28		1535.93	20.5783	1491.36	30.5493	1597.82	22.7858		concordant	93.3369		1491.36	30.5493
T051084-11		1493.19	13.2713	1496.11	7.45003	1489.03	30.3447		concordant	100.476		1496.11	7.45003
T051084-39		1565.37	22.7579	1559.07	23.2501	1573.86	43.1504		concordant	99.0604		1573.86	43.1504
T051084-7		1641.67	24.2742	1632.59	20.9666	1653.3	48.2615		concordant	98.7469		1653.3	48.2615
T051084-53		1692.94	12.1105	1678.12	10.1237	1711.33	23.9253		concordant	98.0596		1711.33	23.9253
T051084-5		1653.54	18.7487	1599.25	8.51801	1723.2	40.7236		concordant	92.807		1723.2	40.7236
T051084-36		1734.75	28.9475	1734.01	15.9019	1735.61	60.8983		concordant	99.9078		1735.61	60.8983
T051084-26		3175.21	17.2764	3227.47	37.3669	3142.35	15.8835		concordant	102.709		3142.35	15.8835
T051084-52		1512.22	21.7612	1296.51	30.1938	1828.86	18.541		discordant	70.892
T051084-19		1661.06	23.143	1584.52	31.633	1759.21	31.3481		discordant	90.0702
T051084-3		1771.21	18.3607	1686.26	28.8749	1872.86	18.1496		discordant	90.0369
K16-77-1
Karlstrom-K16-77-1-29June2016-Spot 98		1188.24	11.8712	1130.12	16.3941	1295.6	11.8605		concordant	87.2274		1130.12	16.3941
Karlstrom-K16-77-1-29June2016-Spot 70		1214.21	13.6398	1155.53	19.0458	1320.07	13.2415		concordant	87.5356		1155.53	19.0458
Karlstrom-K16-77-1-29June2016-Spot 75		1205.63	19.0834	1184.26	28.3052	1244.14	13.3746		concordant	95.1875		1184.26	28.3052
Karlstrom-K16-77-1-29June2016-Spot 22		1198.37	21.5497	1186.48	31.6929	1219.9	17.9138		concordant	97.2602		1186.48	31.6929
Karlstrom-K16-77-1-29June2016-Spot 35		1212.77	24.5875	1189.39	36.0277	1254.61	20.1024		concordant	94.8015		1189.39	36.0277
Karlstrom-K16-77-1-29June2016-Spot 34		1206.89	23.6916	1196.54	34.9778	1225.44	19.6097		concordant	97.6412		1196.54	34.9778
Karlstrom-K16-77-1-29June2016-Spot 93		1209.14	22.5534	1199.26	33.548	1226.81	17.3597		concordant	97.754		1199.26	33.548
Karlstrom-K16-77-1-29June2016-Spot 9		1228.56	22.1033	1200.78	32.1789	1277.63	19.396		concordant	93.9847		1200.78	32.1789
Karlstrom-K16-77-1-29June2016-Spot 29		1209.01	21.6539	1201.22	31.7884	1222.93	19.3961		concordant	98.2242		1201.22	31.7884
Karlstrom-K16-77-1-29June2016-Spot 63		1206.28	12.5445	1206.19	18.3207	1206.47	12.2099		concordant	99.9775		1206.19	18.3207
Karlstrom-K16-77-1-29June2016-Spot 83		1279.03	27.0185	1206.62	38.2183	1402.83	25.223		concordant	86.0136		1206.62	38.2183
Karlstrom-K16-77-1-29June2016-Spot 48		1222.77	27.5616	1208.78	40.5719	1247.51	23.8121		concordant	96.8956		1208.78	40.5719
Karlstrom-K16-77-1-29June2016-Spot 58		1216.95	20.7939	1213.55	31.5258	1222.96	13.5373		concordant	99.2299		1213.55	31.5258
Karlstrom-K16-77-1-29June2016-Spot 96		1216.77	13.4413	1214.49	20.0691	1220.81	10.8804		concordant	99.4821		1214.49	20.0691
Karlstrom-K16-77-1-29June2016-Spot 68		1218.85	27.3253	1214.65	41.1946	1226.29	19.3704		concordant	99.0502		1214.65	41.1946
Karlstrom-K16-77-1-29June2016-Spot 28		1223.09	27.5292	1215.45	41.4413	1236.61	19.533		concordant	98.2893		1215.45	41.4413
Karlstrom-K16-77-1-29June2016-Spot 24		1223.35	15.7966	1215.47	23.8307	1237.29	10.8738		concordant	98.2366		1215.47	23.8307
Karlstrom-K16-77-1-29June2016-Spot 92		1218.71	19.6993	1218	29.9066	1219.95	13.0867		concordant	99.8408		1218	29.9066
Karlstrom-K16-77-1-29June2016-Spot 15		1225.96	30.1886	1218.91	43.7588	1238.4	30.6874		concordant	98.4261		1218.91	43.7588
Karlstrom-K16-77-1-29June2016-Spot 31		1213.03	18.1855	1219.19	27.657	1202.06	12.4309		concordant	101.425		1219.19	27.657
Karlstrom-K16-77-1-29June2016-Spot 20		1226.73	23.6239	1220.82	35.337	1237.15	18.7134		concordant	98.6799		1220.82	35.337
Karlstrom-K16-77-1-29June2016-Spot 80		1213.28	17.9146	1222.04	27.0655	1197.76	13.7844		concordant	102.027		1222.04	27.0655
Karlstrom-K16-77-1-29June2016-Spot 8		1233.88	25.2483	1225.35	38.3488	1248.83	16.1921		concordant	98.12		1225.35	38.3488
Karlstrom-K16-77-1-29June2016-Spot 64		1240.87	30.2716	1225.79	45.3693	1267.17	22.562		concordant	96.7349		1225.79	45.3693
Karlstrom-K16-77-1-29June2016-Spot 1		1223.6	23.5458	1226.8	36.0112	1217.96	14.8495		concordant	100.725		1226.8	36.0112
Karlstrom-K16-77-1-29June2016-Spot 54		1246.15	36.7324	1228.54	55.0726	1276.71	27.0432		concordant	96.2268		1228.54	55.0726
Karlstrom-K16-77-1-29June2016-Spot 30		1228.24	20.017	1231.72	29.8181	1222.12	17.7746		concordant	100.786		1231.72	29.8181
Karlstrom-K16-77-1-29June2016-Spot 47		1234.28	17.6672	1231.87	26.8195	1238.51	12.3376		concordant	99.464		1231.87	26.8195
Karlstrom-K16-77-1-29June2016-Spot 76		1238.39	24.0712	1232.33	36.1594	1248.94	18.8005		concordant	98.6706		1232.33	36.1594
Karlstrom-K16-77-1-29June2016-Spot 13		1232.43	24.8612	1232.49	37.1048	1232.33	21.3848		concordant	100.013		1232.49	37.1048
Karlstrom-K16-77-1-29June2016-Spot 100		1234.44	16.5401	1232.8	24.3496	1237.32	15.808		concordant	99.6347		1232.8	24.3496
Karlstrom-K16-77-1-29June2016-Spot 53		1244.24	24.3892	1233.17	36.7967	1263.44	17.577		concordant	97.6041		1233.17	36.7967
Karlstrom-K16-77-1-29June2016-Spot 79		1243.84	16.0261	1233.36	23.6506	1262.02	14.5542		concordant	97.7288		1233.36	23.6506
Karlstrom-K16-77-1-29June2016-Spot 78		1235	23.9907	1233.97	36.3383	1236.82	17.5292		concordant	99.7699		1233.97	36.3383
Karlstrom-K16-77-1-29June2016-Spot 73		1232.56	21.8214	1235.22	33.3408	1227.9	14.5075		concordant	100.596		1235.22	33.3408
Karlstrom-K16-77-1-29June2016-Spot 89		1224.21	14.5906	1235.32	21.243	1204.69	15.7173		concordant	102.542		1235.32	21.243
Karlstrom-K16-77-1-29June2016-Spot 42		1241.55	25.2173	1237.69	38.7088	1248.23	14.7617		concordant	99.1557		1237.69	38.7088
Karlstrom-K16-77-1-29June2016-Spot 12		1249.83	34.355	1238.53	52.4735	1269.32	20.8122		concordant	97.5744		1238.53	52.4735
Karlstrom-K16-77-1-29June2016-Spot 110		1237.9	21.1886	1238.65	31.8303	1236.61	17.4423		concordant	100.165		1238.65	31.8303
Karlstrom-K16-77-1-29June2016-Spot 49		1247.03	41.4422	1240.02	63.3712	1259.19	25.5922		concordant	98.4773		1240.02	63.3712
Karlstrom-K16-77-1-29June2016-Spot 87		1237.28	23.9961	1241.9	36.5336	1229.23	17.4916		concordant	101.03		1241.9	36.5336
Karlstrom-K16-77-1-29June2016-Spot 60		1250.1	26.2835	1255.15	40.4785	1241.41	17.1399		concordant	101.107		1255.15	40.4785
Karlstrom-K16-77-1-29June2016-Spot 26		1266.7	21.675	1262.71	33.1565	1273.46	15.1725		concordant	99.1556		1262.71	33.1565
Karlstrom-K16-77-1-29June2016-Spot 67		1281.88	29.8678	1268.16	46.2456	1304.93	16.0449		concordant	97.1816		1268.16	46.2456
Karlstrom-K16-77-1-29June2016-Spot 84		1275.24	13.8501	1276.68	21.0312	1272.83	11.3693		concordant	100.303		1276.68	21.0312
Karlstrom-K16-77-1-29June2016-Spot 55		1274.91	15.6651	1281.92	23.9571	1263.12	12.4437		concordant	101.488		1281.92	23.9571
Karlstrom-K16-77-1-29June2016-Spot 71		1277.98	17.114	1286.91	26.1445	1262.99	14.0682		concordant	101.893		1286.91	26.1445
Karlstrom-K16-77-1-29June2016-Spot 10		1282.02	19.1959	1288.53	29.8152	1271.12	12.8072		concordant	101.37		1288.53	29.8152
Karlstrom-K16-77-1-29June2016-Spot 33		1283.96	19.9609	1295.38	31.141	1264.92	13.2426		concordant	102.408		1295.38	31.141
Karlstrom-K16-77-1-29June2016-Spot 103		1312.64	17.9589	1295.91	27.118	1340.06	15.049		concordant	96.7052		1295.91	27.118
Karlstrom-K16-77-1-29June2016-Spot 90		1348.81	19.1556	1297.77	28.6193	1430.69	15.4712		concordant	90.7093		1297.77	28.6193
Karlstrom-K16-77-1-29June2016-Spot 4		1278.48	18.8037	1300.21	29.3084	1242.15	13.7465		concordant	104.674		1300.21	29.3084
Karlstrom-K16-77-1-29June2016-Spot 108		1311.7	17.3849	1301.08	27.0813	1329.08	10.4061		concordant	97.8929		1301.08	27.0813
Karlstrom-K16-77-1-29June2016-Spot 105		1333.66	21.5731	1307.22	33.2976	1376.34	13.9053		concordant	94.978		1307.22	33.2976
Karlstrom-K16-77-1-29June2016-Spot 104		1318.9	18.979	1313.74	29.0379	1327.28	15.4436		concordant	98.9801		1313.74	29.0379
Karlstrom-K16-77-1-29June2016-Spot 57		1332.12	20.1292	1315.09	31.3461	1359.58	12.4273		concordant	96.7281		1315.09	31.3461
Karlstrom-K16-77-1-29June2016-Spot 11		1323.35	16.629	1316.41	25.706	1334.61	12.1376		concordant	98.6363		1316.41	25.706
Karlstrom-K16-77-1-29June2016-Spot 21		1352.8	33.599	1318.1	46.9132	1408.06	41.5276		concordant	93.6112		1318.1	46.9132
Karlstrom-K16-77-1-29June2016-Spot 23		1326.3	17.086	1320.12	25.9118	1336.28	15.1381		concordant	98.7911		1320.12	25.9118
Karlstrom-K16-77-1-29June2016-Spot 36		1323.67	14.7914	1321.46	22.6448	1327.24	12.3428		concordant	99.5641		1321.46	22.6448
Karlstrom-K16-77-1-29June2016-Spot 81		1328.76	20.3027	1329.38	31.8313	1327.73	13.4534		concordant	100.125		1329.38	31.8313
Karlstrom-K16-77-1-29June2016-Spot 82		1324.73	15.4855	1330.71	23.8434	1315.05	12.9588		concordant	101.191		1330.71	23.8434
Karlstrom-K16-77-1-29June2016-Spot 91		1329.6	23.6434	1331.82	37.1379	1325.99	15.5379		concordant	100.44		1331.82	37.1379
Karlstrom-K16-77-1-29June2016-Spot 95		1325.04	21.8448	1336.09	34.3477	1307.21	15.1547		concordant	102.209		1336.09	34.3477
Karlstrom-K16-77-1-29June2016-Spot 72		1327.68	16.7567	1336.54	26.1568	1313.39	12.5822		concordant	101.763		1336.54	26.1568
Karlstrom-K16-77-1-29June2016-Spot 6		1330.91	22.8866	1341.71	36.5435	1313.58	12.5514		concordant	102.141		1341.71	36.5435
Karlstrom-K16-77-1-29June2016-Spot 69		1344.82	30.8197	1342.48	48.7831	1348.54	18.1567		concordant	99.55		1342.48	48.7831
Karlstrom-K16-77-1-29June2016-Spot 45		1342.8	19.615	1343.37	30.6143	1341.86	14.4642		concordant	100.113		1343.37	30.6143
Karlstrom-K16-77-1-29June2016-Spot 94		1361.27	22.1705	1356.56	34.7155	1368.66	15.99		concordant	99.1159		1356.56	34.7155
Karlstrom-K16-77-1-29June2016-Spot 38		1422.59	19.4601	1357.3	25.3894	1521.67	27.7211		concordant	89.1982		1357.3	25.3894
Karlstrom-K16-77-1-29June2016-Spot 107		1361.81	21.2804	1361.8	32.6893	1361.81	18.8901		concordant	99.9988		1361.8	32.6893
Karlstrom-K16-77-1-29June2016-Spot 102		1375.44	16.899	1366.74	25.7289	1388.97	15.6683		concordant	98.3997		1366.74	25.7289
Karlstrom-K16-77-1-29June2016-Spot 62		1377.31	19.3258	1372.39	30.3891	1384.92	13.9422		concordant	99.0957		1372.39	30.3891
Karlstrom-K16-77-1-29June2016-Spot 5		1382.03	22.6477	1372.7	36.1231	1396.46	12.9746		concordant	98.2989		1372.7	36.1231
Karlstrom-K16-77-1-29June2016-Spot 43		1364.21	22.5613	1375.51	36.4098	1346.54	12.1355		concordant	102.151		1375.51	36.4098
Karlstrom-K16-77-1-29June2016-Spot 88		1375.65	21.9266	1376.89	34.863	1373.7	14.3911		concordant	100.232		1376.89	34.863
Karlstrom-K16-77-1-29June2016-Spot 97		1383	25.4412	1377.9	40.3798	1390.87	16.5832		concordant	99.067		1377.9	40.3798
Karlstrom-K16-77-1-29June2016-Spot 51		1377.25	17.274	1387.68	26.9685	1361.08	14.725		concordant	101.954		1387.68	26.9685
Karlstrom-K16-77-1-29June2016-Spot 14		1385.57	21.247	1392.11	33.8185	1375.5	14.9158		concordant	101.208		1392.11	33.8185
Karlstrom-K16-77-1-29June2016-Spot 25		1393.55	15.6957	1399.16	24.9212	1384.95	11.5388		concordant	101.027		1399.16	24.9212
Karlstrom-K16-77-1-29June2016-Spot 41		1393.96	20.404	1400.99	32.6827	1383.19	13.658		concordant	101.287		1400.99	32.6827
Karlstrom-K16-77-1-29June2016-Spot 37		1415.18	19.8465	1411.96	32.1386	1420	11.0269		concordant	99.4345		1411.96	32.1386
Karlstrom-K16-77-1-29June2016-Spot 17		1404.51	15.8418	1415.99	24.4767	1387.1	15.2204		concordant	102.083		1415.99	24.4767
Karlstrom-K16-77-1-29June2016-Spot 3		1393.7	21.1209	1417.22	34.1784	1357.86	14.2214		concordant	104.372		1417.22	34.1784
Karlstrom-K16-77-1-29June2016-Spot 85		1434.56	15.1292	1421.71	23.4433	1453.65	13.4806		concordant	97.8027		1421.71	23.4433
Karlstrom-K16-77-1-29June2016-Spot 18		1433.82	21.3555	1423.77	34.0647	1448.73	14.9868		concordant	98.2768		1423.77	34.0647
Karlstrom-K16-77-1-29June2016-Spot 7		1457.15	21.972	1423.82	34.8049	1506.08	15.1353		concordant	94.5382		1423.82	34.8049
Karlstrom-K16-77-1-29June2016-Spot 61		1437.56	25.5263	1425.51	41.2398	1455.41	14.9593		concordant	97.9456		1425.51	41.2398
Karlstrom-K16-77-1-29June2016-Spot 19		1419.86	32.0381	1426.86	52.5069	1409.35	16.2406		concordant	101.242		1426.86	52.5069
Karlstrom-K16-77-1-29June2016-Spot 56		1404.18	20.0985	1427.09	32.6848	1369.56	13.0648		concordant	104.2		1427.09	32.6848
Karlstrom-K16-77-1-29June2016-Spot 86		1418.57	22.731	1430.59	36.9042	1400.55	14.4596		concordant	102.145		1430.59	36.9042
Karlstrom-K16-77-1-29June2016-Spot 44		1433.74	22.1113	1430.99	34.9881	1437.82	17.6146		concordant	99.5247		1430.99	34.9881
Karlstrom-K16-77-1-29June2016-Spot 2		1442.47	25.9165	1432.68	42.3077	1456.9	13.1052		concordant	98.3378		1432.68	42.3077
Karlstrom-K16-77-1-29June2016-Spot 99		1461.94	33.9518	1434.68	54.2087	1501.76	22.5923		concordant	95.5334		1434.68	54.2087
Karlstrom-K16-77-1-29June2016-Spot 74		1460.79	22.2656	1456.09	36.4551	1467.62	12.5838		concordant	99.214		1456.09	36.4551
Karlstrom-K16-77-1-29June2016-Spot 50		1444.39	18.175	1457.67	28.7916	1424.89	15.8854		concordant	102.3		1457.67	28.7916
Karlstrom-K16-77-1-29June2016-Spot 27		1449.29	18.3612	1458.77	29.4118	1435.4	14.5713		concordant	101.628		1458.77	29.4118
Karlstrom-K16-77-1-29June2016-Spot 106		1506.4	30.21	1460.94	46.2531	1570.91	28.284		concordant	92.9994		1460.94	46.2531
Karlstrom-K16-77-1-29June2016-Spot 109		1445.76	20.4215	1462.1	32.9232	1421.8	15.7751		concordant	102.835		1462.1	32.9232
Karlstrom-K16-77-1-29June2016-Spot 39		1616.15	17.8639	1606.19	29.716	1629.12	13.2792		concordant	98.5928		1629.12	13.2792
Karlstrom-K16-77-1-29June2016-Spot 16		1674.78	23.2798	1684.35	40.901	1662.79	12.2514		concordant	101.296		1662.79	12.2514
Karlstrom-K16-77-1-29June2016-Spot 40		1715.78	20.0176	1713.17	35.2183	1718.94	11.0779		concordant	99.664		1718.94	11.0779
Karlstrom-K16-77-1-29June2016-Spot 77		1729.6	23.2808	1722.24	40.9107	1738.51	13.3211		concordant	99.064		1738.51	13.3211
Karlstrom-K16-77-1-29June2016-Spot 52		1742.13	16.5349	1730.25	28.7099	1756.39	11.0098		concordant	98.512		1756.39	11.0098
Reference: Timmons, J.M., Karlstrom, K.E., Heizler, M.T., Bowring, S.A., Gehrels, G.E., Crossey, L. J., 2005. Tectonic inferences from the ca. 1255–1100 Ma Unkar Group and Nankoweap Formation, Grand Canyon: intracratonic deformation and basin formation during protracted Grenville orogenesis. Geol. Soc. Am. Bull. 117, 1573–1595. petrology of the Mesoproterozoic Unkar Group, Grand Canyon, U.S.A.: P…
					Apparent ages (Ma)
Analysis		207Pb*	±1σ	206Pb*	±1σ	206Pb*	±1σ		Overlaps 1:1 concordance at 2s?	6/8 vs 7/6 conc. (%)		Preffered age (1500Ma switch)	±1σ
		235U	(Ma)	238U*	(Ma)	207Pb*	(Ma)					(Ma)	(Ma)
LC-02-81-2 Hakatai Formation
		1179.3	64	1111.1	12.6	1307	27		concordant	85.0115		1111.1	12.6
		1204.9	30	1151.2	13.3	1303	8		concordant	88.35		1151.2	13.3
		1220.4	75.4	1177.5	10.4	1297	31		concordant	90.7864		1177.5	10.4
		1153.2	166.3	1182.4	11.3	1099	84		concordant	107.589		1182.4	11.3
		1228.1	48.9	1188.3	15.8	1299	17		concordant	91.4781		1188.3	15.8
		1240.8	59.8	1195.4	19.6	1321	20		concordant	90.4921		1195.4	19.6
		1229	44.9	1220.8	6.6	1243	18		concordant	98.214		1220.8	6.6
		1296.7	141	1226	14.3	1416	54		concordant	86.5819		1226	14.3
		1207.9	134.7	1238.4	14.5	1154	61		concordant	107.314		1238.4	14.5
		1250.7	56.1	1240.5	10.5	1268	22		concordant	97.8312		1240.5	10.5
		1241.8	58.1	1240.8	9.5	1244	23		concordant	99.7428		1240.8	9.5
		1249.5	107.7	1241.2	7.7	1264	45		concordant	98.1962		1241.2	7.7
		1238.2	66.1	1242.6	11.6	1231	26		concordant	100.942		1242.6	11.6
		1236.1	82.6	1245.3	9.3	1220	34		concordant	102.074		1245.3	9.3
		1259.9	80.9	1246.6	11.1	1283	32		concordant	97.1629		1246.6	11.1
		1295.9	203	1246.6	22.3	1379	81		concordant	90.3988		1246.6	22.3
		1273.3	177.1	1248.3	9.1	1316	74		concordant	94.8556		1248.3	9.1
		1248.9	145.1	1248.7	16.6	1249	61		concordant	99.976		1248.7	16.6
		1254.4	60.1	1248.7	7.7	1264	24		concordant	98.7896		1248.7	7.7
		1265.9	67.8	1249.2	8.4	1294	26		concordant	96.5379		1249.2	8.4
		1249.5	71.1	1249.3	8.9	1250	29		concordant	99.944		1249.3	8.9
		1228.1	80.7	1250.9	11.1	1188	34		concordant	105.295		1250.9	11.1
		1254.9	42.9	1250.9	9.6	1262	16		concordant	99.1204		1250.9	9.6
		1216.3	102.6	1251	10.6	1155	45		concordant	108.312		1251	10.6
		1256.4	51.1	1251.4	5.3	1265	20		concordant	98.9249		1251.4	5.3
		1273.1	57.4	1251.9	11.4	1309	21		concordant	95.6379		1251.9	11.4
		1266.7	126.9	1253.9	12.6	1288	51		concordant	97.3525		1253.9	12.6
		1265.9	55.9	1254.2	13	1286	20		concordant	97.5272		1254.2	13
		1265.2	208.5	1255.9	12.5	1281	89		concordant	98.0406		1255.9	12.5
		1268.9	93.9	1256	9.4	1291	37		concordant	97.2889		1256	9.4
		1293.5	63.7	1257.3	9.8	1354	23		concordant	92.8582		1257.3	9.8
		1245.7	110	1257.6	9.1	1225	46		concordant	102.661		1257.6	9.1
		1262	44.5	1259.1	8.8	1267	17		concordant	99.3765		1259.1	8.8
		1252.6	64	1259.5	16.6	1241	23		concordant	101.491		1259.5	16.6
		1244.4	108	1259.9	11	1218	45		concordant	103.44		1259.9	11
		1275.6	153.7	1261.1	8.2	1300	63		concordant	97.0077		1261.1	8.2
		1277.6	83.7	1261.2	15.6	1305	31		concordant	96.6437		1261.2	15.6
		1248.3	100.4	1262.1	11.3	1225	41		concordant	103.029		1262.1	11.3
		1252	91.1	1262.4	14.4	1234	36		concordant	102.301		1262.4	14.4
		1267.4	101.2	1264.6	13.8	1272	40		concordant	99.4182		1264.6	13.8
		1237.1	99.9	1265.9	17.2	1187	41		concordant	106.647		1265.9	17.2
		1268.8	56.6	1266.6	20.5	1273	17		concordant	99.4973		1266.6	20.5
		1274	441.4	1266.9	16.8	1286	211		concordant	98.5148		1266.9	16.8
		1261.7	61.5	1267.5	8.5	1252	24		concordant	101.238		1267.5	8.5
		1244.8	71.5	1267.9	6.3	1205	30		concordant	105.22		1267.9	6.3
		1279.1	97.1	1268.3	14.6	1297	37		concordant	97.7872		1268.3	14.6
		1236.2	110.7	1274.5	4.9	1170	48		concordant	108.932		1274.5	4.9
		1289.6	122.9	1276.3	10.5	1312	48		concordant	97.279		1276.3	10.5
		1278.8	62.2	1277.4	7.3	1281	24		concordant	99.719		1277.4	7.3
		1265.4	91.5	1282.1	15	1237	36		concordant	103.646		1282.1	15
		1304	99	1283.9	13.6	1337	37		concordant	96.0284		1283.9	13.6
		1273.6	71.3	1286	13.3	1253	27		concordant	102.634		1286	13.3
		1296.7	75.1	1288.2	7	1311	28		concordant	98.2609		1288.2	7
		1288.1	224.7	1288.7	29.3	1287	92		concordant	100.132		1288.7	29.3
		1278.6	95.6	1288.8	14.8	1262	37		concordant	102.124		1288.8	14.8
		1287.4	216.4	1289.1	14.3	1284	90		concordant	100.397		1289.1	14.3
		1257	35.6	1291.1	7.7	1199	13		concordant	107.681		1291.1	7.7
		1280.2	129	1293	12.2	1259	52		concordant	102.701		1293	12.2
		1254.5	237.9	1293.4	12.6	1188	106		concordant	108.872		1293.4	12.6
		1292.3	58.7	1301.4	5.4	1277	22		concordant	101.911		1301.4	5.4
		1295	70.3	1306.8	9.3	1275	26		concordant	102.494		1306.8	9.3
		1307.5	256	1311	8.1	1302	106		concordant	100.691		1311	8.1
		1289.8	110.4	1313.8	6.5	1250	44		concordant	105.104		1313.8	6.5
		1319.7	149.2	1320.9	19.1	1318	56		concordant	100.22		1320.9	19.1
		1315.8	100.2	1321.4	11.8	1307	37		concordant	101.102		1321.4	11.8
		1316.5	89.6	1322.7	12.1	1306	33		concordant	101.279		1322.7	12.1
		1299	327.3	1332.3	45.3	1245	140		concordant	107.012		1332.3	45.3
		1351.1	234.5	1334	14.7	1378	89		concordant	96.807		1334	14.7
		1364.6	66.9	1356.2	11.1	1378	22		concordant	98.418		1356.2	11.1
		1388.5	143.8	1361.9	34.3	1430	45		concordant	95.2378		1361.9	34.3
		1446.7	89.7	1436.6	10.1	1462	27		concordant	98.2627		1436.6	10.1
		1447.2	56.3	1438.2	12.7	1460	15		concordant	98.5068		1438.2	12.7
		1439.3	44.9	1440.6	14	1437	11		concordant	100.251		1440.6	14
		1445.8	38.7	1441.6	9.6	1452	10		concordant	99.2837		1441.6	9.6
		1440.4	107.2	1459.2	16.9	1413	33		concordant	103.27		1459.2	16.9
		1458.4	110	1459.7	10.7	1456	33		concordant	100.254		1459.7	10.7
		1584.6	48.8	1466.4	8.1	1746	11		concordant	83.9863		1466.4	8.1
		1558.9	57.3	1468.3	10.6	1684	13		concordant	87.1912		1468.3	10.6
		1569.2	107.6	1483.9	45.8	1686	12		concordant	88.013		1483.9	45.8
		1566.5	81.8	1492.3	8.9	1668	21		concordant	89.4664		1492.3	8.9
		1563.9	96.3	1520.5	40.7	1623	12		concordant	93.6845		1623	12
		1644.2	71.9	1621.6	19.5	1673	14		concordant	96.9277		1673	14
		1770.4	63.3	1768.6	13.5	1773	11		concordant	99.7518		1773	11
		1616.5	82.8	1516.3	9.7	1750	19		discordant	86.6457
		1597.9	64.1	1556.6	9.6	1653	15		discordant	94.1682
Reference: Bloch, J., Timmons, M., Crossey, L.J., Gehrels, G.E., Karlstrom, K.E., 2006. Mudstone petrology of the Mesoproterozoic Unkar Group, Grand Canyon, U.S.A.: Provenance, weathering, and sediment transport on intracratonic Rodinia. J. Sediment. Res. 76, 1106–1119.
					Apparent ages (Ma)
Analysis		207Pb*	±1σ	206Pb*	±1σ	206Pb*	±1σ		Overlaps 1:1 concordance at 2s?	6/8 vs 7/6 conc. (%)		Preffered age (1500Ma switch)	±1σ
		235U	(Ma)	238U*	(Ma)	207Pb*	(Ma)					(Ma)	(Ma)
LC-02-76-7 Top of Hakatai Formation
		1133.2	196.7	1118.1	19.7	1162	102		concordant	96.222		1133.2	196.7
		1139.2	54.8	1117.6	9.5	1181	25		concordant	94.6317		1139.2	54.8
		1163.7	188.9	1168.1	12.7	1156	94		concordant	101.047		1163.7	188.9
		1166.4	119.2	1163.3	19.4	1172	55		concordant	99.2577		1166.4	119.2
		1169.5	157.4	1150.8	16.8	1204	75		concordant	95.5814		1169.5	157.4
		1176.4	179	1177.5	12.9	1174	87		concordant	100.298		1176.4	179
		1179.9	125.7	1173.3	14.9	1192	58		concordant	98.4312		1179.9	125.7
		1195.9	107.8	1167.4	10.9	1248	48		concordant	93.5417		1195.9	107.8
		1207.5	83.4	1183.3	17.6	1251	34		concordant	94.5883		1207.5	83.4
		1209.4	176.6	1223.2	23.8	1185	80		concordant	103.224		1209.4	176.6
		1220.1	327.8	1188.8	17.7	1276	159		concordant	93.1661		1220.1	327.8
		1222.9	82.1	1254.1	14.9	1168	34		concordant	107.372		1222.9	82.1
		1236	62.2	1245.6	11.1	1219	25		concordant	102.182		1236	62.2
		1241.5	121.8	1243.9	11.4	1237	51		concordant	100.558		1241.5	121.8
		1245.1	139.3	1248.5	21.7	1239	58		concordant	100.767		1245.1	139.3
		1245.1	173.2	1258.9	18.2	1221	75		concordant	103.104		1245.1	173.2
		1246.3	115.7	1273.4	34.6	1200	43		concordant	106.117		1246.3	115.7
		1248.7	97.7	1282.5	14.1	1191	40		concordant	107.683		1248.7	97.7
		1256.4	214.9	1260.1	35.9	1250	91		concordant	100.808		1256.4	214.9
		1260.4	54.6	1278.1	12	1230	20		concordant	103.911		1260.4	54.6
		1262.8	164.3	1279.6	23.9	1234	68		concordant	103.695		1262.8	164.3
		1264.7	111.7	1244.4	14.9	1299	44		concordant	95.7968		1264.7	111.7
		1265.8	95.5	1262.3	44.6	1272	23		concordant	99.2374		1265.8	95.5
		1268.7	138.2	1269	14.8	1268	56		concordant	100.079		1268.7	138.2
		1270.5	119	1286.3	13.6	1244	48		concordant	103.4		1270.5	119
		1275	112.2	1278.2	14.9	1269	44		concordant	100.725		1275	112.2
		1276	102.7	1279.9	15	1269	40		concordant	100.859		1276	102.7
		1282.1	122.5	1266.5	23.5	1308	46		concordant	96.8272		1282.1	122.5
		1286.9	113.3	1273.3	18.5	1310	43		concordant	97.1985		1286.9	113.3
		1291.9	105.2	1287.2	11.4	1300	41		concordant	99.0154		1291.9	105.2
		1292.4	212.2	1283.1	32.6	1308	85		concordant	98.0963		1292.4	212.2
		1297.8	180.2	1288.1	18.4	1314	72		concordant	98.0289		1297.8	180.2
		1327.3	152.7	1260.8	9.1	1436	57		concordant	87.7994		1327.3	152.7
		1341.3	84.6	1302.1	29.9	1404	23		concordant	92.7422		1341.3	84.6
		1347.4	81.4	1308.5	12.5	1410	28		concordant	92.8014		1347.4	81.4
		1359.8	138.4	1303.9	28.8	1449	46		concordant	89.9862		1359.8	138.4
		1365.7	63	1310.6	12.5	1453	20		concordant	90.1996		1365.7	63
		1365.7	108.1	1340.1	42.9	1406	26		concordant	95.3129		1365.7	108.1
		1366.2	143.6	1305	24.5	1463	48		concordant	89.2003		1366.2	143.6
		1369.3	190.3	1305.9	29.1	1470	66		concordant	88.8367		1369.3	190.3
		1371.9	169.6	1336.5	29.4	1428	58		concordant	93.5924		1371.9	169.6
		1375.2	167.7	1349.4	51.3	1415	50		concordant	95.364		1375.2	167.7
		1375.5	137.7	1353.7	14.2	1410	47		concordant	96.0071		1375.5	137.7
		1396.6	161.4	1356.8	40.3	1458	49		concordant	93.059		1396.6	161.4
		1397.2	107.4	1383.8	15.5	1418	35		concordant	97.5882		1397.2	107.4
		1413.4	108.4	1414.7	31.3	1411	30		concordant	100.262		1413.4	108.4
		1421	240.4	1409.2	46.1	1439	79		concordant	97.9291		1421	240.4
		1425.4	226.2	1407.1	16.9	1453	77		concordant	96.841		1425.4	226.2
		1432.4	160.9	1427.6	18.6	1440	52		concordant	99.1389		1432.4	160.9
		1609.9	236.1	1603.6	78.4	1618	48		concordant	99.11		1618	48
		1520.1	241.9	1448.9	40.7	1621	68		concordant	89.3831		1621	68
		1553.5	121.5	1501.5	31.5	1625	28		concordant	92.4		1625	28
		1581	115.6	1478.7	14.7	1720	28		concordant	85.9709		1720	28
		1579.1	234.4	1475.2	82.2	1721	44		concordant	85.7176		1721	44
		1728.8	93.7	1715.8	20.9	1745	17		concordant	98.3266		1745	17
		1634.7	130.4	1559	30.5	1733	27		discordant	89.9596
Unkar Group, Bass Formation (Grand Canyon)
Reference: Mulder, J. A., Karlstrom, K. E. Fletcher, K., Heizler, M. T., Timmons, J. M., Crossey, L. J., Gehrels, G. E., and Pecha, M., 2017, The syn-orogenic sedimentary record of the Grenville Orogeny in southwest Laurentia. Precambrian Research, v. 294, 33–52, doi:10.1016/j.precamres.2017.03.006
					Apparent ages (Ma)
Analysis		207Pb*	±1σ	206Pb*	±1σ	206Pb*	±1σ		Overlaps 1:1 concordance at 2s?	6/8 vs 7/6 conc. (%)		Preffered age (1500Ma switch)	±1σ
		235U	(Ma)	238U*	(Ma)	207Pb*	(Ma)					(Ma)	(Ma)
Bass Sandstone-64		1244.02	35.7844	1223.28	42.8981	1280.09	61.8128		concordant	95.5617		1223.28	42.8981
Bass Sandstone-81		1238.46	21.4008	1241.83	27.561	1232.58	33.9278		concordant	100.75		1241.83	27.561
Bass Sandstone-72		1240.47	45.984	1247.23	65.7741	1228.73	53.9076		concordant	101.506		1247.23	65.7741
Bass Sandstone-34		1265.07	33.8188	1262.8	44.3821	1268.92	51.1698		concordant	99.5172		1262.8	44.3821
Bass Sandstone-101		1260.45	29.3931	1271.05	27.9171	1242.36	64.1404		concordant	102.309		1271.05	27.9171
Bass Sandstone-14		1455.86	72.427	1280.51	106.157	1721.99	36.1961		concordant	74.3622		1280.51	106.157
Bass Sandstone-17		1292.96	32.3583	1291.65	30.3156	1295.1	69.7696		concordant	99.7335		1291.65	30.3156
Bass Sandstone-78		1372	52.5875	1313.36	16.8727	1464.49	130.027		concordant	89.6803		1313.36	16.8727
Bass Sandstone-89		1335.52	36.1289	1328.98	12.8501	1345.99	91.6182		concordant	98.7359		1328.98	12.8501
Bass Sandstone-100		1354.67	31.991	1330.05	34.7325	1393.73	60.4604		concordant	95.4308		1330.05	34.7325
Bass Sandstone-52		1319.42	25.5305	1331.96	30.9267	1299.08	44.9273		concordant	102.532		1331.96	30.9267
Bass Sandstone-70		1365.07	34.7885	1340.64	37.7656	1403.51	65.6123		concordant	95.5208		1340.64	37.7656
Bass Sandstone-63		1545.25	47.0922	1364.12	59.6301	1802.64	62.0399		concordant	75.6735		1364.12	59.6301
Bass Sandstone-56		1409.64	46.6272	1397.16	17.5858	1428.54	113.723		concordant	97.8032		1397.16	17.5858
Bass Sandstone-16		1388.47	46.3347	1399.48	70.9537	1371.58	45.6691		concordant	102.035		1399.48	70.9537
Bass Sandstone-25		1548.49	43.2425	1400.2	64.5669	1757.17	33.1081		concordant	79.6851		1400.2	64.5669
Bass Sandstone-93		1452.82	18.9269	1421.91	21.4372	1498.31	33.7163		concordant	94.9012		1421.91	21.4372
Bass Sandstone-49		1448.66	23.9124	1450.73	35.0755	1445.6	28.9536		concordant	100.355		1450.73	35.0755
Bass Sandstone-65		1621.13	31.8034	1475.26	45.2296	1816.04	34.7119		concordant	81.2346		1475.26	45.2296
Bass Sandstone-67		1523.76	61.6343	1539.89	98.7688	1501.41	56.3854		concordant	102.563		1501.41	56.3854
Bass Sandstone-73		1516.46	18.7046	1511	28.2868	1524.08	20.9243		concordant	99.1423		1524.08	20.9243
Bass Sandstone-87		1541.28	23.8532	1545.65	34.633	1535.28	30.9122		concordant	100.675		1535.28	30.9122
Bass Sandstone-7		1537.11	18.9248	1519.99	29.3838	1560.72	18.7604		concordant	97.3902		1560.72	18.7604
Bass Sandstone-86		1621.06	14.6047	1618.13	14.3103	1624.84	27.919		concordant	99.5875		1624.84	27.919
Bass Sandstone-4		1642.92	17.2298	1649.05	22.5529	1635.08	26.766		concordant	100.855		1635.08	26.766
Bass Sandstone-96		1692.54	29.957	1700.91	48.7384	1682.17	29.7366		concordant	101.114		1682.17	29.7366
Bass Sandstone-18		1693.53	15.6753	1702.5	20.1993	1682.42	24.7534		concordant	101.194		1682.42	24.7534
Bass Sandstone-5		1709.05	28.1689	1721.71	34.9036	1693.55	46.1598		concordant	101.662		1693.55	46.1598
Bass Sandstone-32		1661.14	26.0958	1635.59	28.4585	1693.57	46.2855		concordant	96.5765		1693.57	46.2855
Bass Sandstone-75		1708.49	28.6084	1711.48	35.4741	1704.81	46.5883		concordant	100.391		1704.81	46.5883
Bass Sandstone-103		1679.29	17.9977	1650.99	28.4023	1714.82	18.3927		concordant	96.2774		1714.82	18.3927
Bass Sandstone-8		1713.41	17.6979	1707.65	28.3537	1720.45	18.3792		concordant	99.2556		1720.45	18.3792
Bass Sandstone-45		1697.34	28.7645	1678.45	42.116	1720.73	36.9366		concordant	97.5431		1720.73	36.9366
Bass Sandstone-57		1728.71	14.4475	1732.22	18.8357	1724.45	22.413		concordant	100.451		1724.45	22.413
Bass Sandstone-2		1727.82	11.7421	1728.95	15.1651	1726.43	18.3632		concordant	100.146		1726.43	18.3632
Bass Sandstone-74		1722.28	22.1093	1710.77	33.8084	1736.27	26.2253		concordant	98.5311		1736.27	26.2253
Bass Sandstone-3		1729.41	12.4092	1722.89	16.7818	1737.29	18.3388		concordant	99.1711		1737.29	18.3388
Bass Sandstone-95		1762.93	18.3073	1776.94	21.5877	1746.36	30.956		concordant	101.751		1746.36	30.956
Bass Sandstone-90		1748.69	21.9794	1737.67	33.2054	1761.88	27.0626		concordant	98.6256		1761.88	27.0626
Bass Sandstone-29		1760.72	13.7409	1756.75	15.3773	1765.41	23.8285		concordant	99.5097		1765.41	23.8285
Bass Sandstone-48		1766.18	36.8366	1765.28	61.7704	1767.23	33.4354		concordant	99.89		1767.23	33.4354
Bass Sandstone-97		1775.37	26.9001	1779.05	44.7753	1771.04	25.7505		concordant	100.452		1771.04	25.7505
Bass Sandstone-9		1684.18	31.5082	1612.9	35.3888	1774.11	53.3181		concordant	90.9134		1774.11	53.3181
Bass Sandstone-10		1751.24	35.3621	1729.52	58.1004	1777.24	33.0301		concordant	97.3151		1777.24	33.0301
Bass Sandstone-41		1794.45	28	1804.69	48.1681	1782.55	23.7058		concordant	101.242		1782.55	23.7058
Bass Sandstone-13		1800.17	41.1703	1814.19	65.6248	1783.96	46.8641		concordant	101.695		1783.96	46.8641
Bass Sandstone-98		1779.74	21.7492	1775.57	33.5241	1784.62	26.0713		concordant	99.493		1784.62	26.0713
Bass Sandstone-59		1789.4	34.0959	1791.68	52.7163	1786.73	41.0122		concordant	100.277		1786.73	41.0122
Bass Sandstone-24		1784.87	18.1874	1782.47	19.1544	1787.67	32.4454		concordant	99.7091		1787.67	32.4454
Bass Sandstone-23		1796.67	27.6026	1804.16	41.0739	1787.97	36.0803		concordant	100.906		1787.97	36.0803
Bass Sandstone-80		1803.38	27.7969	1810.85	38.9954	1794.73	39.699		concordant	100.898		1794.73	39.699
Bass Sandstone-85		1800.23	18.7396	1802.9	30.1967	1797.12	20.387		concordant	100.322		1797.12	20.387
Bass Sandstone-19		1815.18	16.3288	1827.31	15.9116	1801.27	30.053		concordant	101.446		1801.27	30.053
Bass Sandstone-99		1820.23	26.1564	1834.26	41.1872	1804.2	30.9219		concordant	101.666		1804.2	30.9219
Bass Sandstone-91		1782.23	20.0488	1761.15	28.3559	1806.99	27.6392		concordant	97.4631		1806.99	27.6392
Bass Sandstone-20		1815.59	23.8063	1818.68	32.1687	1812.02	35.4347		concordant	100.368		1812.02	35.4347
Bass Sandstone-21		1836.42	24.2405	1857.28	23.0756	1812.85	44.8872		concordant	102.451		1812.85	44.8872
Bass Sandstone-54		1831.82	25.1376	1846.81	33.7225	1814.81	37.9661		concordant	101.763		1814.81	37.9661
Bass Sandstone-77		1835.22	28.2973	1851.08	25.2618	1817.26	53.3869		concordant	101.861		1817.26	53.3869
Bass Sandstone-92		1813.82	18.7601	1809.49	15.7772	1818.78	35.9671		concordant	99.4891		1818.78	35.9671
Bass Sandstone-82		1806.97	12.9932	1796.09	15.6759	1819.53	21.2387		concordant	98.7119		1819.53	21.2387
Bass Sandstone-44		1829.24	18.0114	1835.04	20.7607	1822.63	30.4842		concordant	100.681		1822.63	30.4842
Bass Sandstone-83		1752.04	28.0436	1690.54	42.0839	1826.2	32.8324		concordant	92.5714		1826.2	32.8324
Bass Sandstone-61		1834.92	21.2106	1838.23	29.2687	1831.14	30.8367		concordant	100.387		1831.14	30.8367
Bass Sandstone-71		1832.26	15.0134	1823.17	23.1854	1842.58	18.101		concordant	98.9466		1842.58	18.101
Bass Sandstone-1		1844.84	20.6035	1833.55	31.4385	1857.58	25.4752		concordant	98.706		1857.58	25.4752
Bass Sandstone-27		1858.55	27.005	1852.67	45.2478	1865.11	26.3584		concordant	99.3326		1865.11	26.3584
Bass Sandstone-15		1884.6	25.1632	1901.51	28.3238	1866	42.9639		concordant	101.903		1866	42.9639
Bass Sandstone-40		1872.67	19.3724	1871.85	20.3074	1873.56	34.0812		concordant	99.909		1873.56	34.0812
Bass Sandstone-46		1898.81	25.401	1910.38	37.0347	1886.17	34.7501		concordant	101.283		1886.17	34.7501
Bass Sandstone-26		1895.38	15.2463	1899.28	19.9053	1891.11	23.3945		concordant	100.432		1891.11	23.3945
Bass Sandstone-62		1890.5	34.9218	1889.29	60.1021	1891.82	31.6777		concordant	99.8663		1891.82	31.6777
Bass Sandstone-36		1883.95	41.0926	1875.83	74.3827	1892.91	26.0931		concordant	99.0977		1892.91	26.0931
Bass Sandstone-11		1907.8	23.057	1917.98	36.4977	1896.73	27.5141		concordant	101.12		1896.73	27.5141
Bass Sandstone-6		1907.82	24.8554	1914.7	16.5653	1900.33	48.7154		concordant	100.756		1900.33	48.7154
Bass Sandstone-39		1915.83	21.267	1924.35	33.1078	1906.6	26.2271		concordant	100.931		1906.6	26.2271
Bass Sandstone-51		1921.31	12.9488	1921.43	16.6153	1921.17	20.0826		concordant	100.014		1921.17	20.0826
Bass Sandstone-38		1917.79	39.1317	1913.98	69.8857	1921.9	29.9414		concordant	99.5877		1921.9	29.9414
Bass Sandstone-60		1939.43	26.3673	1948.41	40.1887	1929.84	33.8652		concordant	100.962		1929.84	33.8652
Bass Sandstone-58		1941.07	20.3219	1950.78	27.774	1930.72	29.9241		concordant	101.039		1930.72	29.9241
Bass Sandstone-53		1966.43	26.5669	1977.92	28.4449	1954.33	45.7268		concordant	101.207		1954.33	45.7268
Bass Sandstone-68		1959.82	23.348	1952.98	35.3831	1967.03	29.9582		concordant	99.286		1967.03	29.9582
Bass Sandstone-47		2039.83	17.3424	2047.06	17.5388	2032.52	30.0899		concordant	100.715		2032.52	30.0899
Bass Sandstone-79		2228.95	14.8114	2222.3	18.7973	2235.05	22.5202		concordant	99.4296		2235.05	22.5202
Bass Sandstone-31		2442.95	32.3081	2451.08	24.6714	2436.17	55.584		concordant	100.612		2436.17	55.584
Bass Sandstone-88		2336.08	37.355	2212.47	50.9399	2445.87	51.6334		concordant	90.4574		2445.87	51.6334
Bass Sandstone-94		2456.61	17.2988	2438.39	32.0784	2471.7	16.8798		concordant	98.6525		2471.7	16.8798
Bass Sandstone-76		2515.76	28.6871	2515.05	44.7738	2516.33	37.1478		concordant	99.9494		2516.33	37.1478
Bass Sandstone-35		2541.54	31.9571	2543.24	44.3425	2540.17	45.2748		concordant	100.12		2540.17	45.2748
Bass Sandstone-69		2533.76	24.1778	2523.33	44.0589	2542.1	25.3137		concordant	99.2614		2542.1	25.3137
Bass Sandstone-37		2473.22	37.8595	2374.29	78.6548	2555.52	16.7486		concordant	92.9084		2555.52	16.7486
Bass Sandstone-33		2600.35	29.4394	2606.95	46.1019	2595.2	38.1957		concordant	100.453		2595.2	38.1957
Bass Sandstone-28		2625.35	31.8006	2629.46	64.7791	2622.18	26.115		concordant	100.277		2622.18	26.115
Bass Sandstone-43		2674.95	17.686	2672.1	24.0626	2677.09	25.1569		concordant	99.8136		2677.09	25.1569
Bass Sandstone-12		2680.29	19.7748	2677.46	24.978	2682.41	29.1149		concordant	99.8154		2682.41	29.1149
Bass Sandstone-50		1406.02	20.1583	1150.91	21.713	1817.14	30.213		discordant	63.3366
Bass Sandstone-66		1560.56	17.1963	1387.69	12.9844	1803.03	34.3764		discordant	76.9643
Bass Sandstone-55		1690.04	23.1682	1595.99	14.1377	1808.76	47.8123		discordant	88.2368
Bass Sandstone-84		2204.31	75.8654	1937.33	132.378	2462.71	48.6753		discordant	78.6667
Bass Ash
Bass Ash-69		1183.85	10.8627	1116.38	13.2959	1309.31	16.6138		concordant	85.2649		1116.38	13.2959
Bass Ash-45		1389.67	60.9853	1148.59	73.3524	1781.97	73.2817		concordant	64.4563		1148.59	73.3524
Bass Ash-70		1176.34	42.9694	1152.74	49.7877	1219.99	78.0578		concordant	94.488		1152.74	49.7877
Bass Ash-75		1233.19	19.3177	1164.16	23.0888	1355.95	31.2141		concordant	85.8559		1164.16	23.0888
Bass Ash-62		1196.07	46.9288	1166.8	43.2273	1249.33	103.884		concordant	93.3936		1166.8	43.2273
Bass Ash-2B		1209.23	30.5521	1169.44	28.7679	1280.98	65.9269		concordant	91.2921		1169.44	28.7679
Bass Ash-85		1231.86	16.0569	1182.26	20.6002	1319.7	23.1418		concordant	89.5855		1182.26	20.6002
Bass Ash-68		1204.41	20.9291	1190.15	26.234	1230.05	33.8626		concordant	96.7567		1190.15	26.234
Bass Ash-87		1238.54	22.246	1190.42	26.1964	1323.25	38.0325		concordant	89.9617		1190.42	26.1964
Bass Ash-17		1196.35	24.0324	1193.76	27.4879	1201.01	45.4939		concordant	99.3962		1193.76	27.4879
Bass Ash-9A		1194.56	29.0394	1194.16	29.2254	1195.25	62.0895		concordant	99.909		1194.16	29.2254
Bass Ash-26		1191.08	13.1987	1195.46	16.5989	1183.11	21.9063		concordant	101.044		1195.46	16.5989
Bass Ash-52		1253.01	32.5129	1197.2	40.0364	1350.21	50.9283		concordant	88.668		1197.2	40.0364
Bass Ash-37		1213.31	30.6188	1197.31	38.7467	1241.87	48.474		concordant	96.4117		1197.31	38.7467
Bass Ash-51		1252.45	17.4614	1197.7	20.5278	1347.83	29.6523		concordant	88.8612		1197.7	20.5278
Bass Ash-17B		1202.14	25.7393	1198.02	30.0709	1209.53	47.3104		concordant	99.0485		1198.02	30.0709
Bass Ash-23		1204.23	27.1401	1198.44	29.9923	1214.63	53.0942		concordant	98.6673		1198.44	29.9923
Bass Ash-48		1237.23	14.113	1199.89	17.8689	1302.86	21.5443		concordant	92.0966		1199.89	17.8689
Bass Ash-92		1222.56	16.3037	1200.01	16.9865	1262.57	33.0054		concordant	95.0443		1200.01	16.9865
Bass Ash-6A		1240.9	16.3703	1201.16	19.8797	1310.56	26.9747		concordant	91.6525		1201.16	19.8797
Bass Ash-30		1228.45	12.212	1202.68	15.2838	1273.94	19.4718		concordant	94.4069		1202.68	15.2838
Bass Ash-58		1228.54	27.9355	1203.83	25.1777	1272.17	62.0334		concordant	94.6281		1203.83	25.1777
Bass Ash-7A		1237.58	19.04	1208.05	21.6091	1289.35	35.0178		concordant	93.6941		1208.05	21.6091
Bass Ash-84		1284.47	26.3651	1208.44	31.9649	1413.98	41.3262		concordant	85.4637		1208.44	31.9649
Bass Ash-29		1230.41	14.5366	1209.35	15.0805	1267.49	29.5078		concordant	95.413		1209.35	15.0805
Bass Ash-2A		1225.87	22.598	1211.39	24.7979	1251.4	43.9118		concordant	96.8033		1211.39	24.7979
Bass Ash-19		1215.06	20.1831	1213.27	21.9285	1218.22	40.2054		concordant	99.5939		1213.27	21.9285
Bass Ash-79		1246.46	15.6674	1213.75	19.6677	1303.41	24.5858		concordant	93.1212		1213.75	19.6677
Bass Ash-36		1419.52	50.2099	1214.86	62.7955	1741.47	60.5286		concordant	69.7608		1214.86	62.7955
Bass Ash-14		1234.24	11.4053	1215.47	14.6785	1267.16	17.3923		concordant	95.9215		1215.47	14.6785
Bass Ash-50		1227.94	14.2272	1217.24	18.7392	1246.77	20.8511		concordant	97.6313		1217.24	18.7392
Bass Ash-60		1236.29	10.4784	1217.92	13.6067	1268.42	15.6785		concordant	96.0187		1217.92	13.6067
Bass Ash-80		1248.33	19.9485	1218.04	25.1836	1300.95	31.0899		concordant	93.6269		1218.04	25.1836
Bass Ash-65		1250.82	11.5118	1219.52	14.8842	1305.08	17.016		concordant	93.4446		1219.52	14.8842
Bass Ash-33		1230.75	17.3837	1220.72	21.7475	1248.34	28.4757		concordant	97.788		1220.72	21.7475
Bass Ash-42		1265.81	9.78279	1223.36	12.6156	1338.66	14.2899		concordant	91.3865		1223.36	12.6156
Bass Ash-3B		1251.82	13.5172	1225.67	17.1837	1297.07	20.9373		concordant	94.4951		1225.67	17.1837
Bass Ash-61		1239.23	14.2764	1227.44	18.3345	1259.76	22.174		concordant	97.435		1227.44	18.3345
Bass Ash-3A		1249.53	12.0035	1228.06	14.9359	1286.71	19.5142		concordant	95.4419		1228.06	14.9359
Bass Ash-66		1253.77	13.8873	1229.68	17.8696	1295.35	21.0523		concordant	94.9302		1229.68	17.8696
Bass Ash-35		1437.19	52.73	1243	65.0017	1737.63	68.3749		concordant	71.5347		1243	65.0017
Bass Ash-77		1257.69	20.8528	1245.03	26.7871	1279.4	32.3899		concordant	97.3134		1245.03	26.7871
Bass Ash-11		1289.74	25.6837	1248.31	32.1597	1359.4	40.125		concordant	91.828		1248.31	32.1597
Bass Ash-73		1258.16	17.5707	1248.48	22.7377	1274.74	27.0249		concordant	97.9401		1248.48	22.7377
Bass Ash-5A		1279.09	19.2392	1257.74	22.8046	1315.14	33.6646		concordant	95.6355		1257.74	22.8046
Bass Ash-49		1263.32	19.3776	1263.96	25.3448	1262.21	29.6965		concordant	100.138		1263.96	25.3448
Bass Ash-76		1279.27	21.2041	1276.03	26.9714	1284.7	34.1201		concordant	99.3249		1276.03	26.9714
Bass Ash-10A		1290.7	23.3991	1281.3	27.4202	1306.35	42.0399		concordant	98.0823		1281.3	27.4202
Bass Ash-93		1592.33	79.5078	1320.22	103.571	1973.94	83.9966		concordant	66.8825		1320.22	103.571
Bass Ash-86		1420.84	14.5309	1362.24	17.2254	1509.77	24.1925		concordant	90.2287		1362.24	17.2254
Bass Ash-16		1461.83	30.8192	1372.72	39.6483	1593.8	43.93		concordant	86.1288		1372.72	39.6483
Bass Ash-91		1421.45	10.5289	1373.82	14.2864	1493.52	14.1742		concordant	91.9852		1373.82	14.2864
Bass Ash-41		1454.9	12.4902	1400.53	17.2322	1535.22	16.1458		concordant	91.2267		1400.53	17.2322
Bass Ash-55		1662.66	77.0787	1446.71	111.829	1947.3	66.9265		concordant	74.2934		1446.71	111.829
Bass Ash-25		1584.61	29.7339	1480.36	42.883	1726.25	32.9597		concordant	85.756		1480.36	42.883
Bass Ash-83		1587.36	69.718	1565.33	107.478	1616.73	73.0983		concordant	96.8207		1616.73	73.0983
Bass Ash-78		1716.98	9.62901	1743.81	15.5479	1684.4	10.3759		concordant	103.527		1684.4	10.3759
Bass Ash-72		1670.52	18.5698	1630.6	28.9815	1721.04	19.1624		concordant	94.7451		1721.04	19.1624
Bass Ash-18		1733.73	16.4591	1732.15	26.0752	1735.62	18.0879		concordant	99.7996		1735.62	18.0879
Bass Ash-21		1712.91	13.9376	1677.38	21.8269	1756.61	14.78		concordant	95.4896		1756.61	14.78
Bass Ash-31		1736.32	14.3459	1716.37	22.9881	1760.42	14.7083		concordant	97.4979		1760.42	14.7083
Bass Ash-32		1771.57	27.9555	1776.24	45.6464	1766.05	28.7688		concordant	100.577		1766.05	28.7688
Bass Ash-24		1776.53	9.48452	1758.17	15.6384	1798.17	9.01665		concordant	97.7756		1798.17	9.01665
Bass Ash-90		1115.28	6.96987	848.64	6.76437	1679.87	10.7177		discordant	50.5183
Bass Ash-34		1242.22	7.91996	876.078	7.84134	1948.91	9.86786		discordant	44.9521
Bass Ash-57		1152.88	11.6378	936.054	12.3947	1587.12	17.0044		discordant	58.9782
Bass Ash-67		1154.4	18.0204	1034.11	20.3236	1387.82	29.1274		discordant	74.5136
Bass Ash-22		1346.69	6.41356	1065.96	7.31031	1825.72	7.81898		discordant	58.386
Bass Ash-20		1387.59	7.87902	1113.07	8.93043	1839.22	10.2697		discordant	60.5188
Bass Ash-44		1231.72	13.8344	1118.74	17.1021	1435.26	18.9392		discordant	77.9466
Bass Ash-39		1441.66	9.96569	1201.04	12.3385	1817.01	11.5885		discordant	66.0997
Bass Ash-12		1379.5	26.0261	1213.4	26.0345	1646.78	46.7633		discordant	73.6829
Bass Ash-88		1511.74	10.4145	1299.45	13.4125	1823.23	12.2412		discordant	71.272
Bass Ash-53		1618.18	8.23562	1312.15	10.6944	2042.86	8.37591		discordant	64.2308
Bass Ash-38		1523.94	8.40176	1330.65	11.244	1803.71	9.26009		discordant	73.7729
Bass Ash-28		1560.62	7.83291	1350.82	10.5	1857.34	8.53757		discordant	72.7289
Bass Ash-71		1566.11	9.47081	1373.75	12.9088	1836.02	10.2333		discordant	74.8221
Bass Ash-89		1566.09	9.94818	1402.12	13.5017	1794.72	11.5892		discordant	78.1244
Bass Ash-1		1586.24	11.9802	1415.63	15.8582	1821.07	14.8717		discordant	77.7364
Bass Ash-20B		1573.17	11.8498	1453.83	16.7591	1737.13	13.4402		discordant	83.6914
Bass Ash-27		1614.38	17.2026	1534.54	25.1087	1720.12	19.6856		discordant	89.2114
Bass Ash-40		1714.54	12.6636	1568.18	19.0847	1898.27	12.1996		discordant	82.6111
Bass Ash-81		1668.18	7.66846	1582.82	11.5696	1777.33	8.09843		discordant	89.0562
Bass Ash-82		1709.47	11.2758	1623.73	16.0296	1816.19	14.2101		discordant	89.4032
Bass Ash-56		1678.9	12.2503	1625.43	18.6186	1746.38	13.5412		discordant	93.0742
Bass Ash-63		1708.48	10.5766	1635.48	16.4879	1799.16	10.5187		discordant	90.9026
Bass Ash-74		1706.05	16.6228	1650.05	25.4491	1775.5	18.1708		discordant	92.9343
Bass Ash-43		2334.93	11.5824	2144.96	21.1995	2505.37	8.53677		discordant	85.6145
Bass Ash-4B		2403.22	14.1903	2211.64	27.0014	2569.78	9.12495		discordant	86.0636
Bass Ash-8A		2440.78	8.5805	2365.21	16.8192	2504.37	6.3264		discordant	94.4434
Bass Ash-4A		2518.17	8.89184	2431.96	17.9576	2588.39	5.95872		discordant	93.9566
Bass Ash-59		3186.46	9.85357	3037.65	23.5385	3281.54	4.56761		discordant	92.5677
K03Bass
DB104-20		569.199	8.15397	569.357	5.44938	568.546	34.43		concordant	100.143		569.357	5.44938
DB104-45		1003.47	13.5947	996.807	17.1869	1018.04	21.0958		concordant	97.914		996.807	17.1869
DB104-94		1120.88	23.6786	1084.49	21.3361	1192.11	54.4131		concordant	90.9724		1084.49	21.3361
DB104-33		1100.24	31.5601	1106.61	27.7363	1087.65	76.6471		concordant	101.743		1106.61	27.7363
DB104-38		1128.81	27.2962	1106.81	37.0686	1171.37	32.8781		concordant	94.4884		1106.81	37.0686
DB104-99		1167.34	13.8851	1152.66	13.671	1194.66	30.1002		concordant	96.4846		1152.66	13.671
DB104-60		1167.19	11.4059	1155.97	13.365	1188.06	20.7888		concordant	97.299		1155.97	13.365
DB104-26		1190.81	23.1543	1167.32	33.1865	1233.7	21.8659		concordant	94.619		1167.32	33.1865
DB104-93		1191.01	13.0026	1200.45	17.0986	1173.91	19.8039		concordant	102.261		1200.45	17.0986
DB104-34		1191.85	13.0295	1200.66	17.1426	1175.9	19.7972		concordant	102.105		1200.66	17.1426
DB104-51		1199.53	11.6949	1200.73	14.527	1197.35	19.7456		concordant	100.283		1200.73	14.527
DB104-72		1186.29	32.4542	1202.83	46.7801	1156.25	36.1719		concordant	104.029		1202.83	46.7801
DB104-95		1237.2	17.7754	1205.68	25.004	1292.52	19.5179		concordant	93.2809		1205.68	25.004
DB104-15		1257.8	17.8959	1215.23	16.6122	1331.37	38.2473		concordant	91.2766		1215.23	16.6122
DB104-82		1247.16	30.4471	1217.95	44.9484	1297.93	24.3169		concordant	93.838		1217.95	44.9484
DB104-22		1247.94	16.4764	1231.77	20.5032	1275.95	26.9967		concordant	96.5372		1231.77	20.5032
DB104-1		1200.83	23.2486	1235.08	27.0741	1139.73	44.8885		concordant	108.366		1235.08	27.0741
DB104-68		1346.22	22.1188	1242.63	28.3233	1514.87	29.9252		concordant	82.0289		1242.63	28.3233
DB104-75		1310.48	24.5308	1250.7	28.8452	1409.68	41.3452		concordant	88.7225		1250.7	28.8452
DB104-7		1312.5	45.4242	1252.34	44.2166	1412.16	91.5837		concordant	88.6823		1252.34	44.2166
DB104-44		1339.82	34.1805	1273.62	51.7231	1447.18	19.6126		concordant	88.0074		1273.62	51.7231
DB104-52		1294.89	12.7939	1301.86	12.4824	1283.34	27.1032		concordant	101.443		1301.86	12.4824
DB104-92		1420.31	59.5839	1324.07	85.8502	1567.68	56.6525		concordant	84.4605		1324.07	85.8502
DB104-53		1361.27	37.251	1326.68	50.4601	1416	50.4544		concordant	93.6923		1326.68	50.4601
DB104-5		1353.05	14.903	1330.94	20.7239	1388.16	19.2365		concordant	95.8779		1330.94	20.7239
DB104-62		1341.12	27.4922	1340.04	39.8311	1342.83	32.312		concordant	99.7925		1340.04	39.8311
DB104-29		1367.69	18.2004	1356.92	21.4618	1384.54	32.083		concordant	98.0054		1356.92	21.4618
DB104-25		1352.84	16.6477	1360.54	23.8406	1340.68	21.006		concordant	101.482		1360.54	23.8406
DB104-16		1372.17	14.4905	1369.95	18.1293	1375.62	23.9372		concordant	99.5873		1369.95	18.1293
DB104-32		1424.88	19.2055	1374.01	28.17	1501.71	19.8764		concordant	91.4963		1374.01	28.17
DB104-3		1413.46	13.1207	1380.71	17.3584	1463.15	19.0603		concordant	94.3657		1380.71	17.3584
DB104-57		1379.12	13.0616	1383.96	12.8096	1371.62	26.8006		concordant	100.9		1383.96	12.8096
DB104-70		1401.04	15.9027	1386.19	22.6236	1423.7	19.9359		concordant	97.3651		1386.19	22.6236
DB104-87		1402.81	24.7122	1386.6	31.6986	1427.52	38.6847		concordant	97.1334		1386.6	31.6986
DB104-6		1344.96	21.226	1387.79	15.4983	1277.45	49.9651		concordant	108.638		1387.79	15.4983
DB104-76		1426.81	21.0697	1404.51	32.3117	1460.22	19.0381		concordant	96.1844		1404.51	32.3117
DB104-100		1429.83	26.3086	1412.06	41.5788	1456.36	19.1027		concordant	96.9583		1412.06	41.5788
DB104-89		1456.84	48.5782	1414.64	71.7023	1518.91	51.7062		concordant	93.1355		1414.64	71.7023
DB104-37		1408.29	55.4418	1414.89	87.3409	1398.29	45.4149		concordant	101.187		1414.89	87.3409
DB104-2		1453.79	29.9033	1429.46	13.3463	1489.52	70.5619		concordant	95.9676		1429.46	13.3463
DB104-98		1429.84	27.9622	1433.84	40.4354	1423.89	35.1773		concordant	100.699		1433.84	40.4354
DB104-55		1457.5	17.336	1444.26	23.872	1476.83	24.1067		concordant	97.7947		1444.26	23.872
DB104-56		1431.56	43.6176	1444.96	69.337	1411.69	36.1695		concordant	102.357		1444.96	69.337
DB104-61		1488.69	15.8233	1516.02	23.7955	1449.95	19.0496		concordant	104.556		1449.95	19.0496
DB104-88		1447.14	41.9765	1450.47	69.4451	1442.24	19.1165		concordant	100.571		1450.47	69.4451
DB104-43		1465.58	17.1436	1455.98	25.6801	1479.48	18.9754		concordant	98.4116		1455.98	25.6801
DB104-17		1451.24	25.2147	1458.81	40.5431	1440.14	19.1916		concordant	101.297		1458.81	40.5431
DB104-97		1471.54	22.0029	1463.34	34.1276	1483.37	20.9333		concordant	98.6498		1463.34	34.1276
DB104-8		1415.24	25.4478	1465.05	39.7728	1341.02	26.6049		concordant	109.249		1465.05	39.7728
DB104-41		1503.7	14.1669	1528.81	17.5724	1468.48	23.9747		concordant	104.109		1468.48	23.9747
DB104-36		1466.85	25.0405	1473.78	39.3527	1456.82	23.2027		concordant	101.164		1473.78	39.3527
DB104-69		1561.63	18.5285	1477.43	27.4152	1677.41	19.2761		concordant	88.0778		1477.43	27.4152
DB104-83		1483.65	15.552	1480.69	14.5839	1487.86	31.4695		concordant	99.5178		1480.69	14.5839
DB104-80		1483.75	11.0413	1487.18	13.281	1478.83	18.9991		concordant	100.564		1487.18	13.281
DB104-30		1466.8	17.4682	1487.59	23.8474	1436.81	25.9		concordant	103.534		1487.59	23.8474
DB104-79		1476.02	19.5798	1491.01	30.1086	1454.52	20.9695		concordant	102.509		1491.01	30.1086
DB104-9		1555.76	29.7659	1603.08	50.8498	1492.06	20.2099		concordant	107.441		1492.06	20.2099
DB104-4		1656.59	48.383	1773.38	82.2777	1511.5	49.5234		concordant	117.326		1511.5	49.5234
DB104-66		1517.57	35.013	1519.44	32.9568	1514.95	70.1711		concordant	100.297		1514.95	70.1711
DB104-77		1521.05	29.6818	1506.92	41.0076	1540.76	41.4362		concordant	97.804		1540.76	41.4362
DB104-11		1257.24	30.799	1092.62	38.9815	1551.25	33.5536		discordant	70.4345		1551.25	33.5536
DB104-40		1578.48	16.9276	1582.84	14.0349	1572.65	34.8723		concordant	100.648		1572.65	34.8723
DB104-18		1564.86	15.1924	1548.83	16.6092	1586.55	27.5291		concordant	97.6226		1586.55	27.5291
DB104-54		1606.47	27.9807	1616.11	39.1006	1593.84	39.8083		concordant	101.397		1593.84	39.8083
DB104-74		1628.23	26.2209	1640.28	44.3826	1612.67	19.1282		concordant	101.713		1612.67	19.1282
DB104-12		1547.92	40.2529	1500.09	58.2186	1613.84	48.3373		concordant	92.9519		1613.84	48.3373
DB104-86		1598.91	27.7712	1584.93	43.0399	1617.35	29.497		concordant	97.9956		1617.35	29.497
DB104-81		1620.83	35.8404	1618.41	44.5585	1623.97	58.5085		concordant	99.6577		1623.97	58.5085
DB104-47		1662.11	33.1638	1686.44	48.3941	1631.5	44.7507		concordant	103.368		1631.5	44.7507
DB104-48		1665.23	20.5758	1688.96	34.2383	1635.43	18.6585		concordant	103.273		1635.43	18.6585
DB104-27		1678.07	36.9965	1699.74	37.1365	1651.06	69.6712		concordant	102.948		1651.06	69.6712
DB104-21		1656.36	17.0206	1651.33	22.5675	1662.73	25.8009		concordant	99.3146		1662.73	25.8009
DB104-31		1697.72	50.3536	1716.54	90.6261	1674.55	19.0817		concordant	102.507		1674.55	19.0817
DB104-14		1675.3	16.5189	1670.99	20.5369	1680.67	26.8103		concordant	99.4242		1680.67	26.8103
DB104-64		1668.22	43.0784	1654.47	71.6788	1685.55	34.5594		concordant	98.1563		1685.55	34.5594
DB104-71		1739.16	18.1523	1758.08	27.2687	1716.46	23.3689		concordant	102.425		1716.46	23.3689
DB104-65		1507.94	19.7737	1347.14	24.0887	1741.71	28.4543		discordant	77.3461		1741.71	28.4543
DB104-42		1751.98	12.8468	1751.84	17.9424	1752.13	18.3164		concordant	99.9832		1752.13	18.3164
DB104-96		1706.36	15.0019	1653.94	22.0364	1771.31	18.3893		discordant	93.3742		1771.31	18.3893
DB104-19		1799.61	16.0939	1818.93	24.1377	1777.29	21.0088		concordant	102.342		1777.29	21.0088
DB104-39		1668.53	60.2249	1554.93	80.9856	1814.56	80.4105		concordant	85.6918		1814.56	80.4105
DB104-91		1821.33	31.4921	1768.84	50.5791	1881.88	31.9289		concordant	93.9931		1881.88	31.9289
DB104-63		2422.94	16.3065	2302.4	28.209	2525.78	16.8276		discordant	91.1561		2525.78	16.8276
DB104-84		2565.36	30.3368	2542.69	64.8949	2583.31	16.6954		concordant	98.4278		2583.31	16.6954
DB104-73		2588.11	22.6896	2487.14	45.5161	2668.12	16.6391		discordant	93.2171		2668.12	16.6391
DB104-50		2576.22	30.2939	2445.19	62.6514	2680.97	16.6347		discordant	91.2053		2680.97	16.6347
DB104-49		2624.47	22.7613	2549.14	46.4752	2683.09	16.5738		concordant	95.0077		2683.09	16.5738
DB104-67		2684.46	24.6761	2683.52	53.0492	2685.15	16.5479		concordant	99.9393		2685.15	16.5479
DB104-28		2687.26	13.8627	2681.99	23.5898	2691.23	16.552		concordant	99.6565		2691.23	16.552
DB104-90		2652.75	41.14	2590.57	90.7475	2700.52	16.5379		concordant	95.9288		2700.52	16.5379
DB104-24		2817.63	73.7621	2732.19	170.82	2879.35	16.3011		concordant	94.889		2879.35	16.3011
K03BASS1-1
		1015.57	57.2148	973.055	12.943	1108.38	90.6507		concordant	87.7905		973.055	12.943
		1061.73	71.1003	987.229	41.9994	1218.21	100.459		concordant	81.0396		987.229	41.9994
		1069.37	29.5089	1024.88	34.5895	1161.23	26.4374		concordant	88.2582		1024.88	34.5895
		1146.08	70.515	1074.18	30.2048	1284.79	99.3809		concordant	83.6071		1074.18	30.2048
		1111.86	65.28	1100.89	62.9686	1133.35	77.5137		concordant	97.1363		1100.89	62.9686
		1140.79	66.3715	1101.88	87.1249	1215.55	49.3875		concordant	90.6485		1101.88	87.1249
		1149.96	41.1397	1123.08	22.8806	1200.99	56.0303		concordant	93.5129		1123.08	22.8806
		1118.07	47.7914	1127.44	45.7159	1099.87	57.0269		concordant	102.506		1127.44	45.7159
		1170.23	59.5685	1135.32	36.5205	1235.4	79.5643		concordant	91.8993		1135.32	36.5205
		1195.45	69.8017	1153.74	17.5503	1271.64	99.2689		concordant	90.7283		1153.74	17.5503
		1166.04	65.621	1164.71	13.6323	1168.51	96.1946		concordant	99.6741		1164.71	13.6323
		1163.52	42.5568	1168.67	18.5298	1153.94	59.8954		concordant	101.276		1168.67	18.5298
		1222.39	41.5267	1175.86	52.8962	1305.44	32.4295		concordant	90.0742		1175.86	52.8962
		1184.58	30.5439	1183.27	28.732	1186.95	35.0263		concordant	99.69		1183.27	28.732
		1222.94	87.0405	1189.36	35.0247	1282.67	120.927		concordant	92.7251		1189.36	35.0247
		1296.04	41.6911	1189.87	35.5476	1476.46	45.5416		concordant	80.5894		1189.87	35.5476
		1266.71	98.8577	1195.54	41.154	1389.64	133.43		concordant	86.032		1195.54	41.154
		1183.8	56.5273	1201.56	48.2023	1151.46	70.0602		concordant	104.351		1201.56	48.2023
		1210.25	42.9651	1205.25	31.1066	1219.15	54.3067		concordant	98.86		1205.25	31.1066
		1242.74	58.0942	1209.85	23.931	1300.17	78.3724		concordant	93.0532		1209.85	23.931
		1257.09	33.0068	1210.33	23.9143	1338.03	39.7966		concordant	90.4562		1210.33	23.9143
		1234.58	58.6901	1220.74	20.9252	1258.81	80.7189		concordant	96.9754		1220.74	20.9252
		1230.19	58.7134	1228.02	40.8723	1233.98	75.0691		concordant	99.517		1228.02	40.8723
		1209.82	81.1959	1237.65	36.2664	1160.49	114.501		concordant	106.649		1237.65	36.2664
		1265.9	30.474	1252.31	30.5524	1289.04	32.3478		concordant	97.1507		1252.31	30.5524
		1258.02	41.6649	1253.24	39.7587	1266.18	46.351		concordant	98.9779		1253.24	39.7587
		1311.71	52.5222	1256.33	44.6349	1403.4	59.2452		concordant	89.5211		1256.33	44.6349
		1311.32	55.755	1257.3	43.7723	1400.75	64.925		concordant	89.7594		1257.3	43.7723
		1224.16	67.6644	1273.05	53.0915	1139	86.558		concordant	111.769		1273.05	53.0915
		1329.27	47.8004	1290.51	68.3139	1392.26	28.9824		concordant	92.6912		1290.51	68.3139
		1418.08	24.8877	1349.97	21.0888	1521.91	26.4375		concordant	88.7024		1349.97	21.0888
		1419.46	56.1304	1360.22	49.7822	1509.46	60.058		concordant	90.1128		1360.22	49.7822
		1563.5	92.7107	1439.86	154.403	1734.71	11.0552		concordant	83.0027		1439.86	154.403
		1472.44	17.0871	1454.76	21.2031	1498	14.2037		concordant	97.1139		1454.76	21.2031
		1569.85	118.291	1478.85	186.803	1694.43	58.9516		concordant	87.2774		1478.85	186.803
		1594.49	42.3343	1488.29	59.8339	1737.84	26.6296		concordant	85.6402		1488.29	59.8339
		1686.95	62.8002	1752.24	22.0203	1606.7	72.2884		concordant	109.058		1606.7	72.2884
		1554.74	62.5781	1503.54	81.6147	1625	49.4907		concordant	92.5258		1625	49.4907
		1670.66	43.8624	1697.16	72.7053	1637.51	22.5701		concordant	103.643		1637.51	22.5701
		1628.89	81.1939	1620.9	143.432	1639.21	23.026		concordant	98.883		1639.21	23.026
		1701.73	29.2553	1748.49	37.887	1644.6	24.1476		concordant	106.317		1644.6	24.1476
		1617.71	50.4765	1571.21	43.484	1678.75	51.5731		concordant	93.594		1678.75	51.5731
		1662.51	48.0095	1637.91	54.0525	1693.7	43.3068		concordant	96.7059		1693.7	43.3068
		1605.72	15.721	1539.15	19.5533	1694.15	12.4128		discordant	90.8509		1694.15	12.4128
		1687.82	30.175	1675.27	43.9636	1703.43	20.4169		concordant	98.3469		1703.43	20.4169
		1593.6	30.3225	1507.34	27.4107	1709.63	29.7875		discordant	88.1676		1709.63	29.7875
		1684.38	48.6919	1658.81	61.7285	1716.35	39.9014		concordant	96.6475		1716.35	39.9014
		1752.99	30.259	1783.44	50.5962	1716.87	15.6786		concordant	103.877		1716.87	15.6786
		1781.22	40.334	1833.27	32.2128	1720.75	41.0183		concordant	106.539		1720.75	41.0183
		1703.52	49.2142	1679.94	56.5458	1732.63	43.5812		concordant	96.9584		1732.63	43.5812
		1642.12	37.39	1570.14	37.6665	1735.52	34.9914		concordant	90.4712		1735.52	34.9914
		1689.28	33.505	1649.87	49.181	1738.52	21.7479		concordant	94.9009		1738.52	21.7479
		1698.14	44.1267	1656.49	78.2638	1749.91	8.44072		concordant	94.6618		1749.91	8.44072
		1755.14	33.3086	1755.23	29.9091	1755.02	32.5228		concordant	100.012		1755.02	32.5228
		1767.55	35.0317	1776.5	45.646	1756.98	28.0728		concordant	101.111		1756.98	28.0728
		1810.18	47.8936	1853.32	66.6673	1760.84	37.036		concordant	105.252		1760.84	37.036
		1644.95	25.9869	1554.06	26.3459	1763.09	23.8177		discordant	88.1443		1763.09	23.8177
		1706.88	32.9201	1655.81	57.2876	1770.14	8.502		concordant	93.5412		1770.14	8.502
		1789.82	28.4328	1796.25	42.5043	1782.33	19.0184		concordant	100.781		1782.33	19.0184
		1738.94	34.3245	1693.35	51.3371	1794.2	21.5819		concordant	94.3787		1794.2	21.5819
		1690.06	40.3322	1574.22	64.9031	1836.91	16.1263		discordant	85.6993		1836.91	16.1263
		2336.65	62.7221	2242.94	113.313	2419.5	31.4467		concordant	92.7026		2419.5	31.4467
		2698.52	41.4867	2687.33	74.7567	2706.9	23.9279		concordant	99.277		2706.9	23.9279
		2643.82	29.3248	2556.74	57.5912	2711.16	13.0407		concordant	94.3042		2711.16	13.0407
K05771
K05771-13		1075.34	21.6027	1083.4	5.78806	1059.02	64.5135		concordant	102.301		1083.4	5.78806
K05771-9		1163.4	17.0342	1085.92	22.4221	1310.65	19.5564		concordant	82.8539		1085.92	22.4221
K05771-35		1248.45	25.1344	1157.67	23.3012	1408.61	52.0771		concordant	82.1854		1157.67	23.3012
K05771-64		1218.05	14.6093	1168.46	7.79475	1306.99	37.3895		concordant	89.4009		1168.46	7.79475
K05771-41		1194.75	14.4959	1173.38	7.93395	1233.6	37.804		concordant	95.1182		1173.38	7.93395
K05771-45		1216.97	45.7801	1174.79	17.9107	1292.54	121.362		concordant	90.8905		1174.79	17.9107
K05771-29		1215.87	18.8681	1176.1	19.2571	1287.15	38.3338		concordant	91.3729		1176.1	19.2571
K05771-47		1203.84	26.7364	1180.59	33.5936	1245.77	42.3433		concordant	94.7677		1180.59	33.5936
K05771-93		1228.91	17.679	1182.41	11.8302	1311.42	43.185		concordant	90.1626		1182.41	11.8302
K05771-23		1224.45	11.1875	1194.48	12.1304	1277.63	21.6708		concordant	93.4919		1194.48	12.1304
K05771-69		1223.37	15.0072	1227.11	15.3381	1216.76	31.5298		concordant	100.85		1227.11	15.3381
K05771-76		1242.98	12.3464	1240.66	13.36	1246.97	24.4951		concordant	99.4941		1240.66	13.36
K05771-38		1271.63	27.0595	1248.81	39.2302	1310.39	27.2894		concordant	95.3008		1248.81	39.2302
K05771-27		1248.62	12.1421	1248.88	8.80752	1248.15	29.394		concordant	100.058		1248.88	8.80752
K05771-28		1387.86	19.5921	1304.89	28.0205	1517.81	19.5881		concordant	85.9722		1304.89	28.0205
K05771-55		1406.95	42.6119	1323.67	63.6172	1535.44	32.7288		concordant	86.2075		1323.67	63.6172
K05771-42		1455.23	24.7191	1345.15	34.7038	1619.83	26.6303		concordant	83.0424		1345.15	34.7038
K05771-24		1432.01	15.191	1353.07	20.7737	1551.33	18.96		concordant	87.2198		1353.07	20.7737
K05771-63		1428.18	12.2908	1370.37	15.4172	1515.4	18.9673		concordant	90.4293		1370.37	15.4172
K05771-50		1563.25	44.6699	1384.63	68.5953	1813.62	18.3492		concordant	76.3458		1384.63	68.5953
K05771-68		1447.52	15.6375	1412.02	22.3522	1500.02	18.9318		concordant	94.1335		1412.02	22.3522
K05771-71		1435.3	14.6569	1420.29	20.6811	1457.6	19.0733		concordant	97.4407		1420.29	20.6811
K05771-5		1450.28	42.9573	1431.51	68.3473	1477.89	30.4722		concordant	96.8615		1431.51	68.3473
K05771-53		1433.65	13.1967	1447.53	12.8934	1413.1	26.808		concordant	102.437		1447.53	12.8934
K05771-36		1581.97	21.0596	1452.08	31.5772	1759.74	18.2999		concordant	82.5169		1452.08	31.5772
K05771-94		1577.86	20.2686	1487.62	30.8586	1700.68	18.5115		concordant	87.4716		1487.62	30.8586
K05771-46		1639.83	15.9398	1660.66	20.0388	1613.21	26.1189		concordant	102.941		1613.21	26.1189
K05771-66		1639.02	23.2585	1604.62	19.1342	1683.42	46.5694		concordant	95.3195		1683.42	46.5694
K05771-10		1604.07	23.0139	1544.03	35.4501	1683.82	22.4603		concordant	91.6982		1683.82	22.4603
K05771-15		1683	16.1278	1672.34	24.8617	1696.3	18.4465		concordant	98.5877		1696.3	18.4465
K05771-97		1652.29	14.7001	1610.49	21.3537	1705.86	18.4125		concordant	94.4092		1705.86	18.4125
K05771-50		1710.34	32.2937	1713.91	31.3122	1705.95	60.8189		concordant	100.466		1705.95	60.8189
K05771-72		1748.19	12.301	1770.39	15.2088	1721.72	20.2151		concordant	102.827		1721.72	20.2151
K05771-59		1744.9	15.1863	1762.33	17.9439	1724.06	25.758		concordant	102.22		1724.06	25.758
K05771-100		1696.54	11.7922	1670.13	11.3316	1729.31	22.1225		concordant	96.5777		1729.31	22.1225
K05771-58		1755.34	12.6192	1771.49	17.5243	1736.16	18.365		concordant	102.035		1736.16	18.365
K05771-33		1735.01	16.502	1733.01	15.4946	1737.41	31.2179		concordant	99.7469		1737.41	31.2179
K05771-12		1727.98	9.47149	1718.56	8.27894	1739.39	18.3329		concordant	98.8023		1739.39	18.3329
K05771-57		1739.6	13.4993	1738.67	19.3924	1740.69	18.4271		concordant	99.8839		1740.69	18.4271
K05771-4		1747.4	12.476	1751.61	17.0647	1742.35	18.3348		concordant	100.532		1742.35	18.3348
K05771-67		1773.49	28.8197	1798.37	51.598	1744.31	18.3318		concordant	103.099		1744.31	18.3318
K05771-18		1753.34	13.007	1760.06	18.3934	1745.31	18.3298		concordant	100.846		1745.31	18.3298
K05771-82		1681.81	23.8693	1628.76	39.2215	1748.63	18.4114		concordant	93.1451		1748.63	18.4114
K05771-62		1756.94	10.9874	1763.77	13.1691	1748.81	18.3203		concordant	100.855		1748.81	18.3203
K05771-19		1758.42	9.07071	1764.5	6.48639	1751.19	18.3202		concordant	100.76		1751.19	18.3202
K05771-3		1753.98	11.6716	1756.04	14.9983	1751.51	18.3253		concordant	100.259		1751.51	18.3253
K05771-56		1742.68	11.5504	1732.93	14.5725	1754.38	18.3301		concordant	98.7776		1754.38	18.3301
K05771-16		1755.23	9.17633	1755.54	6.97853	1754.84	18.3081		concordant	100.04		1754.84	18.3081
K05771-25		1725.51	17.717	1701.26	28.1948	1755.04	18.3219		concordant	96.9357		1755.04	18.3219
K05771-70		1761.29	12.6082	1765.86	17.4244	1755.85	18.2998		concordant	100.57		1755.85	18.2998
K05771-74		1718.34	16.7584	1687.6	24.976	1755.98	20.5473		concordant	96.1061		1755.98	20.5473
K05771-95		1740.81	10.6568	1728.14	12.1059	1756.04	18.2978		concordant	98.4116		1756.04	18.2978
K05771-1		1770.96	10.2485	1782.73	10.949	1757.1	18.3058		concordant	101.458		1757.1	18.3058
K05771-96		1719.76	19.2324	1688.52	31.0824	1757.99	18.3468		concordant	96.0481		1757.99	18.3468
K05771-61		1756.32	12.5687	1754.28	17.2568	1758.74	18.298		concordant	99.746		1758.74	18.298
K05771-91		1747.76	11.6213	1734.88	14.7625	1763.2	18.2807		concordant	98.3935		1763.2	18.2807
K05771-6		1760.56	11.0989	1758.15	13.4298	1763.39	18.2798		concordant	99.7029		1763.39	18.2798
K05771-98		1760.49	12.2245	1757.22	16.3853	1764.37	18.2994		concordant	99.5947		1764.37	18.2994
K05771-11		1704.65	20.7024	1654.52	33.523	1766.83	18.3035		concordant	93.6434		1766.83	18.3035
K05771-31		1740.41	10.5187	1715.16	11.5101	1770.88	18.3704		concordant	96.8536		1770.88	18.3704
K05771-92		1692.64	36.9849	1630.12	61.3608	1770.96	25.8039		concordant	92.047		1770.96	25.8039
K05771-30		1748.05	11.2052	1727.93	13.5902	1772.18	18.2717		concordant	97.5034		1772.18	18.2717
K05771-99		1616.98	31.841	1499.7	50.9031	1773.21	18.3879		concordant	84.5754		1773.21	18.3879
K05771-14		1737.89	9.60527	1708.59	8.64634	1773.32	18.2608		concordant	96.35		1773.32	18.2608
K05771-73		1763.43	11.1772	1754.42	13.597	1774.11	18.2629		concordant	98.8898		1774.11	18.2629
K05771-51		1746.84	30.2506	1717.82	52.5809	1781.74	18.26		concordant	96.4127		1781.74	18.26
K05771-2		1756.96	11.0355	1727.68	12.8607	1791.94	18.4343		concordant	96.414		1791.94	18.4343
K05771-84		1233.33	21.2148	1074.28	26.6493	1523.15	23.6423		discordant	70.5301
K05771-79		1266.76	25.7138	1110.38	34.7528	1543.03	18.8835		discordant	71.961
K05771-65		1387.49	23.8709	1243.03	32.391	1617.18	24.5998		discordant	76.8641
K05771-43		1531.82	34.978	1313.11	51.1348	1848.43	18.3055		discordant	71.0389
K05771-39		1529.64	28.9619	1314.99	41.5386	1840.56	20.0744		discordant	71.4449
K05771-37		1485.7	20.6401	1331.15	29.4155	1713.84	18.5056		discordant	77.6708
K05771-89		1574.04	26.3533	1361.85	38.4679	1871.4	18.3067		discordant	72.7721
K05771-34		1571.5	21.61	1383.94	31.2648	1833.38	18.1603		discordant	75.4855
K05771-17		1580.9	11.9476	1410.29	13.6469	1816.62	18.7097		discordant	77.6328
K05771-78		1611.14	17.888	1500.23	26.2599	1759.28	18.7838		discordant	85.2751
K05771-54		1574.81	14.9013	1524.34	12.8814	1643.1	29.7386		discordant	92.7718
K05771-60		1657	25.0039	1554.75	39.9229	1789.16	18.3587		discordant	86.8986
K05771-40		1686.58	12.6677	1556.07	16.0302	1852.9	18.3211		discordant	83.9806
K05771-8		1663.94	23.0601	1563.46	36.5712	1793.16	18.2318		discordant	87.1903
K05771-26		1674.41	31.0508	1568.07	47.1629	1810.38	30.6406		discordant	86.6159
K05771-48		1673.04	33.7966	1586.79	56.2107	1782.99	18.3048		discordant	88.9958
K05771-21		1680.81	21.55	1587.96	31.1777	1798.71	25.5648		discordant	88.2834
K05771-80		1666.41	17.9216	1591.22	27.3982	1762.47	18.4232		discordant	90.2836
K05771-77		1669.59	11.7472	1611.13	14.1168	1743.87	18.997		discordant	92.3883
K05771-88		1675.44	17.1801	1611.44	26.1891	1756.54	18.3899		discordant	91.7392
K05771-83		1678.81	12.7407	1618.14	16.9495	1755.47	18.3419		discordant	92.1768
K05771-32		1751.16	15.317	1679.16	22.7272	1838.18	18.1627		discordant	91.349
K05771-85		2636.42	21.4008	2514.66	42.4682	2731.25	16.6737		discordant	92.0697
JM16-77-2
Karlstrom-JM16-77-2-take2-29June2016-Spot 87		1233.04	14.9345	1230.72	21.6869	1237.13	15.5458		concordant	99.4812		1230.72	21.6869
Karlstrom-JM16-77-2-take2-29June2016-Spot 42		1235.34	17.7299	1232.57	26.6508	1240.2	14.0194		concordant	99.3849		1232.57	26.6508
Karlstrom-JM16-77-2-take2-29June2016-Spot 71		1236.22	18.2987	1235.81	27.7598	1236.95	13.2826		concordant	99.9078		1235.81	27.7598
Karlstrom-JM16-77-2-take2-29June2016-Spot 16		1242.73	14.8415	1242.91	22.4339	1242.44	11.5455		concordant	100.038		1242.91	22.4339
Karlstrom-JM16-77-2-take2-29June2016-Spot 26		1234.44	12.3565	1244.51	18.6219	1216.88	10.4716		concordant	102.271		1244.51	18.6219
Karlstrom-JM16-77-2-take2-29June2016-Spot 56		1237.25	16.0677	1244.83	24.8579	1224.06	9.33615		concordant	101.697		1244.83	24.8579
Karlstrom-JM16-77-2-take2-29June2016-Spot 64		1240.95	17.5605	1246.53	26.8128	1231.28	12.6191		concordant	101.238		1246.53	26.8128
Karlstrom-JM16-77-2-take2-29June2016-Spot 45		1243.48	20.681	1249.11	31.9234	1233.76	12.6285		concordant	101.245		1249.11	31.9234
Karlstrom-JM16-77-2-take2-29June2016-Spot 27		1244.13	13.3593	1249.23	20.0924	1235.34	11.4395		concordant	101.125		1249.23	20.0924
Karlstrom-JM16-77-2-take2-29June2016-Spot 109		1242.5	14.8074	1249.85	22.1825	1229.8	13.2532		concordant	101.63		1249.85	22.1825
Karlstrom-JM16-77-2-take2-29June2016-Spot 60		1245.37	13.7197	1252.67	20.0421	1232.79	14.6381		concordant	101.612		1252.67	20.0421
Karlstrom-JM16-77-2-take2-29June2016-Spot 52		1247.79	13.2243	1252.96	19.2081	1238.87	14.4586		concordant	101.137		1252.96	19.2081
Karlstrom-JM16-77-2-take2-29June2016-Spot 91		1242.77	17.521	1253.51	26.4746	1224.17	14.8709		concordant	102.397		1253.51	26.4746
Karlstrom-JM16-77-2-take2-29June2016-Spot 13		1240.48	16.5935	1254.15	25.3353	1216.81	12.8619		concordant	103.068		1254.15	25.3353
Karlstrom-JM16-77-2-take2-29June2016-Spot 22		1246.9	16.1928	1254.41	24.5696	1233.97	12.9938		concordant	101.656		1254.41	24.5696
Karlstrom-JM16-77-2-take2-29June2016-Spot 68		1242.65	16.0746	1254.78	24.5386	1221.68	12.3969		concordant	102.709		1254.78	24.5386
Karlstrom-JM16-77-2-take2-29June2016-Spot 20		1244.23	20.3187	1255.5	30.5237	1224.74	18.2489		concordant	102.512		1255.5	30.5237
Karlstrom-JM16-77-2-take2-29June2016-Spot 5		1247.21	17.1322	1257.23	26.1059	1229.98	13.4187		concordant	102.215		1257.23	26.1059
Karlstrom-JM16-77-2-take2-29June2016-Spot 107		1245.23	12.7534	1257.67	18.9519	1223.77	12.5627		concordant	102.77		1257.67	18.9519
Karlstrom-JM16-77-2-take2-29June2016-Spot 23		1237.18	18.1441	1257.92	28.0327	1201.22	12.7354		concordant	104.72		1257.92	28.0327
Karlstrom-JM16-77-2-take2-29June2016-Spot 62		1245.49	12.9189	1259.36	19.3594	1221.58	12.0771		concordant	103.093		1259.36	19.3594
Karlstrom-JM16-77-2-take2-29June2016-Spot 77		1245.29	14.685	1259.82	22.0935	1220.24	13.3405		concordant	103.243		1259.82	22.0935
Karlstrom-JM16-77-2-take2-29June2016-Spot 103		1250.56	17.8104	1261.5	27.3158	1231.8	13.1592		concordant	102.411		1261.5	27.3158
Karlstrom-JM16-77-2-take2-29June2016-Spot 24		1245.15	16.8074	1262.63	26.0465	1215.01	11.2457		concordant	103.919		1262.63	26.0465
Karlstrom-JM16-77-2-take2-29June2016-Spot 63		1256.09	21.2392	1263.57	32.1002	1243.3	18.1379		concordant	101.631		1263.57	32.1002
Karlstrom-JM16-77-2-take2-29June2016-Spot 12		1249.5	61.4612	1264.62	97.5865	1223.52	16.7851		concordant	103.359		1264.62	97.5865
Karlstrom-JM16-77-2-take2-29June2016-Spot 75		1253.84	14.8098	1264.66	22.6325	1235.33	11.5467		concordant	102.374		1264.66	22.6325
Karlstrom-JM16-77-2-take2-29June2016-Spot 86		1253.78	23.3506	1266.68	35.8425	1231.72	17.553		concordant	102.838		1266.68	35.8425
Karlstrom-JM16-77-2-take2-29June2016-Spot 18		1253.14	21.7544	1269.1	33.728	1225.82	14.6882		concordant	103.531		1269.1	33.728
Karlstrom-JM16-77-2-take2-29June2016-Spot 33		1269.72	20.0511	1271.14	30.1941	1267.33	17.5026		concordant	100.301		1271.14	30.1941
Karlstrom-JM16-77-2-take2-29June2016-Spot 40		1261.55	18.7557	1272.67	28.6544	1242.64	15.0186		concordant	102.416		1272.67	28.6544
Karlstrom-JM16-77-2-take2-29June2016-Spot 36		1264.58	14.3708	1272.73	21.7745	1250.74	12.2728		concordant	101.758		1272.73	21.7745
Karlstrom-JM16-77-2-take2-29June2016-Spot 80		1266.31	14.9878	1272.94	22.8823	1255.04	11.819		concordant	101.426		1272.94	22.8823
Karlstrom-JM16-77-2-take2-29June2016-Spot 83		1260.98	16.0363	1273.25	24.3487	1240.13	13.7196		concordant	102.671		1273.25	24.3487
Karlstrom-JM16-77-2-take2-29June2016-Spot 9		1260.07	23.5445	1273.33	36.7624	1237.52	14.0449		concordant	102.894		1273.33	36.7624
Karlstrom-JM16-77-2-take2-29June2016-Spot 82		1257.86	21.7238	1275.97	33.9045	1226.98	13.7813		concordant	103.993		1275.97	33.9045
Karlstrom-JM16-77-2-take2-29June2016-Spot 19		1266.42	28.4108	1276.07	43.2048	1250.04	23.8155		concordant	102.083		1276.07	43.2048
Karlstrom-JM16-77-2-take2-29June2016-Spot 67		1263.13	18.7519	1277.37	29.101	1238.95	12.7662		concordant	103.102		1277.37	29.101
Karlstrom-JM16-77-2-take2-29June2016-Spot 55		1261.46	14.5525	1282.83	22.0745	1225.17	13.2968		concordant	104.706		1282.83	22.0745
Karlstrom-JM16-77-2-take2-29June2016-Spot 31		1268.53	30.3868	1283.66	48.4152	1242.97	10.5266		concordant	103.273		1283.66	48.4152
Karlstrom-JM16-77-2-take2-29June2016-Spot 85		1289.73	17.9619	1285.74	27.6037	1296.35	12.9015		concordant	99.1815		1285.74	27.6037
Karlstrom-JM16-77-2-take2-29June2016-Spot 93		1267.09	23.5008	1285.87	36.8342	1235.38	14.5849		concordant	104.087		1285.87	36.8342
Karlstrom-JM16-77-2-take2-29June2016-Spot 4		1297.63	21.8839	1286.8	30.7707	1315.58	27.1807		concordant	97.8123		1286.8	30.7707
Karlstrom-JM16-77-2-take2-29June2016-Spot 84		1295.5	31.5503	1307.82	49.3773	1275.13	21.0972		concordant	102.564		1307.82	49.3773
Karlstrom-JM16-77-2-take2-29June2016-Spot 101		1442.55	20.1606	1410.29	31.3868	1490.42	15.9704		concordant	94.6237		1410.29	31.3868
Karlstrom-JM16-77-2-take2-29June2016-Spot 30		1448.39	15.7133	1436.1	25.1672	1466.46	10.8378		concordant	97.9298		1436.1	25.1672
Karlstrom-JM16-77-2-take2-29June2016-Spot 90		1480.67	19.1024	1509.53	31.999	1439.55	11.3742		concordant	104.861		1439.55	11.3742
Karlstrom-JM16-77-2-take2-29June2016-Spot 79		1447.63	12.4566	1440.21	19.0773	1458.54	12.3647		concordant	98.7434		1440.21	19.0773
Karlstrom-JM16-77-2-take2-29June2016-Spot 29		1446.71	13.9431	1440.59	21.8933	1455.7	11.9239		concordant	98.9614		1440.59	21.8933
Karlstrom-JM16-77-2-take2-29June2016-Spot 15		1452.5	15.7208	1441.8	24.8177	1468.17	12.7465		concordant	98.2042		1441.8	24.8177
Karlstrom-JM16-77-2-take2-29June2016-Spot 108		1444.67	18.7373	1442.12	30.6007	1448.4	10.4728		concordant	99.5663		1442.12	30.6007
Karlstrom-JM16-77-2-take2-29June2016-Spot 38		1451.11	17.5568	1445.62	27.3656	1459.16	15.9406		concordant	99.0716		1445.62	27.3656
Karlstrom-JM16-77-2-take2-29June2016-Spot 110		1440.8	11.3876	1445.73	17.698	1433.51	10.8129		concordant	100.852		1445.73	17.698
Karlstrom-JM16-77-2-take2-29June2016-Spot 50		1459.69	13.2425	1446.04	20.925	1479.59	10.6519		concordant	97.7324		1446.04	20.925
Karlstrom-JM16-77-2-take2-29June2016-Spot 57		1455.69	17.7923	1448.11	28.5677	1466.75	12.6208		concordant	98.729		1448.11	28.5677
Karlstrom-JM16-77-2-take2-29June2016-Spot 14		1443.12	17.4524	1448.55	27.9868	1435.11	13.2019		concordant	100.937		1448.55	27.9868
Karlstrom-JM16-77-2-take2-29June2016-Spot 46		1447.75	12.2979	1449.74	19.1148	1444.81	11.646		concordant	100.341		1449.74	19.1148
Karlstrom-JM16-77-2-take2-29June2016-Spot 17		1450.56	14.2635	1452.14	22.3807	1448.22	12.7703		concordant	100.271		1452.14	22.3807
Karlstrom-JM16-77-2-take2-29June2016-Spot 100		1448.67	17.592	1452.16	28.7562	1443.52	10.5368		concordant	100.599		1452.16	28.7562
Karlstrom-JM16-77-2-take2-29June2016-Spot 34		1459.94	18.5052	1452.63	29.5627	1470.57	14.003		concordant	98.7803		1452.63	29.5627
Karlstrom-JM16-77-2-take2-29June2016-Spot 48		1455.87	17.7078	1458.4	28.4663	1452.16	13.2622		concordant	100.43		1458.4	28.4663
Karlstrom-JM16-77-2-take2-29June2016-Spot 92		1453.27	17.2272	1458.46	28.1261	1445.68	10.88		concordant	100.884		1458.46	28.1261
Karlstrom-JM16-77-2-take2-29June2016-Spot 58		1456.52	14.9552	1458.52	23.6637	1453.58	12.7824		concordant	100.339		1458.52	23.6637
Karlstrom-JM16-77-2-take2-29June2016-Spot 21		1455.56	15.0621	1458.66	23.7512	1451.03	13.2326		concordant	100.526		1458.66	23.7512
Karlstrom-JM16-77-2-take2-29June2016-Spot 51		1456.23	14.9189	1458.9	23.3109	1452.31	13.888		concordant	100.454		1458.9	23.3109
Karlstrom-JM16-77-2-take2-29June2016-Spot 61		1458.28	18.8126	1459.74	30.294	1456.15	13.8414		concordant	100.246		1459.74	30.294
Karlstrom-JM16-77-2-take2-29June2016-Spot 3		1453.06	16.9897	1461.23	26.1017	1441.12	17.558		concordant	101.395		1461.23	26.1017
Karlstrom-JM16-77-2-take2-29June2016-Spot 35		1452.62	17.5846	1461.58	28.5796	1439.5	12.1169		concordant	101.534		1461.58	28.5796
Karlstrom-JM16-77-2-take2-29June2016-Spot 73		1460.31	20.6875	1465.18	33.1893	1453.22	16.1695		concordant	100.823		1465.18	33.1893
Karlstrom-JM16-77-2-take2-29June2016-Spot 106		1461.48	14.9286	1467.55	24.0255	1452.65	11.4571		concordant	101.026		1467.55	24.0255
Karlstrom-JM16-77-2-take2-29June2016-Spot 41		1454.29	16.1282	1468.78	25.8368	1433.16	13.2717		concordant	102.486		1468.78	25.8368
Karlstrom-JM16-77-2-take2-29June2016-Spot 74		1462.41	18.0921	1468.86	29.101	1453.04	14.0093		concordant	101.089		1468.86	29.101
Karlstrom-JM16-77-2-take2-29June2016-Spot 25		1456.18	13.9639	1470.42	21.388	1435.45	14.9361		concordant	102.436		1470.42	21.388
Karlstrom-JM16-77-2-take2-29June2016-Spot 43		1465.16	12.4548	1473.49	18.6939	1453.09	14.3001		concordant	101.404		1473.49	18.6939
Karlstrom-JM16-77-2-take2-29June2016-Spot 69		1459.23	19.9396	1475.3	32.8331	1435.89	12.5569		concordant	102.744		1475.3	32.8331
Karlstrom-JM16-77-2-take2-29June2016-Spot 28		1459.08	20.733	1475.53	33.6923	1435.21	15.3235		concordant	102.809		1475.53	33.6923
Karlstrom-JM16-77-2-take2-29June2016-Spot 39		1465.54	15.0763	1475.65	24.445	1450.91	11.1431		concordant	101.705		1475.65	24.445
Karlstrom-JM16-77-2-take2-29June2016-Spot 98		1465.38	21.7902	1475.75	35.9676	1450.37	12.848		concordant	101.75		1475.75	35.9676
Karlstrom-JM16-77-2-take2-29June2016-Spot 104		1466.97	15.5199	1475.81	25.6275	1454.19	9.0271		concordant	101.487		1475.81	25.6275
Karlstrom-JM16-77-2-take2-29June2016-Spot 78		1467.03	18.3885	1476.64	29.9483	1453.13	12.9747		concordant	101.618		1476.64	29.9483
Karlstrom-JM16-77-2-take2-29June2016-Spot 65		1472.1	18.8392	1478.68	30.8796	1462.6	12.2213		concordant	101.099		1478.68	30.8796
Karlstrom-JM16-77-2-take2-29June2016-Spot 10		1469.25	16.9219	1479.19	27.2237	1454.89	13.535		concordant	101.67		1479.19	27.2237
Karlstrom-JM16-77-2-take2-29June2016-Spot 47		1466.32	18.0805	1479.37	30.0413	1447.44	9.8176		concordant	102.206		1479.37	30.0413
Karlstrom-JM16-77-2-take2-29June2016-Spot 76		1469.52	13.0327	1481.52	19.9975	1452.21	13.9018		concordant	102.018		1481.52	19.9975
Karlstrom-JM16-77-2-take2-29June2016-Spot 49		1479.28	15.5387	1483.11	25.2101	1473.79	11.3699		concordant	100.632		1483.11	25.2101
Karlstrom-JM16-77-2-take2-29June2016-Spot 88		1467.18	16.5889	1483.99	26.9637	1442.92	12.5168		concordant	102.847		1483.99	26.9637
Karlstrom-JM16-77-2-take2-29June2016-Spot 66		1468.85	19.0983	1487.44	30.9378	1442.07	15.0628		concordant	103.146		1487.44	30.9378
Karlstrom-JM16-77-2-take2-29June2016-Spot 95		1471.34	15.4076	1487.89	24.0241	1447.54	15.4975		concordant	102.788		1487.89	24.0241
Karlstrom-JM16-77-2-take2-29June2016-Spot 70		1473.78	20.9263	1488.6	33.8471	1452.5	16.5584		concordant	102.486		1488.6	33.8471
Karlstrom-JM16-77-2-take2-29June2016-Spot 105		1465.27	15.3095	1488.87	25.0178	1431.21	11.3692		concordant	104.028		1488.87	25.0178
Karlstrom-JM16-77-2-take2-29June2016-Spot 99		1467.27	16.106	1494.33	26.5005	1428.31	11.4418		concordant	104.622		1494.33	26.5005
Karlstrom-JM16-77-2-take2-29June2016-Spot 94		1473.1	18.0044	1498.47	30.1189	1436.72	10.2422		concordant	104.298		1498.47	30.1189
Karlstrom-JM16-77-2-take2-29June2016-Spot 59		1474.75	18.1949	1499.32	30.0364	1439.56	12.4993		concordant	104.152		1499.32	30.0364
Karlstrom-JM16-77-2-take2-29June2016-Spot 72		1603.84	17.6385	1615.39	29.5619	1588.68	13.297		concordant	101.681		1588.68	13.297
Karlstrom-JM16-77-2-take2-29June2016-Spot 81		1696.56	12.1088	1693.57	20.6944	1700.25	8.76667		concordant	99.6075		1700.25	8.76667
Karlstrom-JM16-77-2-take2-29June2016-Spot 2		1740.44	18.5779	1743.41	32.6387	1736.86	11.794		concordant	100.377		1736.86	11.794
Karlstrom-JM16-77-2-take2-29June2016-Spot 1		1778.84	13.2254	1790.51	22.925	1765.15	10.5394		concordant	101.437		1765.15	10.5394
Karlstrom-JM16-77-2-take2-29June2016-Spot 53		1791.55	15.8987	1802.71	28.6279	1778.58	9.2176		concordant	101.357		1778.58	9.2176
JM16-77-1
Karlstrom-JM16-77-1-29June2016-Spot 25		1213.26	20.1485	1202.47	29.9536	1232.54	15.7057		concordant	97.5601		1202.47	29.9536
Karlstrom-JM16-77-1-29June2016-Spot 105		1217.37	16.3835	1204.58	23.9049	1240.12	15.2055		concordant	97.1337		1204.58	23.9049
Karlstrom-JM16-77-1-29June2016-Spot 60		1221.22	18.8273	1205.34	28.5071	1249.41	10.6868		concordant	96.4725		1205.34	28.5071
Karlstrom-JM16-77-1-29June2016-Spot 79		1228.44	19.667	1212.52	29.4321	1256.51	14.1708		concordant	96.4987		1212.52	29.4321
Karlstrom-JM16-77-1-29June2016-Spot 109		1222.98	22.2836	1216.29	33.8132	1234.82	14.099		concordant	98.499		1216.29	33.8132
Karlstrom-JM16-77-1-29June2016-Spot 23		1233.22	22.8762	1216.68	34.0195	1262.21	18.0011		concordant	96.393		1216.68	34.0195
Karlstrom-JM16-77-1-29June2016-Spot 5		1227.95	15.7883	1225.2	23.3626	1232.79	14.2531		concordant	99.3841		1225.2	23.3626
Karlstrom-JM16-77-1-29June2016-Spot 101		1249.83	32.1425	1227.71	48.715	1288.13	19.3613		concordant	95.3099		1227.71	48.715
Karlstrom-JM16-77-1-29June2016-Spot 35		1244.22	22.3236	1228.45	33.375	1271.64	17.2455		concordant	96.6036		1228.45	33.375
Karlstrom-JM16-77-1-29June2016-Spot 37		1265.14	18.1048	1231.25	25.9591	1323.22	18.3739		concordant	93.0493		1231.25	25.9591
Karlstrom-JM16-77-1-29June2016-Spot 4		1234.52	18.0517	1234.15	26.8833	1235.18	15.8846		concordant	99.9161		1234.15	26.8833
Karlstrom-JM16-77-1-29June2016-Spot 43		1245.86	25.4172	1235.98	38.0385	1262.97	20.4658		concordant	97.8627		1235.98	38.0385
Karlstrom-JM16-77-1-29June2016-Spot 78		1244.06	19.316	1238.4	29.1395	1253.86	14.6903		concordant	98.7668		1238.4	29.1395
Karlstrom-JM16-77-1-29June2016-Spot 68		1238.75	19.9397	1241.19	30.2315	1234.53	15.1046		concordant	100.539		1241.19	30.2315
Karlstrom-JM16-77-1-29June2016-Spot 53		1250.95	24.4473	1241.84	37.4709	1266.68	14.4324		concordant	98.0394		1241.84	37.4709
Karlstrom-JM16-77-1-29June2016-Spot 87		1240.27	18.5159	1244.08	28.127	1233.67	13.9432		concordant	100.844		1244.08	28.127
Karlstrom-JM16-77-1-29June2016-Spot 89		1241.99	18.7134	1246.85	28.1907	1233.6	15.6313		concordant	101.074		1246.85	28.1907
Karlstrom-JM16-77-1-29June2016-Spot 93		1247.19	27.4945	1247.82	42.019	1246.12	18.9436		concordant	100.136		1247.82	42.019
Karlstrom-JM16-77-1-29June2016-Spot 98		1242.26	17.9503	1250.54	26.8731	1227.9	16.2203		concordant	101.843		1250.54	26.8731
Karlstrom-JM16-77-1-29June2016-Spot 33		1250.57	21.4926	1250.92	32.4788	1249.96	17.1959		concordant	100.077		1250.92	32.4788
Karlstrom-JM16-77-1-29June2016-Spot 32		1243.76	23.8908	1253.67	35.9826	1226.62	20.7952		concordant	102.206		1253.67	35.9826
Karlstrom-JM16-77-1-29June2016-Spot 73		1248.45	15.2713	1255.34	23.1316	1236.6	12.4811		concordant	101.515		1255.34	23.1316
Karlstrom-JM16-77-1-29June2016-Spot 41		1298.3	37.727	1255.39	55.9663	1369.96	29.9344		concordant	91.6371		1255.39	55.9663
Karlstrom-JM16-77-1-29June2016-Spot 36		1240.32	18.3522	1258.66	27.9484	1208.61	15.1565		concordant	104.141		1258.66	27.9484
Karlstrom-JM16-77-1-29June2016-Spot 85		1250.89	24.7911	1258.82	38.4439	1237.29	14.8909		concordant	101.74		1258.82	38.4439
Karlstrom-JM16-77-1-29June2016-Spot 49		1248.61	21.8968	1263.43	33.9873	1223.11	14.0288		concordant	103.297		1263.43	33.9873
Karlstrom-JM16-77-1-29June2016-Spot 81		1262.72	25.2603	1269.82	38.778	1250.65	18.5077		concordant	101.533		1269.82	38.778
Karlstrom-JM16-77-1-29June2016-Spot 76		1298.05	26.4769	1277.59	38.7407	1332.02	26.5399		concordant	95.9136		1277.59	38.7407
Karlstrom-JM16-77-1-29June2016-Spot 13		1382.35	23.1038	1373.76	36.7489	1395.62	14.0338		concordant	98.4338		1373.76	36.7489
Karlstrom-JM16-77-1-29June2016-Spot 65		1422.39	21.2268	1379.73	33.479	1486.83	12.3874		concordant	92.7968		1379.73	33.479
Karlstrom-JM16-77-1-29June2016-Spot 83		1458.6	15.4617	1411.96	24.1007	1527.2	11.5784		concordant	92.4541		1411.96	24.1007
Karlstrom-JM16-77-1-29June2016-Spot 27		1443.17	19.7089	1422.49	31.3691	1473.76	13.4996		concordant	96.5212		1422.49	31.3691
Karlstrom-JM16-77-1-29June2016-Spot 38		1436.96	16.041	1424.75	24.7177	1455.06	14.9069		concordant	97.9168		1424.75	24.7177
Karlstrom-JM16-77-1-29June2016-Spot 80		1444.45	18.8239	1434.88	30.307	1458.55	12.2575		concordant	98.3776		1434.88	30.307
Karlstrom-JM16-77-1-29June2016-Spot 8		1449.91	18.0606	1438.51	28.6925	1466.63	13.7094		concordant	98.0828		1438.51	28.6925
Karlstrom-JM16-77-1-29June2016-Spot 29		1453.22	18.5431	1441.37	29.695	1470.58	13.043		concordant	98.0133		1441.37	29.695
Karlstrom-JM16-77-1-29June2016-Spot 102		1457.27	18.2755	1444.82	29.5352	1475.45	11.5743		concordant	97.9239		1444.82	29.5352
Karlstrom-JM16-77-1-29June2016-Spot 46		1448.09	17.5633	1446.22	28.6759	1450.83	10.1135		concordant	99.6824		1446.22	28.6759
Karlstrom-JM16-77-1-29June2016-Spot 12		1451.77	20.9576	1447.36	34.3265	1458.21	11.2508		concordant	99.2559		1447.36	34.3265
Karlstrom-JM16-77-1-29June2016-Spot 3		1458.77	24.6431	1450.64	40.5655	1470.62	11.717		concordant	98.6413		1450.64	40.5655
Karlstrom-JM16-77-1-29June2016-Spot 16		1456.92	18.1989	1457.49	29.4129	1456.06	12.753		concordant	100.099		1457.49	29.4129
Karlstrom-JM16-77-1-29June2016-Spot 18		1453.21	20.683	1458.54	33.7181	1445.41	13.3409		concordant	100.908		1458.54	33.7181
Karlstrom-JM16-77-1-29June2016-Spot 71		1467.55	21.5297	1462.94	35.3662	1474.22	11.8792		concordant	99.2345		1462.94	35.3662
Karlstrom-JM16-77-1-29June2016-Spot 75		1468.17	19.592	1473.05	32.4316	1461.1	10.4746		concordant	100.818		1473.05	32.4316
Karlstrom-JM16-77-1-29June2016-Spot 40		1468.99	19.0165	1474.7	29.9047	1460.73	17.5319		concordant	100.956		1474.7	29.9047
Karlstrom-JM16-77-1-29June2016-Spot 42		1467.22	17.2541	1478.55	27.3813	1450.84	15.3211		concordant	101.91		1478.55	27.3813
Karlstrom-JM16-77-1-29June2016-Spot 108		1562.18	19.1914	1569.94	31.1834	1551.69	16.6166		concordant	101.176		1551.69	16.6166
Karlstrom-JM16-77-1-29June2016-Spot 70		1641.61	22.5159	1650.52	38.611	1630.19	14.6601		concordant	101.247		1630.19	14.6601
Karlstrom-JM16-77-1-29June2016-Spot 9		1646.83	16.1665	1649.13	26.9512	1643.87	13.1888		concordant	100.32		1643.87	13.1888
Karlstrom-JM16-77-1-29June2016-Spot 72		1653.55	23.8315	1652.17	41.1209	1655.28	13.9008		concordant	99.812		1655.28	13.9008
Karlstrom-JM16-77-1-29June2016-Spot 106		1689.34	27.6462	1708.74	49.3428	1665.33	12.708		concordant	102.607		1665.33	12.708
Karlstrom-JM16-77-1-29June2016-Spot 48		1660.09	22.8943	1654.8	39.6885	1666.77	12.3683		concordant	99.282		1666.77	12.3683
Karlstrom-JM16-77-1-29June2016-Spot 104		1668.18	22.0956	1666.05	37.3694	1670.84	16.5168		concordant	99.7133		1670.84	16.5168
Karlstrom-JM16-77-1-29June2016-Spot 26		1640.86	18.6549	1608.73	31.1509	1682.26	12.6368		concordant	95.6292		1682.26	12.6368
Karlstrom-JM16-77-1-29June2016-Spot 90		1640.26	21.1241	1604.6	35.6295	1686.25	12.3716		concordant	95.1582		1686.25	12.3716
Karlstrom-JM16-77-1-29June2016-Spot 69		1679.88	21.568	1674.51	37.6768	1686.58	11.1929		concordant	99.2838		1686.58	11.1929
Karlstrom-JM16-77-1-29June2016-Spot 59		1689.27	24.6506	1688.48	43.2335	1690.24	12.9982		concordant	99.8959		1690.24	12.9982
Karlstrom-JM16-77-1-29June2016-Spot 57		1691.63	20.8837	1685.84	36.0915	1698.79	13.1635		concordant	99.2381		1698.79	13.1635
Karlstrom-JM16-77-1-29June2016-Spot 58		1718.53	24.8264	1733.85	44.1793	1699.9	13.4237		concordant	101.997		1699.9	13.4237
Karlstrom-JM16-77-1-29June2016-Spot 66		1719.37	20.2662	1731.18	35.1785	1705	14.3898		concordant	101.535		1705	14.3898
Karlstrom-JM16-77-1-29June2016-Spot 107		1720.94	21.0972	1732.86	36.7096	1706.46	14.7155		concordant	101.547		1706.46	14.7155
Karlstrom-JM16-77-1-29June2016-Spot 50		1723.36	37.816	1735.63	67.7544	1708.48	17.8822		concordant	101.589		1708.48	17.8822
Karlstrom-JM16-77-1-29June2016-Spot 62		1728.01	22.5377	1743.79	39.8907	1708.95	13.6467		concordant	102.038		1708.95	13.6467
Karlstrom-JM16-77-1-29June2016-Spot 91		1699.21	20.0201	1689.88	34.6366	1710.71	12.4737		concordant	98.7824		1710.71	12.4737
Karlstrom-JM16-77-1-29June2016-Spot 96		1720.21	23.8932	1727.81	41.7223	1710.95	15.719		concordant	100.985		1710.95	15.719
Karlstrom-JM16-77-1-29June2016-Spot 11		1717.52	28.161	1721.44	50.33	1712.73	12.4038		concordant	100.508		1712.73	12.4038
Karlstrom-JM16-77-1-29June2016-Spot 99		1733.24	21.7529	1748.99	38.3338	1714.25	14.0606		concordant	102.027		1714.25	14.0606
Karlstrom-JM16-77-1-29June2016-Spot 54		1717.96	22.8298	1720.25	39.5922	1715.16	15.5638		concordant	100.297		1715.16	15.5638
Karlstrom-JM16-77-1-29June2016-Spot 84		1740.73	17.9534	1758.47	30.9584	1719.46	14.2731		concordant	102.269		1719.46	14.2731
Karlstrom-JM16-77-1-29June2016-Spot 22		1705.21	18.9765	1692.61	32.755	1720.7	12.1211		concordant	98.3673		1720.7	12.1211
Karlstrom-JM16-77-1-29June2016-Spot 2		1736.49	21.9833	1748.37	38.9473	1722.19	13.1778		concordant	101.52		1722.19	13.1778
Karlstrom-JM16-77-1-29June2016-Spot 15		1728.71	27.4622	1734	48.8865	1722.31	14.1596		concordant	100.679		1722.31	14.1596
Karlstrom-JM16-77-1-29June2016-Spot 100		1732.08	18.9081	1738.53	33.4043	1724.29	11.1872		concordant	100.826		1724.29	11.1872
Karlstrom-JM16-77-1-29June2016-Spot 28		1738.84	19.5138	1749.97	34.4687	1725.48	12.1626		concordant	101.419		1725.48	12.1626
Karlstrom-JM16-77-1-29June2016-Spot 61		1736.16	20.9911	1744.81	36.8053	1725.73	13.8748		concordant	101.105		1725.73	13.8748
Karlstrom-JM16-77-1-29June2016-Spot 31		1710.66	25.246	1698.24	44.411	1725.89	12.5345		concordant	98.3974		1725.89	12.5345
Karlstrom-JM16-77-1-29June2016-Spot 55		1736.62	21.1975	1744.12	37.5539	1727.59	12.3576		concordant	100.957		1727.59	12.3576
Karlstrom-JM16-77-1-29June2016-Spot 44		1733.23	20.7453	1737.68	35.4612	1727.86	16.4979		concordant	100.568		1727.86	16.4979
Karlstrom-JM16-77-1-29June2016-Spot 110		1736.68	22.8081	1743.88	40.9047	1728	10.847		concordant	100.919		1728	10.847
Karlstrom-JM16-77-1-29June2016-Spot 56		1712.18	18.7645	1698.94	32.5794	1728.4	11.386		concordant	98.2955		1728.4	11.386
Karlstrom-JM16-77-1-29June2016-Spot 10		1729.26	21.4626	1729.78	37.8529	1728.63	12.3462		concordant	100.067		1728.63	12.3462
Karlstrom-JM16-77-1-29June2016-Spot 88		1694.27	21.7333	1666.59	37.1981	1728.67	13.48		concordant	96.4086		1728.67	13.48
Karlstrom-JM16-77-1-29June2016-Spot 94		1747.23	25.5703	1761.97	45.7844	1729.64	14.0235		concordant	101.869		1729.64	14.0235
Karlstrom-JM16-77-1-29June2016-Spot 17		1721.48	21.2769	1714.73	37.4081	1729.69	11.7792		concordant	99.1347		1729.69	11.7792
Karlstrom-JM16-77-1-29June2016-Spot 86		1713.43	23.1425	1700.14	40.1215	1729.7	14.3341		concordant	98.2914		1729.7	14.3341
Karlstrom-JM16-77-1-29June2016-Spot 7		1737.87	17.334	1744.43	29.9559	1729.96	12.9487		concordant	100.836		1729.96	12.9487
[truncated: 1,014 more rows]

## Sheet: uRCG MDA
Jacob Quartzite
Preferred Max Depositional age:		~1150
Conservative Max Depositional age		~1170
All concordant Data					< 10% discordant				< 5% discordant
Youngest Grain	Unmix Peaks	Wtd Av			Youngest Grain	Unmix Peaks	Wtd Av		Youngest Grain	Unmix Peaks	Wtd Av	Wtd Av youngest pop
1054±25 Ma	1054 ±25 Ma (5% fraction)	1164±12 Ma			1142±29 Ma	1152.9 ±13 Ma (35% fraction)	1170±12 Ma		1144±24 Ma	1153.8 ±13 Ma (34% fraction)	1171±14 Ma	1152±12 Ma
	1163.8 ±6.6 Ma (95% fraction)	MSWD=2.9				1186.5 ±12 Ma (65% fraction)	MSWD=2.0			1188.6 ±13 Ma (66% fraction)	MSWD=2.2	MSWD=0.32
		Prob=0.000					Prob=0.018				Prob=0.021	Prob=0.72
		n=18					n=13				n=10	n=3
Irby Silstone
Preferred Max Depositional age:		~1250
Conservative Max Depositional age		~1270
All concordant Data					< 10% discordant				< 5% discordant
Youngest Grain	Unmix Peaks	Wtd Av			Youngest Grain	Unmix Peaks	Wtd Av		Youngest Grain	Unmix Peaks	Wtd Av	Wtd Av youngest pop
1183±30 Ma	1255.7 ±14 Ma (20% fraction)	1273.0±6.2 Ma			1245±20 Ma	1255.4 ±15 Ma (19% fraction)	1277.60±5.3 Ma		1245±20 Ma	156.4 ±13 Ma (31% fraction)	1274.2±7.0 Ma	1251±10 Ma
	1281.1 ±6.5 Ma (80% fraction)	MSWD=1.9				1281.3 ±6.4 Ma (81% fraction)	MSWD=1.18			1282.4 ±7.9 Ma (69% fraction)	MSWD=1.7	MSWD=0.116
		Prob=0.001					Prob=0.22				Prob=0.015	Prob=0.99
		n=37					n=33				n=26	n=6

## Sheet: uRCG Raw and Std
Upper Rocky Cape Group, Tasmania (This study)
LA-ICPMS, University of Tasmania
Methods follow:	Halpin, J.A., Jensen, T., McGoldrick, P., Meffre, S., Berry, R.F., Everard, J.L., Calver, C.R., Thompson, J., Goemann, K., and Whittaker, J.M., 2014, Authigenic monazite and detrital zircon dating from the Proterozoic Rocky Cape Group, Tasmania: Links to the Belt-Purcell Supergroup, North America: Precambrian Research, v. 250, p. 50–67
Jacob Quartzite (uRCG)
Analysis	File name	206Pb/238U		208Pb/232Th		207Pb/206Pb			Pb204	Pb206	Pb207	Pb208	Th232	U238	Ti49	Fe56	Hf178		238U/206Pb		207Pb/206Pb		common Pb		206Pb/238U		208Pb/232Th		207Pb/206Pb			spot size	repetition	fluence	mode		Hg202	Pb204	Pb206	Pb207	Pb208	Th232	U238	Ti49	Fe56	Zr91	Hf178	Fe56BG	Analysis
Jacob Quartzite (uRCG)		ratio	+/-1 RSE	ratio	+/-1 RSE	ratio	+/-1 RSE		ppm	ppm	ppm	ppm	ppm	ppm	ppm	ppm	ppm		ratio	+/-1 std err	ratio	+/-1 std err	at age of zirc		age		age	+/-1 ster	age	+/-1 ster		micron	rate Hz	Jcm-2
2015-329-001	OC07A008	0.326079	0.0105899	0.103181	0.0170044	0.114203	0.00906953		0.0225434	-1.63166	18.2039	-1.95663	194.154	-107.239	136.005	570.387	12081.9		3.06674	0.0324766	0.114203	0.00103576	0.983792		1819.35	19.2668	1984.79	33.7502	1867.34	8.18284		29	5	1.4	Spot		11.8038	32.3116	63032	6963.14	15108.3	134024	175118	3152.31	444924	6.0122e+07	5.92987e+06	107443	8
2015-329-002	OC07A009	0.242556	0.0126894	0.0851458	0.0169228	0.0965462	0.0106703		0.000530321	-0.874703	7.93444	-0.956458	109.365	-76.9023	16.5088	27.9465	14598.2		4.12275	0.0523152	0.0965462	0.00103018	0.943591		1399.97	17.7648	1651.63	27.9502	1558.42	10.0093		29	5	1.4	Spot		42.0159	0.733176	32223	3014.1	7031.28	73436.3	118761	371.732	20990	5.79859e+07	6.91096e+06	106887	9
2015-329-004	OC07A011	0.306652	0.0129645	0.0908211	0.0146675	0.11769	0.00707919		6.70931e-08	-1.70534	17.4638	-2.63012	266.187	-121.068	35.4009	64.0512	13698.2		3.26103	0.0422776	0.11769	0.00083315	0.97436		1724.21	22.3535	1757.06	25.7718	1921.44	6.34589		29	5	1.4	Spot		123.934	0.0001	66173.4	7563.24	20297.1	195934	193529	871.623	51681.5	6.25016e+07	6.9911e+06	106712	11
2015-329-005	OC07A012	0.321262	0.00994299	0.0905175	0.0138139	0.107473	0.0046775		6.76871e-08	-3.94067	35.5398	-6.0424	600.303	-269.019	33.0999	75.6128	12975.3		3.11273	0.0309498	0.107473	0.000502703	0.98145		1795.89	17.8565	1751.44	24.1942	1757	4.27763		29	5	1.4	Spot		63.864	0.0001	149790	15671.1	45597.8	441609	417412	813.493	60368.4	6.19471e+07	6.564e+06	106479	12
2015-329-006	OC07A013	0.328753	0.010027	0.0931616	0.0153075	0.109179	0.00658625		6.70826e-08	-1.79807	15.8388	-1.6899	156.749	-120.578	37.4405	10.1171	12736.3		3.0418	0.0305001	0.109179	0.000719083	0.985093		1832.33	18.3728	1800.38	27.5593	1785.77	6.00176		29	5	1.4	Spot		0.0001	0.0001	68143.6	7233.37	12691.6	117304	184776	934.942	8135.8	6.24994e+07	6.50114e+06	108836	13
2015-329-007	OC07A014	0.308505	0.0107986	0.0890773	0.0158784	0.109226	0.00724359		6.84966e-08	-1.75752	14.9317	-1.77612	173.315	-128.094	22.3234	57.4809	12189.9		3.24144	0.0350029	0.109226	0.00079119	0.975258		1733.35	18.7176	1724.73	27.3859	1786.55	6.60013		29	5	1.4	Spot		74.2256	0.0001	64447.7	6850.37	12882.7	128056	188081	549.722	45189.7	6.12033e+07	6.09373e+06	109680	14
2015-329-008	OC07A015	0.340787	0.00943005	0.0983714	0.0144545	0.112841	0.00408447		6.7516e-08	-7.03066	59.4548	-3.30873	284.323	-467.066	3.5451	22.981	13827.8		2.93438	0.0276714	0.112841	0.000460897	0.990955		1890.45	17.8271	1896.48	27.4128	1845.67	3.69482		29	5	1.4	Spot		12.414	0.0001	258375	28367.8	24005.8	214844	680363	89.1763	18296.9	6.20863e+07	7.01287e+06	108760	15
2015-329-009	OC07A016	0.334445	0.0115516	0.0921602	0.0137445	0.10755	0.00525504		0.00861428	-3.37464	26.2186	-4.5622	411.274	-234.02	26.8345	25.6469	13186.9		2.99003	0.0345398	0.10755	0.000565179	0.987864		1859.89	21.4848	1781.86	24.4907	1758.31	4.805		29	5	1.4	Spot		0.0001	12.929	124124	12987	33063.9	317434	337626	688.693	20655.1	6.29084e+07	6.77697e+06	108085	16
2015-329-010	OC07A017	0.260439	0.010421	0.0755667	0.0150428	0.0942925	0.00869452		0.0136468	-1.34923	8.87895	-1.6191	174.429	-120.345	25.224	9.91132	11185.7		3.83967	0.0400133	0.0942925	0.000819828	0.95211		1492.09	15.5491	1472.41	22.1493	1513.98	8.20402		29	5	1.4	Spot		0.0001	20.675	49469.2	4545.57	11673.5	136974	171204	657.885	8043.03	6.34944e+07	5.8026e+06	108118	17
2015-329-011	OC07A018	0.319126	0.0109251	0.0889292	0.0148266	0.107919	0.00830267		0.00340226	-0.999833	7.26463	-2.0591	183.29	-73.6015	40.7058	4.23387	11831.1		3.13356	0.0342346	0.107919	0.000896016	0.980412		1785.46	19.5064	1721.98	25.531	1764.58	7.58574		29	5	1.4	Spot		29.3937	5.11527	35920.8	3776.98	14517.1	143961	101450	1060.7	3403.59	6.30055e+07	6.09068e+06	108616	18
2015-329-012	OC07A019	0.30924	0.0104662	0.0764956	0.0164364	0.108389	0.00391312		0.0113206	-8.97558	63.162	-3.71329	379.698	-688.228	16.801	121.581	13945		3.23373	0.0338449	0.108389	0.000424141	0.975614		1736.97	18.1795	1489.86	24.488	1772.52	3.5717		29	5	1.4	Spot		22.9967	16.7203	312730	32995.3	25335.4	295251	909305	432.952	95843.7	6.18885e+07	7.05225e+06	108493	19
2015-329-013	OC07A020	0.205591	0.0334075	0.0524554	0.024339	0.108401	0.00478994		0.0160446	-5.13605	34.9092	-5.36667	846.843	-648.526	127.97	857.169	12840.3		4.86402	0.162494	0.108401	0.000519232	0.926179		1205.29	40.2656	1033.37	25.1512	1772.71	4.37191		29	5	1.4	Spot		18.5578	23.0909	172115	18165.5	35140.5	646609	814173	3234.65	657245	6.02985e+07	6.3273e+06	107592	20
2015-329-014	OC07A021	0.328088	0.0104979	0.093098	0.015978	0.108267	0.00703625		0.0193915	-1.87324	12.2675	-1.30905	103.47	-138.924	28.0634	9.41047	13072.4		3.04796	0.0319971	0.108267	0.000761793	0.98477		1829.11	19.2018	1799.21	28.7478	1770.46	6.42398		29	5	1.4	Spot		0.0001	29.2882	65016.1	6845.41	8857.74	83549.3	178374	749.349	7559	6.32753e+07	6.76028e+06	107790	21
2015-329-015	OC07A022	0.326404	0.0101763	0.0931101	0.0150444	0.108448	0.00634384		6.187e-08	-2.41555	15.2803	-2.92474	223.776	-184.57	21.8863	10.4864	12098.1		3.06368	0.0311769	0.108448	0.00068798	0.98395		1820.93	18.5303	1799.43	27.0714	1773.51	5.78963		29	5	1.4	Spot		50.5597	0.0001	88527	9319.2	20848.9	194840	246974	629.495	8997.84	6.77066e+07	6.69522e+06	106754	22
2015-329-016	OC07A023	0.592291	0.0102815	0.160116	0.0153456	0.221129	0.00519638		0.00711405	-2.03749	25.5064	-1.78132	79.7452	-86.8426	8.09763	5.72166	9315.68		1.68836	0.0173588	0.221129	0.00114907	1.10909		2998.7	30.831	3001.92	46.0662	2988.93	4.18047		29	5	1.4	Spot		25.7506	10.8918	69780.4	15043	11838.2	66267.6	107121	222.053	4642.15	6.41286e+07	4.88337e+06	106847	23
2015-329-017	OC07A024	0.268404	0.0202269	0.0430154	0.0173525	0.110018	0.00894761		0.00312451	-4.99234	30.0188	-7.68665	799.713	-503.331	39.3725	441.126	12728.3		3.72573	0.0753599	0.110018	0.000984401	0.955922		1532.69	31.0016	851.258	14.7715	1799.71	8.13958		29	5	1.4	Spot		33.1268	3.08229	108665	11640.7	32386.4	431405	389014	700.165	230190	4.13161e+07	6.74638e+06	246099	24
2015-329-018	OC07A028	0.338523	0.0100755	0.0975781	0.0146917	0.112635	0.00553773		6.75547e-08	-3.84961	20.6796	-3.19909	205.625	-307.839	16.4871	17.4504	10771.7		2.95401	0.0297631	0.112635	0.00062374	0.989851		1879.56	18.9374	1881.88	27.648	1842.35	5.01146		29	5	1.4	Spot		54.9763	0.0001	118785	12997.3	18906.8	171403	316558	451.253	13565.9	6.19735e+07	5.45926e+06	104437	28
2015-329-019	OC07A029	0.264531	0.0118815	0.0687889	0.0177351	0.100556	0.00881573		0.0179512	-3.22162	14.952	-5.27793	497.642	-353.311	23.338	148.748	12782.3		3.78028	0.0449155	0.100556	0.000886475	0.954067		1512.98	17.9766	1344.64	23.8474	1634.39	8.18822		29	5	1.4	Spot		5.13411	29.8132	109899	10738.8	34386.7	468766	394603	721.141	129502	6.95242e+07	7.26823e+06	106124	29
2015-329-020	OC07A030	0.344748	0.0102548	0.0982627	0.0147978	0.114455	0.00587721		0.0106284	-2.73481	14.0161	-2.14532	129.886	-223.193	8.7894	7.25808	12902.9		2.90067	0.0297456	0.114455	0.000672678	0.992886		1909.47	19.5812	1894.48	28.0342	1871.32	5.30008		29	5	1.4	Spot		21.9115	16.3298	85026	9482.27	12701.1	113999	223004	252.815	5835.21	6.43117e+07	6.78734e+06	107449	30
2015-329-021	OC07A031	0.339022	0.0114817	0.0936985	0.0172724	0.112051	0.00950797		5.69681e-08	-2.31452	11.1958	-2.50098	164.042	-206.756	15.5426	6.38286	11063.2		2.94966	0.0338672	0.112051	0.00106537	0.990094		1881.96	21.6082	1810.31	31.2683	1832.94	8.61425		29	5	1.4	Spot		46.6574	0.0001	80975.7	8808.23	16611.4	165664	227970	513.925	5852.18	7.34692e+07	6.64883e+06	107169	31
2015-329-022	OC07A032	0.318812	0.0144656	0.0953948	0.0167101	0.108294	0.00796637		0.0175106	-1.57608	7.14074	-1.65297	99.5653	-148.156	30.5252	9.74329	11934.5		3.13665	0.0453734	0.108294	0.000862713	0.980259		1783.92	25.8055	1841.63	30.7738	1770.92	7.27275		29	5	1.4	Spot		0.0001	26.3473	46542.6	4900.03	9237.84	86797.6	135083	870.483	7643.37	6.29697e+07	6.14801e+06	106813	32
2015-329-023	OC07A033	0.211093	0.0101082	0.0609977	0.0139859	0.0807262	0.00658635		6.56827e-08	-4.06138	13.3193	-7.18493	651.77	-574.328	8.0767	0.000126212	14072.9		4.73726	0.047885	0.0807262	0.000531691	0.928752		1234.64	12.4799	1196.76	16.7377	1214.79	6.47815		29	5	1.4	Spot		35.9811	0.0001	119473	9407.53	39868.7	578951	510466	234.472	0.1	6.37093e+07	7.33536e+06	107513	33
2015-329-024	OC07A034	0.300833	0.0109173	0.0855968	0.0149447	0.109797	0.00666049		0.00913917	-2.6371	11.3425	-3.52262	222.667	-270.074	51.6592	158.324	11680.6		3.32411	0.0362902	0.109797	0.0007313	0.971542		1695.44	18.5095	1660.03	24.8086	1796.04	6.06174		29	5	1.4	Spot		0.0001	14.4195	79125.8	8442.95	19870.3	206402	239317	1563.59	129762	6.6017e+07	6.30951e+06	108410	34
2015-329-025	OC07A035	0.20507	0.0121458	0.0651286	0.0189071	0.0852682	0.00949724		5.74646e-08	-2.21264	7.12602	-1.7765	150.624	-355.464	19.706	25.4673	13115.3		4.87639	0.0592276	0.0852682	0.000809813	0.925936		1202.5	14.6053	1275.3	24.1123	1321.65	9.20026		29	5	1.4	Spot		27.9822	0.0001	72052.9	5947.93	10837.6	155060	333702	661.817	22979.7	7.28066e+07	7.81379e+06	109580	35
2015-329-030	OC07A040	0.301814	0.0137999	0.0889424	0.0156821	0.108434	0.00698957		7.2387e-08	-5.16519	18.0906	-4.46233	220.65	-592.94	37.0297	58.1424	13458.3		3.3133	0.0457231	0.108434	0.000757904	0.972017		1700.3	23.464	1722.22	27.0081	1773.27	6.37914		29	5	1.4	Spot		64.6993	0.0001	122672	12968.7	19469.3	186510	351179	1016.8	41266.9	5.777e+07	6.36498e+06	109939	40
2015-329-031	OC07A041	0.263122	0.0146842	0.0853953	0.0162837	0.11443	0.00808494		0.0113916	-1.8783	6.7084	-2.22212	116.814	-269.614	26.8524	107.801	10521.6		3.80052	0.0558076	0.11443	0.000925157	0.953393		1505.8	22.1114	1656.28	26.9702	1870.92	7.29137		29	5	1.4	Spot		22.9086	16.5631	46120.1	5138.09	9979.67	104611	159387	780.55	80379.2	6.07963e+07	5.23724e+06	110415	41
2015-329-031b	OC07A047	0.329474	0.010023	0.0925361	0.0143192	0.109972	0.0059027		0.0101955	-3.31902	9.33467	-4.62749	184.187	-501.674	30.0601	0.000128409	11449.9		3.03514	0.0304213	0.109972	0.000649132	0.985444		1835.83	18.4006	1788.82	25.6144	1798.94	5.37016		29	5	1.4	Spot		0.701903	15.6564	76780.5	8225.95	18990.9	181091	210981	954.809	0.1	6.41735e+07	6.01907e+06	109905	47
2015-329-032	OC07A042	0.244189	0.0131858	0.0578753	0.0152349	0.107604	0.00711044		0.0277296	-5.40854	17.5682	-6.13228	477.525	-911.308	43.2319	247.5	12633.6		4.09519	0.0539985	0.107604	0.000765114	0.944367		1408.44	18.5714	1137.19	17.325	1759.24	6.50076		29	5	1.4	Spot		0.0001	48.0247	155339	16266.7	32067.4	512740	606785	1505.52	219411	7.24103e+07	7.49041e+06	108011	42
2015-329-033	OC07A043	0.262792	0.0123086	0.0572537	0.018936	0.108219	0.00695904		7.51547e-08	-4.99344	15.7396	-4.17733	299.056	-739.334	31.4341	362.331	11597		3.80529	0.0468377	0.108219	0.0007531	0.953235		1504.11	18.5134	1125.31	21.3088	1769.65	6.35413		29	5	1.4	Spot		48.0081	0.0001	108166	11361	16396.9	248319	356443	845.845	246324	5.56265e+07	5.28256e+06	109091	43
2015-329-035	OC07A049	0.243664	0.0117296	0.0442051	0.0149199	0.105686	0.00527742		0.00337469	-9.58601	24.2856	-13.9797	1062.33	-2172.44	77.6306	575.739	11179		4.10401	0.0481382	0.105686	0.000557749	0.944118		1405.72	16.4885	874.299	13.0445	1726.28	4.84482		29	5	1.4	Spot		60.1167	4.10431	168552	17412.7	43080.2	837687	606787	1974.68	353776	5.08154e+07	4.65422e+06	106672	49
2015-329-036	OC07A050	0.228584	0.0119171	0.033683	0.0164247	0.104256	0.00564397		0.0119027	-10.3401	24.8919	-11.1625	1112.35	-2776.92	98.0027	677.341	12975.6		4.37475	0.0521344	0.104256	0.000588419	0.936977		1327.08	15.8149	669.595	10.9979	1701.23	5.1977		29	5	1.4	Spot		49.9465	13.2631	163079	16569.4	30654.2	808659	642259	2296.59	380619	4.65531e+07	4.94949e+06	105954	50
2015-329-037	OC07A051	0.325376	0.0099122	0.0930199	0.0159455	0.110397	0.00610018		0.00198203	-4.71001	11.5644	-2.50549	87.2756	-984.283	19.6791	30.8663	13819.8		3.07337	0.0304639	0.110397	0.000673442	0.98345		1815.93	17.9998	1797.77	28.6662	1805.95	5.54504		29	5	1.4	Spot		0.0001	3.00592	98935.5	10614.5	9101.27	86890.2	276859	631.088	23562.4	6.33542e+07	7.17471e+06	102586	51
2015-329-038	OC07A052	0.2138	0.0115564	0.0402088	0.0156441	0.101373	0.00729022		0.054366	-15.487	33.6764	-22.1983	1633.4	-5167.84	155.645	1306.34	14566.5		4.67726	0.0540522	0.101373	0.000739033	0.930021		1249.03	14.4343	796.796	12.4652	1649.41	6.75823		29	5	1.4	Spot		41.466	48.692	187906	18490.6	46242.4	966278	756200	2963.75	587808	3.74107e+07	4.46593e+06	102181	52
2015-329-039	OC07A053	0.249394	0.0106041	0.0689282	0.0179923	0.0892182	0.00757821		6.94855e-08	-4.29239	7.94047	-6.12121	279.411	-1458.68	10.0272	37.5103	10611.1		4.00973	0.0425197	0.0892182	0.000676115	0.946842		1435.35	15.2206	1347.28	24.2405	1408.85	7.253		29	5	1.4	Spot		30.0626	0.0001	81811	7095.15	19879.4	267229	296615	308.466	27069.8	6.01076e+07	5.22744e+06	103468	53
2015-329-040	OC07A054	0.199065	0.0106482	0.0382262	0.0145669	0.1039	0.00570503		0.0395721	-14.3996	29.9658	-34.0437	2697.46	-7508.5	140.251	1513.99	11727.6		5.02348	0.0534911	0.1039	0.000592752	0.923135		1170.3	12.4616	758.235	11.0451	1694.92	5.25813		29	5	1.4	Spot		53.1256	66.5384	313313	31678.4	125210	3.03256e+06	1.5051e+06	5068.1	1.27414e+06	7.02208e+07	6.75017e+06	105631	54
2015-329-042	OC07A056	0.288571	0.00964237	0.0841221	0.0137035	0.104251	0.00469107		0.011166	-8.3666	16.2195	-10.8976	347.418	-4308.36	12.5975	46.1001	12161		3.46535	0.0334142	0.104251	0.000489048	0.965619		1634.39	15.7593	1632.55	22.3717	1701.14	4.32019		29	5	1.4	Spot		36.9347	17.6282	162914	16500.1	35249.6	371158	510583	431.995	36289.1	6.59188e+07	6.57198e+06	106374	56
2015-329-043	OC07A057	0.177611	0.0129255	0.0590681	0.0171824	0.0823945	0.0135984		0.0130605	-3.0957	4.55439	-5.08369	234.863	-3820.97	20.9952	129.4	11294.4		5.63028	0.0727744	0.0823945	0.00112044	0.913197		1053.91	13.6224	1159.97	19.931	1254.91	13.2982		29	5	1.4	Spot		29.8979	23.3142	66483.2	5302.4	17965	285403	361489	818.387	114957	7.45276e+07	6.90137e+06	106065	57
2015-329-044	OC07A058	0.249499	0.0103782	0.0740081	0.0149025	0.0891239	0.00813704		0.00443732	-3.48765	5.37907	-4.78909	160.224	-4825.16	14.3654	0.258076	12162		4.00803	0.041596	0.0891239	0.000725205	0.946892		1435.89	14.9019	1443.1	21.5059	1406.82	7.79001		29	5	1.4	Spot		15.6334	6.9364	63938.1	5549.89	14302.1	171513	233331	492.939	200.389	6.52574e+07	6.50769e+06	106893	58
2015-329-045	OC07A059	0.320907	0.00994841	0.0922789	0.0162436	0.108404	0.005664		6.41319e-08	-7.34561	13.2608	-3.27668	83.8325	-26836.6	6.73593	22.7113	13551.4		3.11617	0.031001	0.108404	0.000614002	0.981277		1794.15	17.849	1784.06	28.9795	1772.77	5.16966		29	5	1.4	Spot		44.0554	0.0001	130858	13809.5	9407.41	90043.7	371400	231.77	17557.1	6.5088e+07	7.23296e+06	107784	59
2015-329-047	OC07A061	0.278128	0.011255	0.0754542	0.0155986	0.103031	0.00816546		0.0013247	-4.23627	6.74148	-8.52379	243.589	4206.36	18.385	134.689	11472.7		3.59547	0.0404672	0.103031	0.000841294	0.96059		1581.93	17.8046	1470.3	22.9346	1679.42	7.54064		29	5	1.4	Spot		2.96661	1.90483	65903	6625.74	20871.7	244107	213093	589.44	95653	6.00112e+07	5.64688e+06	106868	61
2015-329-048	OC07A062	0.336562	0.0113107	0.0945679	0.0142466	0.110983	0.00677756		0.00316633	-4.74064	7.78845	-9.60514	211.936	2352.44	28.8852	11.3292	11920.9		2.97122	0.0336065	0.110983	0.000752195	0.988896		1870.11	21.1522	1826.37	26.0196	1815.58	6.15351		29	5	1.4	Spot		36.8989	4.80375	75633.3	8168.72	23807.1	225384	204421	982.131	8472.62	6.33103e+07	6.19054e+06	106942	62
2015-329-049	OC07A063	0.346919	0.0100846	0.100446	0.0149851	0.114241	0.00653317		6.53079e-08	-5.46003	8.85299	-5.17413	100.872	1832.27	9.75815	1.65024	12250.3		2.88252	0.0290692	0.114241	0.000746358	0.993945		1919.87	19.3612	1934.63	28.9907	1867.95	5.89402		29	5	1.4	Spot		12.9642	0.0001	85387.3	9477.37	12395.7	108892	222540	336.584	1243.21	6.38915e+07	6.42056e+06	106285	63
2015-329-050	OC07A064	0.236666	0.00979457	0.0685559	0.0144584	0.0858617	0.00560237		0.00805988	-8.47496	9.92281	-8.71173	236.863	3175.16	4.41241	24.5391	14044		4.22536	0.0413856	0.0858617	0.000481029	0.940798		1369.34	13.4121	1340.24	19.3777	1335.07	5.41699		29	5	1.4	Spot		38.2452	12.0544	125618	10491.6	19484.6	251180	481327	149.415	18022	6.23999e+07	7.18946e+06	103664	64
2015-329-051	OC07A065	0.316631	0.0105562	0.0942369	0.0161137	0.107932	0.0065549		0.0352735	-4.48121	6.31248	-5.0051	94.0969	996.928	16.0831	6.27828	11916.4		3.15825	0.0333392	0.107932	0.000707486	0.9792		1773.26	18.7189	1820.26	29.331	1764.8	5.98872		29	5	1.4	Spot		53.3351	53.8304	65705.5	6885.68	10894.6	102398	187729	558.534	4695.83	6.36657e+07	6.22459e+06	106626	65
2015-329-053	OC07A067	0.264701	0.0147702	0.0801149	0.0169453	0.101541	0.00728694		0.0134282	-6.9892	8.50757	-7.79488	153.24	1272.78	7.67058	150.83	13136.1		3.77784	0.0557994	0.101541	0.000739921	0.954149		1513.85	22.3599	1557.7	26.3957	1652.47	6.75253		29	5	1.4	Spot		27.269	19.7266	92435.1	9128.55	14750.4	162345	313091	259.016	108178	6.12743e+07	6.60512e+06	105364	67
2015-329-054	OC07A070	0.231693	0.0155339	0.0787995	0.0191455	0.0995306	0.0186588		5.9009e-08	-1.33905	1.37994	-2.84455	49.031	189.522	16.3708	60.0917	12857.6		4.31606	0.0670451	0.0995306	0.00185713	0.938445		1343.36	20.8676	1533.07	29.3515	1615.33	17.3734		29	5	1.4	Spot		121.51	0.0001	18370.5	1762.85	5210.68	60927.6	74994.4	647.255	49429.6	7.06644e+07	7.45781e+06	104219	70
2015-329-055	OC07A071	0.207975	0.016692	0.0587722	0.0217551	0.0875945	0.0141138		0.0123657	-7.72735	6.7226	-12.5715	241.075	957.966	14.2317	87.7081	13104.3		4.80826	0.0802594	0.0875945	0.00123629	0.927294		1218.02	20.3312	1154.32	25.1123	1373.61	13.5739		29	5	1.4	Spot		59.1495	14.4402	70322.6	5979.13	14855.1	207562	285830	389.641	49617.8	4.86889e+07	5.23764e+06	105288	71
2015-329-056	OC07A072	0.261489	0.0101281	0.0753604	0.0144039	0.0935813	0.00689161		0.00802919	-7.51589	6.67413	-12.6149	187.731	702.943	7.18279	0.000139097	12224.3		3.82425	0.0387324	0.0935813	0.000644925	0.952612		1497.46	15.1664	1468.54	21.1526	1499.68	6.51524		29	5	1.4	Spot		3.75219	11.9386	83713.5	7635.78	17685.5	206935	290059	251.624	0.1	6.19896e+07	6.22115e+06	104472	72
2015-329-057	OC07A073	0.288857	0.0100027	0.0834596	0.0147757	0.100061	0.00725712		6.72228e-08	-6.78385	6.09578	-9.79784	121.76	511.43	12.5235	5.51335	12848		3.46192	0.0346286	0.100061	0.000726155	0.965757		1635.81	16.3626	1620.2	23.9395	1625.22	6.74853		29	5	1.4	Spot		68.6623	0.0001	72545.1	7048.08	12736.6	135007	227870	441.058	3957.77	6.20123e+07	6.54148e+06	102199	73
2015-329-058	OC07A074	0.303044	0.0106992	0.0794014	0.0148394	0.108997	0.00605349		0.00100485	-9.16679	8.52072	-18.8412	225.161	588.193	23.3422	231.256	11503.1		3.29985	0.0353057	0.108997	0.000659812	0.972613		1706.39	18.257	1544.35	22.9172	1782.72	5.51836		29	5	1.4	Spot		40.5617	1.54381	96986.7	10277	23298.1	259240	290542	853.144	171116	6.40395e+07	6.04872e+06	102172	74
2015-329-061	OC07A077	0.253674	0.0130857	0.0796386	0.0150397	0.112781	0.00980308		0.034341	-9.20351	7.46895	-25.3286	218.98	503.932	22.8011	163.083	13555.1		3.94207	0.0515847	0.112781	0.0011056	0.948881		1457.4	19.071	1548.79	23.2933	1844.71	8.86892		29	5	1.4	Spot		20.2725	51.9073	83196.2	9126.97	22891.8	252049	295141	831.749	118024	6.29861e+07	7.01235e+06	102702	77
2015-329-062	OC07A078	0.331701	0.0099718	0.0919065	0.0143558	0.112354	0.00509835		0.00303973	-16.8539	12.8461	-36.7253	247.223	645.416	6.2211	25.2097	10678.7		3.01476	0.0300626	0.112354	0.000572818	0.986528		1846.62	18.4141	1777.16	25.5127	1837.83	4.61637		29	5	1.4	Spot		4.69157	4.58775	144445	15825.4	29320.7	285635	398850	227.673	18181.2	6.28858e+07	5.51603e+06	102005	78
2015-329-063	OC07A079	0.175792	0.0105561	0.0394892	0.0160494	0.0929721	0.00623762		0.0829546	-35.3652	20.8868	-95.4055	1214.28	2166.62	95.9183	1361.66	14503		5.68853	0.0600487	0.0929721	0.000579925	0.91236		1043.95	11.02	782.808	12.5636	1487.32	5.90675		29	5	1.4	Spot		52.1924	94.1463	215801	19533.6	49812.9	1.06051e+06	1.06085e+06	2652.1	736997	4.72834e+07	5.63327e+06	104425	79
2015-329-066	OC07A082	0.276176	0.010525	0.0634952	0.017236	0.100052	0.0048938		0.0098923	-27.421	14.1085	-75.0573	334.42	808.867	15.5566	106.619	13776.7		3.62087	0.0381096	0.100052	0.000489635	0.959652		1572.08	16.5461	1244.28	21.4464	1625.05	4.55093		29	5	1.4	Spot		0.0001	14.427	178819	17436.4	27730.3	381218	586681	560.54	73717	6.07439e+07	6.87632e+06	104032	82
2015-329-067	OC07A083	0.340819	0.0100887	0.0987657	0.0167361	0.112856	0.00594161		6.67715e-08	-15.3042	8.21122	-27.7193	58.1938	330.561	5.33657	18.5794	11674.5		2.9341	0.0296014	0.112856	0.000670545	0.99097		1890.61	19.0739	1903.74	31.8611	1845.9	5.37464		29	5	1.4	Spot		0.0001	0.0001	95574.1	10516.9	7657	68472.7	257081	198.376	13165.4	6.2372e+07	5.98375e+06	103536	83
2015-329-068	OC07A084	0.325135	0.0113156	0.0929906	0.0146142	0.109464	0.00710332		0.00326365	-11.7291	5.60463	-113.821	157.558	236.136	27.1778	35.0146	12670.2		3.07564	0.0348026	0.109464	0.000777556	0.983333		1814.76	20.5351	1797.22	26.265	1790.51	6.46917		29	5	1.4	Spot		0.0001	4.90531	68194.1	7269.71	19772.3	187005	192095	1018.58	24850.7	6.25897e+07	6.51734e+06	104116	84
2015-329-069	OC07A085	0.308148	0.0100715	0.0903967	0.0153182	0.106711	0.00671491		0.00759125	-14.0855	5.97345	-174.77	100.892	263.429	14.3285	84.9152	11189.5		3.24519	0.0326838	0.106711	0.000716553	0.975085		1731.59	17.4396	1749.2	26.7946	1743.98	6.15083		29	5	1.4	Spot		0.0001	11.3714	75257.5	7791.71	12231.5	119954	222240	537.662	59944	6.23733e+07	5.73631e+06	103338	85
2015-329-070	OC07A086	0.362984	0.0121959	0.108375	0.016537	0.167234	0.00512858		0.256053	-62.8368	38.0343	3013.48	665.383	853.233	44.0743	396.123	11521.9		2.75494	0.0335991	0.167234	0.000857674	1.00179		1996.3	24.3468	2079.74	34.3926	2530.15	4.30356		29	5	1.4	Spot		36.8134	348.13	278966	45431.7	90634.4	721666	678794	1507.94	253299	5.66067e+07	5.36108e+06	102715	86
2015-329-071	OC07A087	0.207528	0.0106291	0.0611402	0.015733	0.082114	0.0114067		6.58951e-08	-6.20435	1.65703	69.9415	113.371	130.844	19.1791	0.996814	11546.1		4.81863	0.0512175	0.082114	0.000936651	0.927084		1215.63	12.921	1199.47	18.8713	1248.24	11.1655		29	5	1.4	Spot		38.2052	0.0001	27906.9	2228.85	9653.59	137939	120544	735.754	710.043	6.31775e+07	5.99646e+06	104956	87
2015-329-073	OC07A089	0.309343	0.0116139	0.0932501	0.0148063	0.110071	0.00771169		0.0160006	-21.5728	6.03892	42.1508	113.487	241.325	25.0411	188.503	11529.2		3.23266	0.0375436	0.110071	0.000848831	0.975664		1737.47	20.1788	1802.02	26.6812	1800.57	7.01453		29	5	1.4	Spot		32.5779	23.4195	74558.9	7971.89	14101.5	134511	229928	934.895	128985	6.09217e+07	5.77491e+06	104422	89
2015-329-074	OC07A093	0.268936	0.0119188	0.0627825	0.0211959	0.103051	0.00800679		0.0156579	-40.7272	5.05414	10.1044	90.9158	225.595	18.9644	94.9069	11693.2		3.71836	0.0443184	0.103051	0.000825108	0.956177		1535.4	18.3001	1230.73	26.0865	1679.79	7.39377		29	5	1.4	Spot		0.0001	27.9559	84115.2	8419.28	9086.19	134057	297512	879.16	78580	7.4286e+07	7.1445e+06	105800	93
2015-329-075	OC07A094	0.259808	0.010089	0.0763047	0.0149211	0.0928576	0.00650414		6.73032e-08	-50.3492	4.13181	17.29	137.581	198.257	26.9503	13.2795	12050.7		3.84899	0.0388326	0.0928576	0.000603959	0.951809		1488.86	15.0212	1486.28	22.1768	1484.98	6.16106		29	5	1.4	Spot		14.2144	0.0001	64021	5775.58	14704.5	169645	224040	1044.3	9131.49	6.18145e+07	6.12729e+06	105110	94
2015-329-076	OC07A095	0.317935	0.0129465	0.0934115	0.0159288	0.110206	0.00794268		6.4918e-08	-61.1489	3.82174	10.0638	73.8967	125.692	19.3024	56.1965	11923.7		3.1453	0.0407206	0.110206	0.000875329	0.979834		1779.64	23.0401	1805	28.7516	1802.8	7.22266		29	5	1.4	Spot		18.9885	0.0001	52263.8	5584.19	9938.76	94923.5	151499	778.825	39981.3	6.40796e+07	6.28542e+06	102316	95
2015-329-077	OC07A096	0.320783	0.0103147	0.0842446	0.0145175	0.108733	0.005317		0.00886488	-337.894	9.50626	21.706	195.661	306.34	1442.64	89.4609	12220.9		3.11737	0.0321547	0.108733	0.000578131	0.981217		1793.55	18.5	1634.84	23.7338	1778.29	4.84963		29	5	1.4	Spot		0.0001	13.3246	128988	13664.6	23158.5	246425	370374	57045.6	61978.7	6.25207e+07	6.28588e+06	104888	96
2015-329-078	OC07A097	0.215784	0.0118622	0.0628956	0.0171766	0.0930181	0.00636183		0.020752	1613.86	7.10655	32.1588	428.146	383.502	49.324	194.037	12265.1		4.63426	0.0549726	0.0930181	0.000591766	0.930952		1259.56	14.9412	1232.88	21.1768	1488.26	6.02361		29	5	1.4	Spot		26.7587	31.4864	114710	10395.4	37987	546929	480788	1977.37	135423	6.31053e+07	6.36818e+06	106714	97
2015-329-079	OC07A098	0.242597	0.0103214	0.070624	0.0149628	0.0899162	0.00786755		6.39978e-08	102.521	3.21653	8.40767	104.969	157.277	10.8251	29.9963	9725.51		4.12207	0.0425455	0.0899162	0.000707421	0.943611		1400.18	14.4518	1379.32	20.6385	1423.75	7.51459		29	5	1.4	Spot		33.3058	0.0001	55685.3	4884.59	11130.2	138751	208440	448.853	21515.9	6.49824e+07	5.20027e+06	105466	98
2015-329-080	OC07A099	0.326777	0.0104317	0.0921941	0.0143375	0.109547	0.00636884		0.00740974	94.036	6.61205	16.2827	166.762	199.932	19.3288	13.1768	12842.4		3.06019	0.031923	0.109547	0.000697685	0.984132		1822.74	19.0142	1782.49	25.5564	1791.88	5.79927		29	5	1.4	Spot		3.91423	11.4303	94044.5	9991.97	23004.8	218648	268340	794.625	9311.75	6.41465e+07	6.77913e+06	105530	99
2015-329-081	OC07A100	0.325174	0.0130691	0.0928448	0.0228964	0.108703	0.0130958		0.0176756	48.7286	4.91915	6.01094	69.7095	156.695	12.7632	2.93858	12199.3		3.07528	0.040191	0.108703	0.00142356	0.983352		1814.95	23.7197	1794.53	41.0883	1777.8	11.9454		29	5	1.4	Spot		13.9918	33.1093	86618.4	9098.22	11085.4	111509	261801	639.876	2516.47	7.78852e+07	7.81962e+06	104560	100
2015-329-082	OC07A101	0.33032	0.0111999	0.0952963	0.016403	0.110039	0.00798082		0.00150351	43.2072	5.8049	9.42711	112.534	171.814	11.7138	27.0147	11631.2		3.02737	0.0339062	0.110039	0.000878202	0.985856		1839.93	20.607	1839.82	30.1784	1800.05	7.2598		29	5	1.4	Spot		46.9737	2.62233	94165.8	10075.5	17316.7	168401	273846	549.143	21496.5	7.25134e+07	6.9418e+06	104438	101
2015-329-083	OC07A102	0.279743	0.0113979	0.0647465	0.0179918	0.110756	0.0053999		0.00726286	61.2013	10.2286	11.7493	211.77	329.044	15.4572	251.482	11360.6		3.57471	0.0407441	0.110756	0.00059807	0.961367		1590.07	18.1234	1268.05	22.8145	1811.85	4.90494		29	5	1.4	Spot		91.5395	11.602	151545	16387.3	21055.2	291603	491834	666.504	182904	6.64079e+07	6.21e+06	105741	102
2015-329-084	OC07A103	0.248365	0.0151241	0.0750052	0.0242805	0.0939926	0.020478		0.00842089	3.65595	0.607684	1.27776	20.3521	25.3475	20.7414	2.6383	10523		4.02633	0.0608944	0.0939926	0.00192478	0.946352		1430.04	21.628	1461.86	35.4947	1507.96	19.3383		29	5	1.4	Spot		0.0001	12.544	10078.2	914.889	2265.88	26254.6	36156.9	837.519	1785.67	6.19203e+07	5.36388e+06	106067	103
2015-329-085	OC07A104	0.214782	0.0109251	0.0632961	0.0163452	0.0809786	0.0112821		0.00465194	9.32564	1.55277	4.21738	87.0632	88.4844	20.3939	6.62299	11342.9		4.65589	0.0508659	0.0809786	0.000913608	0.930482		1254.24	13.7027	1240.5	20.2762	1220.92	11.0869		29	5	1.4	Spot		28.948	7.10368	30631.3	2414.84	8108.39	115667	132343	847.717	4585.68	6.34691e+07	5.92697e+06	105383	104
2015-329-086	OC07A105	0.311227	0.0114659	0.0801372	0.0195555	0.108729	0.00529158		0.0168862	58.9873	14.9275	25.2212	453.86	437.524	17.1543	372.47	10593.6		3.21309	0.036841	0.108729	0.000575347	0.976578		1746.74	20.0279	1558.12	30.4699	1778.23	4.82648		29	5	1.4	Spot		0.0001	27.0769	231863	24563	53692.7	636079	702495	751.898	270247	6.66407e+07	5.81256e+06	105269	105
2015-329-087	OC07A106	0.322524	0.00966705	0.0919299	0.0141165	0.109384	0.00467805		6.485e-08	46.4201	13.156	13.8313	213.215	353.939	8.42204	45.952	10382.2		3.10055	0.0299731	0.109384	0.000511702	0.982063		1802.04	17.4204	1777.6	25.0934	1789.17	4.26112		29	5	1.4	Spot		29.0195	0.0001	196965	20975.5	29778.8	288679	558435	356.478	31996	6.40797e+07	5.47816e+06	105625	106
2015-329-088	OC07A107	0.207189	0.00986085	0.0547305	0.0146853	0.0814339	0.00600036		6.73538e-08	32.7303	7.60463	30.532	832.283	423.746	20.8315	113.055	12001.7		4.8265	0.0475934	0.0814339	0.000488633	0.926926		1213.83	11.9694	1077.01	15.8162	1231.94	5.88724		29	5	1.4	Spot		24.4617	0.0001	148306	11761.4	66400.1	1.08992e+06	657474	852.479	75635.6	6.16918e+07	6.09719e+06	105509	107
2015-329-089	OC07A108	0.281167	0.0144762	0.0412195	0.0209485	0.101978	0.00887949		0.0121288	24.1937	7.65276	8.809	313.185	231.225	22.4789	190.42	13698.2		3.55661	0.051486	0.101978	0.000905511	0.962052		1597.24	23.1218	816.424	17.1029	1660.43	8.21992		29	5	1.4	Spot		36.2816	13.6803	91474.1	9058.58	15235.2	312993	278251	701.735	96580.2	4.68627e+07	5.28673e+06	104115	108
2015-329-090	OC07A109	0.331879	0.00980867	0.0939273	0.0146171	0.109498	0.00530475		0.00687033	29.2164	10.7569	8.05793	136.449	269.125	5.13121	25.0572	11514.7		3.01314	0.0295549	0.109498	0.000580859	0.986615		1847.48	18.1214	1814.54	26.5234	1791.08	4.83082		29	5	1.4	Spot		81.3048	10.5847	164394	17520.5	19886.5	187105	451423	219.697	17323.1	6.40043e+07	6.07012e+06	104842	109
2015-329-091	OC07A110	0.31341	0.0103074	0.0896012	0.0144486	0.108812	0.00739029		6.47292e-08	9.51171	3.73861	8.65492	159.427	98.7736	18.2161	0.000144549	11972.2		3.19071	0.0328879	0.108812	0.000804151	0.977637		1757.46	18.1149	1734.45	25.0603	1779.62	6.73957		29	5	1.4	Spot		0.51774	0.0001	58077.7	6150.92	22335.1	220203	169471	785.298	0.1	6.41749e+07	6.32865e+06	104726	110
2015-329-092	OC07A111	0.254481	0.00992382	0.071514	0.0152069	0.0912921	0.00546775		6.79483e-08	18.1436	6.39262	8.14843	194.406	245.685	9.94113	28.1951	12256.8		3.92957	0.0389964	0.0912921	0.000499163	0.949266		1461.54	14.5041	1396.11	21.2306	1452.7	5.20193		29	5	1.4	Spot		47.8117	0.0001	113546	10092	20853.5	256942	409463	409.927	18542.6	6.11288e+07	6.17211e+06	104348	111
2015-329-093	OC07A112	0.30407	0.0114993	0.0756123	0.0162922	0.111393	0.00415866		0.0135452	37.9364	17.3401	26.0146	612.74	448.143	23.0527	459.201	10863.7		3.28872	0.0378178	0.111393	0.000463244	0.973109		1711.46	19.6805	1473.27	24.0028	1822.26	3.77267		29	5	1.4	Spot		28.2535	19.3984	247325	26831	67338.3	791577	740813	928.785	293258	5.94792e+07	5.32342e+06	105259	112
2015-329-094	OC07A115	0.32237	0.00982319	0.0882197	0.0185659	0.114508	0.00479937		6.66586e-08	32.4636	17.9013	3.21294	73.6483	423.147	6.68556	135.013	15330.7		3.10203	0.0304718	0.114508	0.000549566	0.981989		1801.29	17.6944	1708.8	31.7254	1872.16	4.32765		29	5	1.4	Spot		66.9816	0.0001	265512	29639.4	9702.01	100991	774302	285.583	89751.7	6.22878e+07	7.86916e+06	105525	115
2015-329-095	OC07A116	0.20602	0.00998872	0.059607	0.014392	0.0821562	0.00808002		0.00701672	6.5531	2.70245	6.57055	221.235	134.365	13.5182	9.16921	11276.3		4.85391	0.0484843	0.0821562	0.000663824	0.926379		1207.58	12.0622	1170.25	16.8422	1249.24	7.90805		29	5	1.4	Spot		43.2283	11.1229	59747	4761.2	21678.1	321965	264450	612.611	6427.16	6.58113e+07	6.11606e+06	105478	116
2015-329-096	OC07A117	0.239805	0.00980259	0.0697923	0.0143677	0.0875049	0.00630529		6.45696e-08	10.0566	4.6206	5.68927	169.642	183.879	4.90188	0.000146333	11260.1		4.17006	0.0408774	0.0875049	0.000551744	0.942286		1385.68	13.5833	1363.61	19.592	1371.64	6.06572		29	5	1.4	Spot		6.59327	0.0001	94247.2	8008.67	18941.6	242251	359786	217.893	0.1	6.42908e+07	5.96666e+06	104400	117
2015-329-098	OC07A119	0.283115	0.0185588	0.083741	0.0213714	0.0993539	0.0240375		5.26343e-08	2.07826	1.19104	2.47617	68.6314	37.0755	19.4946	34.2121	8135.37		3.53213	0.0655522	0.0993539	0.00238822	0.96299		1607.03	29.8246	1625.45	34.738	1612.02	22.3911		29	5	1.4	Spot		56.0053	0.0001	26259.2	2567.5	10757.2	121273	92066.4	1071.48	28559.6	7.88543e+07	5.28833e+06	105097	119
2015-329-099	OC07A120	0.316466	0.0102889	0.0899112	0.0149964	0.110076	0.00717917		0.00300436	5.55717	3.61594	3.9363	97.4879	83.6123	22.0104	13.5453	11299.6		3.1599	0.032512	0.110076	0.000790253	0.97912		1772.45	18.2366	1740.2	26.0967	1800.65	6.53009		29	5	1.4	Spot		14.0645	4.67914	60151.8	6433.38	14437.5	141820	173042	995.594	9249.56	6.46348e+07	6.02117e+06	102871	120
2015-329-100	OC07A121	0.327971	0.0100426	0.0929897	0.0145264	0.107572	0.0052051		6.58761e-08	11.0277	7.29407	6.4162	159.018	166.232	11.7715	64.8896	13368.2		3.04905	0.0306205	0.107572	0.000559922	0.984713		1828.54	18.3634	1797.21	26.1069	1758.69	4.75912		29	5	1.4	Spot		61.8467	0.0001	121356	12734.3	23603.2	226437	340817	521.006	43096.1	6.29918e+07	6.94303e+06	104653	121
2015-326-zr-r2-001	DE22D303	0.228964	0.00804242	0.0665923	0.0141465	0.086552	0.00515914		0.00238851	76.0827	6.59491	7.01974	108.273	348.399	1.03542	9.89294	12930.1		4.3675	0.0351253	0.086552	0.000446534	0.937156		1329.07	10.6889	1303.06	18.4338	1350.54	4.97767		29µm	5	1.72	Spot		63.5368	4.23894	138567	12043.5	12984.7	210709	777115	43.5384	6918.36	6.07367e+07	7.80954e+06	146812	5
2015-326-zr-r2-002	DE22D304	0.293508	0.0116185	0.0856828	0.0143038	0.109152	0.00560403		0.0165876	61.0068	6.65495	13.8738	170.081	217.465	20.487	74.5959	12452.3		3.40707	0.0395849	0.109152	0.000611691	0.968001		1659.03	19.2754	1661.63	23.7676	1785.31	5.107		29µm	5	1.72	Spot		39.7604	26.5212	100096	10948.9	23116.3	298277	437122	776.247	47002.6	5.47505e+07	6.77706e+06	155722	6
2015-326-zr-r2-003	DE22D305	0.313123	0.00825683	0.0883724	0.0134722	0.109145	0.00489649		0.0158385	85.0634	9.27609	14.8101	176.265	284.198	11.0271	22.4361	11248.5		3.19364	0.0263693	0.109145	0.000534429	0.977497		1756.05	14.4994	1711.64	23.0595	1785.2	4.46227		29µm	5	1.72	Spot		0.0001	27.7909	153162	16748.4	27076.6	339335	627104	458.618	15516.2	6.01212e+07	6.71984e+06	154470	7
2015-326-zr-r2-009	DE22D311	0.308855	0.00855293	0.0849196	0.0135832	0.111154	0.0059094		5.96011e-08	43.7022	4.85349	11.2642	138.277	147.353	20.0236	16.5742	10918.7		3.23777	0.0276924	0.111154	0.000656853	0.975427		1735.07	14.8399	1647.42	22.3772	1818.37	5.36345		29µm	5	1.72	Spot		8.64136	0.0001	75229	8379.77	19673.5	254969	311447	797.28	10968	5.76945e+07	6.24487e+06	146685	13
2015-326-zr-r2-010	DE22D312	0.232061	0.00843053	0.0647632	0.0142911	0.0870401	0.00672148		5.91054e-08	60.3669	5.25728	9.82015	158.242	270.762	10.5456	27.1983	10333.5		4.30922	0.036329	0.0870401	0.000585038	0.938619		1345.29	11.3415	1268.37	18.1263	1361.38	6.47529		29µm	5	1.72	Spot		33.4834	0.0001	104784	9153.1	17292.5	294311	577253	423.502	18151.4	5.8213e+07	5.96098e+06	141791	14
2015-326-zr-r2-011	DE22D313	0.344932	0.00935725	0.0936865	0.013934	0.111041	0.00663294		5.77181e-08	39.8523	4.42274	7.60311	84.6407	120.447	22.7783	79.1805	11377.1		2.89912	0.0271278	0.111041	0.000736531	0.992976		1910.35	17.8756	1810.09	25.2218	1816.53	6.02151		29µm	5	1.72	Spot		0.0001	0.0001	70835.4	7885.28	13708.1	161250	263038	936.933	54119.5	5.96479e+07	6.72215e+06	141227	15
2015-326-zr-r2-013	DE22D319	0.320453	0.00821135	0.0882259	0.0143755	0.110049	0.00445092		5.81804e-08	109.813	12.0835	18.7775	223.737	356.497	7.44896	78.1154	12754.9		3.12059	0.0256242	0.110049	0.000489818	0.981057		1791.94	14.7142	1708.92	24.5666	1800.21	4.04872		29µm	5	1.72	Spot		37.7041	0.0001	193599	21373.1	33554.1	423564	773695	304.331	53004.1	5.93867e+07	7.48557e+06	134948	21
2015-326-zr-r2-015	DE22D321	0.334414	0.00925756	0.0941302	0.0164617	0.110988	0.00497251		0.00316158	92.7333	10.2942	22.7332	254.681	289.061	14.4071	74.4701	10300.1		2.9903	0.0276829	0.110988	0.000551891	0.987849		1859.74	17.2167	1818.29	29.932	1815.66	4.51462		29µm	5	1.72	Spot		59.3571	5.26615	158425	17645.6	39354.5	467503	608305	570.651	48980.2	5.76202e+07	5.86051e+06	137572	23
2015-326-zr-r2-016	DE22D322	0.254065	0.00914639	0.0715616	0.014659	0.094066	0.00683448		0.000362527	44.5945	4.19688	7.95236	115.081	181.937	4.94374	0.000147832	12137.4		3.93599	0.0360001	0.094066	0.000642893	0.949068		1459.41	13.3483	1397.01	20.4787	1509.44	6.45282		29µm	5	1.72	Spot		62.9101	0.62097	78342.6	7398.03	14154.8	217298	393842	201.409	0.1	5.92894e+07	7.10317e+06	136134	24
2015-326-zr-r2-017	DE22D323	0.625256	0.0088064	0.165116	0.0142522	0.239379	0.00398982		5.73941e-08	57.1975	13.6918	8.21768	51.4921	95.2141	7.52504	32.4458	9090.59		1.59934	0.0140845	0.239379	0.000955079	1.12241		3130.8	27.5711	3088.84	44.0226	3115.85	3.17593		29µm	5	1.72	Spot		0.0001	0.0001	102207	24550.1	14876.1	98927.2	209716	311.905	22327.6	6.03448e+07	5.41267e+06	133768	25
2015-326-zr-r2-018	DE22D324	0.287802	0.00933525	0.0722827	0.015681	0.108205	0.00687176		6.98333e-08	72.079	7.79794	10.4036	145.881	250.673	9.69203	65.7394	13482.8		3.47461	0.0324363	0.108205	0.000743562	0.965248		1630.54	15.2215	1410.61	22.1198	1769.42	6.27462		29µm	5	1.72	Spot		0.0001	0.0001	105853	11491.6	15475.9	230409	453911	330.234	37184.8	4.96256e+07	6.59926e+06	137646	26
2015-326-zr-r2-019	DE22D325	0.228705	0.0102033	0.0664574	0.0150115	0.0909043	0.007491		0.00314614	93.6333	8.52278	22.9434	368.942	444.976	13.7743	194.637	9938.33		4.37244	0.0446134	0.0909043	0.000680964	0.937034		1327.71	13.5471	1300.5	19.5225	1444.6	7.13465		29µm	5	1.72	Spot		44.8464	6.19218	188991	17262.9	46901.8	801143	1.10778e+06	645.198	151336	6.82489e+07	6.68724e+06	136365	27
2015-326-zr-r2-020	DE22D326	0.327099	0.00868704	0.0896351	0.0142158	0.108831	0.00721152		0.00531435	37.5152	4.09234	8.73475	101.193	119.264	13.0931	6.98401	10341.6		3.05717	0.0265578	0.108831	0.000784837	0.984289		1824.31	15.8478	1735.08	24.6656	1779.94	6.57627		29µm	5	1.72	Spot		31.9712	9.01368	65251.4	7143.19	15385	189413	255942	528.616	4680.16	5.88495e+07	5.99787e+06	142095	28
2015-326-zr-r2-021	DE22D327	0.229012	0.00877434	0.0650648	0.0140455	0.0919626	0.00758183		0.00421131	49.366	4.55356	8.73557	137.039	218.777	10.5888	25.2206	12098.5		4.36659	0.0383139	0.0919626	0.000697245	0.937179		1329.32	11.6639	1274.09	17.8952	1466.61	7.19968		29µm	5	1.72	Spot		9.66195	7.04705	84710.1	7841.74	15177.8	253141	463339	421.865	16676.3	5.80954e+07	6.92421e+06	142256	29
2015-326-zr-r2-022	DE22D328	0.320806	0.0105511	0.0925355	0.0159075	0.109088	0.00955622		0.00303154	32.1694	3.4982	6.55765	75.0933	106.895	18.5418	8.11783	10141.5		3.11715	0.0328894	0.109088	0.00104247	0.981228		1793.66	18.9251	1788.8	28.4554	1784.24	8.70981		29µm	5	1.72	Spot		0.0001	5.65658	61551.2	6717.51	12702.7	154719	252512	823.888	5985.99	6.48192e+07	6.47339e+06	137982	30
2015-326-zr-r2-023	DE22D329	0.220747	0.0127501	0.0695088	0.0170387	0.0877837	0.0153101		0.0196708	17.4547	1.52984	5.78099	88.8657	85.3045	22.5755	491.255	10198.9		4.53007	0.0577586	0.0877837	0.00134398	0.933284		1285.82	16.3943	1358.25	23.1428	1377.75	14.7159		29µm	5	1.72	Spot		662.711	34.6962	31568.9	2777.03	10583.9	173128	190543	948.442	342470	6.13104e+07	6.15521e+06	132879	31
2015-326-zr-r2-025	DE22D331	0.330698	0.00866128	0.0940367	0.0144037	0.113511	0.00574584		6.18388e-08	77.4028	8.78881	11.1486	120.411	236.136	10.0732	14.5678	12340.1		3.02391	0.0261909	0.113511	0.000652214	0.98604		1841.76	15.952	1816.56	26.1652	1856.37	5.19097		29µm	5	1.72	Spot		16.4859	0.0001	128339	14626.8	18707.1	215191	483860	388.15	9313.04	5.6278e+07	6.83078e+06	131704	33
2015-326-zr-r2-027	DE22D333	0.315007	0.00811103	0.0765809	0.0151298	0.113392	0.00417678		0.0143113	98.2777	11.1523	10.2596	137.644	323.149	12.297	158.437	12021.9		3.17453	0.0257487	0.113392	0.000473613	0.978412		1765.3	14.3184	1491.46	22.5656	1854.47	3.7743		29µm	5	1.72	Spot		0.0001	24.5185	172624	19663.6	18232.5	260755	701925	502.207	107333	5.96948e+07	7.0531e+06	136300	35
2015-326-zr-r2-028	DE22D338	0.230358	0.00872832	0.0651548	0.0140454	0.0881877	0.00710035		0.00712873	39.0407	3.43481	8.88137	139.347	174.265	37.4428	325.155	9492.67		4.34108	0.0378903	0.0881877	0.000626164	0.937814		1336.37	11.6643	1275.8	17.9192	1386.58	6.81648		29µm	5	1.72	Spot		0.0001	12.1275	68083.2	6013.96	15659.9	262503	376431	1520.01	218860	5.94561e+07	5.53605e+06	134475	40
2015-326-zr-r2-029	DE22D339	0.298252	0.0104617	0.0839805	0.0156878	0.10884	0.00669657		0.00382456	45.2286	4.92274	11.3565	138.504	155.118	24.2056	53.843	10432.6		3.35286	0.0350765	0.10884	0.000728856	0.970294		1682.64	17.6032	1629.91	25.5697	1780.09	6.10657		29µm	5	1.72	Spot		0.0001	6.46154	78328	8559.77	19882.8	259189	332860	976.068	35995.9	5.9082e+07	6.04357e+06	140938	41
2015-326-zr-r2-031	DE22D341	0.282275	0.0090433	0.0801297	0.0136964	0.09954	0.00813421		0.00688151	34.0254	3.38741	11.7012	148.868	123.783	11.0963	3.01537	10182.3		3.54264	0.0320371	0.09954	0.00080968	0.962586		1602.81	14.4947	1557.98	21.3388	1615.5	7.57366		29µm	5	1.72	Spot		0.0001	11.6129	58854.6	5883.41	20456.1	278423	265474	447.121	2014.05	5.90858e+07	5.89428e+06	146168	43
2015-326-zr-r2-032	DE22D342	0.306343	0.00851702	0.0879994	0.0129488	0.109047	0.00521935		6.01462e-08	80.6771	8.79549	26.3086	306.354	271.75	510.551	162.101	11674.6		3.26432	0.0278023	0.109047	0.000569154	0.97421		1722.68	14.6721	1704.71	22.0739	1783.56	4.75746		29µm	5	1.72	Spot		85.1542	0.0001	137483	15050.8	45305.7	564659	574374	20272.7	106685	5.82483e+07	6.6597e+06	149895	44
2015-326-zr-r2-033	DE22D343	0.317337	0.00943173	0.094013	0.0159337	0.108571	0.00894783		0.00469899	25.3653	2.75844	4.10122	44.5252	82.9733	12.0164	6.48765	11164.8		3.15122	0.0297215	0.108571	0.000971479	0.979543		1776.71	16.7575	1816.12	28.9375	1775.58	8.16404		29µm	5	1.72	Spot		0.0001	7.86348	43505.4	4751	7107.48	82624.8	176568	480.346	4298.07	5.86632e+07	6.41174e+06	150278	45
2015-326-zr-r2-034	DE22D344	0.227357	0.00915586	0.0657499	0.0159516	0.0868008	0.010552		6.02728e-08	22.324	1.93642	4.80423	74.839	100.996	11.4299	9.45162	11205		4.39837	0.0402709	0.0868008	0.000915921	0.936398		1320.63	12.0915	1287.09	20.5311	1356.08	10.173		29µm	5	1.72	Spot		0.0001	0.0001	37960.3	3306.68	8253.21	137729	213144	453.086	6208.88	5.81967e+07	6.3811e+06	150127	46
2015-326-zr-r2-035	DE22D345	0.254638	0.0101907	0.0666674	0.0169469	0.091875	0.00642154		0.00198774	59.0108	5.41427	6.8984	105.286	237.852	26.9098	114.054	12268.4		3.92714	0.0400205	0.091875	0.000589979	0.949341		1462.35	14.9024	1304.48	22.107	1464.8	6.09936		29µm	5	1.72	Spot		0.0001	3.25082	98907.6	9113.58	11679.7	191050	494950	1051.71	73862.2	5.74007e+07	6.88844e+06	146369	47
2015-326-zr-r2-036	DE22D346	0.287028	0.00886069	0.0829098	0.015327	0.110256	0.00767141		0.0157884	39.2605	4.3238	8.72013	107.892	141.015	15.63	94.8663	10359.2		3.48399	0.0308705	0.110256	0.000845818	0.964875		1626.66	14.4133	1609.94	24.6755	1803.63	6.97527		29µm	5	1.72	Spot		35.1236	21.9645	55974.7	6191.12	12557	166586	249691	519.74	52267.2	4.88577e+07	4.94883e+06	142414	48
2015-326-zr-r2-037	DE22D347	0.209538	0.00939129	0.0628841	0.0156227	0.0822054	0.0106591		0.00143656	18.3696	1.50653	4.14097	67.3229	90.0748	13.917	1.8054	10107.1		4.7724	0.044819	0.0822054	0.000876233	0.928025		1226.36	11.5171	1232.66	19.2576	1250.41	10.4305		29µm	5	1.72	Spot		14.8004	2.35745	30892.6	2544.58	7032.77	122651	188193	546.005	1173.48	5.76677e+07	5.69681e+06	144015	49
2015-326-zr-r2-038	DE22D348	0.331352	0.00858893	0.0958197	0.0145879	0.110507	0.00636797		6.32574e-08	46.5489	5.14805	8.53244	90.5334	144.659	77.7659	1001.28	11652.2		3.01794	0.0259208	0.110507	0.000703705	0.986358		1844.93	15.846	1849.47	26.9799	1807.76	5.78718		29µm	5	1.72	Spot		27.1336	0.0001	75408.6	8376.35	13957.1	158932	291236	2939.69	627018	5.55861e+07	6.32806e+06	142948	50
2015-326-zr-r2-040	DE22D350	0.302673	0.0108226	0.0832547	0.0147086	0.109244	0.00683109		0.0182822	111.37	12.145	53.9909	683.821	400.809	121.439	240.582	10900.3		3.30389	0.0357565	0.109244	0.000746257	0.972433		1704.55	18.4476	1616.37	23.7746	1786.85	6.22405		29µm	5	1.72	Spot		0.0001	35.3275	220519	24155.1	107918	1.46822e+06	986946	5613.69	184199	6.80286e+07	7.23906e+06	143628	52
2015-329-001	OC07A348	0.327545	0.0105091	0.0928788	0.015332	0.108442	0.00771328		0.0051102	0.459825	1.24944	0.434069	40.371	15.6236	11.6652	45.3634	11323.7		3.05302	0.0320845	0.108442	0.000836446	0.984505		1826.47	19.1946	1795.16	27.5234	1773.41	7.03952		29	5	1.4	Spot		54.4105	7.96222	52863.8	5583.94	11915.6	114860	150795	989.101	16250.8	6.32925e+07	6.02657e+06	92487.1	348
2015-329-002	OC07A349	0.418743	0.0136035	0.118727	0.0183458	0.148712	0.00822575		0.0417975	2.05175	7.67565	1.26978	89.3449	52.3363	9.15781	333.151	12356		2.3881	0.0324866	0.148712	0.00122327	1.02899		2254.77	30.6729	2267.63	41.6016	2331.16	7.04376		29	5	1.4	Spot		0.0001	48.4681	176232	25595.9	26038	189579	377207	579.053	88476.4	4.71001e+07	4.89402e+06	94649.3	349
2015-329-003	OC07A350	0.359632	0.00981313	0.0993493	0.0143211	0.11961	0.00496593		0.00906065	1.27344	3.83532	0.824972	71.7617	39.4886	3.90748	15.6638	10116.8		2.78062	0.0272866	0.11961	0.000593976	1.00015		1980.43	19.4342	1914.47	27.4174	1950.41	4.43632		29	5	1.4	Spot		32.0564	14.2172	148582	17351	22976	206477	386416	334.996	5607.04	6.37282e+07	5.42224e+06	93429.5	350
2015-329-004	OC07A351	0.328194	0.0110112	0.09066	0.0162686	0.10879	0.00621639		5.76701e-08	1.05026	2.87773	0.544923	53.78	36.8301	3.51557	8.59059	12402.1		3.04698	0.033551	0.10879	0.000676282	0.984821		1829.62	20.1464	1754.08	28.5364	1779.26	5.66928		29	5	1.4	Spot		92.4581	0.0001	135942	14423.8	16833.1	171355	399606	333.732	3384.89	7.04182e+07	7.34551e+06	95270	351
2015-329-005	OC07A352	0.310419	0.0102055	0.0867198	0.0161806	0.105206	0.00642441		0.0188489	0.807322	2.13578	0.344135	34.4524	28.9724	2.95777	0.866558	10639.7		3.22145	0.0328765	0.105206	0.000675888	0.976186		1742.77	17.7858	1680.93	27.1984	1717.92	5.90399		29	5	1.4	Spot		0.0001	29.2238	93792.5	9596.19	9540.1	98356.1	282008	251.553	304.094	6.29572e+07	5.63447e+06	95187.2	352
2015-329-007	OC07A354	0.336425	0.0123595	0.0976303	0.0175667	0.106284	0.00888803		0.0146133	1.28931	3.45465	0.596781	50.0522	39.9385	4.33533	41.337	10596.4		2.97243	0.0367377	0.106284	0.000944658	0.988829		1869.45	23.1054	1882.84	33.0754	1736.64	8.14888		29	5	1.4	Spot		42.3412	17.7928	118531	12251.9	13087.4	112681	307320	290.705	11301.8	4.94322e+07	4.40679e+06	97865.7	354
2015-329-008	OC07A355	0.331381	0.0100749	0.0961433	0.014603	0.108784	0.00654027		0.00889477	0.671248	1.8541	0.614132	55.8031	22.6772	7.1679	2.49551	10527.1		3.01767	0.0304027	0.108784	0.000711475	0.986373		1845.07	18.5889	1855.44	27.095	1779.15	5.96474		29	5	1.4	Spot		34.9964	14.0851	80562.4	8573.59	17579.3	163724	227692	626.336	883.819	6.42832e+07	5.69372e+06	99175.9	355
2015-329-009	OC07A356	0.327823	0.0125067	0.0983236	0.01606	0.114469	0.0066666		0.00237674	1.42246	4.13269	0.659952	60.8654	50.4688	3.68543	108.882	9470.73		3.05043	0.0381508	0.114469	0.000763119	0.984641		1827.82	22.86	1895.6	30.4435	1871.54	6.0118		29	5	1.4	Spot		32.0674	4.29029	195348	21839.5	21612.4	203986	579546	367.824	43782.5	7.32719e+07	5.83914e+06	98091.5	356
2015-329-010	OC07A357	0.332446	0.00989534	0.0983921	0.0175052	0.111849	0.00487673		0.000250499	1.15046	3.26842	0.195822	17.3874	38.4729	3.47564	15.474	13941		3.00801	0.0297652	0.111849	0.000545459	0.986891		1850.23	18.3086	1896.87	33.205	1829.68	4.42008		29	5	1.4	Spot		41.6039	0.397244	139321	15212.2	5654.09	51298.4	389393	305.343	5444.4	6.43643e+07	7.551e+06	96248.5	357
2015-329-011	OC07A358	0.302684	0.00977864	0.0875301	0.0145816	0.103197	0.00486695		6.29916e-08	1.25725	3.29906	0.55949	56.3084	46.4671	3.21666	30.0428	10809.6		3.30378	0.0323064	0.103197	0.000502254	0.972438		1704.6	16.6687	1695.99	24.7303	1682.4	4.49283		29	5	1.4	Spot		67.5388	0.0001	152990	15410	16229.9	166648	472348	283.449	10539	6.44274e+07	5.86115e+06	96994.1	358
2015-329-012	OC07A359	0.256022	0.013266	0.0797752	0.0224067	0.0957558	0.0142122		0.0429096	0.911162	2.22509	0.70561	71.4606	36.985	3.87781	252.815	13050		3.90592	0.051816	0.0957558	0.0013609	0.950001		1469.46	19.4939	1551.35	34.7606	1542.99	13.3589		29	5	1.4	Spot		0.658996	45.9301	75038	7025.48	13850.5	142892	254320	230.851	59556.5	4.34366e+07	4.77095e+06	95810.3	359
2015-329-013	OC07A360	0.310983	0.0102917	0.0921245	0.0143468	0.110832	0.00468167		0.0101821	1.31542	3.72024	0.786927	75.3357	47.6794	10.6578	234.534	11759.7		3.21561	0.0330942	0.110832	0.000518881	0.976459		1745.54	17.9647	1781.2	25.5546	1813.11	4.25189		29	5	1.4	Spot		18.9472	15.7289	156921	16994.5	22371.9	217847	474692	917.452	79412	6.2681e+07	6.20452e+06	95018.5	360
2015-329-014	OC07A361	0.341302	0.0103963	0.0968705	0.0154843	0.111625	0.0056687		0.000381281	0.79729	2.27153	0.469918	42.77	26.2105	5.78707	3.63881	11387.7		2.92996	0.0304608	0.111625	0.000632768	0.991206		1892.93	19.6795	1868.85	28.9378	1826.04	5.14018		29	5	1.4	Spot		43.7803	0.584163	94682.1	10317.3	13297	122914	259648	495.045	1217	6.21615e+07	5.95895e+06	94162.6	361
2015-329-016	OC07A363	0.298306	0.010921	0.0942768	0.014522	0.114844	0.00426734		0.129608	2.72676	7.99216	2.32301	219.53	103.18	24.36	1730.03	11600.9		3.35226	0.03661	0.114844	0.00049008	0.97032		1682.9	18.379	1820.99	26.4444	1877.44	3.84547		29	5	1.4	Spot		6.39021	181.557	298254	33355.1	60525.6	579179	940558	1912.68	524701	5.68242e+07	5.55024e+06	93060.1	363
2015-329-017	OC07A364	0.331617	0.010217	0.0929674	0.0156673	0.110376	0.00620519		6.24754e-08	0.623407	1.76407	0.293034	28.0049	21.1152	2.48138	14.1278	11933.7		3.01553	0.0308095	0.110376	0.000684904	0.986487		1846.21	18.8627	1796.79	28.1509	1805.61	5.64073		29	5	1.4	Spot		35.5906	0.0001	78200.3	8433.32	8754.63	84594.3	220640	223.053	4875.82	6.49235e+07	6.52382e+06	92901.7	364
2015-329-018	OC07A365	0.312149	0.0109117	0.0960238	0.0143645	0.110577	0.00503366		0.0122753	1.55202	4.39388	0.813526	74.332	55.4501	4.65871	248.503	12842.7		3.2036	0.0349567	0.110577	0.000556605	0.977025		1751.27	19.1093	1853.24	26.6207	1808.91	4.57392		29	5	1.4	Spot		0.0001	18.4267	183249	19748.3	22873.6	211002	545129	393.5	80099	6.08817e+07	6.58424e+06	92638	365
2015-329-021	OC07A368	0.364191	0.00990267	0.105048	0.0146031	0.123989	0.00522361		0.019927	2.26587	7.22014	1.17443	95.2633	66.7236	4.14396	157.791	11852.6		2.74581	0.0271909	0.123989	0.000647672	1.00238		2002.01	19.8252	2018.97	29.4832	2014.41	4.63184		29	5	1.4	Spot		0.0001	28.1571	254577	30772.1	31407.7	256086	623344	331.384	47278.2	5.72922e+07	5.71981e+06	96218.4	368
2015-329-023	OC07A372	0.262536	0.010745	0.0770142	0.0143471	0.0913957	0.00839401		0.0273054	0.483106	1.14294	0.567911	65.8326	20.7046	10.5513	44.693	10205.1		3.809	0.0409277	0.0913957	0.000767177	0.953113		1502.8	16.1476	1499.6	21.5148	1454.86	7.9836		29	5	1.4	Spot		0.0001	42.5794	60761.9	5428.39	16992.1	196868	216149	938.309	14529.7	6.32034e+07	5.43475e+06	94699.6	372
2015-329-027	OC07A376	0.31077	0.0108168	0.086264	0.0145236	0.110018	0.00554934		6.52724e-08	1.15719	3.30873	0.946525	98.671	41.8556	9.12129	72.3604	11637.8		3.21781	0.0348063	0.110018	0.000610527	0.976356		1744.5	18.8698	1672.45	24.29	1799.7	5.0482		29	5	1.4	Spot		12.2393	0.0001	145017	15588.8	28202.1	292202	434630	802.981	22717	6.20724e+07	6.08893e+06	91957.9	376
2015-329-028	OC07A377	0.309634	0.0101699	0.0899961	0.0162265	0.103224	0.00638932		6.49971e-08	0.747455	2.0034	0.33552	33.6564	27.2056	4.24036	2.50427	12890.8		3.22962	0.0328447	0.103224	0.000659529	0.975805		1738.91	17.6844	1741.77	28.2629	1682.88	5.89782		29	5	1.4	Spot		3.00043	0.0001	94394.9	9501.58	10072.9	100288	284570	375.582	786.094	6.23295e+07	6.77304e+06	91211.7	377
2015-329-029	OC07A378	0.302212	0.0122255	0.0557514	0.0264141	0.113419	0.00895997		0.0108413	0.971216	2.8657	0.448792	80.2088	38.6798	8.31672	82.6722	12558.6		3.30894	0.0404534	0.113419	0.00101623	0.97221		1702.27	20.8111	1096.57	28.9649	1854.91	8.09615		29	5	1.4	Spot		50.7812	19.3699	142931	15821.1	15699	278099	471282	857.061	30005	7.2376e+07	7.66269e+06	91510.4	378
2015-329-030	OC07A379	0.345459	0.0105967	0.0977747	0.0150404	0.115639	0.00604903		6.48198e-08	0.732957	2.20388	0.47265	43.8426	24.0235	5.99483	0.000320499	10759		2.8947	0.0306742	0.115639	0.000699506	0.993233		1912.88	20.2702	1885.5	28.3586	1889.87	5.4429		29	5	1.4	Spot		3.00557	0.0001	93462.5	10531.1	14323.7	131513	253512	534.438	0.1	6.24885e+07	5.66831e+06	90199.2	379
2015-329-032	OC07A381	0.313709	0.0101249	0.0879641	0.016325	0.105267	0.00564032		0.00139191	0.875339	2.40454	0.298365	30.8031	31.5972	5.75032	8.16088	12526.7		3.18767	0.0322748	0.105267	0.000593739	0.977782		1758.93	17.809	1704.06	27.8188	1718.98	5.18272		29	5	1.4	Spot		29.4458	2.18028	114112	11721.7	9241.52	94183.9	340605	522.453	2562.6	6.34351e+07	6.70073e+06	90150	381
2015-329-035	OC07A384	0.290769	0.0133964	0.0825162	0.0163317	0.102828	0.0113051		7.24951e-08	0.447396	1.20426	0.650419	68.4937	16.5295	5.63099	4.71049	8992.45		3.43915	0.0460721	0.102828	0.00116248	0.966679		1645.37	22.042	1602.59	26.173	1675.78	10.4449		29	5	1.4	Spot		10.976	0.0001	51889.3	5206.38	17916.3	185504	158330	453.058	1285.23	5.58468e+07	4.23589e+06	90873.9	384
2015-329-036	OC07A385	0.330167	0.00982632	0.092558	0.0162094	0.110268	0.00489544		0.00786117	1.0864	3.13626	0.250071	24.5007	37.0927	3.81634	14.8733	12507.1		3.02877	0.0297617	0.110268	0.000539809	0.985781		1839.19	18.0725	1789.22	29.0022	1803.82	4.4511		29	5	1.4	Spot		65.4178	12.5935	146829	15783.9	8025.99	77212.7	413862	357.263	4691.69	6.48523e+07	6.84207e+06	91904.5	385
2015-329-041	OC07A390	0.303916	0.0100243	0.0866493	0.0147317	0.102933	0.00523453		0.0106344	1.03315	2.79638	0.51284	54.2492	38.4681	2.63661	38.4489	10808.1		3.29038	0.0329839	0.102933	0.000538805	0.973035		1710.7	17.1486	1679.61	24.7436	1677.67	4.83506		29	5	1.4	Spot		28.4735	16.8975	140834	14122.2	16590.5	171210	432049	247.079	11758.3	6.42943e+07	5.86426e+06	92010.2	390
2015-329-042	OC07A391	0.284041	0.00991719	0.0804256	0.0144071	0.0969311	0.00607314		6.52068e-08	0.77596	1.9822	0.827143	94.8599	31.1044	8.96773	133.764	12172.5		3.52062	0.0349146	0.0969311	0.000588676	0.963436		1611.68	15.9834	1563.52	22.5257	1565.88	5.69133		29	5	1.4	Spot		71.4441	0.0001	102428	9684.04	25908.4	289499	338163	812.582	39299.7	6.20486e+07	6.37441e+06	91640.3	391
2015-329-043	OC07A394	0.326596	0.0104915	0.0934904	0.0147165	0.110863	0.00710537		6.40735e-08	0.424076	1.24121	0.45607	45.1768	14.7767	4.27514	1.31791	11055.4		3.06188	0.0321238	0.110863	0.000787724	0.984044		1821.86	19.1141	1806.46	26.5848	1813.61	6.45269		29	5	1.4	Spot		51.1143	0.0001	57534	6213.92	14676.8	141115	164925	396.393	388.572	6.31286e+07	5.89172e+06	93748	394
2015-329-045	OC07A396	0.321815	0.00995076	0.0923476	0.0144937	0.108354	0.00502045		0.00581819	1.15735	3.31955	0.619734	62.042	40.8629	1.62263	345.853	12257.5		3.10738	0.0309208	0.108354	0.000543984	0.981719		1798.59	17.8973	1785.33	25.876	1771.92	4.58275		29	5	1.4	Spot		73.8514	9.2185	160446	16948.6	20374.4	197488	465690	153.293	102548	6.40762e+07	6.63153e+06	92447.5	396
2015-329-046	OC07A397	0.322552	0.0111566	0.0962367	0.0166058	0.110746	0.00488501		6.22597e-08	0.904094	2.65468	0.285037	27.3261	31.7067	5.49962	76.7178	12034.2		3.10028	0.0345886	0.110746	0.000540996	0.982077		1802.18	20.1063	1857.16	30.8396	1811.69	4.43733		29	5	1.4	Spot		30.1947	0.0001	127470	13771.3	9529.25	88342.7	367356	527.644	22950.3	6.49497e+07	6.60008e+06	92183.4	397
2015-329-047	OC07A398	0.31704	0.0104328	0.0856872	0.0172536	0.110617	0.00651153		6.31655e-08	0.595067	1.74414	0.31469	34.164	21.342	6.23293	43.2893	11455.8		3.15417	0.0329068	0.110617	0.000720285	0.979399		1775.26	18.5209	1661.71	28.6705	1809.57	5.91632		29	5	1.4	Spot		70.0074	0.0001	82964.3	8938.35	10402.1	109070	244424	590.489	12703.6	6.40124e+07	6.19265e+06	92445.6	398
2015-329-048	OC07A399	0.336118	0.0106413	0.0965958	0.0140682	0.113447	0.00462448		0.00849965	1.13511	3.42095	0.707745	68.1758	38.5506	2.57778	30.941	10012.4		2.97515	0.0316596	0.113447	0.000524634	0.988679		1867.97	19.8777	1863.78	26.2201	1855.35	4.17841		29	5	1.4	Spot		19.0352	13.7062	161718	17897.9	23903.3	222117	450999	249.198	9204.36	6.51959e+07	5.51292e+06	93125.5	399
2015-329-050	OC07A401	0.310936	0.0129745	0.10256	0.0159401	0.113618	0.00767114		0.0152463	0.795425	2.40484	0.559838	52.7803	30.2917	4.53402	82.4299	11487.3		3.2161	0.0417271	0.113618	0.000871578	0.976437		1745.31	22.6445	1973.42	31.4565	1858.07	6.92892		29	5	1.4	Spot		49.1495	27.7873	128905	14284.6	21502.7	195081	402813	497.174	27448.2	7.36724e+07	7.14862e+06	93275.8	401
2015-329-053	OC07A404	0.309685	0.0137592	0.0925615	0.0166584	0.10482	0.00745359		0.00910413	1.34557	3.76598	0.935137	88.8712	46.5646	4.75482	784.575	10361.1		3.22909	0.0444296	0.10482	0.000781286	0.97583		1739.15	23.9293	1789.29	29.8066	1711.16	6.85564		29	5	1.4	Spot		24.3312	10.0904	133878	13695.3	22043.8	200873	379752	318.769	156562	4.47892e+07	3.92095e+06	93210.8	404
2015-329-054	OC07A405	0.307425	0.0108891	0.085142	0.0146776	0.107624	0.00522392		6.59388e-08	1.17189	3.37393	0.617181	68.2082	43.8246	5.25793	104.343	12010		3.25283	0.0354202	0.107624	0.000562221	0.974734		1728.02	18.8165	1651.56	24.241	1759.58	4.7758		29	5	1.4	Spot		41.4424	0.0001	160047	16826.2	19968	211346	490423	483.192	28350.6	6.12805e+07	6.21888e+06	92837.5	405
2015-329-055	OC07A406	0.323989	0.0102201	0.0904392	0.016797	0.110622	0.00520732		6.16976e-08	0.954791	2.82717	0.237853	24.1405	33.3475	4.97789	32.4532	12972.6		3.08652	0.0315446	0.110622	0.000576043	0.982776		1809.18	18.4901	1749.99	29.3945	1809.65	4.73128		29	5	1.4	Spot		44.1722	0.0001	139801	15102.3	8249.37	80090.4	399947	489.772	9377.27	6.54869e+07	7.17905e+06	93735.9	406
2015-329-057	OC07A408	0.306291	0.010243	0.0856131	0.0150947	0.104056	0.00702249		6.16763e-08	0.496037	1.38493	0.401022	44.2247	18.5483	6.23045	19.4442	11067.8		3.26487	0.0334422	0.104056	0.00073073	0.974185		1722.43	17.6429	1660.33	25.0623	1697.68	6.47012		29	5	1.4	Spot		21.3912	0.0001	73111.6	7433.56	13997.6	147317	223776	615.399	5564.45	6.54974e+07	6.12697e+06	92509.1	408
2015-329-058	OC07A409	0.314995	0.00975083	0.0875606	0.0140217	0.106477	0.00560833		0.00396033	0.722843	2.0599	0.752747	80.8667	26.2425	9.26542	13.8997	9793.58		3.17465	0.0309555	0.106477	0.000597157	0.978406		1765.24	17.2126	1696.56	23.7885	1739.96	5.13979		29	5	1.4	Spot		11.9912	6.34621	105626	10951.6	26045.9	266722	313776	906.09	3911.62	6.4727e+07	5.35825e+06	92349.8	409
2015-329-059	OC07A410	0.297012	0.0104531	0.0919275	0.0212343	0.10322	0.00766565		0.00816209	1.0495	2.90172	0.144972	15.8377	42.102	3.61107	22.3789	13361.2		3.36687	0.0351942	0.10322	0.000791245	0.969694		1676.47	17.5243	1777.55	37.7451	1682.81	7.07603		29	5	1.4	Spot		0.0001	14.9343	175655	17654	5744.82	59755.4	576391	403.931	7154.76	7.39001e+07	8.34686e+06	93303.6	410
2015-329-060	OC07A411	0.323154	0.00997709	0.0890791	0.01556	0.109141	0.00687436		6.01626e-08	0.408933	1.19562	0.259182	27.484	14.5257	9.10101	3.57411	11648.4		3.0945	0.0308741	0.109141	0.000750271	0.98237		1805.11	18.0098	1724.76	26.8373	1785.12	6.2648		29	5	1.4	Spot		15.3282	0.0001	62368.1	6622.58	9358.02	94374.1	181149	926.439	1032.78	6.71267e+07	6.61046e+06	94110.3	411
2015-329-061	OC07A412	0.339472	0.0117662	0.0999047	0.0176869	0.109546	0.0096434		0.00208926	0.662489	1.95125	0.491357	43.4971	20.8599	2.99265	25.9454	11235.7		2.94575	0.0346604	0.109546	0.00105639	0.990314		1884.13	22.1691	1924.68	34.0417	1791.87	8.781		29	5	1.4	Spot		45.2013	2.55823	74662.6	7979.45	13108.2	110231	192168	224.812	5494.9	4.94457e+07	4.69715e+06	93548.9	412
2015-329-062	OC07A413	0.306714	0.0102526	0.0875431	0.0166969	0.103826	0.00713927		6.342e-08	0.333228	0.929879	0.185402	20.017	12.4193	8.34022	23.3113	12534.6		3.26036	0.0334272	0.103826	0.000741245	0.97439		1724.52	17.6808	1696.23	28.3218	1693.62	6.5811		29	5	1.4	Spot		37.4685	0.0001	48509.7	4907.55	6388.17	65442.6	147735	808.219	6325.07	6.36672e+07	6.748e+06	95386.5	413
2015-329-064	OC07A415	0.333484	0.00964799	0.0943359	0.0147445	0.11245	0.00577877		6.14122e-08	0.747655	2.26101	0.585725	59.5323	25.7821	6.12057	22.7765	11482.3		2.99864	0.0289309	0.11245	0.00064982	0.987396		1855.25	17.8994	1822.09	26.8657	1839.38	5.23148		29	5	1.4	Spot		1.43076	0.0001	113088	12376.8	20964.9	201729	318452	614.658	6316.43	6.57366e+07	6.38341e+06	92146.7	415
2015-493-Zr-002	DE14B237	0.349382	0.0135661	0.0305328	0.0426354	0.115236	0.00841476		0.0217879	68.6755	7.91077	1.05382	37.806	201.006	10.7923	89.4384	14713.3		2.86219	0.0388289	0.115236	0.000969681	0.995147		1931.65	26.205	607.902	25.9182	1883.57	7.57729		29µm	5Hz	1.4m	Spot		63.4034	27.1957	87721.3	10153.3	1365.44	51481.7	322430	307.116	41793.9	4.14505e+07	6.11925e+06	74648	162
2015-493-Zr-003	DE14B238	0.334991	0.0112939	0.0921379	0.013936	0.114659	0.0059614		0.0146608	64.1875	7.34099	9.19589	105.685	198.384	15.8347	9.38895	10602.7		2.98516	0.033714	0.114659	0.000683531	0.98813		1862.53	21.0351	1781.45	24.8262	1874.54	5.37392		29µm	5Hz	1.4m	Spot		0.0001	22.4375	100530	11552.9	14610	176463	390197	552.499	5379.74	5.08197e+07	5.40673e+06	73316.5	163
2015-493-Zr-004	DE14B239	0.307986	0.0134409	0.0928673	0.0168983	0.101771	0.0108668		0.0123223	35.3267	3.58835	12.5029	144.83	122.947	14.9925	6.83287	9890.99		3.2469	0.0436412	0.101771	0.00110592	0.975007		1730.79	23.2634	1794.94	30.3315	1656.67	10.0644		29µm	5Hz	1.4m	Spot		0.0001	19.7273	57877.9	5907.53	20780	252972	252971	547.215	4095.7	5.3157e+07	5.2761e+06	70512.4	164
2015-493-Zr-005	DE14B240	0.30928	0.012005	0.076343	0.0175093	0.111699	0.00734491		0.028902	85.9187	9.60347	12.672	178.741	295.477	22.3126	58.5145	11699.2		3.23331	0.038816	0.111699	0.00082042	0.975634		1737.17	20.8547	1487	26.0362	1827.25	6.65913		29µm	5Hz	1.4m	Spot		0.0001	47.3726	144121	16187.4	21563.7	319649	622470	833.792	35911.5	5.44193e+07	6.38923e+06	72234.4	165
2015-493-Zr-006	DE14B241	0.324389	0.0111364	0.0943957	0.0132514	0.1099	0.00492785		0.00982481	129.601	14.2319	14.333	159.113	413.422	8.04877	19.379	12016.8		3.08272	0.0343304	0.1099	0.000541571	0.98297		1811.13	20.1694	1823.19	24.1599	1797.75	4.48391		29µm	5Hz	1.4m	Spot		0.0001	15.1576	204626	22580.5	22958.2	267838	819806	283.102	11195.1	5.12186e+07	6.17711e+06	72292.5	166
2015-493-Zr-008	DE14B243	0.296925	0.0126576	0.0871516	0.0150117	0.104089	0.00754432		8.71938e-08	85.2116	8.86626	13.2296	153.463	283.61	14.9698	97.6817	11246.5		3.36786	0.0426291	0.104089	0.00078528	0.969652		1676.04	21.2147	1688.96	25.354	1698.27	6.95039		29µm	5Hz	1.4m	Spot		0.0001	0.0001	100017	10458.1	15754.1	192047	418104	391.418	41953.1	3.80694e+07	4.29747e+06	73680.3	168
2015-493-Zr-011	DE14B246	0.325984	0.0115728	0.0938133	0.0154191	0.109072	0.00612757		6.42744e-08	59.516	6.47531	4.29089	47.8462	188.081	9.87911	10.9054	12460.2		3.06764	0.0355013	0.109072	0.000668347	0.983746		1818.89	21.0496	1812.43	27.946	1783.97	5.58502		29µm	5Hz	1.4m	Spot		16.9264	0.0001	94772	10362.6	6932.62	81234.6	376189	350.425	6354.85	5.16335e+07	6.4589e+06	67946.1	171
2015-493-Zr-012	DE14B247	0.320683	0.0116096	0.0924834	0.0141654	0.111633	0.00670162		0.00465599	48.6821	5.41274	9.69295	109.882	156.989	30.7512	58.0688	10914.2		3.11835	0.0362029	0.111633	0.00074812	0.981169		1793.06	20.8168	1787.84	25.3255	1826.17	6.0767		29µm	5Hz	1.4m	Spot		41.1033	7.11014	76089.9	8502.45	15371.9	183120	308215	1070.64	33214.9	5.06763e+07	5.55297e+06	67275.4	172
2015-493-Zr-013	DE14B248	0.299357	0.0117252	0.0949911	0.0134859	0.110624	0.00486861		0.0563668	161.742	17.8919	18.4508	204.909	561.156	24.0982	302.973	11527.5		3.34049	0.0391679	0.110624	0.000538585	0.970828		1688.12	19.7935	1834.18	24.7356	1809.69	4.42352		29µm	5Hz	1.4m	Spot		0.0001	83.7043	245837	27331.2	28455.4	332081	1.07138e+06	815.88	168529	4.92756e+07	5.70326e+06	65431.7	173
2015-493-Zr-014	DE14B249	0.234188	0.0116181	0.0677744	0.0143169	0.0912171	0.00812076		0.00315929	30.3107	2.76803	6.13726	94.764	133.572	20.6688	28.3271	11773.8		4.27007	0.0496102	0.0912171	0.000740752	0.939625		1356.41	15.7589	1325.45	18.9763	1451.14	7.7276		29µm	5Hz	1.4m	Spot		14.8497	4.78755	47013.9	4315.06	9659.21	156725	260250	714.096	16080.3	5.02807e+07	5.94431e+06	66436.3	174
2015-493-Zr-015	DE14B250	0.298089	0.0120308	0.0790803	0.0143051	0.112099	0.0061099		0.0133978	120.273	13.4959	20.5803	272.617	409.152	15.7866	76.1874	11312.4		3.3547	0.0403597	0.112099	0.000684914	0.970215		1681.83	20.2337	1538.33	22.006	1833.72	5.53506		29µm	5Hz	1.4m	Spot		0.0001	20.088	184580	20816.7	32049.1	446109	788784	539.647	42793.3	4.9745e+07	5.65086e+06	69652	175
2015-493-Zr-017	DE14B252	0.257303	0.0125855	0.0766984	0.0133396	0.0915521	0.00626037		0.00392765	96.5365	8.82536	20.7405	276.874	373.276	21.5	1456.48	10238		3.88647	0.048913	0.0915521	0.000573151	0.950612		1476.03	18.5765	1493.67	19.9249	1458.11	5.95166		29µm	5Hz	1.4m	Spot		15.3568	5.06553	127442	11710.2	27785	389750	619051	632.198	703766	4.27836e+07	4.39904e+06	72791.9	177
2015-493-Zr-018	DE14B253	0.298289	0.0118775	0.0907553	0.0139765	0.103997	0.00604396		6.45904e-08	50.9752	5.30376	8.35625	97.5769	178.137	4.64803	40.2516	12917.6		3.35245	0.0398189	0.103997	0.000628555	0.970312		1682.82	19.9878	1755.84	24.5405	1696.65	5.56929		29µm	5Hz	1.4m	Spot		62.6846	0.0001	80784.3	8448.33	13438.8	164894	354657	164.068	23349.1	5.13555e+07	6.66287e+06	75480.4	178
2015-493-Zr-020	DE14B255	0.25238	0.0118941	0.0766477	0.0153915	0.0979458	0.00889038		0.00833286	56.7474	5.55259	8.8946	117.824	221.964	4.40529	24.1984	13830.7		3.96228	0.0471279	0.0979458	0.000870775	0.948264		1450.74	17.2552	1492.72	22.9751	1585.38	8.31021		29µm	5Hz	1.4m	Spot		2.43902	11.9389	83227.4	8185.64	13238.9	184271	408987	143.903	12991.4	4.75186e+07	6.60173e+06	71416.1	180
2015-493-Zr-021	DE14B256	0.229632	0.0140083	0.0786691	0.0152658	0.088806	0.0102967		0.0702185	138.734	12.3197	16.0669	207.825	594.06	18.8067	287.472	14459.1		4.35479	0.0610032	0.088806	0.000914406	0.937472		1332.57	18.6671	1530.63	23.3662	1399.98	9.86679		29µm	5Hz	1.4m	Spot		22.4266	83.9686	169827	15158.9	19960.5	271288	913631	512.749	128819	3.96577e+07	5.76026e+06	72347.2	181
2015-493-Zr-022	DE14B259	0.335823	0.0111445	0.0958346	0.0146431	0.109675	0.00516724		6.81989e-08	98.0553	10.7549	5.15843	56.509	302.691	2.3488	7.9161	14436		2.97776	0.0331856	0.109675	0.00056672	0.988535		1866.54	20.8016	1849.75	27.0861	1794.02	4.70389		29µm	5Hz	1.4m	Spot		0.0001	0.0001	147188	16228.6	7859.04	90458.3	570886	78.5232	4350.31	4.86176e+07	7.05173e+06	75294.9	184
2015-493-Zr-023	DE14B260	0.32012	0.0113333	0.0915076	0.0147389	0.107168	0.00677217		0.0119143	44.4499	4.77652	5.40754	62.1448	143.517	8.72565	0.917409	11655.5		3.12383	0.0354032	0.107168	0.00072576	0.980895		1790.31	20.2901	1769.78	26.0846	1751.81	6.19722		29µm	5Hz	1.4m	Spot		0.0001	18.889	72143.7	7793.26	8908.18	107564	292678	315.406	545.146	5.25631e+07	6.15594e+06	78760.8	185
2015-493-Zr-024	DE14B261	0.318055	0.0114812	0.0969274	0.0132002	0.108686	0.00514036		0.0230697	100.688	10.9414	12.3568	133.01	325.248	6.14227	34.4812	11361.5		3.14411	0.0360983	0.108686	0.000558687	0.979892		1780.22	20.4391	1869.89	24.6829	1777.52	4.68896		29µm	5Hz	1.4m	Spot		42.5913	36.2638	162033	17700.4	20183.8	228270	657669	220.136	20316.3	5.21123e+07	5.94958e+06	73677.2	186
2015-493-Zr-025	DE14B262	0.229151	0.0139807	0.067685	0.0176909	0.0869336	0.0125851		6.93478e-08	20.2214	1.74842	4.60011	69.693	88.2979	17.0077	1.77225	9220.14		4.36394	0.0610109	0.0869336	0.00109407	0.937245		1330.05	18.595	1323.75	23.4184	1359.02	12.1281		29µm	5Hz	1.4m	Spot		40.9313	0.0001	29852.4	2594.84	6893.2	109725	163794	559.172	957.953	4.7802e+07	4.42914e+06	71339.5	187
2015-493-Zr-026	DE14B263	0.225875	0.0122641	0.0675261	0.0175807	0.0901306	0.0142571		0.0153696	45.5407	4.06004	8.09963	128.859	212.226	10.8963	39.5194	10298.9		4.42723	0.0542959	0.0901306	0.00128501	0.935699		1312.84	16.1008	1320.75	23.2196	1428.3	13.6091		29µm	5Hz	1.4m	Spot		75.614	24.2369	73522.7	6589.57	13273.4	221865	430536	391.766	23361.4	5.22711e+07	5.41022e+06	70209.3	188
2015-493-Zr-027	DE14B264	0.340221	0.0122128	0.100341	0.0146311	0.112996	0.00725945		0.0057664	86.0838	9.71813	12.3212	125.82	251.94	12.1441	36.9688	9523.46		2.93927	0.0358966	0.112996	0.000820289	0.990679		1887.73	23.0545	1932.7	28.2775	1848.15	6.56494		29µm	5Hz	1.4m	Spot		0.0001	7.37775	112760	12797.7	16383	175770	414697	354.26	17731.7	4.24069e+07	4.05902e+06	70548.6	189
2015-493-Zr-028	DE14B265	0.34418	0.0117836	0.0986248	0.0130483	0.111641	0.0054789		0.00531652	79.7822	8.89695	17.7	189.456	241.634	6.4157	10.6587	10945.7		2.90545	0.0342366	0.111641	0.000611671	0.992609		1906.75	22.4683	1901.15	24.8068	1826.3	4.96792		29µm	5Hz	1.4m	Spot		0.0001	7.4529	114506	12837.6	25787.7	289999	435801	205.059	5601.71	4.64606e+07	5.11148e+06	70200.1	190
2015-493-Zr-029	DE14B266	0.239797	0.0124814	0.0697722	0.014702	0.0880455	0.00862791		6.88844e-08	44.3123	3.91082	6.60919	97.6591	186.185	9.92663	20.2069	11885.8		4.1702	0.05205	0.0880455	0.000759649	0.942282		1385.64	17.2948	1363.23	20.0421	1383.48	8.28652		29µm	5Hz	1.4m	Spot		13.575	0.0001	65861.9	5843.97	9972.11	154809	347755	328.564	10998.1	4.811e+07	5.74789e+06	70423.7	191
2015-493-Zr-031	DE14B268	0.315386	0.0111476	0.0906763	0.0130593	0.109513	0.00493256		6.17086e-08	89.8401	9.84694	10.6155	122.35	294.147	7.53353	11.8291	12002.1		3.17072	0.035346	0.109513	0.000540179	0.978596		1767.16	19.6996	1754.38	22.911	1791.32	4.49175		29µm	5Hz	1.4m	Spot		10.0553	0.0001	149063	16426.6	17881	216516	613342	278.351	7187.69	5.36969e+07	6.47898e+06	76943.4	193
2015-493-Zr-032	DE14B269	0.275924	0.0149044	0.0758588	0.0217739	0.105933	0.00790057		8.5497e-08	83.813	8.88636	9.3685	124.325	299.212	29.8785	181.841	10517		3.62418	0.0540164	0.105933	0.000836927	0.959531		1570.8	23.4119	1477.9	32.1796	1730.56	7.24905		29µm	5Hz	1.4m	Spot		35.919	0.0001	100372	10699.9	11390.3	158801	450329	796.799	79752.9	3.87537e+07	4.09759e+06	75862.9	194
2015-493-Zr-033	DE14B270	0.291539	0.0117765	0.0839454	0.0127244	0.106615	0.00683767		0.00126431	81.0308	8.65039	32.3709	393.535	276.555	20.8938	52.5449	9256.05		3.43007	0.0403943	0.106615	0.000728999	0.967051		1649.21	19.422	1629.26	20.7314	1742.33	6.26457		29µm	5Hz	1.4m	Spot		0.954813	1.64367	107862	11577.6	43746.9	558726	462658	619.325	25616.3	4.30717e+07	4.0084e+06	74488.7	195
2015-493-Zr-035	DE14B272	0.322113	0.011859	0.0917966	0.0147256	0.108828	0.00854529		0.0181548	26.542	2.87846	4.81629	54.7666	84.8382	23.9401	15.1266	10633.3		3.1045	0.0368162	0.108828	0.000929964	0.981864		1800.04	21.3466	1775.13	26.1399	1779.88	7.79261		29µm	5Hz	1.4m	Spot		0.0001	28.9964	43407.1	4733.35	7997.16	95533.2	174381	871.817	9060.79	5.29085e+07	5.65719e+06	70940.3	197
2015-493-Zr-036	DE14B273	0.287686	0.0122462	0.0692861	0.0179867	0.104157	0.00765626		0.0118722	81.8343	8.5454	7.90236	116.705	280.907	18.8805	31.4415	12219.5		3.47601	0.0425681	0.104157	0.000797452	0.965192		1629.95	19.9608	1354.04	24.3547	1699.47	7.05245		29µm	5Hz	1.4m	Spot		0.0001	17.522	123672	12985.4	12125.5	188123	533567	635.351	17404	4.88873e+07	6.00738e+06	70363.8	198
2015-493-Zr-038a	DE14B277	0.313031	0.011591	0.0929175	0.0134598	0.110245	0.00525954		0.00539803	84.6661	9.31946	11.5788	126.838	282.099	8.06911	79.262	10854.4		3.19457	0.0370282	0.110245	0.000579837	0.977453		1755.6	20.3491	1795.87	24.172	1803.45	4.78237		29µm	5Hz	1.4m	Spot		17.7153	8.61561	138379	15317.1	19216.7	221133	579555	293.649	47456.5	5.28531e+07	5.77057e+06	67296.6	202
2015-493-Zr-038b	DE14B276	0.297479	0.0125981	0.0806494	0.0159562	0.110739	0.00624887		0.00967503	75.4843	8.34338	8.52573	110.846	256.186	12.1083	60.1387	10721.4		3.36158	0.0423497	0.110739	0.000691995	0.96992		1678.8	21.1497	1567.7	25.0146	1811.58	5.67628		29µm	5Hz	1.4m	Spot		60.8506	16.1581	129091	14348.2	14805.2	202207	550702	461.075	37674.6	5.53079e+07	5.96421e+06	67929.4	201
2015-493-Zr-041	DE14B283	0.310707	0.0113619	0.0886773	0.0136861	0.108021	0.00598382		6.22495e-08	51.5791	5.57696	8.44387	99.1792	171.234	4.9756	34.6224	9032.65		3.21847	0.0365678	0.108021	0.000646376	0.976325		1744.18	19.8172	1717.3	23.5031	1766.3	5.46595		29µm	5Hz	1.4m	Spot		0.0001	0.0001	84857.7	9227.62	14108.5	174068	354161	182.25	20870.4	5.31741e+07	4.83303e+06	67427.1	208
2015-493-Zr-043	DE14B285	0.327991	0.0111466	0.0923426	0.0141979	0.108683	0.00590069		6.18882e-08	63.29	6.88068	7.30183	82.5333	199.186	8.43845	1.80593	9492.3		3.04886	0.0339843	0.108683	0.000641302	0.984722		1828.64	20.383	1785.24	25.3467	1777.45	5.38257		29µm	5Hz	1.4m	Spot		0.0001	0.0001	104736	11452	12272.5	145708	414411	310.896	1095.08	5.34769e+07	5.10853e+06	65969.8	210
2015-493-Zr-046A	DE14B288	0.273705	0.0125515	0.083143	0.0138679	0.0984053	0.00822206		0.0232563	81.841	8.02718	27.9322	345.399	296.842	13.8905	44.3829	10617.8		3.65357	0.0458579	0.0984053	0.000809094	0.958465		1559.58	19.5752	1614.29	22.3868	1594.12	7.67674		29µm	5Hz	1.4m	Spot		0.0001	30.5372	110065	10858.2	38155.7	495576	501933	415.881	21873.7	4.34481e+07	4.64347e+06	61029.3	213
2015-493-Zr-046B	DE14B289	0.279513	0.0117372	0.0809891	0.0130236	0.0970017	0.00510434		0.00475823	81.0202	7.85629	28.38	364.999	297.544	12.2191	2.85517	10525.1		3.57765	0.0419916	0.0970017	0.000495129	0.961256		1588.91	18.6493	1574.06	20.5	1567.25	4.78258		29µm	5Hz	1.4m	Spot		0.0001	7.72774	134771	13144.6	47951.8	647760	622314	452.495	1740.53	5.37353e+07	5.69315e+06	63230.9	214
2015-493-Zr-047	DE14B290	0.319542	0.0115903	0.0904474	0.012833	0.109458	0.00654209		6.24939e-08	45.4558	4.97648	15.1519	174.81	146.322	10.6815	1.04445	10998		3.12948	0.0362717	0.109458	0.000716087	0.980614		1787.49	20.7176	1750.14	22.4596	1790.42	5.9581		29µm	5Hz	1.4m	Spot		0.0001	0.0001	74499.9	8203.93	25225.2	305673	301537	389.729	627.355	5.294e+07	5.86127e+06	62685.5	215
2015-493-Zr-048A	DE14B291	0.32197	0.0112516	0.0925531	0.0146283	0.10824	0.00629994		0.00584018	56.5345	6.12811	6.62495	74.6466	179.526	7.06933	4.96497	11947.9		3.10588	0.0349462	0.10824	0.000681906	0.981794		1799.34	20.2455	1789.13	26.172	1770	5.75207		29µm	5Hz	1.4m	Spot		0.0001	9.29583	92169.5	10049.4	10971.5	129842	368023	256.571	2966.63	5.26567e+07	6.33383e+06	63282.6	216
2015-493-Zr-048B	DE14B292	0.321274	0.0109737	0.0956273	0.0140567	0.108039	0.00495683		6.43301e-08	102.486	11.064	7.78622	85.6006	330.002	9.72494	36.5783	12342.6		3.11261	0.0341568	0.108039	0.000535533	0.981456		1795.95	19.7081	1845.92	25.9476	1766.61	4.52766		29µm	5Hz	1.4m	Spot		30.0395	0.0001	163181	17720.1	12593.7	145418	660701	344.7	21346	5.14217e+07	6.39009e+06	63723.9	217
2015-493-Zr-051	DE14B295	0.341093	0.0133758	0.100259	0.0189822	0.111809	0.0110164		0.0235252	82.6601	9.25209	11.0859	109.572	238.699	13.0956	24.4211	11264.5		2.93176	0.0392145	0.111809	0.00123173	0.991104		1891.92	25.306	1931.19	36.6582	1829.03	9.98566		29µm	5Hz	1.4m	Spot		0.0001	30.933	111333	12535.5	15168.9	157464	404290	392.63	12056.6	4.34867e+07	4.93282e+06	61771	220
2015-493-Zr-053	DE14B297	0.310411	0.0111291	0.0885644	0.0127626	0.10498	0.00490643		0.00701148	107.514	11.301	13.9442	164.275	356.958	6.52651	2.57305	12429.9		3.22153	0.0358529	0.10498	0.000515075	0.976182		1742.73	19.3951	1715.21	21.8905	1713.96	4.51123		29µm	5Hz	1.4m	Spot		0.0001	11.216	176177	18629.1	23214.2	287225	735589	238.059	1545.58	5.28977e+07	6.62197e+06	61743.3	222
2015-493-Zr-056	DE14B300	0.283957	0.0112433	0.0821745	0.0137429	0.104863	0.00516671		0.0198033	83.2673	8.73779	10.0468	127.381	301.998	19.1529	68.4214	12060.7		3.52166	0.039595	0.104863	0.000541799	0.963395		1611.26	18.1158	1596.21	21.9365	1711.92	4.75176		29µm	5Hz	1.4m	Spot		7.72419	32.2382	138862	14659.8	17023.5	226674	633400	710.96	41831.6	5.38206e+07	6.53859e+06	62180.3	225
2015-493-Zr-057	DE14B301	0.302158	0.0116895	0.0752513	0.0176717	0.107612	0.00638111		6.15588e-08	49.9933	5.37236	2.87003	39.9011	172.158	12.0961	33.1967	11350.3		3.30953	0.0386867	0.107612	0.000686686	0.972184		1702	19.8955	1466.49	25.9152	1759.37	5.83387		29µm	5Hz	1.4m	Spot		14.6011	0.0001	83196.6	8994.65	4852.91	70855.2	360327	448.057	20253.8	5.37026e+07	6.14035e+06	60123.2	226
2015-493-Zr-059	DE14B305	0.320619	0.0115103	0.0922272	0.0147838	0.108129	0.00675951		0.0246255	40.5581	4.38221	6.64252	75.0256	130.661	17.605	3.28317	11387.3		3.11897	0.0359003	0.108129	0.000730902	0.981138		1792.75	20.6352	1783.1	26.361	1768.14	6.1731		29µm	5Hz	1.4m	Spot		0.0001	39.1967	66138.4	7190	11007.2	130558	268002	638.974	1963.11	5.2605e+07	6.03594e+06	66417.8	230
2015-493-Zr-060	DE14B306	0.23308	0.0125001	0.0672763	0.013997	0.0863827	0.0110248		0.0120782	29.2047	2.51877	15.5341	246.42	132.871	28.1936	7.44159	10436.5		4.29037	0.0536299	0.0863827	0.000952349	0.939101		1350.62	16.8828	1316.02	18.4203	1346.76	10.6426		29µm	5Hz	1.4m	Spot		0.0001	20.8707	51702.4	4486.56	27946	465542	295878	1110.89	4830.73	5.71045e+07	6.00554e+06	64422.9	231
2015-493-Zr-061	DE14B307	0.487624	0.0125006	0.14591	0.0143544	0.166617	0.00525418		0.00426422	56.1312	9.38755	9.70492	69.9409	119.668	5.79375	15.9681	10635.2		2.05076	0.0256358	0.166617	0.000875435	1.06208		2560.39	32.0064	2752.89	39.516	2523.94	4.41166		29µm	5Hz	1.4m	Spot		35.5248	6.14211	82834.1	13939.1	14554.1	110146	222135	190.293	8640.97	4.7597e+07	5.10128e+06	65920.3	232
2015-493-Zr-064	DE14B310	0.337157	0.010986	0.0981075	0.0130764	0.120347	0.0046269		7.22814e-08	108.116	13.0058	23.1506	246.803	331.234	57.9019	81.9952	10963.7		2.96598	0.0325843	0.120347	0.000556833	0.989185		1872.98	20.5765	1891.63	24.7356	1961.37	4.12814		29µm	5Hz	1.4m	Spot		41.0423	0.0001	153254	18550.8	33350.8	373356	590641	1826.65	42624.4	4.57071e+07	5.05097e+06	61219.8	235
2015-493-Zr-065	DE14B311	0.313604	0.011217	0.090062	0.0136013	0.107126	0.00528279		0.000247159	73.445	7.85286	10.1446	117.513	241.602	5.91912	2.46815	10979.7		3.18874	0.0357681	0.107126	0.000565921	0.977731		1758.42	19.7242	1742.99	23.707	1751.08	4.83473		29µm	5Hz	1.4m	Spot		0.0001	0.400873	122053	13131.8	17133.8	208415	505082	218.916	1504.25	5.35809e+07	5.93007e+06	61191.7	236
2015-493-Zr-066	DE14B312	0.296104	0.0116963	0.0842233	0.014911	0.101169	0.00818102		6.27495e-08	26.702	2.71349	5.91358	73.0534	93.2176	10.8088	5.73208	10805.7		3.37719	0.0395005	0.101169	0.000827665	0.969256		1671.96	19.5557	1634.44	24.3712	1645.67	7.58767		29µm	5Hz	1.4m	Spot		66.1543	0.0001	43601.1	4458.61	9814.06	127308	191486	392.789	3432.75	5.26428e+07	5.73427e+06	60391.2	237
2015-493-Zr-067	DE14B313	0.244398	0.0117564	0.0712816	0.0161927	0.0882334	0.00963541		0.00308375	23.2889	2.05596	2.92197	42.9789	98.1783	12.0344	1.12677	9493.04		4.09169	0.0481036	0.0882334	0.000850165	0.944466		1409.52	16.5709	1391.73	22.5358	1387.57	9.24892		29µm	5Hz	1.4m	Spot		18.314	4.94539	38268.4	3399.64	4880.05	75373	202956	440.086	679.075	5.29712e+07	5.06944e+06	59796.6	238
2015-493-Zr-068	DE14B314	0.307319	0.0112014	0.0889237	0.012805	0.104712	0.00520731		6.21769e-08	93.5108	9.81082	16.5125	193.582	313.649	7.62919	26.5899	13307.5		3.25395	0.0364487	0.104712	0.000545268	0.974683		1727.5	19.3503	1721.87	22.0486	1709.26	4.79071		29µm	5Hz	1.4m	Spot		0.0001	0.0001	154103	16270.1	27658.5	340478	650278	279.798	16072	5.31202e+07	7.12685e+06	59682.9	239
2015-493-Zr-069A	DE14B315	0.302271	0.0114412	0.0905176	0.0128807	0.105601	0.00500201		0.0211788	149.448	15.806	15.6774	179.989	504.376	8.95441	126.081	13581.6		3.30829	0.0378508	0.105601	0.000528217	0.972238		1702.56	19.4793	1751.44	22.5598	1724.8	4.59284		29µm	5Hz	1.4m	Spot		23.8996	32.231	233050	24804.1	24849.1	299561	989528	310.746	72115	5.02609e+07	6.88255e+06	60451.7	240
2015-493-Zr-069B	DE14B316	0.306836	0.011417	0.0882939	0.0133096	0.106934	0.00662624		6.33495e-08	51.5864	5.51403	9.19984	108.472	173.255	17.6084	10.5031	10199.3		3.25907	0.0372089	0.106934	0.000708568	0.974449		1725.12	19.6957	1710.18	22.7618	1747.8	6.06672		29µm	5Hz	1.4m	Spot		55.0921	0.0001	83442	8975.75	15125.8	187263	352583	633.832	6231.6	5.21296e+07	5.36107e+06	61338.4	241
2015-493-Zr-070	DE14B317	0.285166	0.0124659	0.0835628	0.0199895	0.1049	0.00566731		0.00569943	106.722	11.1922	5.59463	67.1065	368.46	19.2649	80.7817	13006.7		3.50673	0.0437145	0.1049	0.000594501	0.963977		1617.33	20.1614	1622.12	32.4253	1712.56	5.21174		29µm	5Hz	1.4m	Spot		66.9027	7.46505	143236	15117.4	7632.62	96130.1	622196	575.394	39770.6	4.32512e+07	5.67268e+06	61513	242
2015-493-Zr-071	DE14B318	0.31886	0.0109517	0.0915189	0.0137589	0.107435	0.00541522		0.00569002	75.6818	8.1412	8.88793	101.645	244.286	8.17162	5.75313	12189.2		3.13617	0.0343465	0.107435	0.000581786	0.980283		1784.16	19.5397	1769.99	24.353	1756.37	4.95267		29µm	5Hz	1.4m	Spot		2.60214	9.03985	123210	13338.6	14708.4	176620	500380	296.043	3435.75	5.24582e+07	6.44821e+06	59942.8	243
2015-493-Zr-072	DE14B319	0.322804	0.0110608	0.0935074	0.0123945	0.108897	0.0046968		0.00308817	119.718	13.0596	19.9032	221.525	382.006	10.1614	31.8555	11537.1		3.09786	0.0342647	0.108897	0.000511468	0.9822		1803.41	19.9471	1806.78	22.394	1781.05	4.28248		29µm	5Hz	1.4m	Spot		0.0001	4.82281	191589	21033.8	32378.7	378391	769200	361.87	18701.4	5.15625e+07	5.99937e+06	60295.7	244
2016-003-zr-001	MA02B064	0.326124	0.0121768	0.0944385	0.0139434	0.109948	0.00543812		4.88716e-08	64.6521	7.11582	17.0802	191.54	207.073	8.4611	20.4531	13534.3		3.06632	0.037338	0.109948	0.000597909	0.983814		1819.57	22.1565	1823.98	25.4324	1798.54	4.94773		29µm	5Hz	1.81	Spot		86.7971	0.0001	131743	14763.6	35208.2	418293	532123	294.937	12618.7	6.15005e+07	8.93543e+06	78927.3	8
2016-003-zr-002	MA02B065	0.281958	0.015091	0.0857053	0.0171638	0.0987316	0.0125399		0.0124096	53.3263	5.23615	13.541	158.711	186.103	9.09713	40.0186	10856		3.54663	0.0535222	0.0987316	0.00123809	0.962433		1601.22	24.164	1662.05	28.5271	1600.3	11.6988		29µm	5Hz	1.81	Spot		133.791	21.5747	92327.1	9230.29	23716	294484	406326	269.47	20979.1	5.22577e+07	6.0897e+06	77920.5	9
2016-003-zr-004	FE10B208	0.317231	0.0117264	0.0933286	0.015343	0.107287	0.00573584		4.8234e-08	59.0446	6.32545	11.3683	126.974	191.331	19.3031	3.1416	9909.95		3.15228	0.0369647	0.107287	0.000615379	0.979492		1776.19	20.8283	1803.47	27.6706	1753.83	5.24755		29µm	5Hz	1.81	Spot		119.161	0.0001	123689	13370.7	24046	284507	499058	677.538	1925.02	5.99266e+07	6.73011e+06	75377	12
2016-003-zr-005	MA02B067	0.312786	0.0138941	0.0899168	0.0176055	0.109714	0.01158		4.97995e-08	11.4011	1.24716	3.07795	36.4546	38.0237	34.7723	555.797	10702.1		3.19708	0.0444204	0.109714	0.00127049	0.977334		1754.4	24.3758	1740.3	30.6389	1794.67	10.5408		29µm	5Hz	1.81	Spot		213.058	0.0001	22799.7	2539.24	6226.5	78122.2	95883.6	1190.02	336582	6.03669e+07	6.93422e+06	82569.8	11
2016-003-zr-007	MA02B068	0.338485	0.0120477	0.0965378	0.0140891	0.113784	0.00570037		4.90207e-08	54.1683	6.18397	10.4025	114.686	166.953	5.11032	1.74548	10655.9		2.95434	0.0355929	0.113784	0.000648612	0.989833		1879.38	22.6421	1862.71	26.244	1860.71	5.14719		29µm	5Hz	1.81	Spot		170.182	0.0001	110046	12790.6	21377.9	249672	427682	177.695	1073.9	6.13302e+07	7.01402e+06	86438.1	12
2016-003-zr-008	MA02B069	0.289362	0.0128138	0.0848418	0.017409	0.099442	0.0095226		0.00898618	19.4847	1.93708	3.30493	41.4486	69.9844	14.8453	0.515554	10908.9		3.45588	0.044283	0.099442	0.000946946	0.966		1638.34	20.9933	1645.97	28.6547	1613.67	8.86848		29µm	5Hz	1.81	Spot		93.6065	18.4047	39742.8	4022.54	6819.08	90592.4	179991	518.334	318.483	6.15797e+07	7.20938e+06	87357.2	13
2016-003-zr-009	MA02B070	0.342702	0.012118	0.0996426	0.0145496	0.113917	0.00626738		0.00433271	56.0645	6.38871	9.69001	102.761	169.879	15.44	3.19214	10876.6		2.91799	0.0353601	0.113917	0.000713959	0.991888		1899.65	23.0199	1919.86	27.9332	1862.81	5.65773		29µm	5Hz	1.81	Spot		103.288	8.69983	112112	13006.4	19601.3	220190	428328	528.603	1933.4	6.0376e+07	7.04717e+06	83615.9	14
2016-003-zr-010	FE10B214	0.319765	0.011322	0.0917778	0.0152095	0.110273	0.00567669		4.78306e-08	49.5912	5.46749	11.4362	129.806	159.375	13.8588	5.79349	11451.7		3.1273	0.0354071	0.110273	0.000625987	0.980723		1788.58	20.2502	1774.78	26.9935	1803.91	5.16138		29µm	5Hz	1.81	Spot		16.9048	0.0001	104760	11654.3	24392.6	293296	419178	490.689	3581.32	6.04458e+07	7.84307e+06	77289.3	18
2016-003-zr-0105	FE10B322	0.228674	0.0123223	0.0696125	0.0173016	0.0923238	0.010026		5.37264e-08	27.9303	2.57849	9.08448	130.787	119.869	18.2789	87.7358	10134.4		4.37303	0.0538857	0.0923238	0.000925637	0.93702		1327.55	16.3584	1360.21	23.5338	1474.06	9.5111		29µm	5Hz	1.81	Spot		0.0001	0.0001	52508.5	4890.48	17238.1	262919	280256	579.198	48624.8	5.40333e+07	6.18327e+06	64392.8	126
2016-003-zr-011	MA02B071	0.326963	0.012515	0.0934741	0.0174077	0.110054	0.00895753		0.0133023	26.3083	2.87872	4.99855	57.0402	84.0832	76.4875	678.19	11733.7		3.05845	0.0382766	0.110054	0.000985813	0.984222		1823.64	22.823	1806.16	31.4411	1800.3	8.14801		29µm	5Hz	1.81	Spot		128.99	25.4576	50141.9	5585.73	9637.1	116488	202058	2496.17	391526	5.75485e+07	7.24606e+06	80403.1	15
2016-003-zr-0117	FE10B334	0.321122	0.0115265	0.0927636	0.0152316	0.109015	0.00628282		4.58642e-08	37.2118	4.0478	10.656	119.102	118.252	10.4787	4.87412	11411.1		3.11408	0.0358945	0.109015	0.000684923	0.981382		1795.2	20.6924	1793.03	27.3107	1783.03	5.72719		29µm	5Hz	1.81	Spot		0.0001	0.0001	81946.8	8992.79	23684.5	280453	323818	389.183	3166.88	6.33248e+07	8.15627e+06	67526.4	138
2016-003-zr-012	MA02B072	0.257625	0.0122214	0.0794441	0.0141743	0.0940487	0.00625998		0.008405	67.6557	6.36277	11.6664	156.217	273.46	9.16378	22.3049	11264.5		3.8816	0.0474387	0.0940487	0.000588743	0.950766		1477.68	18.0594	1545.15	21.9013	1509.09	5.91068		29µm	5Hz	1.81	Spot		108.983	16.6348	133353	12767.6	23260.9	329918	679577	309.32	13317.6	5.95184e+07	7.19399e+06	79968.6	16
2016-003-zr-0122	FE10B341	0.258008	0.0117887	0.0850259	0.0167026	0.095894	0.00629652		0.0342846	110.361	10.6111	17.0564	204.534	428.065	18.2187	117.573	12317.6		3.87585	0.0456913	0.095894	0.000603799	0.950949		1479.64	17.4431	1649.4	27.5492	1545.7	5.91637		29µm	5Hz	1.81	Spot		112.575	33.6955	109548	10625.9	17087.8	217088	528330	305.112	34450.1	2.8552e+07	3.96877e+06	69634.8	145
2016-003-zr-013	MA02B073	0.231278	0.0125366	0.0703079	0.0141022	0.0885904	0.00612478		0.00377152	69.835	6.18455	19.7257	301.493	318.491	8.93888	26.3972	9600.22		4.32379	0.0542056	0.0885904	0.000542597	0.93825		1341.2	16.814	1373.35	19.3672	1395.32	5.87284		29µm	5Hz	1.81	Spot		101.161	8.03542	148179	13359.2	42338.6	685422	852012	324.855	16967.9	6.40758e+07	6.60023e+06	77465.9	17
2016-003-zr-0138	FE10B357	0.299396	0.0159003	0.100674	0.0213749	0.115171	0.0159818		0.0101957	5.38155	0.614247	1.3435	13.818	18.6748	19.7892	4.15021	9120.24		3.34006	0.053108	0.115171	0.00184063	0.970847		1688.31	26.8446	1938.8	41.4417	1882.56	14.3929		29µm	5Hz	1.81	Spot		0.0001	21.223	11313.3	1302.66	2850.41	31059.2	48805.7	702.463	2578.23	6.05086e+07	6.22439e+06	67165.9	161
2016-003-zr-014	MA02B074	0.299255	0.0126999	0.0886992	0.0142935	0.101614	0.00560001		0.00154183	79.0428	8.03469	17.5133	212.522	281.537	9.38898	37.3499	11235.6		3.34163	0.0424384	0.101614	0.000569038	0.970779		1687.62	21.4326	1717.71	24.552	1653.8	5.18843		29µm	5Hz	1.81	Spot		145.61	3.11249	158912	16444.3	35616.6	457777	713599	323.346	22749.3	6.07161e+07	7.31911e+06	78771.2	18
2016-003-zr-015	MA02B075	0.322054	0.0119144	0.0935291	0.0144557	0.109279	0.00469165		4.82684e-08	108.476	11.8709	11.9538	135.546	350.641	7.00656	54.2713	12896.4		3.10507	0.0369951	0.109279	0.000512697	0.981835		1799.75	21.443	1807.18	26.1241	1787.42	4.27443		29µm	5Hz	1.81	Spot		115.241	0.0001	223820	24933.8	24949.2	299634	912088	247.674	33926.8	6.23158e+07	8.62188e+06	76365.8	19
2016-003-zr-016	MA02B076	0.317626	0.0129001	0.0939684	0.0155899	0.111786	0.00827727		4.73596e-08	30.4761	3.41121	6.26512	70.6396	99.0776	18.0134	5.97129	11421.9		3.14836	0.0406141	0.111786	0.000925284	0.979683		1778.12	22.9379	1815.3	28.3002	1828.66	7.50315		29µm	5Hz	1.81	Spot		156.882	0.0001	64088.4	7302.42	13327.1	159147	262661	649.065	3804.75	6.3516e+07	7.78275e+06	77119.9	20
2016-003-zr-019	MA02B078	0.289085	0.012681	0.0849062	0.0162449	0.0998416	0.00812327		0.00684767	23.7824	2.37539	4.71033	58.9055	85.3524	20.3673	2.93506	9490.88		3.45919	0.0438659	0.0998416	0.00081104	0.965867		1636.95	20.7582	1647.17	26.758	1621.13	7.55796		29µm	5Hz	1.81	Spot		97.9848	14.2129	49161.8	4998.38	9849.29	130447	222414	721.598	1838.57	6.24438e+07	6.3572e+06	74305.7	22
2016-003-zr-020	MA02B082	0.265615	0.0153085	0.0811491	0.015111	0.102095	0.00942268		0.0332301	167.21	16.974	27.0851	344.969	623.068	50.6743	427.792	9641.72		3.76485	0.0576341	0.102095	0.000962006	0.954586		1518.5	23.246	1577.05	23.8308	1662.55	8.72039		29µm	5Hz	1.81	Spot		112.103	49.764	249396	25769.4	40863.2	551141	1.17135e+06	1296.11	193401	4.50663e+07	4.65987e+06	74073	26
2016-003-zr-022	MA02B084	0.301414	0.0137793	0.0836897	0.0147527	0.113511	0.00488519		0.00880231	104.97	11.9255	13.596	171.94	364.023	18.0636	96.661	10653.3		3.3177	0.0457157	0.113511	0.000554521	0.971824		1698.32	23.4017	1624.49	23.9656	1856.37	4.41343		29µm	5Hz	1.81	Spot		114.456	17.0872	202949	23468.1	26589.1	356066	887057	599.063	56653.6	5.84254e+07	6.67429e+06	76952.5	28
2016-003-zr-024	MA02B086	0.245644	0.0126137	0.0757254	0.0172033	0.0923544	0.00840889		0.0127497	27.3997	2.5275	3.58813	50.099	115.931	3.36903	4.62663	13347		4.07093	0.0513497	0.0923544	0.000776598	0.945058		1415.97	17.8607	1475.4	25.3817	1474.68	7.97637		29µm	5Hz	1.81	Spot		69.8972	26.6935	57135.2	5364.33	7568.23	111891	304674	120.539	2925.05	6.30223e+07	9.01882e+06	78634.4	30
2016-003-zr-025	MA02B087	0.253816	0.0122821	0.0756098	0.0144732	0.0904753	0.00680504		4.6885e-08	37.0985	3.35975	8.69175	122.063	152.044	6.14988	3.48988	11552.8		3.93986	0.0483897	0.0904753	0.000615688	0.948949		1458.13	17.9089	1473.22	21.3223	1435.58	6.48927		29µm	5Hz	1.81	Spot		123.799	0.0001	78809	7264.18	18676.4	277715	407058	224.188	2247.86	6.42072e+07	7.95276e+06	78382.9	31
2016-003-zr-026	MA02B089	0.275189	0.0123006	0.0807267	0.0144572	0.0982552	0.0078063		4.74031e-08	31.88	3.12918	7.56874	99.5762	120.69	10.5826	0.556516	10991.7		3.63386	0.0446986	0.0982552	0.00076701	0.959178		1567.09	19.2761	1569.15	22.6854	1591.27	7.29127		29µm	5Hz	1.81	Spot		62.5377	0.0001	66983.8	6691.58	16085.7	224068	319570	381.672	354.587	6.35142e+07	7.48399e+06	84801.2	33
2016-003-zr-028	MA02B090	0.323705	0.0125199	0.0945991	0.0149431	0.111507	0.00734708		0.00986591	31.5423	3.5115	8.96225	100.106	101.138	17.9786	5.48409	11757.5		3.08923	0.038677	0.111507	0.000819254	0.982638		1807.8	22.6335	1826.95	27.3003	1824.13	6.66363		29µm	5Hz	1.81	Spot		129.719	20.6604	65789.5	7454.09	18907.9	223607	265833	643.76	3468.87	6.30535e+07	7.94696e+06	84233.4	34
2016-003-zr-029	MA02B091	0.318081	0.0126657	0.0942182	0.0159843	0.107119	0.00705854		4.60686e-08	32.8209	3.52196	5.09421	57.5198	107.509	9.05487	3.68572	10759.5		3.14386	0.0398191	0.107119	0.000756105	0.979904		1780.35	22.5494	1819.91	29.09	1750.97	6.45996		29µm	5Hz	1.81	Spot		130.507	0.0001	70959.3	7749.53	11140.3	133175	292902	336.128	2416.73	6.5363e+07	7.53829e+06	85861.1	35
2016-003-zr-030	MA02B092	0.315695	0.0128083	0.0922886	0.0156232	0.108159	0.00834		4.68315e-08	23.9624	2.59702	5.7538	66.5306	79.2887	15.5693	1.96776	11231.1		3.16761	0.0405718	0.108159	0.000902044	0.978746		1768.67	22.6537	1784.24	27.8755	1768.63	7.616		29µm	5Hz	1.81	Spot		104.634	0.0001	50963.4	5621.19	12377.7	151525	212493	568.616	1269.33	6.43026e+07	7.74075e+06	85792.2	36
2016-003-zr-031	MA02B093	0.283987	0.0124722	0.0790404	0.0147941	0.0999916	0.0074745		4.71449e-08	35.3304	3.53258	10.1978	136.506	128.727	15.0657	13.4451	9534.56		3.52129	0.0439181	0.0999916	0.000747387	0.963409		1611.41	20.0977	1537.59	22.7473	1623.93	6.95183		29µm	5Hz	1.81	Spot		107.777	0.0001	74641.6	7595.25	21791.9	308821	342685	546.646	8615.9	6.38794e+07	6.52775e+06	86698.9	37
2016-003-zr-032	FE10B239	0.25441	0.0114136	0.0752604	0.0154784	0.0920902	0.00586649		0.00447957	56.4998	5.2115	8.55832	118.764	228.653	8.69169	5.80771	11891		3.93066	0.0448629	0.0920902	0.000540246	0.949232		1461.18	16.6772	1466.66	22.7016	1469.25	5.56882		29µm	5Hz	1.81	Spot		0.0001	9.60377	122381	11389.9	18715.7	275134	616478	315.954	3687.46	6.20424e+07	8.35236e+06	77531.8	43
2016-003-zr-034	FE10B243	0.3347	0.0169086	0.109842	0.0260325	0.113056	0.0201696		0.0939592	44.012	4.98077	11.8092	112.818	134.121	14.8624	40.0916	11418.4		2.98775	0.0505188	0.113056	0.0022803	0.987988		1861.12	31.469	2106.47	54.8368	1849.11	18.2379		29µm	5Hz	1.81	Spot		224.726	34.2947	16229.8	1853.22	4396.51	44495	61559.2	91.9971	4334.81	1.05642e+07	1.36549e+06	76440.6	47
2016-003-zr-035	MA02B095	0.334066	0.0123074	0.0914545	0.0137188	0.112675	0.00401602		0.00627938	136.686	15.427	19.6417	227.888	426.079	9.42588	31.8573	12027.6		2.99342	0.0368413	0.112675	0.000452506	0.98768		1858.06	22.8679	1768.8	24.2658	1843.01	3.63408		29µm	5Hz	1.81	Spot		150.989	12.9189	280096	32171.2	40711.3	500037	1.10012e+06	331.823	19803.8	6.19676e+07	7.98725e+06	84429	39
2016-003-zr-036	FE10B245	0.210383	0.0116982	0.0637784	0.0163185	0.083033	0.00414059		0.00457438	202.131	16.774	8.6034	139.75	968.071	19.0215	620.939	11388.4		4.75324	0.0556045	0.083033	0.000343805	0.92842		1230.86	14.3988	1249.66	20.3926	1269.99	4.04049		29µm	5Hz	1.81	Spot		88.2318	8.73715	390053	32659.8	16761.1	288422	2.32511e+06	616.203	351376	5.52865e+07	7.12692e+06	73913.4	49
2016-003-zr-037	MA02B096	0.289065	0.0123385	0.0860665	0.0149363	0.101489	0.00866638		4.73114e-08	30.8193	3.11206	6.99881	86.2079	110.805	17.466	9.27723	9564		3.45943	0.0426843	0.101489	0.000879546	0.965857		1636.85	20.1964	1668.77	24.9252	1651.53	8.03179		29µm	5Hz	1.81	Spot		101.267	0.0001	64883.2	6667.36	14903.4	194331	293918	631.779	5925.32	6.36677e+07	6.52513e+06	84702.4	40
2016-003-zr-038	MA02B097	0.206902	0.0122542	0.0621468	0.0144068	0.0800455	0.00634626		4.69366e-08	53.8023	4.30957	11.2951	192.64	271.073	22.3322	0.218306	10718.3		4.8332	0.0592268	0.0800455	0.00050799	0.926792		1212.29	14.8557	1218.64	17.5567	1198.11	6.25708		29µm	5Hz	1.81	Spot		167.235	0.0001	114174	9306.56	24244.2	437711	724764	814.364	140.554	6.41805e+07	7.37114e+06	82231.1	41
2016-003-zr-040	FE10B249	0.299255	0.0117217	0.0892058	0.0155294	0.107216	0.00567661		0.00744112	56.2078	6.02126	9.7118	113	192.621	15.0212	29.1107	10457.1		3.34164	0.0391696	0.107216	0.000608622	0.970779		1687.61	19.7817	1727.11	26.8209	1752.62	5.19415		29µm	5Hz	1.81	Spot		52.0537	15.9549	121758	13160.5	21239.2	261795	519317	546.368	18497.2	6.20729e+07	7.3465e+06	72316.5	53
2016-003-zr-041	MA02B102	0.251856	0.0134922	0.0777078	0.0189117	0.0891629	0.00961482		4.97005e-08	18.3143	1.63343	3.24967	45.1893	76.9097	9.96027	38.9457	10420.9		3.97052	0.0535711	0.0891629	0.000857285	0.948014		1448.04	19.5373	1512.61	28.606	1407.66	9.2037		29µm	5Hz	1.81	Spot		166.173	0.0001	36704.4	3331.06	6587.34	96956.6	194175	343.255	23688.4	6.0632e+07	6.76847e+06	77209.9	46
2016-003-zr-042	FE10B251	0.283794	0.0310954	0.0974218	0.0179873	0.103025	0.0115299		0.0265915	38.4144	4.0235	5.28079	56.6765	139.142	16.1801	124.71	11500.9		3.52369	0.10957	0.103025	0.00118787	0.963317		1610.44	50.0773	1879	33.7982	1679.32	10.6478		29µm	5Hz	1.81	Spot		90.7541	27.5257	40173	4245.47	5575.36	63390.4	181099	284.147	38260.9	2.99692e+07	3.90073e+06	71191.2	55
2016-003-zr-044	MA02B105	0.21077	0.0128489	0.0628144	0.0147331	0.0816815	0.0116851		0.00227675	16.5516	1.34173	10.3658	175.57	81.844	24.6806	0.000160266	9466.77		4.7445	0.0609615	0.0816815	0.00095446	0.928602		1232.92	15.8416	1231.34	18.1414	1237.89	11.4551		29µm	5Hz	1.81	Spot		102.129	4.69839	34022.8	2806.26	21551	386327	211916	872.734	0.1	6.21993e+07	6.30666e+06	78284	49
2016-003-zr-045	MA02B106	0.33401	0.0137108	0.0964826	0.0143636	0.114479	0.00647626		4.75745e-08	44.4428	5.06517	7.65512	84.3107	138.027	6.13936	0.000157333	11687.9		2.99393	0.0410491	0.114479	0.000741394	0.987652		1857.79	25.4717	1861.7	26.7406	1871.69	5.84004		29µm	5Hz	1.81	Spot		75.5924	0.0001	93051.9	10790.6	16211	188961	364017	221.158	0.1	6.33589e+07	7.93111e+06	78044.8	50
2016-003-zr-046	MA02B107	0.306008	0.0120747	0.0903035	0.0144421	0.106158	0.00510266		4.6533e-08	79.3444	8.4178	9.14435	107.533	268.743	6.14152	9.48981	10199.8		3.26789	0.0394587	0.106158	0.000541686	0.974048		1721.03	20.7809	1747.47	25.2371	1734.45	4.67959		29µm	5Hz	1.81	Spot		100.038	0.0001	169846	18334	19798.2	246396	724602	226.22	6167.12	6.47815e+07	7.07634e+06	76763.6	51
2016-003-zr-047	MA02B108	0.246762	0.012905	0.0714464	0.0160796	0.0898174	0.00914236		0.00637161	24.3231	2.1876	4.99928	72.6631	99.7762	14.7457	0.000159211	9985.83		4.05249	0.0522975	0.0898174	0.000821143	0.94559		1421.75	18.3478	1394.84	22.4284	1421.65	8.73471		29µm	5Hz	1.81	Spot		61.4271	13.2331	50319	4604.63	10460.5	160905	259988	524.992	0.1	6.26113e+07	6.69541e+06	76770.1	52
2016-003-zr-048	MA02B109	0.321555	0.0122974	0.0950034	0.0144319	0.109292	0.00702637		0.000872836	40.4743	4.42006	10.3571	115.64	130.56	14.3635	13.0437	11872.7		3.10989	0.0382436	0.109292	0.000767923	0.981592		1797.32	22.1023	1834.41	26.474	1787.64	6.40135		29µm	5Hz	1.81	Spot		102.726	1.82839	84454	9383.69	21857.9	258272	343123	515.865	8263.85	6.31549e+07	8.02919e+06	74824.2	53
2016-003-zr-049	MA02B110	0.327089	0.0121165	0.0936742	0.0135199	0.114073	0.00467523		0.00318939	89.9859	10.2749	30.0407	339.631	286.36	13.0097	64.6442	11249.7		3.05727	0.0370433	0.114073	0.000533318	0.984284		1824.26	22.1036	1809.86	24.4692	1865.29	4.2192		29µm	5Hz	1.81	Spot		107.749	6.62102	186080	21617.3	62829.5	751707	745803	463.113	40590.2	6.25919e+07	7.53966e+06	74116.4	54
2016-003-zr-050	MA02B111	0.319699	0.013143	0.0942471	0.015631	0.109304	0.00701794		4.72223e-08	32.1623	3.51884	6.73222	75.4339	104.262	14.0884	8.78098	10678.4		3.12794	0.0411107	0.109304	0.000767086	0.98069		1788.26	23.5032	1820.45	28.4554	1787.84	6.39351		29µm	5Hz	1.81	Spot		91.3624	0.0001	67843.8	7551.83	14363.1	170307	276989	511.656	5624.71	6.38533e+07	7.3006e+06	73030.7	55
2016-003-zr-051	MA02B112	0.315825	0.0128871	0.0918883	0.0155007	0.108114	0.00855202		0.0119348	24.8518	2.6927	4.34706	50.3942	82.4658	9.14788	0.000156475	10428.4		3.16631	0.0408047	0.108114	0.000924597	0.978809		1769.31	22.8013	1776.83	27.5422	1767.88	7.81034		29µm	5Hz	1.81	Spot		28.3404	25.2136	52298.8	5765.07	9252.4	113502	218560	331.487	0.1	6.37062e+07	7.11285e+06	71994.9	56
2016-003-zr-052	MA02B113	0.25707	0.0124264	0.0776014	0.015389	0.0921382	0.006986		0.00249279	48.6667	4.48574	5.79302	78.8386	196.177	6.02154	4.6987	11983.8		3.88999	0.0483386	0.0921382	0.000643678	0.950501		1474.83	18.3269	1510.62	23.2469	1470.24	6.63064		29µm	5Hz	1.81	Spot		80.2537	5.25372	102171	9580.92	12300.6	177139	518674	217.709	2995.87	6.35583e+07	8.15428e+06	71475	57
2016-003-zr-054	MA02B115	0.264232	0.0132186	0.0809306	0.0174138	0.0917772	0.00923372		0.00170544	21.023	1.93044	2.965	38.8668	82.9863	11.7869	0.628134	10896.1		3.78456	0.0500267	0.0917772	0.000847446	0.953924		1511.46	19.9794	1572.96	27.3912	1462.78	8.77285		29µm	5Hz	1.81	Spot		82.3544	3.61157	44348	4142.83	6325.92	87742.9	220451	428.32	402.471	6.38718e+07	7.44989e+06	74032.4	59
2016-003-zr-055	MA02B116	0.31332	0.0123547	0.0895107	0.0145521	0.10727	0.00795246		0.00528122	32.0573	3.4317	10.0912	119.851	106.448	19.8467	22.9176	10173.9		3.19163	0.0394317	0.10727	0.000853058	0.977593		1757.02	21.7075	1732.77	25.2154	1753.54	7.27574		29µm	5Hz	1.81	Spot		102.783	11.3476	68614.7	7472.31	21845.1	274520	286908	731.862	14900.1	6.48109e+07	7.058e+06	74746.7	60
2016-003-zr-056	MA02B117	0.260153	0.0122403	0.0765339	0.0144997	0.0909205	0.00502914		4.74009e-08	86.0455	7.8264	11.4303	158.732	344.368	7.26101	3.46495	11609.9		3.8439	0.0470506	0.0909205	0.000457252	0.951973		1490.62	18.2457	1490.58	21.613	1444.94	4.78969		29µm	5Hz	1.81	Spot		96.9959	0.0001	180828	16732	24294.8	356970	911300	262.932	2212.04	6.36388e+07	7.90814e+06	76389.1	61
2016-003-zr-056	FE10B268	0.232826	0.011853	0.0666112	0.0166258	0.0930535	0.00526068		0.0150929	117.387	10.9162	15.4211	233.707	497.198	18.7383	77.2758	12559		4.29505	0.050909	0.0930535	0.000489524	0.938981		1349.3	15.9931	1303.42	21.6704	1488.98	4.98051		29µm	5Hz	1.81	Spot		69.6952	26.4195	207583	19476.6	27529.4	441983	1.09406e+06	556.938	40135.9	5.0712e+07	7.20394e+06	71974.3	72
2016-003-zr-057	MA02B118	0.328882	0.0186126	0.0921603	0.0186252	0.112513	0.0105445		0.0250603	107.075	12.0455	10.0108	120.074	364.738	14.8202	81.1484	11936.6		3.0406	0.0565936	0.112513	0.00118639	0.985156		1832.96	34.1162	1781.86	33.1875	1840.4	9.54465		29µm	5Hz	1.81	Spot		22.7963	64.2444	273441	31292.6	25855.8	328126	1.17286e+06	652.225	62956.6	7.73371e+07	9.88021e+06	77163	62
2016-003-zr-058	FE10B270	0.256786	0.0115006	0.0772357	0.0155083	0.0914037	0.00515666		0.00269063	83.268	7.61115	10.0945	135.592	330.886	5.89777	0.72029	12226.4		3.8943	0.0447869	0.0914037	0.000471338	0.950365		1473.38	16.9448	1503.75	23.3207	1455.03	4.90442		29µm	5Hz	1.81	Spot		16.6697	5.786	180892	16682.4	22137.7	315017	894440	215.367	459.648	6.23041e+07	8.61572e+06	72892.7	74
2016-003-zr-059	MA02B119	0.329551	0.0132449	0.0998446	0.0158038	0.11274	0.00461945		0.00629108	143.15	16.1392	7.99845	86.8411	453.179	6.54096	77.6164	13235		3.03443	0.0401907	0.11274	0.000520798	0.985482		1836.21	24.3203	1923.58	30.3998	1844.05	4.17959		29µm	5Hz	1.81	Spot		140.354	12.8824	292005	33490	16501.3	189553	1.16398e+06	229.969	48102.4	6.17788e+07	8.75062e+06	75813.7	63
2016-003-zr-060	MA02B120	0.319377	0.0129072	0.0923306	0.0137554	0.11202	0.00427438		4.64827e-08	190.784	21.3679	20.2998	233.283	620.552	11.188	123.131	12271.3		3.13109	0.0404138	0.11202	0.000478816	0.980534		1786.69	23.0612	1785.01	24.5536	1832.44	3.87283		29µm	5Hz	1.81	Spot		103.96	0.0001	408867	46583.1	43999.1	534953	1.6745e+06	413.313	80176.7	6.49094e+07	8.52412e+06	75330.6	64
2016-003-zr-062	FE10B274	0.320911	0.0122653	0.0945265	0.0159366	0.118281	0.005582		0.0150879	95.5603	11.3163	10.0724	113.118	310.248	24.9277	53.2611	12786		3.11613	0.0382202	0.118281	0.000660246	0.98128		1794.18	22.0061	1825.61	29.094	1930.42	4.99847		29µm	5Hz	1.81	Spot		0.0001	33.0223	211285	25244.2	22481.5	267471	853521	926.647	34601.8	6.34218e+07	9.1705e+06	67453.8	78
2016-003-zr-063	MA02B125	0.290992	0.0128047	0.0840573	0.0145784	0.100193	0.00782639		4.76937e-08	32.0262	3.20401	13.5733	170.596	113.929	14.2085	1.97096	10147.7		3.43651	0.0440037	0.100193	0.00078415	0.966787		1646.49	21.0828	1631.35	23.7824	1627.67	7.27559		29µm	5Hz	1.81	Spot		93.6052	0.0001	66894	6807.19	28672.9	381225	299585	511.936	1251.23	6.3283e+07	6.87041e+06	73583.1	69
2016-003-zr-064	MA02B126	0.263311	0.0122443	0.0781884	0.0147465	0.0923507	0.00563933		0.00236275	63.5012	5.8789	7.57503	103.018	251.915	9.25618	173.11	11928.1		3.79779	0.0465013	0.0923507	0.000520795	0.953483		1506.76	18.4492	1521.62	22.4386	1474.61	5.34932		29µm	5Hz	1.81	Spot		77.3603	5.06967	135734	12781.7	16375.4	235581	677882	341.336	112469	6.47647e+07	8.26444e+06	71265.7	70
2016-003-zr-065	MA02B127	0.257836	0.0128779	0.0772255	0.0158783	0.0918011	0.00727113		4.63167e-08	31.969	2.92874	5.51236	75.4595	128.28	8.40175	0.000152953	10610.9		3.87843	0.049946	0.0918011	0.000667498	0.950867		1478.76	19.0433	1503.56	23.874	1463.27	6.90775		29µm	5Hz	1.81	Spot		186.965	0.0001	68760.5	6407.21	11990.8	173633	347335	311.805	0.1	6.51733e+07	7.39779e+06	69787.2	71
2016-003-zr-066	FE10B278	0.254695	0.0114789	0.0779932	0.0154795	0.0934084	0.00608262		0.0143878	55.4405	5.18196	8.0913	108.045	223.315	8.70032	28.0077	11362.9		3.92627	0.0450692	0.0934084	0.000568168	0.949368		1462.64	16.7895	1517.96	23.4973	1496.18	5.75313		29µm	5Hz	1.81	Spot		0.0001	29.9911	116743	11009.3	17199.6	243310	585081	308.084	17333.9	6.04118e+07	7.76202e+06	67326	82
2016-003-zr-067	MA02B128	0.303355	0.0128386	0.0927809	0.0139706	0.111365	0.0046882		0.0122439	121.723	13.5509	21.176	242.759	418.738	20.4334	166.915	11785.1		3.29646	0.0423219	0.111365	0.000522103	0.972763		1707.93	21.9273	1793.34	25.0542	1821.82	4.25329		29µm	5Hz	1.81	Spot		130.866	24.4517	242165	27420.6	42607.1	516666	1.0487e+06	701.525	100947	6.02874e+07	7.60008e+06	69855.7	72
2016-003-zr-068	MA02B129	0.321956	0.0126955	0.0915188	0.0157077	0.10967	0.00788541		4.70841e-08	25.4941	2.80434	4.71374	54.4949	82.7207	16.9564	8.13778	11528.8		3.10601	0.0394323	0.10967	0.000864793	0.981788		1799.28	22.8427	1769.99	27.8024	1793.94	7.1784		29µm	5Hz	1.81	Spot		49.3324	0.0001	53940.7	6034.91	10086.5	123343	220317	619.205	5234.45	6.41198e+07	7.90693e+06	71020	73
2016-003-zr-069	MA02B130	0.255153	0.0126252	0.07555	0.0158289	0.0915949	0.00717229		0.000440386	30.0134	2.75315	4.40319	61.4977	122.263	10.7633	0.972537	11336		3.91921	0.0494808	0.0915949	0.000656945	0.949586		1465	18.4959	1472.1	23.3017	1459	6.81779		29µm	5Hz	1.81	Spot		45.1474	0.920296	62483.2	5829.55	9270.67	136955	320396	386.791	615.558	6.30943e+07	7.65013e+06	69129.2	74
2016-003-zr-070	FE10B282	0.254415	0.0115354	0.0754154	0.0153802	0.0919773	0.00489361		4.66584e-08	76.7282	7.06218	11.9339	165.371	309.34	6.69279	11.5891	11601.1		3.93058	0.045341	0.0919773	0.000450101	0.949234		1461.21	16.8557	1469.57	22.6023	1466.92	4.64676		29µm	5Hz	1.81	Spot		49.0454	0.0001	166121	15426.5	26082.1	382891	833265	243.724	7376.55	6.21241e+07	8.14837e+06	68247.6	86
2016-003-zr-071	MA02B131	0.23861	0.0124752	0.0782691	0.0644508	0.0880106	0.00778147		0.00240446	31.706	2.78924	2.38052	34.5952	138.008	9.08303	21.4019	12808.9		4.19095	0.0522829	0.0880106	0.000684852	0.941719		1379.46	17.2091	1523.13	98.1673	1382.72	7.47435		29µm	5Hz	1.81	Spot		91.5864	5.07885	66718.4	5969.52	5066.05	77871.4	365543	329.971	13693	6.37783e+07	8.73714e+06	69392.8	75
2016-003-zr-072	MA02B132	0.261432	0.0121134	0.0769016	0.0145978	0.0919796	0.00542182		0.00789345	77.9276	7.15715	9.91441	136.653	310.178	9.20643	6.61024	12299.1		3.82508	0.0463346	0.0919796	0.000498697	0.952585		1497.17	18.1357	1497.48	21.86	1466.97	5.14829		29µm	5Hz	1.81	Spot		27.7792	16.5465	162738	15201.3	20939	305254	815321	331.963	4197.44	6.32986e+07	8.32589e+06	67770.5	76
2016-003-zr-073	FE10B287	0.464269	0.012947	0.126963	0.0150043	0.164244	0.00468562		0.00671244	73.2717	12.0433	47.6364	398.709	164.782	9.60018	115.554	9092.62		2.15392	0.0278868	0.164244	0.000769585	1.05097		2458.38	31.8286	2415.89	36.2487	2499.82	3.9437		29µm	5Hz	1.81	Spot		35.9063	13.8518	152741	25329.2	100240	888823	427349	336.692	70841.6	5.98272e+07	6.14935e+06	66549.4	91
2016-003-zr-074	MA02B133	0.340948	0.0127563	0.0971612	0.0146835	0.109947	0.00553771		4.8761e-08	69.3163	7.61845	13.3235	145.947	211.067	10.9709	27.7445	10427.8		2.933	0.0374142	0.109947	0.000608857	0.991033		1891.23	24.1251	1874.2	27.5198	1798.53	5.03834		29µm	5Hz	1.81	Spot		112.237	0.0001	141620	15830.3	27529.5	318947	542769	387.072	17237	6.19317e+07	6.90624e+06	67873	77
2016-003-zr-076	FE10B290	0.317747	0.0112907	0.092668	0.0150599	0.10956	0.00522523		4.66608e-08	62.4389	6.84498	15.3431	171.133	200.368	10.2726	4.19771	12961.1		3.14716	0.0355336	0.10956	0.000572474	0.979742		1778.72	20.0829	1791.26	26.9761	1792.1	4.75781		29µm	5Hz	1.81	Spot		70.6113	0.0001	135173	14950.7	33529.6	396193	539641	374.212	2673.14	6.21398e+07	9.10356e+06	65455.8	94
2016-003-zr-077	MA02B135	0.284232	0.0187769	0.0872815	0.0161763	0.101762	0.00921639		0.0306821	117.612	11.9637	21.1864	243.44	406.695	47.329	247.414	12967.9		3.51826	0.0660618	0.101762	0.000937876	0.963528		1612.64	30.2803	1691.37	27.3601	1656.5	8.53608		29µm	5Hz	1.81	Spot		55.2672	48.8133	186411	19284.4	33959.6	412685	811279	1295.76	119260	4.80505e+07	6.66277e+06	67833.8	79
2016-003-zr-078	MA02B136	0.301597	0.0130397	0.0842694	0.0145373	0.111552	0.00593843		0.00749064	75.7432	8.43889	15.3736	188.349	251.628	20.8301	162.455	11047.5		3.31568	0.0432356	0.111552	0.000662442	0.971912		1699.22	22.1574	1635.3	23.7728	1824.85	5.38554		29µm	5Hz	1.81	Spot		168.344	14.4321	145386	16473.2	29842.7	386669	607866	690.732	94839.7	5.8195e+07	6.87404e+06	69064	80
2016-003-zr-079	MA02B137	0.255603	0.0121975	0.0748338	0.0141595	0.0919154	0.00556538		0.00413501	94.9319	8.70531	12.8974	180.292	376.637	3.73173	14.2322	10099.6		3.91231	0.0477206	0.0919154	0.000511544	0.949801		1467.31	17.8976	1458.64	20.6536	1465.64	5.28556		29µm	5Hz	1.81	Spot		97.1852	8.82997	201960	18834.1	27748.6	410219	1.00841e+06	137.171	9209.41	6.45042e+07	6.9653e+06	68976.9	81
2016-003-zr-080	MA02B138	0.246701	0.0129009	0.0737228	0.0156779	0.0887209	0.00995345		0.000921007	29.775	2.63605	6.36289	93.053	127.538	10.2332	1.33107	10851.9		4.05348	0.0522937	0.0887209	0.000883079	0.945561		1421.44	18.3379	1437.73	22.5406	1398.14	9.54031		29µm	5Hz	1.81	Spot		23.3944	2.06315	66449.8	5982.67	14360.8	222098	358201	394.648	903.603	6.76711e+07	7.85096e+06	68635.8	82
2016-003-zr-081	MA02B139	0.335705	0.0122801	0.0984291	0.0145318	0.112981	0.00510436		4.7098e-08	66.7356	7.55523	10.0806	108.366	206.483	9.22104	4.27663	11656.8		2.97881	0.03658	0.112981	0.000576694	0.988478		1865.97	22.9143	1897.55	27.5747	1847.9	4.61617		29µm	5Hz	1.81	Spot		117.527	0.0001	141166	16252.2	21564.5	245148	549657	337.109	2751.92	6.41449e+07	7.99343e+06	68495.6	83
2016-003-zr-082	FE10B296	0.232805	0.0118044	0.0690065	0.0155364	0.0849014	0.00539056		0.000370512	65.8824	5.59068	11.1296	165.876	287.206	11.2716	14.878	10044.7		4.29544	0.0507051	0.0849014	0.000457666	0.938971		1349.18	15.9263	1348.76	20.9548	1313.29	5.22813		29µm	5Hz	1.81	Spot		0.0001	0.699889	125712	10762.7	21436.6	338471	681731	362.017	8354.15	5.47832e+07	6.21869e+06	66226.2	100
2016-003-zr-083	MA02B140	0.204842	0.0123362	0.0609411	0.0138266	0.080557	0.00758045		4.65777e-08	47.0043	3.79699	14.9788	260.019	237.104	11.3417	0.000153678	10910		4.8818	0.0602228	0.080557	0.000610658	0.925829		1201.28	14.8192	1195.68	16.5322	1210.66	7.46037		29µm	5Hz	1.81	Spot		68.1297	0.0001	100540	8258.94	32400.8	594775	638205	419.328	0.1	6.48659e+07	7.56499e+06	67287.6	84
2016-003-zr-084	MA02B144	0.337626	0.0120327	0.0996559	0.0154992	0.110989	0.00474507		0.00339214	113.133	12.5751	7.49233	79.6069	348.662	2.03159	5.22626	13862.6		2.96186	0.0356392	0.110989	0.000526649	0.989414		1875.24	22.5642	1920.11	29.76	1815.67	4.30811		29µm	5Hz	1.81	Spot		71.214	7.40909	246188	27825.6	16488	185237	954675	76.459	3460.73	6.60092e+07	9.7796e+06	70524.6	88
2016-003-zr-085	MA02B141	0.261289	0.0121182	0.076417	0.0138311	0.0912332	0.00611049		0.00142743	64.5721	5.89051	17.3255	239.82	256.196	7.18929	45.8347	7706.19		3.82717	0.0463785	0.0912332	0.000557479	0.952517		1496.44	18.1341	1488.39	20.586	1451.47	5.81439		29µm	5Hz	1.81	Spot		103.793	3.14016	141521	13128.3	38400.6	562078	706576	272.394	30562.4	6.64691e+07	5.47524e+06	67488.7	85
2016-003-zr-087	MA02B143	0.330973	0.0145999	0.0949455	0.0201833	0.117735	0.0132806		0.00478494	7.98491	0.935277	1.83353	20.6719	25.0947	17.1885	5.04059	9881.01		3.02139	0.044112	0.117735	0.0015636	0.986174		1843.1	26.909	1833.34	37.0029	1922.13	11.904		29µm	5Hz	1.81	Spot		67.1492	10.1147	16816.4	2002.93	3905.04	46553.6	66501.3	625.973	3230.09	6.38795e+07	6.74617e+06	72321.5	87
2016-003-zr-088	FE10B302	0.315599	0.0166844	0.0999307	0.0211666	0.120405	0.0161134		0.0749144	28.0267	3.37071	9.09787	97.8026	93.2064	10.8922	29.6209	11507.9		3.16858	0.0528658	0.120405	0.00194013	0.978699		1768.2	29.5013	1925.16	40.749	1962.23	14.375		29µm	5Hz	1.81	Spot		172.349	46.6939	17645.6	2141.08	5781.88	65847.8	72995.8	115.466	5490.28	1.80807e+07	2.35096e+06	68560.3	106
2016-003-zr-089	MA02B148	0.288639	0.0126065	0.0836636	0.0144432	0.0982974	0.00557807		0.00665173	90.6853	8.92447	23.1749	288.675	327.088	19.5465	6184.59	12146.6		3.46453	0.0436757	0.0982974	0.00054831	0.965652		1634.72	20.6082	1624	23.4559	1592.07	5.2095		29µm	5Hz	1.81	Spot		113.98	13.7239	186413	18653.1	48175.2	634450	845919	695.279	3.86954e+06	6.237e+07	8.09474e+06	75581.7	92
2016-003-zr-090	MA02B149	0.285016	0.0124786	0.082922	0.0145774	0.0981198	0.00806388		4.75563e-08	31.2029	3.05444	9.41808	120.048	112.949	7.30761	2.32454	10846.7		3.50858	0.0437821	0.0981198	0.000791226	0.963905		1616.57	20.1726	1610.17	23.472	1588.7	7.53439		29µm	5Hz	1.81	Spot		81.4016	0.0001	65371.2	6506.45	19953.4	268896	297704	264.958	1482.4	6.35704e+07	7.36716e+06	73241.7	93
2016-003-zr-091	MA02B150	0.25083	0.0129151	0.0733499	0.0145079	0.0881845	0.00717655		0.00101871	44.4729	3.91925	13.9652	200.921	183.894	8.15728	0.881778	11617.2		3.98677	0.0514896	0.0881845	0.000632861	0.947526		1442.75	18.6333	1430.71	20.7566	1386.51	6.8897		29µm	5Hz	1.81	Spot		98.7143	2.09184	90986	8152.59	28892.6	439469	473310	288.865	549.162	6.20825e+07	7.70542e+06	73558	94
2016-003-zr-092	MA02B151	0.276128	0.0151278	0.0711382	0.0190199	0.103668	0.0112802		0.0203113	36.2861	3.74154	8.04025	114.681	129.755	21.6624	88.7202	8774.71		3.62151	0.0547857	0.103668	0.0011694	0.959629		1571.83	23.7784	1389.02	26.4191	1690.8	10.402		29µm	5Hz	1.81	Spot		54.4544	36.8504	65591.6	6876.47	14697.3	221621	295066	677.866	48822.6	5.48563e+07	5.14234e+06	74949.9	95
2016-003-zr-094	MA02B153	0.3405	0.0121232	0.0964685	0.0146327	0.115993	0.00616487		0.0140788	46.9684	5.43897	7.82913	85.8974	143.926	9.43101	4.03165	12602.2		2.93686	0.035604	0.115993	0.000715079	0.990815		1889.07	22.9015	1861.44	27.2378	1895.35	5.54349		29µm	5Hz	1.81	Spot		55.4772	29.6356	98506.3	11597.6	16604.6	192586	379716	342.503	2574.46	6.36548e+07	8.56899e+06	72777.2	97
2016-003-zr-095	MA02B154	0.248687	0.0126123	0.0737812	0.0186215	0.0884311	0.00946393		0.000459527	20.4398	1.8116	2.30124	32.8613	85.2105	18.3458	12.1729	11224.2		4.02111	0.0507156	0.0884311	0.000836906	0.946506		1431.7	18.0571	1438.83	26.7933	1391.87	9.07895		29µm	5Hz	1.81	Spot		64.3687	0.945299	41893.3	3775	4769.63	71999.2	219691	651.196	7596.9	6.22113e+07	7.45854e+06	72264.6	98
2016-003-zr-097	MA02B156	0.316387	0.0119761	0.0922587	0.0140579	0.107307	0.0045925		0.010607	109.399	11.7362	12.2024	140.347	360.416	6.41321	35.18	13144.2		3.16069	0.0378527	0.107307	0.000492809	0.979082		1772.06	21.2223	1783.68	25.0749	1754.18	4.20136		29µm	5Hz	1.81	Spot		106.766	22.6443	232699	25379.3	26246.9	319105	964295	236.31	22787.8	6.45707e+07	9.06463e+06	69287.4	100
2016-003-zr-097	FE10B314	0.285566	0.0155009	0.0842159	0.0192446	0.108759	0.0101021		0.0579477	183.459	19.929	16.5783	191.089	628.16	22.7546	285.572	14357.6		3.50182	0.0542813	0.108759	0.0010987	0.96417		1619.33	25.1011	1634.3	31.4514	1778.73	9.21362		29µm	5Hz	1.81	Spot		0.0001	42.9787	137439	15062.4	12536	153080	585291	287.199	63034	2.15246e+07	3.49049e+06	70275.2	118
2016-003-zr-098	MA02B157	0.277182	0.0120987	0.0811949	0.0137293	0.0991685	0.00499339		4.78248e-08	61.9474	6.14654	18.697	243.893	232.752	7.59323	24.1177	11980.8		3.60774	0.0436489	0.0991685	0.000495186	0.960135		1577.15	19.0815	1577.9	21.6636	1608.54	4.65348		29µm	5Hz	1.81	Spot		115.141	0.0001	129059	13018.5	39390	543128	609918	274.08	15302.2	6.32481e+07	8.09262e+06	68358.1	101
2016-003-zr-099	MA02B158	0.317773	0.0125359	0.0916846	0.0149832	0.106771	0.00736788		0.00194291	26.5599	2.83792	7.18788	82.8386	86.6705	15.0487	5.66282	11117.9		3.1469	0.0394493	0.106771	0.000786673	0.979755		1778.84	22.2994	1773.06	26.5661	1745.01	6.74808		29µm	5Hz	1.81	Spot		101.828	4.08322	55615.8	6041.28	15220.2	185408	228267	546.028	3611.49	6.35743e+07	7.54822e+06	69060.6	102
2016-003-zr-100	MA02B159	0.336114	0.0143021	0.085476	0.0197796	0.113407	0.00423609		0.00336321	108.095	12.2983	1.55659	19.1429	335.695	10.1369	74.2884	11098.9		2.97518	0.0425513	0.113407	0.000480401	0.988678		1867.95	26.7157	1657.78	32.7902	1854.71	3.82778		29µm	5Hz	1.81	Spot		69.7277	7.18981	230246	26630.6	3352.8	43582	899333	374.193	48196.7	6.46732e+07	7.66497e+06	68589	103
2016-003-zr-101	MA02B160	0.242783	0.012719	0.0769851	0.0157366	0.0918398	0.00715666		0.00555631	38.6585	3.55046	6.1175	84.6604	165.055	6.69079	15.9372	10929.1		4.1189	0.0523882	0.0918398	0.000657267	0.943699		1401.15	17.8212	1499.05	23.5899	1464.08	6.79827		29µm	5Hz	1.81	Spot		86.6476	11.7005	81112.9	7573.07	12979.7	189857	435562	243.325	10185.8	6.37104e+07	7.43496e+06	69243.8	104
2016-003-zr-102	MA02B161	0.319249	0.0141476	0.0941265	0.0152893	0.112168	0.015918		0.00575587	32.6102	3.67202	5.97119	67.2641	106.747	13.6066	4.79838	10602.9		3.13235	0.0443153	0.112168	0.00178549	0.980472		1786.06	25.2685	1818.22	27.7993	1834.84	14.4184		29µm	5Hz	1.81	Spot		37.7685	12.5366	70770.3	8100.97	13103.9	156016	291350	511.88	3172.17	6.59006e+07	7.46057e+06	68921	105
2016-003-zr-103	MA02B162	0.263136	0.0124618	0.0804778	0.015716	0.0924406	0.00639245		4.57782e-08	46.0892	4.30237	5.26852	69.7076	181.764	5.60492	7.57588	12398.3		3.80031	0.0473586	0.0924406	0.000590922	0.9534		1505.87	18.7658	1564.49	24.5876	1476.45	6.0622		29µm	5Hz	1.81	Spot		57.1009	0.0001	100316	9519.34	11595.8	162154	497543	211.506	5023.38	6.60985e+07	8.74958e+06	68518	106
2016-003-zr-104	MA02B163	0.210378	0.0130838	0.0632856	0.0156795	0.0816131	0.0126575		4.62659e-08	13.0408	1.06361	3.81151	63.1822	63.5364	12.7629	0.000152409	10879.7		4.75334	0.0621916	0.0816131	0.00103302	0.928418		1230.83	16.1039	1240.3	19.4472	1236.25	12.4112		29µm	5Hz	1.81	Spot		87.2372	0.0001	28085.1	2328.49	8300.55	145422	172081	476.61	0.1	6.54062e+07	7.5971e+06	68260.7	107
2016-003-zr-107	MA02B165	0.239133	0.0126566	0.0699223	0.0168133	0.088175	0.00822341		4.64146e-08	21.458	1.89108	4.27223	65.0563	93.6537	9.65932	1.14911	9801.42		4.18177	0.052927	0.088175	0.000725099	0.941968		1382.19	17.4938	1366.06	22.968	1386.3	7.89495		29µm	5Hz	1.81	Spot		38.5254	0.0001	46065.1	4126.67	9274.12	149249	252827	359.658	751.655	6.52056e+07	6.82239e+06	69606.4	109
2016-003-zr-108	MA02B166	0.32604	0.0126491	0.0938735	0.0138495	0.109017	0.00659094		0.00640605	45.619	4.96745	18.5385	208.931	145.14	20.781	4.80312	11066.8		3.06711	0.0387963	0.109017	0.000718523	0.983773		1819.16	23.0108	1813.54	25.1167	1783.05	6.00805		29µm	5Hz	1.81	Spot		18.5189	13.2758	94200.7	10426.6	38709.5	461038	376875	744.382	3022.27	6.27247e+07	7.40964e+06	70136.8	110
2016-003-zr-109	MA02B167	0.315832	0.0125956	0.0938463	0.0162535	0.109979	0.0108549		0.00126943	22.8701	2.52351	4.58847	52.3174	75.3715	8.99948	0.000152471	10307.9		3.16624	0.0398806	0.109979	0.00119381	0.978812		1769.34	22.2859	1813.04	29.4682	1799.06	9.87542		29µm	5Hz	1.81	Spot		34.1201	2.7419	49221.1	5520.53	9985.83	120322	203978	336.032	0.1	6.53795e+07	7.19325e+06	70990	111
2016-003-zr-110	MA02B171	0.32197	0.012126	0.0914808	0.0136267	0.112614	0.00440134		4.84601e-08	129.964	14.6519	37.451	430.508	416.912	16.7546	194.522	9169.54		3.10588	0.0376621	0.112614	0.000495651	0.981794		1799.34	21.8189	1769.28	24.1096	1842.02	3.98322		29µm	5Hz	1.81	Spot		105.083	0.0001	267233	30621.5	77867.4	945829	1.07784e+06	598.023	121920	6.24791e+07	6.11368e+06	73902.5	115
2016-003-zr-111	MA02B172	0.321943	0.0130759	0.0930586	0.0186775	0.109267	0.00863544		0.000597193	37.5327	4.1073	5.41303	59.4531	115.811	10.845	34.0933	11237.1		3.10614	0.0406155	0.109267	0.00094357	0.981781		1799.21	23.5263	1798.48	33.5911	1787.23	7.86768		29µm	5Hz	1.81	Spot		43.6679	1.1375	71236.4	7923.3	10388.6	120564	276357	357.353	19725.5	5.7675e+07	6.91568e+06	69259.7	116
2016-003-zr-112	MA02B173	0.288736	0.0123594	0.0854456	0.0143468	0.100339	0.00639463		4.76258e-08	47.3621	4.74052	11.0164	135.699	169.331	6.30549	0.0888749	11637.1		3.46337	0.0428052	0.100339	0.000641628	0.965698		1635.21	20.2102	1657.21	23.7758	1630.37	5.94253		29µm	5Hz	1.81	Spot		94.4764	0.0001	99093.3	10080.7	23306.5	303342	445419	229.071	56.6875	6.35824e+07	7.89498e+06	67488.2	117
2016-003-zr-113	MA02B174	0.2803	0.0121123	0.0809085	0.016928	0.0971385	0.005293		0.00527315	75.4982	7.33641	3.07032	40.1234	279.327	10.0075	6.93109	13138.6		3.56761	0.0432119	0.0971385	0.000514154	0.961635		1592.87	19.2934	1572.55	26.6202	1569.89	4.95763		29µm	5Hz	1.81	Spot		63.6175	11.0743	157994	15603.8	6496.95	89707.8	734892	363.687	4422.09	6.35997e+07	8.91553e+06	66804.2	118
2016-003-zr-114	MA02B175	0.312352	0.0136449	0.0898629	0.0175155	0.110228	0.00674471		0.00829533	97.7553	10.7568	9.48881	108.573	311.803	11.9846	134.803	11467.2		3.20151	0.0436843	0.110228	0.000743455	0.977124		1752.27	23.9096	1739.3	30.4647	1803.17	6.13302		29µm	5Hz	1.81	Spot		84.0191	16.1065	189133	21151.7	18563.4	224422	758405	402.721	79520.2	5.88038e+07	7.19422e+06	66756.5	119
2016-003-zr-115	MA02B176	0.322345	0.012728	0.0950556	0.0146232	0.109745	0.00663618		0.000927904	34.0773	3.7442	8.51967	94.3836	109.482	16.3004	12.9094	10893.3		3.10227	0.0394855	0.109745	0.000728289	0.981977		1801.17	22.9252	1835.37	26.8391	1795.18	6.04025		29µm	5Hz	1.81	Spot		51.815	2.02113	73963.8	8259.28	18698	218854	298730	614.563	8543.56	6.59721e+07	7.66684e+06	67409.4	120
2016-003-zr-116	MA02B177	0.317382	0.0126611	0.0915342	0.0149558	0.106944	0.00579138		0.00127575	51.1725	5.46564	8.246	95.2436	167.955	8.29455	9.57162	12558.9		3.15078	0.0398923	0.106944	0.000619353	0.979565		1776.93	22.4979	1770.27	26.4758	1747.98	5.30224		29µm	5Hz	1.81	Spot		12.2895	2.7701	110721	12018.7	18040.7	220151	456831	311.789	6315.15	6.57699e+07	8.81152e+06	67659	121
2016-003-zr-117	MA02B178	0.636579	0.0129464	0.168906	0.0159654	0.236308	0.00566767		0.00631452	59.0142	13.9783	9.1635	55.2739	91.9995	6.80998	37.719	8910.24		1.5709	0.0203374	0.236308	0.00133931	1.12675		3175.56	41.112	3154.49	50.3627	3095.27	4.51913		29µm	5Hz	1.81	Spot		123.072	12.5144	116545	28054.8	18298.4	116610	228391	233.677	22715.8	6.0034e+07	5.70603e+06	69076.3	122
2016-003-zr-118	MA02B179	0.282824	0.0122544	0.0785183	0.0164714	0.0968372	0.00679006		0.0015054	35.9159	3.47677	3.37315	45.361	131.818	20.1949	2.13507	9212.04		3.53576	0.0433285	0.0968372	0.000657531	0.96285		1605.57	19.6753	1527.8	25.165	1564.07	6.3647		29µm	5Hz	1.81	Spot		51.3774	3.30282	78521.6	7724.79	7456.78	105938	362262	767.251	1423.56	6.64647e+07	6.53085e+06	70121.4	123
2016-003-zr-119	MA02B180	0.321809	0.0140571	0.0926429	0.0149169	0.108947	0.00767251		4.57489e-08	28.9443	3.13721	5.8922	67.1068	93.2253	15.0076	1.78	10410.9		3.10743	0.0436816	0.108947	0.000835895	0.981716		1798.56	25.2826	1790.79	26.7131	1781.88	6.99499		29µm	5Hz	1.81	Spot		49.6375	0.0001	63045.7	6944.41	12977.2	156139	255245	568.14	1182.49	6.62227e+07	7.35352e+06	70903	124
2016-003-zr-120	MA02B181	0.335107	0.0124384	0.0926041	0.0147321	0.108593	0.00541604		4.58357e-08	45.7539	4.97651	8.74671	99.6008	140.889	12.1196	14.8477	11988		2.98412	0.0371178	0.108593	0.000588146	0.988187		1863.09	23.1739	1790.08	26.3716	1775.95	4.94139		29µm	5Hz	1.81	Spot		72.7301	0.0001	99471.6	10994.8	19227.6	231299	385004	458.006	9845.66	6.61018e+07	8.45155e+06	69699.5	125
2016-003-zr-121	MA02B182	0.279697	0.0125035	0.0790925	0.0139262	0.0992317	0.00695981		4.69638e-08	36.2392	3.59318	13.2342	176.994	134.712	8.57556	4.77119	10695.4		3.57529	0.0447037	0.0992317	0.000690633	0.961345		1589.84	19.8785	1538.56	21.4263	1609.72	6.48504		29µm	5Hz	1.81	Spot		58.4198	0.0001	76894.1	7747.81	28393.5	401145	359275	316.335	3088.04	6.45185e+07	7.35926e+06	69820.4	126
2016-003-zr-122	MA02B183	0.257159	0.0119855	0.0745799	0.0142568	0.0910986	0.00496052		0.00743657	85.5742	7.80187	12.3351	175.272	345.961	9.86517	3.79697	11983.3		3.88864	0.0466073	0.0910986	0.000451896	0.950544		1475.29	17.6821	1453.86	20.7274	1448.66	4.72194		29µm	5Hz	1.81	Spot		91.0962	16.1671	185388	17175.8	27020.1	405572	942021	371.598	2509.26	6.58775e+07	8.41862e+06	67427.7	127
2016-003-zr-123	MA02B184	0.212268	0.0121815	0.0630841	0.0138171	0.0796963	0.0068525		0.0041453	50.7566	4.04037	16.3457	273.766	248.208	7.12621	2.39715	9200.23		4.71101	0.0573873	0.0796963	0.000546119	0.929303		1240.89	15.1159	1236.47	17.0843	1189.48	6.76467		29µm	5Hz	1.81	Spot		80.8126	9.01657	110017	8899.36	35824.1	633797	676185	268.606	1585.11	6.59162e+07	6.46686e+06	69122.7	128
2016-003-zr-124	MA02B185	0.295948	0.0123936	0.0858763	0.0145649	0.103114	0.00685643		0.00725919	38.6644	3.98826	11.8355	145.565	135.66	11.0257	4.58283	10878.7		3.37898	0.0418775	0.103114	0.000706995	0.96918		1671.18	20.7119	1665.23	24.254	1680.92	6.33058		29µm	5Hz	1.81	Spot		71.4957	15.5515	82542.9	8652.01	25548.1	331908	363991	409.379	2984.87	6.49265e+07	7.53143e+06	71579.2	129
2016-003-zr-125	MA02B186	0.327807	0.0122792	0.0939967	0.0141535	0.108755	0.00502865		4.63972e-08	69.3638	7.54356	12.854	144.178	220.65	10.6649	20.2293	11428.5		3.05058	0.0374585	0.108755	0.000546891	0.984633		1827.74	22.4431	1815.82	25.7003	1778.67	4.58641		29µm	5Hz	1.81	Spot		102.502	0.0001	148980	16463.8	27914.7	330729	595603	398.436	13256.4	6.53244e+07	7.96007e+06	72770.1	130
2016-003-zr-126	MA02B187	0.33877	0.0122592	0.09992	0.0146331	0.11631	0.00702722		4.64398e-08	31.8021	3.70069	9.2691	98.1884	97.5241	14.8095	31.9114	10806.3		2.95185	0.0361875	0.11631	0.000817335	0.989972		1880.75	23.0566	1924.96	28.1681	1900.26	6.31521		29µm	5Hz	1.81	Spot		80.7833	0.0001	68242.4	8069.21	20111.1	225022	263000	552.847	20894.1	6.52689e+07	7.51992e+06	70229.8	131
2016-003-zr-127	MA02B188	0.285365	0.0123121	0.0843455	0.0143019	0.0986076	0.00603057		4.73521e-08	50.2814	4.94625	16.6126	206.29	182.82	6.57393	7.00909	11017.1		3.50428	0.043145	0.0986076	0.00059466	0.964074		1618.33	19.925	1636.72	23.4081	1597.96	5.62779		29µm	5Hz	1.81	Spot		95.9635	0.0001	105818	10577.2	35349.7	463643	483513	240.715	4501.11	6.40158e+07	7.51901e+06	68018.7	132
2016-003-zr-128	MA02B189	0.336454	0.012099	0.0973455	0.0149261	0.114329	0.00510292		0.00740776	82.5119	9.44324	9.4265	102.488	254.533	6.39324	14.8578	12706.7		2.97217	0.0359603	0.114329	0.000583413	0.988843		1869.59	22.6202	1877.6	28.0252	1869.34	4.60292		29µm	5Hz	1.81	Spot		56.1751	15.4989	172038	20006.1	19872.5	228203	666916	231.96	9453.55	6.34264e+07	8.59179e+06	66121.2	133
2016-003-zr-129	MA02B190	0.221022	0.0127691	0.0671497	0.0152791	0.0840323	0.00705146		4.72526e-08	43.2094	3.62973	6.05812	95.2285	202.973	7.09872	32.4727	10872.4		4.52445	0.0577729	0.0840323	0.00059255	0.933413		1287.27	16.4372	1313.62	20.0709	1293.3	6.85828		29µm	5Hz	1.81	Spot		89.4255	0.0001	91127.3	7778.08	12918.2	214470	537919	260.553	20900.2	6.41595e+07	7.43605e+06	65649.6	134
2016-003-zr-131	MA02B195	0.284707	0.0130222	0.084332	0.0173672	0.0989268	0.00837285		4.63472e-08	22.9314	2.26059	3.28582	41.1602	83.5508	15.3461	0.671199	10339.5		3.51239	0.045739	0.0989268	0.000828299	0.963756		1615.02	21.0311	1636.46	28.4207	1603.99	7.8075		29µm	5Hz	1.81	Spot		24.4112	0.0001	49307.7	4938.53	7143.55	94499.6	225726	574.677	440.59	6.54354e+07	7.21018e+06	68542.7	139
2016-003-zr-132	MA02B196	0.31437	0.0120907	0.0915674	0.0145585	0.114608	0.00530762		0.00720049	69.8931	8.01387	11.1026	127.892	229.781	13.9661	31.404	10919.5		3.18096	0.0384602	0.114608	0.000608297	0.978103		1762.18	21.306	1770.89	25.7814	1873.73	4.78504		29µm	5Hz	1.81	Spot		147.425	16.2219	156923	18280.1	25203.4	306584	648187	546.17	21526	6.83293e+07	7.95095e+06	67531.9	140
2016-003-zr-133	MA02B197	0.276129	0.016062	0.0845922	0.0160675	0.103958	0.00811668		0.00948695	61.2358	6.37812	8.29365	106.229	232.91	20.5349	53.5422	12127.6		3.6215	0.0581686	0.103958	0.000843795	0.959629		1571.84	25.2469	1641.32	26.3719	1695.96	7.47988		29µm	5Hz	1.81	Spot		88.9151	23.1492	148911	15757.7	20391.5	275810	711595	869.913	39753.2	7.40126e+07	9.56461e+06	68468.3	141
2016-003-zr-134	MA02B198	0.225589	0.0141346	0.0722301	0.019366	0.0868463	0.0172944		0.0164961	32.1435	2.77654	11.2484	161.258	140.878	55.306	45.1642	11378.2		4.43284	0.0626562	0.0868463	0.00150196	0.935564		1311.34	18.5352	1409.61	27.2986	1357.09	16.6709		29µm	5Hz	1.81	Spot		95.3293	30.4925	59213.4	5196.38	20950.6	317159	326047	1775.09	25404	5.60709e+07	6.79788e+06	69144.6	142
2016-003-zr-135	MA02B199	0.253538	0.0146159	0.0703339	0.0172044	0.0916394	0.00535565		0.0120853	77.8284	7.14224	9.78981	151.795	322.34	16.7972	96.7555	10788.1		3.94418	0.0576477	0.0916394	0.000490789	0.948816		1456.7	21.2909	1373.84	23.636	1459.93	5.09031		29µm	5Hz	1.81	Spot		37.8569	24.9123	159886	14906.4	20334.2	332927	831927	601.298	60695.7	6.25334e+07	7.1878e+06	69840.2	143
2016-003-zr-136	MA02B200	0.211518	0.012251	0.062632	0.0143201	0.081154	0.00743179		4.62387e-08	38.5715	3.1353	11.7705	197.31	188.231	14.63	0.018156	9188.87		4.72772	0.0579194	0.081154	0.00060312	0.928952		1236.9	15.1533	1227.87	17.5832	1225.18	7.29877		29µm	5Hz	1.81	Spot		98.3372	0.0001	83134.2	6865.15	25649.9	454014	509671	549.539	11.9501	6.56115e+07	6.42327e+06	70461.3	144
2016-003-zr-137	MA02B201	0.329799	0.012861	0.0942548	0.0135519	0.11298	0.0043851		4.65994e-08	112.977	12.7881	24.7036	276.92	356.953	12.4522	106.519	9435.42		3.03215	0.0389963	0.11298	0.000495428	0.985602		1837.41	23.6308	1820.59	24.6725	1847.89	3.96571		29µm	5Hz	1.81	Spot		69.9924	0.0001	241619	27784.3	53416.8	632252	959017	464.181	69571.6	6.51082e+07	6.54466e+06	69631.1	145
2016-003-zr-138	MA02B202	0.264617	0.012491	0.0800129	0.0146244	0.0930776	0.00577946		0.00696573	79.1695	7.38213	15.8007	213.761	317.34	7.13694	28.0664	10790.4		3.77904	0.047204	0.0930776	0.000537938	0.954109		1513.42	18.9041	1555.8	22.7526	1489.47	5.47131		29µm	5Hz	1.81	Spot		72.7691	15.6604	177386	16803	35794.2	511293	893197	278.761	19206.2	6.82155e+07	7.84129e+06	68470.6	146
2016-003-zr-139	MA02B203	0.323441	0.011984	0.0933114	0.0175844	0.108141	0.00438378		0.00228655	113.918	12.3562	2.81308	31.9011	365.343	6.30732	9.02185	13092.4		3.09175	0.0370515	0.108141	0.000474068	0.982509		1806.51	21.6492	1803.15	31.7074	1768.34	4.00337		29µm	5Hz	1.81	Spot		123.322	5.01636	249072	27444.5	6218.55	74457.6	1.00342e+06	240.435	6024.9	6.65708e+07	9.28423e+06	69894.9	147
2016-003-zr-140	MA02B204	0.229397	0.014889	0.0682646	0.0152907	0.0884708	0.00716918		0.0185603	47.5654	4.20765	8.70915	127.849	206.648	9.38516	36.2621	11215		4.35925	0.0649048	0.0884708	0.000634263	0.937361		1331.34	19.8223	1334.72	20.4089	1392.73	6.87673		29µm	5Hz	1.81	Spot		140.76	39.7174	101441	9115.74	18778.9	291057	553595	349.014	23622.4	6.49382e+07	7.75741e+06	70047.7	148
2016-003-zr-141	MA02B205	0.29212	0.0123574	0.0842593	0.0153133	0.0983542	0.00762768		4.65122e-08	34.6633	3.40587	6.51441	82.2641	123.842	12.5427	6.7504	9424.06		3.42325	0.0423024	0.0983542	0.000750214	0.967332		1652.12	20.4159	1635.11	25.039	1593.15	7.12268		29µm	5Hz	1.81	Spot		134.033	0.0001	74273.7	7413.34	14112.6	188156	333315	468.698	4418.43	6.52482e+07	6.54939e+06	69979.8	149
2016-003-zr-143	MA02B207	0.328998	0.0122974	0.090899	0.0140888	0.111478	0.00417136		0.00399649	166.246	18.5522	19.2226	223.639	522.754	8.43545	41.5102	13866.5		3.03953	0.0373783	0.111478	0.000465013	0.985213		1833.53	22.5476	1758.51	24.7752	1823.65	3.78354		29µm	5Hz	1.81	Spot		48.0894	8.51746	353116	40028.5	41280.5	507030	1.39465e+06	312.558	26937.1	6.46884e+07	9.55299e+06	69238	151
2016-003-zr-144	MA02B208	0.201883	0.0131829	0.062099	0.0167384	0.0810311	0.0124407		0.00556429	17.6197	1.4324	3.77005	63.3642	88.624	13.9286	10.8786	10743.4		4.95336	0.0652995	0.0810311	0.00100809	0.924448		1185.43	15.6273	1217.73	20.3828	1222.2	12.2233		29µm	5Hz	1.81	Spot		88.2088	12.2381	38622.7	3189.37	8355.14	148249	243995	532.678	7285.71	6.6762e+07	7.63827e+06	69132.2	152
2016-003-zr-145	MA02B209	0.328389	0.0125065	0.096575	0.0150407	0.1094	0.00723105		4.659e-08	29.6321	3.23799	8.04482	88.1338	93.7366	3.42472	0.321313	9634.41		3.04517	0.0380843	0.1094	0.000791074	0.984916		1830.57	22.8939	1863.4	28.0268	1789.44	6.58636		29µm	5Hz	1.81	Spot		61.6189	0.0001	63388.6	7035.85	17399.1	201226	251844	127.834	210.021	6.51572e+07	6.68473e+06	68819	153
2016-003-zr-146	MA02B210	0.306194	0.0128853	0.0917689	0.014465	0.108967	0.00584655		0.0107768	43.9762	4.81158	8.43263	97.888	150.001	12.7994	26.5366	11024.9		3.26591	0.0420823	0.108967	0.000637084	0.974138		1721.95	22.1879	1774.62	25.6698	1782.23	5.33004		29µm	5Hz	1.81	Spot		88.8357	24.2022	98430	10939.1	19082.4	233841	421663	499.955	18149.6	6.81791e+07	8.00384e+06	68614.2	154
2016-003-zr-147	MA02B211	0.344417	0.0133794	0.104101	0.0149989	0.114316	0.00507185		0.00176297	69.0985	7.88931	21.8496	224.489	209.38	12.5259	120.364	11631.4		2.90345	0.0388466	0.114316	0.000579793	0.992725		1907.89	25.5265	2001.65	30.0225	1869.13	4.57502		29µm	5Hz	1.81	Spot		127.172	3.6279	141718	16435.1	45306.1	491383	539312	448.391	75438.3	6.24777e+07	7.73759e+06	68242.4	155
2016-003-zr-148	MA02B212	0.326858	0.0122626	0.0938846	0.0136703	0.109772	0.00519372		0.00772675	66.7992	7.35549	20.6192	232.936	212.745	6.11166	9.43059	11405.6		3.05943	0.0375164	0.109772	0.000570125	0.984171		1823.14	22.3563	1813.75	24.7945	1795.63	4.72706		29µm	5Hz	1.81	Spot		45.8494	16.4013	141319	15805.6	44101.8	525923	565229	225.704	6097.25	6.44504e+07	7.82652e+06	69293.4	156
2016-003-zr-149	MA02B213	0.246042	0.0141207	0.0717667	0.0144	0.0918407	0.00578464		4.73671e-08	83.1247	7.64397	12.4883	174.192	338.294	10.8395	52.3956	12330.4		4.06434	0.0573912	0.0918407	0.000531266	0.945248		1418.03	20.0236	1400.88	20.1727	1464.09	5.49495		29µm	5Hz	1.81	Spot		107.569	0.0001	174906	16336.4	26566.3	391152	893907	398.195	33694.8	6.41059e+07	8.41541e+06	69937.2	157
2016-003-zr-150	MA02B218	0.233379	0.0121131	0.0707716	0.0160546	0.0849598	0.00727678		4.72392e-08	44.5336	3.79238	4.72055	70.0079	197.668	7.77643	0.639975	9450.43		4.28488	0.051903	0.0849598	0.000618234	0.939242		1352.18	16.3791	1382.1	22.1892	1314.62	7.05619		29µm	5Hz	1.81	Spot		86.4515	0.0001	93961	8126.43	10069.3	157612	523672	286.648	412.815	6.43017e+07	6.46773e+06	72087.7	162
2016-003-zr-151	MA02B219	0.209379	0.0139033	0.0628804	0.0176554	0.0808415	0.0157454		4.7407e-08	9.00774	0.724665	2.88557	48.4576	44.5291	32.2585	1.41589	9405.28		4.77603	0.0664027	0.0808415	0.00127288	0.92795		1225.51	17.0387	1232.59	21.7619	1217.59	15.4805		29µm	5Hz	1.81	Spot		61.2828	0.0001	18938.2	1547.32	6133.37	108706	117549	1185.04	910.15	6.40786e+07	6.41413e+06	72649.2	163
2016-003-zr-152	MA02B220	0.338898	0.0124292	0.0965339	0.0147218	0.113478	0.00628637		0.0055138	42.6547	4.85351	7.72278	84.2008	130.271	15.0568	1.66379	10918.6		2.95074	0.0366753	0.113478	0.000713366	0.990034		1881.37	23.3838	1862.64	27.4215	1855.85	5.67966		29µm	5Hz	1.81	Spot		89.5112	11.606	89488	10341.1	16380	188482	343150	552.024	1067.29	6.39463e+07	7.43036e+06	73320.3	164
2016-003-zr-153	MA02B221	0.320507	0.0143428	0.0901174	0.0174177	0.112876	0.00934608		0.0116467	90.6845	10.2608	11.8168	130.622	277.834	11.388	45.288	12496.9		3.12006	0.0447503	0.112876	0.00105495	0.981083		1792.2	25.7052	1744.02	30.3769	1846.22	8.45392		29µm	5Hz	1.81	Spot		67.8788	19.3253	149977	17233.7	19757.5	230490	576904	329.175	22902.8	5.04123e+07	6.70414e+06	71898.6	165
2016-003-zr-154	MA02B222	0.203397	0.012602	0.060879	0.0138551	0.0810224	0.00485615		0.0165644	94.2743	7.64642	24.2991	420.926	480.779	9.19369	112.135	12872.3		4.91648	0.0619577	0.0810224	0.000393457	0.925155		1193.55	15.0411	1194.5	16.5498	1221.99	4.77142		29µm	5Hz	1.81	Spot		93.0168	36.7083	208235	17152.1	54261.2	991967	1.33327e+06	354.973	75743.1	6.73337e+07	9.22291e+06	71752.9	166
2016-003-zr-155	MA02B223	0.310766	0.0122908	0.0909517	0.0163158	0.104835	0.00616732		0.00329668	42.8786	4.49639	4.52354	52.3655	142.694	7.95008	0.000150895	9326.61		3.21785	0.03955	0.104835	0.000646549	0.976354		1744.48	21.4411	1759.48	28.7074	1711.41	5.67237		29µm	5Hz	1.81	Spot		63.6665	7.16732	92917	9894.86	9909.94	121065	388206	301.183	0.1	6.60624e+07	6.55593e+06	73015.4	167
2016-003-zr-156	MA02B224	0.313509	0.0127621	0.091202	0.0166615	0.114192	0.00698105		5.25163e-08	107.834	12.3337	9.3067	104.043	340.993	17.2122	151.741	11269.3		3.1897	0.0407071	0.114192	0.000797177	0.977685		1757.95	22.4351	1764.12	29.3928	1867.16	6.29868		29µm	5Hz	1.81	Spot		175.226	0.0001	204663	23771.6	17857.2	210669	812489	571.195	88081.3	5.78643e+07	6.93805e+06	73079.8	168
2016-003-zr-157	MA02B225	0.309896	0.0133317	0.0894593	0.0151185	0.109448	0.0111135		0.0116065	23.2133	2.5368	7.72758	91.0956	77.8556	17.764	11.7746	10688.8		3.22689	0.0430199	0.109448	0.00121635	0.975932		1740.2	23.1998	1731.81	26.1825	1790.25	10.1216		29µm	5Hz	1.81	Spot		151.522	24.1598	48162.1	5344.83	16208.7	201633	202785	644.518	7472.08	6.32594e+07	7.19386e+06	72230.5	169
2016-003-zr-158	MA02B226	0.263665	0.0122004	0.0771235	0.0155102	0.0969736	0.0072023		0.00483279	44.7485	4.3421	5.91697	81.2558	176.399	11.6902	16.2858	12716.2		3.7927	0.0462725	0.0969736	0.000698433	0.953653		1508.56	18.4051	1501.65	23.2909	1566.71	6.74877		29µm	5Hz	1.81	Spot		25.9823	10.3942	95929.8	9452.47	12823.5	185828	474718	438.308	10679.2	6.53669e+07	8.84299e+06	69721.2	170
2016-003-zr-159	MA02B227	0.2561	0.0141161	0.0734373	0.0180754	0.0927106	0.00964522		3.92565e-08	84.1958	7.78759	18.4567	279.961	369.123	3.68511	39.733	12839		3.90473	0.0551196	0.0927106	0.000894214	0.950038		1469.86	20.7487	1432.36	25.8904	1481.98	9.14013		29µm	5Hz	1.81	Spot		116.318	0.0001	213778	20078.8	47376	758298	1.17651e+06	163.669	30860.5	7.74253e+07	1.05748e+07	69218.7	171
2016-003-zr-160	MA02B228	0.319561	0.0121662	0.0905816	0.0136445	0.110384	0.00647498		0.00356892	67.5332	7.4551	31.8313	369.822	218.474	21.4568	24.0133	10380.6		3.12929	0.0380716	0.110384	0.000714737	0.980624		1787.59	21.7481	1752.63	23.9138	1805.75	5.88588		29µm	5Hz	1.81	Spot		149.726	7.68168	144885	16241.1	69038.1	846361	588363	805.329	15760.4	6.54251e+07	7.22439e+06	68759.8	172
2016-003-zr-161	MA02B229	0.202415	0.0157028	0.0624311	0.0174204	0.0811704	0.0103387		0.0156609	53.5945	4.34536	13.836	246.465	294.471	12.3245	31.5117	9990.64		4.94034	0.077577	0.0811704	0.0008392	0.924697		1188.28	18.6593	1224.05	21.3233	1225.57	10.1531		29µm	5Hz	1.81	Spot		23.9651	41.6543	142086	11697.9	37082.6	697000	979946	571.691	25558.8	8.08534e+07	8.59214e+06	68617.2	173
2016-003-zr-164	MA02B232	0.254499	0.0120706	0.0742908	0.013783	0.0919353	0.00476522		0.00170232	99.3927	9.16512	14.7014	208.232	405.196	9.69162	4.91766	11978		3.92929	0.0474288	0.0919353	0.000438092	0.949274		1461.64	17.6428	1448.42	19.9637	1466.05	4.52538		29µm	5Hz	1.81	Spot		25.4016	3.63597	211607	19812.6	31641.6	472857	1.08276e+06	361.17	3203.7	6.49418e+07	8.27268e+06	68251.9	176
2016-003-zr-165	MA02B233	0.240029	0.0162593	0.0725261	0.0244909	0.089806	0.0148776		4.08164e-08	30.7096	2.74429	4.51242	68.3328	143.825	7.75154	41.6601	12611.5		4.16616	0.0677389	0.089806	0.0013361	0.942392		1386.85	22.5492	1415.19	34.6594	1421.41	14.2147		29µm	5Hz	1.81	Spot		78.9268	0.0001	74996	6804.77	11140.2	177987	440833	331.398	31133.6	7.44972e+07	9.99121e+06	65925.7	177
2016-003-zr-166	MA02B234	0.330924	0.0121039	0.0969693	0.0145726	0.113923	0.00485116		0.00171197	72.6225	8.27523	9.68749	105.673	228.106	6.43278	13.0479	10447.2		3.02184	0.0365762	0.113923	0.000552658	0.98615		1842.86	22.3059	1870.67	27.2604	1862.91	4.37923		29µm	5Hz	1.81	Spot		24.8124	3.75519	158784	18370.9	21412.5	246425	625949	246.26	8730.71	6.67023e+07	7.41017e+06	65649.8	178
2016-003-zr-167	MA02B235	0.256656	0.0121173	0.0751444	0.0142998	0.0911089	0.00626465		4.6843e-08	63.8074	5.81544	10.3344	145.147	258.668	4.56162	7.94021	12063.9		3.89627	0.0472122	0.0911089	0.000570765	0.950303		1472.71	17.8452	1464.48	20.9418	1448.88	5.96318		29µm	5Hz	1.81	Spot		44.9791	0.0001	135778	12564.5	22231.1	329409	690801	169.979	5171.19	6.49216e+07	8.32798e+06	65845.2	179
2016-003-zr-168	MA02B236	0.336954	0.0132116	0.0959435	0.0140254	0.113332	0.00445173		5.95973e-08	226.41	25.6939	30.4732	324.132	668.753	11.5583	191.074	11689.2		2.96776	0.039209	0.113332	0.000504525	0.989087		1872	24.7322	1851.76	25.9717	1853.52	4.02322		29µm	5Hz	1.81	Spot		54.6973	0.0001	378681	43632.2	51524.3	578172	1.40373e+06	338.569	97815.8	5.10314e+07	6.34258e+06	64890.2	180
2016-003-zr-170	MA02B238	0.326887	0.0122465	0.0942092	0.0154284	0.110134	0.00676344		4.65445e-08	39.5402	4.35341	5.68899	63.5911	125.515	4.69065	4.63947	11629.9		3.05916	0.037464	0.110134	0.000744883	0.984185		1823.27	22.3287	1819.74	28.0758	1801.61	6.15121		29µm	5Hz	1.81	Spot		18.3505	0.0001	84679.9	9465.76	12316.6	145235	337327	175.983	3041.54	6.53516e+07	8.08019e+06	65721.4	182
2016-003-zr-171	MA02B239	0.226019	0.0124821	0.0675059	0.0148021	0.0857506	0.00890815		0.000641073	32.837	2.81767	6.60731	102.842	151.006	8.77319	1.37094	9997.31		4.42441	0.0552259	0.0857506	0.00076388	0.935767		1313.6	16.3965	1320.36	19.5442	1332.57	8.6164		29µm	5Hz	1.81	Spot		102.391	1.36899	69898.7	6089.37	14218.1	233452	403368	327.203	893.38	6.49602e+07	6.90395e+06	65893.1	183
2016-003-zr-172	MA02B240	0.219841	0.0144931	0.0680818	0.0157678	0.0823546	0.0124063		0.00371845	83.8158	6.95334	42.1636	613.431	374.128	10.935	89.6989	9454.29		4.54874	0.0659252	0.0823546	0.00102171	0.932858		1281.03	18.5661	1331.26	20.9911	1253.96	12.134		29µm	5Hz	1.81	Spot		27.2851	5.82119	130795	11016.1	66513.7	1.02079e+06	732614	299.017	42853.9	4.76249e+07	4.78636e+06	67014	184
2016-003-zr-174	MA02B245	0.547952	0.0122773	0.150396	0.0146264	0.193031	0.00388145		0.00590652	69.3974	13.4098	9.28234	65.1832	131.836	20.6879	48.7805	10138.8		1.82498	0.0224058	0.193031	0.000749242	1.08988		2816.65	34.5808	2831.85	41.4198	2768.16	3.18416		29µm	5Hz	1.81	Spot		60.8893	12.8568	150581	29538.2	20360.4	150803	358914	787.146	32415.4	6.62424e+07	7.13744e+06	71818	189
2016-003-zr-175	MA02B246	0.258722	0.0122209	0.0750094	0.0145487	0.0918608	0.00562406		0.00227342	82.17	7.53813	8.52719	119.866	330.946	2.50371	25.2262	11917.8		3.86515	0.0472357	0.0918608	0.00051663	0.95129		1483.3	18.1273	1461.94	21.2694	1464.51	5.3421		29µm	5Hz	1.81	Spot		92.0073	4.92582	177477	16527.9	18618	276029	896813	94.8378	16687.2	6.59422e+07	8.35132e+06	69932.3	190
2016-003-zr-176	MA02B247	0.217903	0.0123623	0.0653698	0.013813	0.080702	0.00838292		4.61261e-08	34.4051	2.78742	14.8063	237.692	163.374	30.0523	0.563129	10552.5		4.58919	0.056733	0.080702	0.000676519	0.931947		1270.79	15.7099	1279.88	17.679	1214.2	8.24591		29µm	5Hz	1.81	Spot		69.1427	0.0001	74354.6	6115.15	32346.7	547670	442967	1139.18	372.756	6.59855e+07	7.39909e+06	69824.7	191
2016-003-zr-177	MA02B250	0.294688	0.015297	0.0929129	0.0208154	0.108044	0.00971665		4.16282e-08	32.8905	3.58758	7.77218	92.7168	126.149	33.6132	531.968	9543.27		3.39342	0.0519091	0.108044	0.00104983	0.968572		1664.91	25.4682	1795.79	37.3799	1766.7	8.87527		29µm	5Hz	1.81	Spot		87.3467	0.0001	78762.9	8720.69	18814.2	236697	378968	1412.44	390258	7.31303e+07	7.41472e+06	68929	194
2016-003-zr-178	MA02B248	0.314372	0.0148433	0.0930708	0.0155402	0.108849	0.00608226		4.61273e-08	40.7262	4.43143	5.2901	59.953	135.812	8.25903	4.33018	12498.6		3.18094	0.0472156	0.108849	0.000662049	0.978104		1762.19	26.1566	1798.71	27.9523	1780.24	5.54628		29µm	5Hz	1.81	Spot		87.013	0.0001	88013.6	9721.46	11556.7	138132	368217	313.108	2866.43	6.59882e+07	8.7635e+06	69253.4	192
2016-003-zr-179	MA02B249	0.212592	0.0136171	0.0633595	0.0172568	0.0805741	0.0142711		4.64842e-08	9.55992	0.771727	3.25979	54.8133	47.1084	18.0286	0.488185	9923.71		4.70384	0.0640525	0.0805741	0.00114988	0.929455		1242.61	16.9208	1241.7	21.4278	1211.08	14.0442		29µm	5Hz	1.81	Spot		59.7947	0.0001	20501.5	1679.96	7066.65	125317	126738	678.33	320.702	6.54861e+07	6.90473e+06	69370.8	193
2016-003-zr-180	MA02B251	0.212973	0.0123187	0.0626884	0.015088	0.0806504	0.00860677		4.68739e-08	28.0247	2.26714	6.02881	101.292	136.742	10.5536	0.000153479	11286.7		4.69542	0.0578415	0.0806504	0.00069414	0.929634		1244.64	15.3323	1228.94	18.5422	1212.94	8.46765		29µm	5Hz	1.81	Spot		43.219	0.0001	59600.7	4894.15	12960.8	229643	364810	393.894	0.1	6.49506e+07	7.78799e+06	68657.5	195
2016-003-zr-181	MA02B252	0.252192	0.0138298	0.0729567	0.0142625	0.0919312	0.00502007		0.00302017	128.674	11.8198	22.6153	331.535	535.328	13.2208	107.392	10071.4		3.96523	0.0548383	0.0919312	0.000461501	0.948175		1449.77	20.0501	1423.31	20.2999	1465.96	4.76746		29µm	5Hz	1.81	Spot		70.2548	6.52337	277060	25833.1	49223.8	760976	1.44593e+06	499.652	70847.7	6.57636e+07	7.03604e+06	67362.6	196
2016-003-zr-181B	MA02B253	0.340639	0.0129665	0.0962377	0.0158959	0.108845	0.00720815		5.57518e-08	100.468	10.9649	11.3767	119.892	294.239	6.10059	20.8387	13277		2.93566	0.0380652	0.108845	0.000784574	0.990882		1889.74	24.5033	1857.18	29.5215	1780.18	6.573		29µm	5Hz	1.81	Spot		50.0675	0.0001	179644	19900.6	20563.1	228518	659958	191.489	11417.1	5.46155e+07	7.70268e+06	68291.6	197
2016-003-zr-182	MA02B254	0.297455	0.0149378	0.0843474	0.0158025	0.108583	0.00740928		0.00417986	104.326	11.3564	22.046	260.573	344.354	13.4109	107.004	11087.7		3.36186	0.0502186	0.108583	0.000804523	0.969909		1678.68	25.0757	1636.75	25.8648	1775.78	6.7601		29µm	5Hz	1.81	Spot		213.767	7.83953	195059	21551.8	41666.8	519322	807603	440.23	61305.7	5.71127e+07	6.7263e+06	68386.2	198
2016-003-zr-184	MA02B256	0.213321	0.0133	0.0657105	0.0153362	0.0823983	0.00773153		0.00569173	44.6273	3.67816	35.5106	567.319	218.976	24.7416	18.2977	10032.1		4.68777	0.0623471	0.0823983	0.000637065	0.929797		1246.49	16.5782	1286.34	19.7275	1255	7.56076		29µm	5Hz	1.81	Spot		45.7681	10.9803	85826.8	7179.71	69033.9	1.16294e+06	528215	835.63	10784.4	5.87535e+07	6.26008e+06	68741.8	200
2016-003-zr-185	MA02B257	0.305128	0.0135511	0.0902359	0.0154726	0.1072	0.00680037		0.00352412	32.123	3.44714	6.68703	78.8109	110.844	6.62292	20.2835	10931		3.27732	0.0444111	0.1072	0.000729002	0.973622		1716.69	23.2629	1746.22	27.0186	1752.36	6.22261		29µm	5Hz	1.81	Spot		107.609	7.49513	68108.4	7418.04	14331.7	178100	294766	246.636	13180.6	6.47774e+07	7.51994e+06	68496.3	201
2016-003-zr-186	MA02B258	0.201552	0.012578	0.0599602	0.014753	0.0823348	0.0110274		0.00192308	23.5961	1.94945	8.50336	148.939	121.038	12.583	5.20797	9506.23		4.9615	0.0624056	0.0823348	0.000907941	0.924294		1183.65	14.8879	1176.99	17.364	1253.49	10.7862		29µm	5Hz	1.81	Spot		51.6016	4.23342	51783.6	4342.14	18863.4	348372	333151	485.084	3503.12	6.70531e+07	6.7692e+06	67510	202
2016-003-zr-187	MA02B259	0.323828	0.0135807	0.0929037	0.0147876	0.107838	0.00766936		0.00821167	45.0328	4.86864	7.81095	88.9388	149.333	13.8015	21.0718	11600.3		3.08806	0.041938	0.107838	0.000827048	0.982697		1808.4	24.5593	1795.62	26.5528	1763.21	7.0083		29µm	5Hz	1.81	Spot		28.7325	18.1791	99387.3	10905.4	17425.4	209200	413344	535.141	14255	6.74367e+07	8.30701e+06	67621.7	203
2016-003-zr-188	MA02B260	0.318846	0.01215	0.0906339	0.0141952	0.107329	0.00511438		4.66326e-08	94.5929	10.1646	15.8364	184.287	308.644	4.49588	10.1813	11776.9		3.13631	0.0381061	0.107329	0.000548922	0.980276		1784.09	21.6767	1753.6	24.8926	1754.56	4.67858		29µm	5Hz	1.81	Spot		135.752	0.0001	202223	22053.9	34221.9	419880	827509	168.884	6672.14	6.53274e+07	8.16928e+06	67420.1	204
2016-003-zr-190	MA02B261	0.323347	0.0124806	0.0940893	0.0153523	0.108615	0.00568164		4.568e-08	51.1722	5.57097	6.67935	74.976	164.847	5.64787	1.79026	12015.1		3.09266	0.0385983	0.108615	0.000617111	0.982463		1806.05	22.5407	1817.53	27.9032	1776.31	5.18349		29µm	5Hz	1.81	Spot		91.1657	0.0001	111680	12339.2	14734.9	174384	451181	216.613	1197.77	6.66944e+07	8.50849e+06	68341.4	205
2016-003-zr-191	MA02B262	0.317805	0.0123021	0.0911134	0.0144082	0.11055	0.00514211		0.0039644	57.7669	6.39545	11.5921	134.572	189.773	10.1981	49.1476	10428		3.14659	0.0387096	0.11055	0.000568463	0.97977		1779	21.8854	1762.48	25.3941	1808.48	4.67271		29µm	5Hz	1.81	Spot		141.448	8.44985	122749	13791.8	24898.4	304738	505698	380.871	32017.5	6.49407e+07	7.18995e+06	68859.1	206
2016-003-zr-193	MA02B264	0.218123	0.0124074	0.0669113	0.0145591	0.0817212	0.00860164		4.66116e-08	32.7307	2.66855	10.3419	163.908	156.55	26.304	0.320937	11405.5		4.58457	0.0568823	0.0817212	0.000702936	0.932051		1271.95	15.7815	1309.1	19.0593	1238.84	8.43111		29µm	5Hz	1.81	Spot		84.4876	0.0001	70005.7	5792.28	22358.7	373582	419879	989.095	210.475	6.53749e+07	7.91562e+06	69991.2	208
2016-003-zr-194	MA02B265	0.238494	0.0124488	0.0710724	0.0156628	0.0839274	0.00765794		0.0055229	32.6135	2.73262	5.7306	85.4422	142.135	6.31245	1.18749	9427.69		4.19298	0.0521974	0.0839274	0.000642711	0.941665		1378.86	17.1652	1387.78	21.7366	1290.87	7.45071		29µm	5Hz	1.81	Spot		27.8915	11.8631	69839.6	5938.46	12404.3	194972	381669	237.684	779.768	6.54585e+07	6.55097e+06	69749.1	209
2016-003-zr-195	MA02B266	0.319481	0.0127703	0.0918237	0.0160548	0.109865	0.00852287		4.53058e-08	21.0981	2.32676	4.56171	48.2751	68.6968	21.5675	23.1248	9450.7		3.13007	0.039972	0.109865	0.000936362	0.980585		1787.19	22.823	1775.63	28.5074	1797.16	7.75562		29µm	5Hz	1.81	Spot		95.0102	0.0001	46426.6	5195.85	10146.5	113195	189551	834.603	15604.8	6.72684e+07	6.74816e+06	70611.9	210
2016-003-zr-196	MA02B267	0.33487	0.0130274	0.0967385	0.0148397	0.114735	0.00925844		4.63144e-08	19.1423	2.19747	6.5396	71.336	59.3268	9.57235	18.8397	12042.7		2.98624	0.038903	0.114735	0.00106227	0.988071		1861.94	24.2563	1866.41	27.697	1875.73	8.34485		29µm	5Hz	1.81	Spot		75.0037	0.0001	41205.6	4800.22	14229.1	163622	160129	362.408	12437.2	6.58081e+07	8.41182e+06	72221	211
2016-003-zr-197	MA02B268	0.253758	0.0122207	0.0725862	0.0155482	0.0926865	0.00691024		0.000107745	30.3715	2.81521	4.5562	65.931	124.057	14.983	89.5441	11691		3.94077	0.0481588	0.0926865	0.000640486	0.948921		1457.83	17.8156	1416.33	22.0214	1481.49	6.5488		29µm	5Hz	1.81	Spot		132.274	0.235085	66065.6	6214.23	10017.8	152811	338355	573.302	59739	6.65049e+07	8.25212e+06	72317.1	212
2016-003-zr-198	MA02B269	0.261192	0.0124092	0.0748574	0.016324	0.0931832	0.00721219		0.00247534	30.9802	2.89249	4.78959	67.4109	123.402	8.73654	0.000154384	9616.18		3.82861	0.04751	0.0931832	0.000672055	0.95247		1495.94	18.5634	1459.08	23.8181	1491.61	6.82569		29µm	5Hz	1.81	Spot		64.6645	5.24335	65424.7	6198.55	10223.9	151681	326745	324.588	0.1	6.45698e+07	6.58975e+06	73136	213
2016-003-zr-199	MA02B270	0.245979	0.0126461	0.0718964	0.0146257	0.0912666	0.00796254		0.00308254	34.5887	3.16064	10.2243	149.484	145.113	6.90731	2.06941	10253.4		4.06539	0.0514112	0.0912666	0.000726714	0.945217		1417.7	17.9284	1403.32	20.5246	1452.17	7.57598		29µm	5Hz	1.81	Spot		32.8304	6.60209	73857.1	6848.35	22067.4	340083	388493	259.514	1355.41	6.52916e+07	7.10458e+06	71929.7	214
Huon River Formation
2016-129-zr-001	AP21C589	0.232306	0.00994382	0.0665191	0.0165643	0.088299	0.00885961		0.00935227	20.4514	1.80732	5.1207	75.9239	89.8587	6.87069	5.96781	9144.05		4.30467	0.0428049	0.088299	0.000782295	0.938735		1346.57	13.3901	1301.67	21.5612	1389	8.50257		29µm	5Hz	1.81	Spot		0.0001	18.3224	40239.9	3638.77	10244.6	179288	238231	229.594	3580.6	5.67536e+07	6.41825e+06	33737	3
2016-129-zr-003	AP21C591	0.306433	0.00938813	0.088137	0.0168706	0.104174	0.00725964		0.00177361	34.8419	3.63276	4.63917	51.3395	115.424	8.97352	6.34512	10847.9		3.26336	0.0306368	0.104174	0.000756264	0.974254		1723.13	16.177	1707.27	28.8026	1699.78	6.68685		29µm	5Hz	1.81	Spot		1.74109	3.40445	67168.5	7166.09	9093.59	118783	299821	293.798	3730.06	5.6293e+07	7.46226e+06	32883.9	5
2016-129-zr-004	AP21C592	0.257446	0.00928731	0.0716901	0.016212	0.0994752	0.00659841		0.0111497	75.4472	7.51971	13.2865	174.42	284.697	16.0703	399.206	11616.4		3.88431	0.0360748	0.0994752	0.000656378	0.950681		1476.76	13.7152	1399.43	22.6877	1614.29	6.14466		29µm	5Hz	1.81	Spot		87.2238	21.4937	146073	14897.3	26155.7	405284	742692	528.412	235689	5.68864e+07	8.02644e+06	33014.4	6
2016-129-zr-005	AP21C593	0.287931	0.0114797	0.0763801	0.0163927	0.121148	0.00670252		0.0512174	43.5309	5.39552	16.2426	209.683	154.012	16.1469	223.859	10204.6		3.47305	0.0398697	0.121148	0.000811997	0.96531		1631.18	18.7255	1487.69	24.3873	1973.2	5.97174		29µm	5Hz	1.81	Spot		1.96185	101.835	86927.2	11024.8	32979.5	502524	414391	547.606	136318	5.904e+07	7.27338e+06	33328.9	7
2016-129-zr-006	AP21C594	0.309	0.00934851	0.0859878	0.0153442	0.10722	0.00466411		0.00125667	93.1204	10.0021	18.0076	208.865	310.514	3.99897	26.1484	10451.4		3.23625	0.0302541	0.10722	0.000500088	0.975498		1735.78	16.227	1667.31	25.5835	1752.7	4.26766		29µm	5Hz	1.81	Spot		2.98204	2.42992	180843	19875.8	35558.2	486807	812518	131.894	15485.4	5.77787e+07	7.24558e+06	33589.9	8
2016-129-zr-007	AP21C595	0.279252	0.0125156	0.0551026	0.0204757	0.122527	0.00885372		0.0821408	64.3653	7.89431	16.5885	305.348	234.525	31.4644	432.328	9623.88		3.58099	0.0448182	0.122527	0.00108482	0.961131		1587.59	19.8697	1084.14	22.1987	1993.35	7.86989		29µm	5Hz	1.81	Spot		69.9612	53.497	42102.7	5283.81	11033	239710	206700	349.539	86237.5	1.95845e+07	2.24758e+06	33622.4	9
2016-129-zr-008	AP21C596	0.196381	0.0104544	0.0603632	0.0201549	0.078879	0.0152461		5.60143e-08	10.6701	0.844525	2.50823	40.1925	53.7961	15.247	1.85433	10993.5		5.09215	0.0532354	0.078879	0.0012026	0.921886		1155.85	12.0837	1184.67	23.8768	1169.1	15.0954		29µm	5Hz	1.81	Spot		0.0001	0.0001	19131.9	1549.45	4572.83	86490.6	129968	464.295	1013.93	5.40261e+07	7.03877e+06	32931.5	10
2016-129-zr-010	AP21C598	0.186919	0.0121258	0.0522247	0.0248864	0.0863036	0.0200897		0.00247167	9.63215	0.823324	2.93745	55.3376	48.9744	22.934	24.0013	10307.7		5.34992	0.0648717	0.0863036	0.00173382	0.917496		1104.66	13.3949	1028.94	25.6065	1344.99	19.3981		29µm	5Hz	1.81	Spot		2.62651	4.43774	17369.7	1519.18	5385.97	119762	118995	702.366	13198.9	5.50366e+07	6.63939e+06	33163.5	12
2016-129-zr-011	AP21C599	0.23791	0.00890613	0.0706772	0.0165852	0.0883104	0.00667046		0.00779519	46.4821	4.10908	7.49888	104.832	199.266	6.86556	24.8726	9196.88		4.20327	0.0374349	0.0883104	0.000589071	0.941388		1375.82	12.2532	1380.32	22.8929	1389.25	6.40142		29µm	5Hz	1.81	Spot		13.7996	15.1327	90630.9	8197.9	14866.5	245309	523493	227.341	14789.3	5.98942e+07	6.4061e+06	32949.4	13
2016-129-zr-012	AP21C600	0.312566	0.010207	0.0920283	0.0164672	0.106525	0.00721606		0.00558202	33.3811	3.55277	8.12644	87.5119	109.299	19.388	13.3543	8284.18		3.19932	0.0326555	0.106525	0.000768691	0.977227		1753.32	17.8962	1779.42	29.302	1740.79	6.61252		29µm	5Hz	1.81	Spot		0.0001	10.2379	61492.7	6696.64	15221.1	193472	271284	606.55	7502.13	5.69572e+07	5.45258e+06	32584.5	14
2016-129-zr-016	AP21C604	0.227746	0.0135172	0.0650274	0.0170997	0.103102	0.00808837		0.0417577	42.3797	4.35136	10.2979	156.984	189.327	82.838	1907.8	9652.93		4.39086	0.059352	0.103102	0.000833923	0.936581		1322.67	17.8788	1273.38	21.7745	1680.69	7.46824		29µm	5Hz	1.81	Spot		67.3105	57.4989	58613.7	6157.78	14481.3	260567	352801	1945.69	804690	4.39112e+07	4.77312e+06	32307.4	18
2016-129-zr-017	AP21C605	0.219578	0.0136693	0.052157	0.0241384	0.104388	0.00913147		0.0629017	51.1441	5.32327	14.5525	270.632	235.835	26.1215	296.503	9420.78		4.5542	0.0622529	0.104388	0.000953213	0.932734		1279.64	17.4919	1027.64	24.8055	1703.55	8.40698		29µm	5Hz	1.81	Spot		30.1681	56.2168	45911.4	4889.45	13282.4	291559	285239	398.223	81173.2	2.86937e+07	3.02402e+06	31880.9	19
2016-129-zr-018	AP21C609	0.194172	0.0130862	0.0572811	0.0181001	0.0910716	0.0159967		0.00823315	12.2768	1.12852	7.8851	131.048	61.4347	24.9248	33.043	10831.6		5.15008	0.0673949	0.0910716	0.00145684	0.920859		1143.93	14.9697	1125.83	20.3777	1448.1	15.2285		29µm	5Hz	1.81	Spot		29.693	11.253	16854.8	1585.25	11006.7	215916	113637	581.123	13835.4	4.5103e+07	5.32103e+06	33234	23
2016-129-zr-019	AP21C610	0.28128	0.00900422	0.0914893	0.0170401	0.112769	0.0055481		0.0372702	86.6253	9.79677	9.21235	99.3291	313.663	33.4907	439.985	9783.38		3.55517	0.0320116	0.112769	0.000625653	0.962107		1597.81	14.387	1769.44	30.1515	1844.51	5.01953		29µm	5Hz	1.81	Spot		0.0001	62.7767	146562	16959.2	15847.3	201683	715000	962.268	227034	5.5972e+07	5.92389e+06	32549	24
2016-129-zr-021	AP21C612	0.216354	0.0104361	0.0684726	0.0231272	0.0870597	0.0122578		0.00470588	40.7995	3.55006	6.15426	90.1103	187.056	4.37268	14.0883	12402.4		4.62206	0.0482365	0.0870597	0.00106716	0.93122		1262.58	13.1765	1338.66	30.9595	1361.82	11.8081		29µm	5Hz	1.81	Spot		7.44422	8.32569	72507.4	6455.14	11120.1	192183	447879	131.967	7636.05	5.96266e+07	7.89093e+06	31585.2	26
2016-129-zr-022	AP21C613	0.273779	0.0133055	0.0576969	0.0346443	0.111738	0.0122708		0.0169538	94.1782	10.5547	5.74507	91.6606	329.099	18.6737	146.042	13137.7		3.65259	0.0485996	0.111738	0.00137111	0.958501		1559.95	20.756	1133.78	39.2791	1827.87	11.1242		29µm	5Hz	1.81	Spot		36.9558	14.0671	78494.2	9000.58	4868.39	91681.3	369549	264.305	37123.7	2.81639e+07	3.92085e+06	32068.6	27
2016-129-zr-023	AP21C614	0.22972	0.00945487	0.0623588	0.0184506	0.0926151	0.00790057		0.0139186	33.9834	3.1445	6.4093	102.847	150.617	81.3382	446.581	10184.9		4.35313	0.0411583	0.0926151	0.000731712	0.937513		1333.03	12.6036	1222.67	22.559	1480.03	7.48881		29µm	5Hz	1.81	Spot		28.0677	23.866	58533.9	5541.52	11224.1	212591	349518	2379.15	234602	5.8622e+07	6.28276e+06	31493.3	28
2016-129-zr-024	AP21C615	0.204798	0.00917991	0.0606609	0.0155073	0.0807731	0.00857485		0.000725993	42.1446	3.40424	15.2748	251.435	210.054	12.9814	3.29257	10897.6		4.88287	0.0448243	0.0807731	0.000692617	0.925808		1201.04	11.0255	1190.34	18.459	1215.93	8.4326		29µm	5Hz	1.81	Spot		0.0001	1.19547	69712.1	5761.31	25688.7	499114	468113	364.645	1661.1	5.67052e+07	6.45704e+06	31567.5	29
2016-129-zr-025	AP21C616	0.351466	0.010267	0.0980101	0.0160939	0.124689	0.00626447		0.0131332	44.5121	5.56839	17.567	176.65	128.904	16.7289	102.039	10875		2.84523	0.0292119	0.124689	0.000781113	0.996163		1941.59	19.9343	1889.83	30.4147	2024.39	5.54841		29µm	5Hz	1.81	Spot		0.0001	21.3351	72638.5	9297.15	29146.3	345946	283405	463.594	50787.1	5.63515e+07	6.35821e+06	32166.5	30
2016-129-zr-026	AP21C617	0.313029	0.0112956	0.083666	0.0179432	0.11606	0.00793231		0.0128498	29.316	3.39832	8.56065	102.769	95.6665	16.9205	39.7006	11010		3.19459	0.036085	0.11606	0.000920622	0.977452		1755.6	19.8306	1624.05	29.1407	1896.4	7.13189		29µm	5Hz	1.81	Spot		0.0001	22.4058	51349.7	6090.14	15245.3	216024	225757	503.299	21209.7	6.09303e+07	6.91068e+06	32460	31
2016-129-zr-027	AP21C618	0.2621	0.00946772	0.0736474	0.0162919	0.0925626	0.00907633		0.0084698	27.1697	2.51661	7.50189	102.297	106.661	6.33311	3.38286	11352.7		3.81534	0.0361225	0.0925626	0.000840129	0.952904		1500.58	14.207	1436.31	23.4004	1478.96	8.60454		29µm	5Hz	1.81	Spot		9.43699	13.9063	44812.3	4246.74	12579.9	202478	237009	177.381	1701.78	5.77988e+07	6.71112e+06	32059.7	32
[truncated: 597 more rows]
